# Supplementary material for: High-throughput identification and quantification of bacterial cells in the microbiota based on 16S rRNA sequencing with single-base accuracy using BarBIQ
Source: Springer Nature journal article supplement (doi:10.1038/s41596-023-00906-8), 2023-11-27
Supplement: MOESM3 [file 41596_2023_906_MOESM3_ESM11.xlsx]

## Sheet: Sup Table 1
Supplementary Table 1 Information of oligomers and barcodes
Name	Category	Used step in protocol	Sequence (5'–3')	Suggested supplier	Purification method	Quantities to be ordered
F1-Fw	Primer	10	AGRGTTTGATYMTGGCTCAG	FASMAC/Eurofins	RPC/OPC	10 nmol
F1-Rv	Primer	10	CTGGCACGDAGTTAGCC	FASMAC/Eurofins	RPC/OPC	10 nmol
Barcode-1	Cellular barcode template	17	TCAGCCTCGACAGTCCAGTGACNNNNTNNNNGNNNNANNNNCNNNNNNNNAGATCGGAAGAGCGTCGTGTAGGGAAAGAGTGT	Integrated DNA Technologies	PAGE	100 nmole
Barcode-2	Cellular barcode template	17	TCAGCCTCGACAGTCCAGTGTGNNNNANNNNCNNNNTNNNNGNNNNNNNNAGATCGGAAGAGCGTCGTGTAGGGAAAGAGTGT	Integrated DNA Technologies	PAGE	100 nmole
Barcode-3	Cellular barcode template	17	TCAGCCTCGACAGTCCAGTGGANNNNCNNNNANNNNGNNNNTNNNNNNNNAGATCGGAAGAGCGTCGTGTAGGGAAAGAGTGT	Integrated DNA Technologies	PAGE	100 nmole
Barcode-4	Cellular barcode template	17	TCAGCCTCGACAGTCCAGTGCTNNNNGNNNNTNNNNCNNNNANNNNNNNNAGATCGGAAGAGCGTCGTGTAGGGAAAGAGTGT	Integrated DNA Technologies	PAGE	100 nmole
NoBiotin-Link-barcode-F	Primer	18	CGACTACGATCCGAACGCAGGAGCTCAGCCTCGACAGTCCAGTG	FASMAC/Eurofins	RPC/OPC	10 nmol
P5-D503-R1P-barcode-R	Primer	18	AATGATACGGCGACCACCGAGATCTACACCCTATCCTACACTCTTTCCCTACACGACGCTCTTCCGATCT	FASMAC/Eurofins	RPC/OPC	10 nmol
P5-index-R1P-barcode-R*	Primer	23	AATGATACGGCGACCACCGAGATCTACACXXXXXXXXACACTCTTTCCCTACACGACGCTCTTCCGATCT	Integrated DNA Technologies	PAGE	100 nmole
P7-R2P-341F	Primer	23	CAAGCAGAAGACGGCATACGAGATGTGACTGGAGTTCCTTGGCACCCGAGAATTCCACCTACGGGNGGCWGCAG	Integrated DNA Technologies	PAGE	100 nmole
Biotin-Link-805R	Primer	23	/5Biosg/GCTCCTGCGTTCGGATCGTAGTCGGAC/iBiodT/ACHVGGGTATCTAATCC	Integrated DNA Technologies	PAGE	100 nmole
Biotin-Link-barcode-F	Primer	23	/5Biosg/CGACTACGATCCGAACGCAGGAGCTCAGCC/iBiodT/CGACAGTCCAGTG	Integrated DNA Technologies	PAGE	100 nmole
P1_qPCR_Fw	Primer	100, 151, 160, 162, 169	AATGATACGGCGCACCACCGA	FASMAC/Eurofins	RPC/OPC	50 nmole
P2_qPCR_Rv	Primer	100, 151, 160, 162, 169	CAAGCAGAAGACGGCATACGA	FASMAC/Eurofins	RPC/OPC	50 nmole
StdTarget1	Single-strand DNA template	111	GAGTTCCTTGGCACCCGAGAATTCCA-174-bases-N	Integrated DNA Technologies	PAGE	4 nmole
StdTarget2	Single-strand DNA template	111	/5Phos/-176-bases-N-CGACTACGATCCGAACGCAGGAGC	Integrated DNA Technologies	PAGE	4 nmole
RandomBar3_std	Primer	115	TTCCCTACACGACGCTCTTCCGATCTNNNNNNNNCNNNNTNNNNANNNNGNNNNCTCACTGGACTGTCGAGGCTGAGCTCCTGCGTTCGGATCGTAGTC	Integrated DNA Technologies	PAGE	250 nmole
RandomBar3_std2	Primer	115	TTCCCTACACGACGCTCTTCCGATCTNNNNNNNNGNNNNANNNNTNNNNANNNNTGCACTGGACTGTCGAGGCTGAGCTCCTGCGTTCGGATCGTAGTC	Integrated DNA Technologies	PAGE	250 nmole
RandomBar3_std3	Primer	115	TTCCCTACACGACGCTCTTCCGATCTNNNNNNNNTNNNNCNNNNGNNNNCNNNNGACACTGGACTGTCGAGGCTGAGCTCCTGCGTTCGGATCGTAGTC	Integrated DNA Technologies	PAGE	250 nmole
RandomBar3_std4	Primer	115	TTCCCTACACGACGCTCTTCCGATCTNNNNNNNNANNNNGNNNNCNNNNTNNNNACCACTGGACTGTCGAGGCTGAGCTCCTGCGTTCGGATCGTAGTC	Integrated DNA Technologies	PAGE	250 nmole
Illu_SmallRNA_R2	Primer	128	CAAGCAGAAGACGGCATACGAGATGTGACTGGAGTTCCTTGGCACCCGAGAATTCCA	Integrated DNA Technologies	PAGE	100 nmole
IlluSeq 5_In&Out_NSE506	Primer	130	AATGATACGGCGACCACCGAGATCTACACACTGCATAACACTCTTTCCCTACACGACGCTCTTCCGATCT	Integrated DNA Technologies	PAGE	100 nmole
IlluSeq 5_In&Out_NSE501	Primer	130	AATGATACGGCGACCACCGAGATCTACACTAGATCGCACACTCTTTCCCTACACGACGCTCTTCCGATCT	Integrated DNA Technologies	PAGE	100 nmole
IlluSeq 5_In&Out_NSE502	Primer	130	AATGATACGGCGACCACCGAGATCTACACCTCTCTATACACTCTTTCCCTACACGACGCTCTTCCGATCT	Integrated DNA Technologies	PAGE	100 nmole
IlluSeq 5_In&Out_NSE505	Primer	130	AATGATACGGCGACCACCGAGATCTACACGTAAGGAGACACTCTTTCCCTACACGACGCTCTTCCGATCT	Integrated DNA Technologies	PAGE	100 nmole
I1_primer	Primer	178	CTGAGCTCCTGCGTTCGGATCGTAGTCG	Integrated DNA Technologies	PAGE	100 nmole
List of abbreviations
PAGE	Polyacrylamide gel electrophoresis
RPC	Reverse Phase Cartridge
OPC	Oligonucleotide Purification Cartridge
/5Phos/	5' phosphorylated oligonucleotides
/5Biosg/	5' biotinylated oligonucleotides
/iBiodT/	Biotinylated "T" oligomer
NNNN	Refer to any of A, T, C, or G
*"XXXXXXXX" in the primer P5-index-R1P-barcode-R should be replaced by the following indexes:
Index ID	Sequence (5'–3')
B01	TATAGCCT
B02	ATAGAGGC
B03	CCTATCCT
B04	GGCTCTGA
B05	AGGCGAAG
B06	TAATCTTA
B07	CAGGACGT
B08	GTACTGAC
B09	GCGAAGAT
B10	CCCTTGTG
B11	AGAATCAA
B12	GACTAACG
B13	CTCACATA
B14	AGCGCTAG
B15	GATATCGA
B16	CGCAGACG
B17	TATGAGTA
B18	AGGTGCGT
B19	GAACATAC
B20	ACATAGCG
B21	GTGCGATA
B22	CCAACAGA
B23	TTGGTGAG
B24	CGCGGTTC
B25	TATAACCT
B26	AAGGATGA
B27	TCGTGACC
B28	CTACAGTT
B29	ATATTCAC
B30	GCGCCTGT
B31	ACTCTATG
B32	GTCTCGCA
B33	AAGACGTC
B34	GGAGTACT
B35	ACCGGCCA
B36	GTTAATTG
B37	AACCGCGG
B38	CCAAGTCC
B39	TTGGACTT
B40	CAGTGGAT
B41	AACAGGAA
B42	GGTGAAGG
**These indexes were selected from Illumina indexes D501~D508 and UDI0001~UDI0096, and indexes J501~J508 listed in a paper (https://doi.org/10.1038/ncomms12338).
