# Supplementary material for: High-throughput identification and quantification of bacterial cells in the microbiota based on 16S rRNA sequencing with single-base accuracy using BarBIQ
Source: Springer Nature journal article supplement (doi:10.1038/s41596-023-00906-8), 2023-11-27
Supplement: MOESM4 [file 41596_2023_906_MOESM4_ESM12.xlsx]

## Sheet: Sheet1
Supplementary Table 2: 16S rRNA sequences of bacteria in mock community
Bar-sequence-ID	cOTU-ID	Sequence_I1(3'->5')	Sequence_R2(3'->5')	LINK	Mock-a	Mock-b	Mock-c	16S rRNA sequence-ID	Known 16S rRNA sequence(5'->3')	Strain ID
Bar-sequence-01	COTU-01	TGTTTGCTCCCCACGCTTTCGCACCTGAGCGTCAGTCTTCGTCCAGGGGGCCGCCTTCGCCACCGGTATTCCTCCAGATCTCTACGCATTTCACCGCTACACCTGGAATTCTACCCCCCTCTACGAGACTCAAGCTTGCCAGTATCAGATGCAGTTCCCAGGTTGAGCCCGGGGATTTCACATCTGACTTAACAAACCGCCTGCGTGCGC	ATTACCGCGGCTGCTGGCACGGAGTTAGCCGGTGCTTCTTCTGCGGGTAACGTCAATGAGCAAAGGTATTAACTTTACTCCCTTCCTCCCCGCTGAAAGTACTTTACAACCCGAAGGCCTTCTTCATACACGCGGCATGGCTGCATCAGGCTTGCGCCCATTGTGCAATATTCCCCA	I1R2	Detected	Detected	Detected	ATCC700926_A	TGGGGAATATTGCACAATGGGCGCAAGCCTGATGCAGCCATGCCGCGTGTATGAAGAAGGCCTTCGGGTTGTAAAGTACTTTCAGCGGGGAGGAAGGGAGTAAAGTTAATACCTTTGCTCATTGACGTTACCCGCAGAAGAAGCACCGGCTAACTCCGTGCCAGCAGCCGCGGTAATACGGAGGGTGCAAGCGTTAATCGGAATTACTGGGCGTAAAGCGCACGCAGGCGGTTTGTTAAGTCAGATGTGAAATCCCCGGGCTCAACCTGGGAACTGCATCTGATACTGGCAAGCTTGAGTCTCGTAGAGGGGGGTAGAATTCCAGGTGTAGCGGTGAAATGCGTAGAGATCTGGAGGAATACCGGTGGCGAAGGCGGCCCCCTGGACGAAGACTGACGC…	ATCC700926
Bar-sequence-02	COTU-02	TGTTTGATACCCACACTTTCGAGCATCAGCGTCAGTTACACTCCAGTGAGCTGCCTTCGCAATCGGAGTTCTTCGTGATATCTAAGCATTTCACCGCTACACCACGAATTCCGCCCACCTCTACTGCACTCAAGACTGCCAGTATCAACTGCAATTTTACGGTTGAGCCGCAAACTTTCACAACTGACTTAACAATCCGCCTACGCTCCC	TCCGTATTACCGCGGCTGCTGGCACGGAGTTAGCCGATCCTTATTCATATGGTACATACAAAAGTCCACACGTGGACCACTTTATTCCCATATAAAAGAAGTTTACAACCCATAGGGCAGTCATCCTTCACGCTACTTGGCTGGTTCAGACTCGCGTCCATTGACCAATATTCCTCA	I1R2	Detected	Detected	Detected	JCM9498_A	TGAGGAATATTGGTCAATGGACGCGAGTCTGAACCAGCCAAGTAGCGTGAAGGATGACTGCCCTATGGGTTGTAAACTTCTTTTATATGGGAATAAAGTGGTCCACGTGTGGACTTTTGTATGTACCATATGAATAAGGATCGGCTAACTCCGTGCCAGCAGCCGCGGTAATACGGAGGATCCGAGCGTTATCCGGATTTATTGGGTTTAAAGGGAGCGTAGGCGGATTGTTAAGTCAGTTGTGAAAGTTTGCGGCTCAACCGTAAAATTGCAGTTGATACTGGCAGTCTTGAGTGCAGTAGAGGTGGGCGGAATTCGTGGTGTAGCGGTGAAATGCTTAGATATCACGAAGAACTCCGATTGCGAAGGCAGCTCACTGGAGTGTAACTGACGCTGATG…	JCM9498
Bar-sequence-03	COTU-03	TGTTTGATACCCACACTTTCGAGCATCAGTGTCAGTTGCAGTCCAGTGAGCTGCCTTCGCAATCGGAGTTCTTCGTGATATCTAAGCATTTCACCGCTACACCACGAATTCCGCCCACCTCTACTGTACTCAAGACAGCCAGTATCAACTGCAATTTTACGGTTGAGCCGCAAACTTTCACAACTGACTTAACTGTCCACCTACGCTCCC	TCCGTATTACCGCGGCTGCTGGCACGGAGTTAGCCGATCCTTATTCATATGGTACATACAAAATTCCACACGTGGAAAACTTTATTCCCATATAAAAGAAGTTTACAACCCATAGGGCAGTCATCCTTCACGCTACTTGGCTGGTTCAGGCCTGCGCCCATTGACCAATATTCCTCA	I1R2	Detected	Detected	Detected	JCM5827_A	TGAGGAATATTGGTCAATGGGCGCAGGCCTGAACCAGCCAAGTAGCGTGAAGGATGACTGCCCTATGGGTTGTAAACTTCTTTTATATGGGAATAAAGTTTTCCACGTGTGGAATTTTGTATGTACCATATGAATAAGGATCGGCTAACTCCGTGCCAGCAGCCGCGGTAATACGGAGGATCCGAGCGTTATCCGGATTTATTGGGTTTAAAGGGAGCGTAGGTGGACAGTTAAGTCAGTTGTGAAAGTTTGCGGCTCAACCGTAAAATTGCAGTTGATACTGGCTGTCTTGAGTACAGTAGAGGTGGGCGGAATTCGTGGTGTAGCGGTGAAATGCTTAGATATCACGAAGAACTCCGATTGCGAAGGCAGCTCACTGGACTGCAACTGACACTGATG…	JCM5827
Bar-sequence-04		TGTTTGATACCCACACTTTCGAGCATCAGTGTCAGTTGCAGTCCAGTGAGCTGCCTTCGCAATCGGAGTTCTTCGTGATATCTAAGCATTTCACCGCTACACCACGAATTCCGCCCACCTCTACTGTACTCAAGACAGCCAGTATCAACTGCAATTTTACGGTTGAGCCGCAAACTTTCACAACTGACTTAACTGTCCACCTACGCTCCC	TCCGTATTACCGCGGCTGCTGGCACGGAGTTAGCCGATCCTTATTCATATGGTACATACAAAAATCCACACGTGGATCACTTTATTCCCATATAAAAGAAGTTTACAACCCATAGGGCAGTCATCCTTCACGCTACTTGGCTGGTTCAGACTCCCGTCCATTGACCAATATTCCTCA	I1R2	Detected	Detected	Detected	JCM5827_B	TGAGGAATATTGGTCAATGGACGGGAGTCTGAACCAGCCAAGTAGCGTGAAGGATGACTGCCCTATGGGTTGTAAACTTCTTTTATATGGGAATAAAGTGATCCACGTGTGGATTTTTGTATGTACCATATGAATAAGGATCGGCTAACTCCGTGCCAGCAGCCGCGGTAATACGGAGGATCCGAGCGTTATCCGGATTTATTGGGTTTAAAGGGAGCGTAGGTGGACAGTTAAGTCAGTTGTGAAAGTTTGCGGCTCAACCGTAAAATTGCAGTTGATACTGGCTGTCTTGAGTACAGTAGAGGTGGGCGGAATTCGTGGTGTAGCGGTGAAATGCTTAGATATCACGAAGAACTCCGATTGCGAAGGCAGCTCACTGGACTGCAACTGACACTGATG…
Bar-sequence-05	COTU-04	TGTTTGCTCCCCACGCTTTCGAGCCTCAGCGTCAGTTATCGTCCAGTAAGCCGCCTTCGCCACTGGTGTTCCTCCTAATATCTACGCATTTCACCGCTACACTAGGAATTCCGCTTACCCCTCCGACACTCTAGTACGACAGTTTCCAATGCAGTACCGGGGTTGAGCCCCGGGCTTTCACATCAGACTTGCCGCACCGCCTGCGCTCCC	TCCGGATAACGCTTGCACCATACGTATTACCGCGGCTGCTGGCACGTATTTAGCCGGTGCTTCTTAGTCAGGTACCGTCATTATCTTCCCTGCTGATAGAGCTTTACATACCGAAATACTTCTTCGCTCACGCGGCGTCGCTGCATCAGGCTTTCGCCCATTGTGCAATATTCCCCA	I1R2	Detected	Detected	Detected	JCM17463_A	TGGGGAATATTGCACAATGGGCGAAAGCCTGATGCAGCGACGCCGCGTGAGCGAAGAAGTATTTCGGTATGTAAAGCTCTATCAGCAGGGAAGATAATGACGGTACCTGACTAAGAAGCACCGGCTAAATACGTGCCAGCAGCCGCGGTAATACGTATGGTGCAAGCGTTATCCGGATTTACTGGGTGTAAAGGGAGCGCAGGCGGTGCGGCAAGTCTGATGTGAAAGCCCGGGGCTCAACCCCGGTACTGCATTGGAAACTGTCGTACTAGAGTGTCGGAGGGGTAAGCGGAATTCCTAGTGTAGCGGTGAAATGCGTAGATATTAGGAGGAACACCAGTGGCGAAGGCGGCTTACTGGACGATAACTGACGCTGAGGCTCGAAAGCGTGGGGAGCAA…	JCM17463
Bar-sequence-06		TGTTTGCTCCCCACGCTTTCGAGCCTCAGCGTCAGTTATCGTCCAGTAAGCCGCCTTCGCCACTGGTGTTCCTCCTAATATCTACGCATTTCACCGCTACACTAGGAATTCCGCTTGCCCCTCCGACACTCTAGTACGACAGTTTCCAATGCAGTACCGGGGTTGAGCCCCGGGCTTTCACATCAGACTTGCCGCACCGCCTGCGCTCCC	TCCGGATAACGCTTGCACCATACGTATTACCGCGGCTGCTGGCACGTATTTAGCCGGTGCTTCTTAGTCAGGTACCGTCATTATCTTCCCTGCTGATAGAGCTTTACATACCGAAATACTTCTTCGCTCACGCGGCGTCGCTGCATCAGGCTTTCGCCCATTGTGCAATATTCCCCA	I1R2	Detected	Detected	Detected	JCM17463_B	TGGGGAATATTGCACAATGGGCGAAAGCCTGATGCAGCGACGCCGCGTGAGCGAAGAAGTATTTCGGTATGTAAAGCTCTATCAGCAGGGAAGATAATGACGGTACCTGACTAAGAAGCACCGGCTAAATACGTGCCAGCAGCCGCGGTAATACGTATGGTGCAAGCGTTATCCGGATTTACTGGGTGTAAAGGGAGCGCAGGCGGTGCGGCAAGTCTGATGTGAAAGCCCGGGGCTCAACCCCGGTACTGCATTGGAAACTGTCGTACTAGAGTGTCGGAGGGGCAAGCGGAATTCCTAGTGTAGCGGTGAAATGCGTAGATATTAGGAGGAACACCAGTGGCGAAGGCGGCTTACTGGACGATAACTGACGCTGAGGCTCGAAAGCGTGGGGAGCAA…
Bar-sequence-07	COTU-05	TGTTTGCTCCCCACGCTTTCGCACCTCAGCGTCAATACCGGTCCAGGTGGCCGCCTTCGCCACTGATGTTCCTCCAGATATCTACGGATTTCACTCCTACACCTGGAATTCCGCCACCCTCTCCCGGATTCGAGTCGTGCAGTATCAAGGGCAGTTCCACGGTTGAGCCGTGGGCTTTCACCCCTGACTTACATAACAGCCTACGTGCGC	ATTACCGCGGCTGCTGGCACGGAGTTAGCCGGTGCTTCCTTTGAAGGTACCGTCAGTAGGATGATGATTAGAGCACCCTAGTTTCTTCCCTTCTGACAGAGGTTTACGATCCGAAGACCTTCATCCCTCACGCGGCGTCGCTGCGTCAGGCTTTCGCCCATTGCGCAATATTCCCCA	I1R2	Detected	Detected	Detected	ATCC29098_A	TGGGGAATATTGCGCAATGGGCGAAAGCCTGACGCAGCGACGCCGCGTGAGGGATGAAGGTCTTCGGATCGTAAACCTCTGTCAGAAGGGAAGAAACTAGGGTGCTCTAATCATCATCCTACTGACGGTACCTTCAAAGGAAGCACCGGCTAACTCCGTGCCAGCAGCCGCGGTAATACGGAGGGTGCAAGCGTTAATCGGAATCACTGGGCGTAAAGCGCACGTAGGCTGTTATGTAAGTCAGGGGTGAAAGCCCACGGCTCAACCGTGGAACTGCCCTTGATACTGCACGACTCGAATCCGGGAGAGGGTGGCGGAATTCCAGGTGTAGGAGTGAAATCCGTAGATATCTGGAGGAACATCAGTGGCGAAGGCGGCCACCTGGACCGGTATTGACGC…	ATCC29098
Bar-sequence-08		TGTTTGCTCCCCACGCTTTCGCACCTCAGCGTCAATACCGGTCCAGGTGGCCGCCTTCGCCACTGATGTTCCTCCAGATATCTACGGATTTCACTCCTACACCTGGAATTCCGCCACCCTCTCCCGGATTCGAGTCGTGCAGTATCAAGGGCAGTTCCACGGTTGAGCCGTGGGCTTTCACCCCTGACTTACATAACAGCCTACGTGCGC	ATTACCGCGGCTGCTGGCACGGAGTTAGCCGGTGCTTCCTTTGAAGGTACCGTCAGTAGGATGCTGATTAGAACACCCTAGTTTCTTCCCTTCTGACAGAGGTTTACGATCCGAAGACCTTCATCCCTCACGCGGCGTCGCTGCGTCAGGCTTTCGCCCATTGCGCAATATTCCCCA	I1R2	Detected	Detected	Detected	ATCC29098_B	TGGGGAATATTGCGCAATGGGCGAAAGCCTGACGCAGCGACGCCGCGTGAGGGATGAAGGTCTTCGGATCGTAAACCTCTGTCAGAAGGGAAGAAACTAGGGTGTTCTAATCAGCATCCTACTGACGGTACCTTCAAAGGAAGCACCGGCTAACTCCGTGCCAGCAGCCGCGGTAATACGGAGGGTGCAAGCGTTAATCGGAATCACTGGGCGTAAAGCGCACGTAGGCTGTTATGTAAGTCAGGGGTGAAAGCCCACGGCTCAACCGTGGAACTGCCCTTGATACTGCACGACTCGAATCCGGGAGAGGGTGGCGGAATTCCAGGTGTAGGAGTGAAATCCGTAGATATCTGGAGGAACATCAGTGGCGAAGGCGGCCACCTGGACCGGTATTGACGC…
Bar-sequence-09	COTU-06	TGTTCGCTCCCCCAGCTTTCGCGCCTCAGCGTCGGTCTCGGCCCAGAGGGCCGCCTTCGCCACCGGTGTTCCACCCGATATCTGCGCATTCCACCGCTACACCGGGTGTTCCACCCTCCCCTACCGGACCCAAGCCGCGGAGGTTCCGGGGGCTTCGGGGGGTTGAGCCCCCCGCTTCGACCCCCGGCCTGCCGGGCCGCCTACGCGCGC	CCGGATAACGCTCGCCCCCTACGTATTACCGCGGCTGCTGGCACGTAGTTAGCCGGGGCTTCTTCTGCAGGTACAGTCTTGACTCTTCCCTGCTGAAAGCGGTTTACGACCCGAAGGCCTCCGTCCCGCACGCGGCGTCGCTGCGTCAGGGTTCCCCCCATTGCGCAAGATTCCCCA	I1R2	Detected	Detected	Detected	JCM10188_A	TGGGGAATCTTGCGCAATGGGGGGAACCCTGACGCAGCGACGCCGCGTGCGGGACGGAGGCCTTCGGGTCGTAAACCGCTTTCAGCAGGGAAGAGTCAAGACTGTACCTGCAGAAGAAGCCCCGGCTAACTACGTGCCAGCAGCCGCGGTAATACGTAGGGGGCGAGCGTTATCCGGATTCATTGGGCGTAAAGCGCGCGTAGGCGGCCCGGCAGGCCGGGGGTCGAAGCGGGGGGCTCAACCCCCCGAAGCCCCCGGAACCTCCGCGGCTTGGGTCCGGTAGGGGAGGGTGGAACACCCGGTGTAGCGGTGGAATGCGCAGATATCGGGTGGAACACCGGTGGCGAAGGCGGCCCTCTGGGCCGAGACCGACGCTGAGGCGCGAAAGCTGGGGGAGCG…	JCM10188
Bar-sequence-10	COTU-07	TGTTTGCTCCCCACGCTTTCGAGCCTCAACGTCAGTTACCGTCCAGTAAGCCGCCTTCGCCACTGGTGTTCCTCCTGATATCTACGCATTTCACCGCTACACCAGGAATTCCGCTTACCTCTCCGGCACTCAAGCCATACAGTTTCCAATGCAGTCCGGGGGTTGAGCCCCCGCCTTTCACACCAGACTTGCATGGCCGTCTACGCTCCC	TCCGGATAACGCTTGCCCCCTACGTATTACCGCGGCTGCTGGCACGTAGTTAGCCGGGGCTTCTTGGTCAGGTACCGTCATTTTCTTCCCTGCTGATAGGGCTTTACATACCGAAATACTTCTTCACCCACGCGGCGTCGCTGCATCAGGGTTTCCCCCATTGTGCAATATTCCCCA	I1R2	Detected	Detected	Detected	DSM14469_A	TGGGGAATATTGCACAATGGGGGAAACCCTGATGCAGCGACGCCGCGTGGGTGAAGAAGTATTTCGGTATGTAAAGCCCTATCAGCAGGGAAGAAAATGACGGTACCTGACCAAGAAGCCCCGGCTAACTACGTGCCAGCAGCCGCGGTAATACGTAGGGGGCAAGCGTTATCCGGATTTACTGGGTGTAAAGGGAGCGTAGACGGCCATGCAAGTCTGGTGTGAAAGGCGGGGGCTCAACCCCCGGACTGCATTGGAAACTGTATGGCTTGAGTGCCGGAGAGGTAAGCGGAATTCCTGGTGTAGCGGTGAAATGCGTAGATATCAGGAGGAACACCAGTGGCGAAGGCGGCTTACTGGACGGTAACTGACGTTGAGGCTCGAAAGCGTGGGGAGCAA…	DSM14469
Bar-sequence-11	COTU-08	TGTTTGCTCCCCACGCTTTCGAGCCTCAACGTCAGTTATCGTCCAGTAAGTCGCCTTCGCCACTGGTGTTCCTCCTAATATCTACGCATTTCACCGCTACACTAGGAATTCCACTTACCTCTCCGACACTCCAGTTAAACAGTTTCCAAAGCAGTCCCGCAGTTGAGCCGCGGGCTTTCACTTCAGACTTGCTTTACCGTCTACGCTCCC	TCCGGATAACGCTTGCCCCCTACGTATTACCGCGGCTGCTGGCACGTAGTTAGCCGGGGCTTCTTAGTCAGGTACCGTCATTTTCTTCCCTGCTGATAGAGCTTTACATACCGAAATACTTCTTCACTCACGCGGCGTCGCTGCATCAGGCTTTCGCCCATTGTGCAATATTCCCCA	I1R2	Detected	Detected	Detected	JCM1297_A	TGGGGAATATTGCACAATGGGCGAAAGCCTGATGCAGCGACGCCGCGTGAGTGAAGAAGTATTTCGGTATGTAAAGCTCTATCAGCAGGGAAGAAAATGACGGTACCTGACTAAGAAGCCCCGGCTAACTACGTGCCAGCAGCCGCGGTAATACGTAGGGGGCAAGCGTTATCCGGATTTACTGGGTGTAAAGGGAGCGTAGACGGTAAAGCAAGTCTGAAGTGAAAGCCCGCGGCTCAACTGCGGGACTGCTTTGGAAACTGTTTAACTGGAGTGTCGGAGAGGTAAGTGGAATTCCTAGTGTAGCGGTGAAATGCGTAGATATTAGGAGGAACACCAGTGGCGAAGGCGACTTACTGGACGATAACTGACGTTGAGGCTCGAAAGCGTGGGGAGCAA…	JCM1297
Bar-sequence-12		TGTTTGCTCCCCACGCTTTCGAGCCTCAACGTCAGTTATCGTCCAGTAAGTCGCCTTCGCCACTGGTGTTCCTCCTAATATCTACGCATTTCACCGCTACACTAGGAATTCCACTTACCTCTCCGACACTCCAGTTAAACAGTTTCCAAAGCAGTCCCGCAGTTGAGCCGCGGGCTTTCACTTCAGACTTGCTTTACCGTCTACGCTCCC	TCCGGATAACGCTTGCCCCCTACGTATTACCGCGGCTGCTGGCACGTAGTTAGCCGGGGCTTCTTAGTCAGGTACCGTCATTTTCTTCCCTGCTGATAGAGTTTTACATACCGAAATACTTCTTCACTCACGCGGCGTCGCTGCATCAGGCTTTCGCCCATTGTGCAATATTCCCCA	I1R2	Detected	Detected	Detected	JCM1297_B	TGGGGAATATTGCACAATGGGCGAAAGCCTGATGCAGCGACGCCGCGTGAGTGAAGAAGTATTTCGGTATGTAAAACTCTATCAGCAGGGAAGAAAATGACGGTACCTGACTAAGAAGCCCCGGCTAACTACGTGCCAGCAGCCGCGGTAATACGTAGGGGGCAAGCGTTATCCGGATTTACTGGGTGTAAAGGGAGCGTAGACGGTAAAGCAAGTCTGAAGTGAAAGCCCGCGGCTCAACTGCGGGACTGCTTTGGAAACTGTTTAACTGGAGTGTCGGAGAGGTAAGTGGAATTCCTAGTGTAGCGGTGAAATGCGTAGATATTAGGAGGAACACCAGTGGCGAAGGCGACTTACTGGACGATAACTGACGTTGAGGCTCGAAAGCGTGGGGAGCAA…
Bar-sequence-13	COTU-09	TGTTTGATACCCACACTTTCGAGCATCAGTGTCAGTAACAGTCTAGTGAGCTGCCTTCGCAATCGGAGTTCTTCGTGATATCTAAGCATTTCACCGCTACACCACGAATTCCGCCCACCTCTACTGTACTCAAGACTGCCAGTTTCAACTGCAATTTTACGGTTGAGCCGCAAACTTTCACAACTGACTTAACAATCCACCTACGCTCCC	TCCGTATTACCGCGGCTGCTGGCACGGAGTTAGCCGATCCTTATTCATATGGTACATACAAAATTCCACACGTGGAAAACTTTATTCCCATATAAAAGAAGTTTACGACCCATAGAGCCTTCATCCTTCACGCTACTTGGCTGGTTCAGGCTCTCGCCCATTGACCAATATTCCTCA	I1R2	Detected	Detected	Detected	JCM5824_A	TGAGGAATATTGGTCAATGGGCGAGAGCCTGAACCAGCCAAGTAGCGTGAAGGATGAAGGCTCTATGGGTCGTAAACTTCTTTTATATGGGAATAAAGTTTTCCACGTGTGGAATTTTGTATGTACCATATGAATAAGGATCGGCTAACTCCGTGCCAGCAGCCGCGGTAATACGGAGGATCCGAGCGTTATCCGGATTTATTGGGTTTAAAGGGAGCGTAGGTGGATTGTTAAGTCAGTTGTGAAAGTTTGCGGCTCAACCGTAAAATTGCAGTTGAAACTGGCAGTCTTGAGTACAGTAGAGGTGGGCGGAATTCGTGGTGTAGCGGTGAAATGCTTAGATATCACGAAGAACTCCGATTGCGAAGGCAGCTCACTAGACTGTTACTGACACTGATG…	JCM5824
Bar-sequence-14		TGTTTGATACCCACACTTTCGAGCATCAGTGTCAGTAACAGTCTAGTGAGCTGCCTTCGCAATCGGAGTTCTTCGTGATATCTAAGCATTTCACCGCTACACCACGAATTCCGCCCACCTCTACTGTACTCAAGACTGCCAGTTTCAACTGCAATTTTACGGTTGAGCCGCAAACTTTCACAACTGACTTAACAATCCACCTACGCTCCC	TCCGTATTACCGCGGCTGCTGGCACGGAGTTAGCCGATCCTTATTCATATGGTACATACAAAATTCCACACGTGGAAAACTTTATTCCCATATAAAAGAAGTTTACGACCCATAGAGCCTTCATCCTTCACGCTACTTGGCTGGTTCAGGCCTGCGCCCATTGACCAATATTCCTCA	I1R2	Detected	Detected	Detected	JCM5824_B	TGAGGAATATTGGTCAATGGGCGCAGGCCTGAACCAGCCAAGTAGCGTGAAGGATGAAGGCTCTATGGGTCGTAAACTTCTTTTATATGGGAATAAAGTTTTCCACGTGTGGAATTTTGTATGTACCATATGAATAAGGATCGGCTAACTCCGTGCCAGCAGCCGCGGTAATACGGAGGATCCGAGCGTTATCCGGATTTATTGGGTTTAAAGGGAGCGTAGGTGGATTGTTAAGTCAGTTGTGAAAGTTTGCGGCTCAACCGTAAAATTGCAGTTGAAACTGGCAGTCTTGAGTACAGTAGAGGTGGGCGGAATTCGTGGTGTAGCGGTGAAATGCTTAGATATCACGAAGAACTCCGATTGCGAAGGCAGCTCACTAGACTGTTACTGACACTGATG…
Bar-sequence-15		TGTTTGATACCCACACTTTCGAGCATCAGTGTCAGTTGCAGTCTAGTGAGCTGCCTTCGCAATCGGAGTTCTTCGTGATATCTAAGCATTTCACCGCTACACCACGAATTCCGCCCACCTCTACTGTACTCAAGACTGCCAGTTTCAACTGCAATTTTACGGTTGAGCCGCAAACTTTCACAACTGACTTAACAATCCACCTACGCTCCC	TCCGTATTACCGCGGCTGCTGGCACGGAGTTAGCCGATCCTTATTCATATGGTACATACAAAATCCCACACGTGGAACACTTTATTCCCATATAAAAGAAGTTTACAACCCATAGGGCAGTCATCCTTCACGCTACTTGGCTGGTTCAGACTCTCGTCCATTGACCAATATTCCTCA	I1R2	Detected	Detected	Detected	JCM5824_C	TGAGGAATATTGGTCAATGGACGAGAGTCTGAACCAGCCAAGTAGCGTGAAGGATGACTGCCCTATGGGTTGTAAACTTCTTTTATATGGGAATAAAGTGTTCCACGTGTGGGATTTTGTATGTACCATATGAATAAGGATCGGCTAACTCCGTGCCAGCAGCCGCGGTAATACGGAGGATCCGAGCGTTATCCGGATTTATTGGGTTTAAAGGGAGCGTAGGTGGATTGTTAAGTCAGTTGTGAAAGTTTGCGGCTCAACCGTAAAATTGCAGTTGAAACTGGCAGTCTTGAGTACAGTAGAGGTGGGCGGAATTCGTGGTGTAGCGGTGAAATGCTTAGATATCACGAAGAACTCCGATTGCGAAGGCAGCTCACTAGACTGCAACTGACACTGATG…
Bar-sequence-16	COTU-10	TGTTTGCTCCCCACGCTTTCGAGCCTCAACGTCAGTTACCGTCCAGCAGGCCGCCTTCGCCACTGGTGTTCCTCCTAATATCTACGCATTTCACCGCTACACTAGGAATTCCGCTTGCCTCTCCGGCACTCAAGTCTGACAGTTTCCAATGCAGTCCACAGGTTGAGCCCATGCCTTTCACATCAGACTTGCCAAACCGTCTACGCTCCC	TCCGGATAACGCTTGCCCCTTACGTATTACCGCGGCTGCTGGCACGTAATTAGCCGGGGCTTCTTAGTCAGGTACCGTCACTTTCTTCCCTGCTGATAGAAGTTTACATACCGAGATACTTCTTCCTTCACGCGGCGTCGCTGCATCAGGGTTTCCCCCATTGTGCAATATTCCCCA	I1R2	Detected	Detected	Detected	JCM14656_A	TGGGGAATATTGCACAATGGGGGAAACCCTGATGCAGCGACGCCGCGTGAAGGAAGAAGTATCTCGGTATGTAAACTTCTATCAGCAGGGAAGAAAGTGACGGTACCTGACTAAGAAGCCCCGGCTAATTACGTGCCAGCAGCCGCGGTAATACGTAAGGGGCAAGCGTTATCCGGATTTACTGGGTGTAAAGGGAGCGTAGACGGTTTGGCAAGTCTGATGTGAAAGGCATGGGCTCAACCTGTGGACTGCATTGGAAACTGTCAGACTTGAGTGCCGGAGAGGCAAGCGGAATTCCTAGTGTAGCGGTGAAATGCGTAGATATTAGGAGGAACACCAGTGGCGAAGGCGGCCTGCTGGACGGTAACTGACGTTGAGGCTCGAAAGCGTGGGGAGCAA…	JCM14656
Legend
Bar-sequence-ID	ID for each Bar sequence.
cOTU-ID	ID for each cell-based operational taxonomy unit (cOTU). If the Bar sequence was not detected in the cell samples (see Main), it was not defined as cOTU and the ID in this column is the same as the column "Bar-sequence-ID".
Sequence_I1(3'->5')	Seqeunce of Bar sequence identified by I1 reads.
Sequence_R2(3'->5')	Seqeunce of Bar sequence identified by R2 reads.
LINK	"I1R2" indicates I1 and R2 are not overlapped.
Mock-a, Mock-b, Mock-c	Three independent measurements for the mock community.
16S rRNA sequence-ID	The ID of the matched known 16S rRNA sequence of the given Bar sequence.
Known 16S rRNA sequence(5'->3')	The 16S rRNA sequences were determined by Sanger sequencing in our previously published study [Jin, J. et al. High-throughput identification and quantification of single bacterial cells in the microbiota. Nat Commun 13, 863 (2022)].
Strain ID	The ID of the strain.
* The contents of this table are also presented in our previously published study [Jin, J. et al. High-throughput identification and quantification of single bacterial cells in the microbiota. Nat Commun 13, 863 (2022)].
