# Supplementary material for: High-throughput identification and quantification of bacterial cells in the microbiota based on 16S rRNA sequencing with single-base accuracy using BarBIQ
Source: Springer Nature journal article supplement (doi:10.1038/s41596-023-00906-8), 2023-11-27
Supplement: MOESM5 [file 41596_2023_906_MOESM5_ESM13.xlsx]

## Sheet: Sheet1
Supplementary Table 3: Quantification of bacteria in mock community.
Strain ID	Bacterium name	Designed abundance (cells/µl)	cOTU-ID	Cell count (Mock-a)	Cell count (Mock-b)	Cell count (Mock-c)	Mean	Standard deviation	BarBIQ-determined absolute abundance (cells/µl)	Standard deviation (Absolute)	Standard deviation/Mean (Absolute)
ATCC700926	Escherichia coli	1.0±0.2*104	COTU-01	4814.66	4918	4854.92	4862.53	52.0869	1.63*104	0.02*104	0.0107119
JCM9498	Bacteroides caccae	3.7±1.1*104	COTU-02	9639.12	10181	10352.5	10057.5	372.383	3.36*104	0.12*104	0.0370252
JCM5827	Bacteroides thetaiotaomicron	3.8±1.1*104	COTU-03	7711.62	7461	7458.83	7543.82	145.328	2.52*104	0.05*104	0.0192645
JCM17463	Agathobacter rectalis (Eubacterium rectale)	7.2±2.9*103	COTU-04	5185.15	4773	4796.11	4918.08	231.572	1.64*104	0.08*104	0.0470857
ATCC29098	Desulfovibrio piger	1.6±0.5*103	COTU-05	517.372	555	476.937	516.436	39.0399	1.73*103	0.13*103	0.0755947
JCM10188	Collinsella aerofaciens	7.8±2.7*102	COTU-06	132.199	138	125.116	131.772	6.45274	4.40*102	0.22*102	0.0489691
DSM14469	Marvinbryantia formatexigens	1.6±0.7*102	COTU-07	21.2172	20	13.9018	18.373	3.91972	6.14*10	1.30*10	0.213342
JCM1297	Clostridium symbiosum	5.5±2.3*102	COTU-08	78.3403	111	108.006	99.1154	18.054	3.31*102	0.60*102	0.182151
JCM5824	Bacteroides ovatus	3.3±1.3*102	COTU-09	73.444	60	43.844	59.096	14.8207	1.98*102	0.50*102	0.25079
JCM14656	Blautia hydrogenotrophica	1.3±0.5*102	COTU-10	39.1701	31	34.2197	34.7966	4.11551	1.16*102	0.14*102	0.118273
Legend
Strain ID	The ten strains used for preparation of the mock community.
Designed abundance	The cell abundance per unit volume (mean ± s.d., n = 5, cells/µl) in the mock community according to the microscopic imaging measurements for each strain.
cOTU-ID	ID of cOTU.
Mock-a, Mock-b, Mock-c	Three independent measurements for the mock community.
BarBIQ-determined absolute abundance	Obtained by normalizing the sequencing-determined cell counts using the absolute total cell abundance (94,400 ± 7,200 cells/µl, mean ± standard diviation, n = 4) of the mock community measured by droplet digital PCR.
* The contents of this table are also presented in our previously published study [Jin, J. et al. High-throughput identification and quantification of single bacterial cells in the microbiota. Nat Commun 13, 863 (2022)].
