# Supplementary material for: High-throughput identification and quantification of bacterial cells in the microbiota based on 16S rRNA sequencing with single-base accuracy using BarBIQ
Source: Springer Nature journal article supplement (doi:10.1038/s41596-023-00906-8), 2023-11-27
Supplement: MOESM7 [file 41596_2023_906_MOESM7_ESM15.xlsx]

## Sheet: Read_me
Supplementary Table 5: Quantification of bacteria in cecal samples.
Title for sheets
Sequencing-determined counts:	Count of each cOTU determined by sequenceing of all cecal samples including technical replicates.
Absolute total abundance:	Absolute total abudances of all cecal samples including technical replicates.
Absolute abundance:	Absolute abundance per weight mg of each cOTU of all cecal samples including technical replicates.
Legend
cOTU-ID	ID of cOTU.
No_of_Bar-sequences	Number of Bar sequences in the given cOTU.
Kingdom/Phylum/Class/Order/Family/Genus	Taxonomies of each cOTU; the taxonomies of each Bar sequence in the given cOTU were predicted by RDP Classifier; the highest scored prediction (score shown in parentheses) of all Bar sequences in the given cOTU was chosen to be the prediction of the cOTU.
* The contents of this table are also presented in our previously published study [Jin, J. et al. High-throughput identification and quantification of single bacterial cells in the microbiota. Nat Commun 13, 863 (2022)].

## Sheet: Sequencing-determined counts
Title: Count of each cOTU determined by sequenceing of all cecal samples including technical replicates.
cOTU-ID	VDadist	VDaprox	VDbdist	VDbprox	VDcdist	VDcprox	VDddist	VDdprox	VSadist	VSaprox	VSbdist	VSbprox	VScdist	VScprox	VSddist	VSdprox	VDadist-ecDNA	VDaprox-ecDNA	VDbdist-ecDNA	VDbprox-ecDNA	VDcdist-ecDNA	VDcprox-ecDNA	VDddist-ecDNA	VDdprox-ecDNA	VSadist-ecDNA	VSaprox-ecDNA	VSbdist-ecDNA	VSbprox-ecDNA	VScdist-ecDNA	VScprox-ecDNA	VSddist-ecDNA	VSdprox-ecDNA	CEadist1	CEadist2	CEadist3	CEaprox1	CEaprox2	CEaprox3	CEbdist	CEbprox	CEcdist	CEcprox	CEadist1-ecDNA	CEadist2-ecDNA	CEadist3-ecDNA	CEaprox1-ecDNA	CEaprox2-ecDNA	CEaprox3-ecDNA	CEbdist-ecDNA
COTU-CM-0001	0	0	0	0	0	0	0	0	0	0	0	0	0	0	0	0	0	0	0	0	0	0	0	0	0	0	0	0	0	0	0	0	5	3	6	0	2	2	17	6	10	5	1	0	0	0	0	0	5
COTU-CM-0004	11	14	14	5	12	3	9	13	5	10	17	52	27	15	16	16	4	3	2	7	1	1	4	17	3	12	3	2	2	9	5	5	0	0	0	0	0	0	0	0	0	1	0	0	0	0	0	0	0
COTU-CM-0005	0	0	0	0	0	0	0	0	0	0	0	0	0	0	0	0	0	0	0	0	0	0	0	0	0	0	0	0	0	0	0	0	21	18	17	14	4	7	25	8	26	26	0	0	0	0	0	0	0
COTU-CM-0006	0	0	0	0	0	0	0	0	0	0	0	0	0	0	0	0	0	0	0	0	0	0	0	0	0	0	0	0	0	0	0	0	8	10	7	5	1	14	6	6	14	31	0	0	0	0	0	1	0
COTU-CM-0007	0	0	0	0	0	0	7	5	0	0	2	0	0	0	0	0	0	0	0	0	0	0	4	3	0	0	0	0	0	0	0	0	13	4	8	4	1	5	27	16	8	12	0	0	0	0	0	0	0
COTU-CM-0008	0	1	0	0	0	0	5	1	0	0	0	0	0	0	0	0	0	0	0	0	0	0	0	3	0	0	0	0	0	0	0	0	0	6	0	2	0	2	2	1	2	4	0	0	0	0	0	0	0
COTU-CM-0009	0	0	0	0	0	0	0	0	0	0	0	0	0	8	0	0	0	0	0	0	0	0	0	0	0	0	0	0	0	0	0	0	0	0	0	0	0	0	0	0	0	0	0	0	0	0	0	0	0
COTU-CM-0010	59	84	38	50	41	28	143	119	229	157	68	96	55	89	275	128	9	30	0	9	1	4	54	29	35	39	9	8	54	14	46	25	120	109	109	69	41	95	2	0	6	0	1	0	0	3	2	5	0
COTU-CM-0011	0	0	0	0	0	0	0	0	1	0	0	0	0	0	6	0	0	0	0	0	0	0	0	0	0	0	0	0	0	0	0	0	0	0	0	0	0	0	0	0	0	0	0	0	0	0	0	0	0
COTU-CM-0012	0	0	0	0	0	0	0	0	0	0	0	0	0	0	0	0	0	0	0	0	0	0	0	0	0	0	0	0	0	0	0	0	0	0	0	0	0	0	7	0	0	0	0	0	0	0	0	0	0
COTU-CM-0013	13	6	2	4	0	1	1	4	1	0	0	0	0	0	0	0	1	3	1	1	0	0	2	1	0	0	0	0	0	0	0	0	0	0	0	0	0	0	0	0	0	0	0	0	0	0	0	0	0
COTU-CM-0014	410	369	50	80	68	81	232	232	191	399	103	92	49	137	42	39	99	86	0	23	12	18	85	85	69	39	29	0	20	49	0	23	1	2	0	2	0	0	0	0	0	0	0	0	0	0	0	0	0
COTU-CM-0015	29	25	2	7	7	6	11	19	12	14	11	5	1	8	1	1	7	5	0	1	2	0	3	5	2	3	0	0	0	3	0	0	0	0	0	0	0	0	0	0	0	0	0	0	0	0	0	0	0
COTU-CM-0016	0	0	0	0	0	0	0	0	0	0	0	0	0	0	0	0	0	0	0	0	0	0	0	0	0	0	0	0	0	0	0	0	1	0	0	0	0	0	20	18	3	5	0	0	0	0	0	0	0
COTU-CM-0017	0	0	0	0	0	0	0	0	0	0	0	0	0	0	0	0	0	0	0	0	0	0	0	0	0	0	0	0	0	0	0	0	14	16	10	3	1	3	0	0	13	0	0	0	0	2	1	1	0
COTU-CM-0018	0	0	0	0	0	0	0	0	0	0	0	0	0	0	0	0	0	0	0	0	0	0	0	0	0	0	0	0	0	0	0	0	6	4	6	5	0	1	0	0	11	11	1	0	0	1	0	0	0
COTU-CM-0020	0	0	0	0	0	0	0	0	0	0	0	0	0	0	0	0	0	0	0	0	0	0	0	0	0	0	0	0	0	0	0	21	0	0	0	0	0	0	0	0	0	0	0	0	0	0	0	0	0
COTU-CM-0021	0	0	0	0	0	0	0	0	0	0	0	0	0	0	0	0	0	0	0	0	0	0	0	0	0	0	0	0	0	0	14	0	0	0	0	0	0	0	0	0	0	0	0	0	0	0	0	0	0
COTU-CM-0022	0	0	0	0	0	0	0	0	0	0	0	0	0	0	0	0	0	0	0	0	0	0	0	0	0	0	0	8	0	0	0	0	0	0	0	0	0	0	0	0	0	0	0	0	0	0	0	0	0
COTU-CM-0023	0	0	0	0	0	0	0	0	19	4	59	21	1	3	0	0	0	0	0	0	0	0	0	0	4	2	10	19	0	1	0	0	57	51	58	22	15	16	51	17	18	7	0	0	0	1	2	3	0
COTU-CM-0024	0	0	0	0	0	0	0	0	0	0	0	0	0	0	0	0	0	0	0	0	0	0	0	0	0	0	0	0	0	0	0	0	2	6	8	0	1	1	11	3	1	1	0	0	0	0	0	0	0
COTU-CM-0025	0	0	0	0	0	0	0	0	14	11	52	22	1	5	0	0	0	0	0	0	0	0	0	0	0	8	24	15	2	0	0	0	714	637	612	220	103	284	592	162	287	104	1	1	2	17	36	17	2
COTU-CM-0026	0	0	0	0	0	0	0	0	0	0	0	0	0	0	0	0	0	0	0	0	0	0	0	0	0	0	0	0	0	0	0	0	87	75	88	110	34	111	108	67	46	45	0	0	6	0	0	0	0
COTU-CM-0031	4	3	2	9	0	0	0	0	0	0	0	0	0	0	41	18	0	0	0	14	0	0	0	1	0	0	0	0	0	0	4	23	0	0	0	0	0	0	0	0	0	0	0	0	0	0	0	0	0
COTU-CM-0033	4	3	2	7	6	6	11	6	1	0	4	2	2	0	3	0	3	5	2	35	8	5	6	5	1	0	6	26	0	1	4	3	0	0	0	0	0	0	0	0	0	0	0	0	0	0	0	0	0
COTU-CM-0034	0	0	0	0	7	0	0	0	0	0	0	0	0	0	0	0	0	0	0	0	0	0	0	0	0	0	0	0	0	0	0	0	0	0	0	0	0	0	0	0	0	0	0	0	0	0	0	0	0
COTU-CM-0035	2	3	4	7	9	3	12	7	0	0	12	2	2	1	2	0	2	7	6	32	19	15	13	4	0	0	6	15	1	2	1	1	0	0	0	0	0	0	0	0	0	0	0	0	0	0	0	0	0
COTU-CM-0036	0	0	0	0	0	0	0	0	0	0	0	0	0	0	0	0	0	0	0	0	0	0	0	0	0	0	0	1	0	0	0	0	0	2	2	2	0	3	18	1	5	1	0	0	0	0	0	0	0
COTU-CM-0037	9	14	4	18	9	10	8	9	0	5	4	6	8	4	3	1	1	10	3	21	4	5	2	3	0	0	3	3	5	6	0	5	7	8	7	6	4	11	23	8	2	2	0	0	0	0	0	0	0
COTU-CM-0038	10	23	16	32	26	25	12	17	5	1	8	7	7	8	15	12	4	17	1	43	10	11	16	7	1	7	7	4	3	2	4	8	4	0	10	9	2	7	15	3	5	3	0	0	0	0	0	0	0
COTU-CM-0039	0	0	0	0	0	0	0	0	0	0	0	0	0	1	0	0	0	0	0	0	0	0	0	0	0	0	0	0	0	0	0	0	567	596	582	286	159	456	567	132	251	129	11	16	20	22	25	6	22
COTU-CM-0040	0	0	0	0	0	0	0	0	0	0	0	0	1	2	1	0	0	0	0	0	0	0	0	0	0	0	0	0	0	0	0	0	22	19	18	28	5	16	45	20	10	3	0	0	0	0	0	0	0
COTU-CM-0041	1	2	7	19	13	9	1	6	4	2	6	3	2	11	5	4	1	5	2	19	4	2	4	7	0	1	1	8	2	3	0	2	0	0	0	0	0	0	0	0	0	0	0	0	0	0	0	0	0
COTU-CM-0042	11	4	3	4	4	4	6	1	0	0	0	0	2	1	2	1	1	3	0	4	0	0	0	0	0	0	0	0	1	1	0	1	11	14	22	17	5	6	33	15	14	11	0	0	0	0	0	0	0
COTU-CM-0043	41	50	20	24	66	35	17	30	26	25	65	9	80	99	206	75	25	22	12	53	17	16	10	30	11	28	37	12	82	41	65	185	0	0	0	0	0	0	0	0	0	0	0	0	0	0	0	0	0
COTU-CM-0046	0	0	0	0	0	0	0	0	0	0	0	0	0	0	0	0	0	0	0	0	0	0	0	0	0	0	0	0	0	0	0	0	64	53	49	29	16	47	80	22	36	15	0	1	0	0	1	0	0
COTU-CM-0049	0	0	0	0	0	0	0	0	0	0	0	0	0	0	0	0	0	0	0	0	0	0	0	0	0	0	0	0	0	0	0	0	22	15	18	24	10	25	13	3	3	8	0	0	0	0	0	0	0
COTU-CM-0051	0	0	0	0	0	0	0	0	0	0	0	0	0	0	0	0	0	0	0	0	0	0	0	0	0	0	0	0	0	0	0	0	4	5	2	4	1	9	1	0	2	4	0	0	0	0	0	0	0
COTU-CM-0056	0	0	0	0	0	0	0	0	0	0	0	0	0	0	0	0	0	0	0	0	0	0	0	0	0	0	0	14	0	0	0	0	0	0	0	0	0	0	0	0	0	0	0	0	0	0	0	0	0
COTU-CM-0057	5	5	1	1	10	4	1	7	9	2	12	3	0	4	5	2	3	3	2	6	3	1	2	2	1	1	2	0	0	1	0	2	0	0	0	0	0	0	0	0	0	0	0	0	0	0	0	0	0
COTU-CM-0058	21	13	15	5	16	17	19	24	19	8	23	10	6	6	12	2	6	13	4	2	6	5	12	10	0	1	6	8	3	2	1	5	0	0	0	0	0	0	0	0	0	0	0	0	0	0	0	0	0
COTU-CM-0059	3	5	0	0	3	4	2	4	0	0	4	2	2	0	0	0	5	5	0	5	0	0	8	11	0	1	0	0	0	0	0	1	0	0	0	0	0	0	0	0	0	0	0	0	0	0	0	0	0
COTU-CM-0060	10	4	5	2	4	4	9	13	1	2	10	4	0	3	10	0	10	16	2	6	6	1	13	10	0	2	17	0	1	0	2	1	0	0	0	0	0	0	0	0	0	0	0	0	0	0	0	0	0
COTU-CM-0061	0	0	0	0	0	0	0	0	0	0	0	0	0	0	0	0	0	0	0	0	0	0	0	0	0	0	0	0	0	0	0	0	27	32	22	19	13	16	33	9	13	7	0	0	0	0	1	0	0
COTU-CM-0063	0	0	0	0	0	0	0	0	0	0	0	0	0	0	0	0	0	0	0	0	0	0	0	0	0	0	0	0	0	0	0	0	12	7	9	6	4	13	2	1	2	4	0	0	0	0	1	0	0
COTU-CM-0064	7	10	0	1	0	0	0	0	0	0	0	0	0	0	0	0	2	3	1	2	0	0	0	0	0	0	0	0	0	0	0	0	0	0	0	0	0	0	0	0	1	0	0	0	0	0	0	0	0
COTU-CM-0065	0	0	1	2	0	0	1	7	0	0	0	0	0	0	0	0	0	0	0	0	0	0	0	1	1	0	0	1	0	0	0	0	0	0	0	0	0	0	0	0	0	0	0	0	0	0	0	0	0
COTU-CM-0066	0	0	0	0	0	0	0	0	0	0	0	8	0	0	0	0	0	0	0	0	0	0	0	0	0	0	0	0	0	0	0	0	0	0	0	0	0	0	0	0	0	0	0	0	0	0	0	0	0
COTU-CM-0069	0	0	0	0	0	0	0	0	0	0	0	0	0	0	0	0	0	0	0	0	0	0	0	8	0	0	0	0	0	0	0	0	0	0	0	0	0	0	0	0	0	0	0	0	0	0	0	0	0
COTU-CM-0070	0	0	0	0	0	0	0	0	1	0	0	0	1	0	0	1	0	0	0	0	0	0	0	0	0	0	0	0	0	0	0	9	0	0	0	0	0	0	0	0	0	0	0	0	0	0	0	0	0
COTU-CM-0071	0	0	0	0	0	0	0	0	0	0	0	0	0	0	0	0	0	0	0	0	0	0	0	12	0	0	0	0	0	0	0	0	0	0	0	0	0	0	0	0	0	0	0	0	0	0	0	0	0
COTU-CM-0072	39	48	13	39	72	24	129	88	28	6	100	39	14	29	40	5	44	47	35	64	42	25	92	112	10	11	60	41	19	10	16	44	506	449	448	209	88	215	600	148	144	63	0	14	1	7	11	2	4
COTU-CM-0073	0	0	0	0	0	0	1	0	1	0	0	0	0	0	0	0	0	9	0	0	0	0	0	0	0	0	0	0	0	0	0	0	1	0	0	0	0	0	0	0	1	0	0	0	0	0	0	0	0
COTU-CM-0074	63	88	46	52	80	26	146	115	28	13	106	30	9	28	41	9	65	76	59	137	76	39	134	140	11	27	56	71	10	7	17	37	162	122	157	70	22	60	182	55	38	22	3	0	0	1	1	0	1
COTU-CM-0075	0	0	0	0	0	0	0	0	0	0	0	0	0	0	0	0	0	0	0	0	0	0	0	0	0	0	0	0	0	0	0	0	1	4	4	1	0	0	2	0	5	2	0	0	0	0	0	0	0
COTU-CM-0076	0	0	0	0	0	0	0	0	0	0	0	0	0	0	0	0	0	0	0	0	0	0	0	0	0	0	0	0	0	0	0	0	267	200	241	91	44	120	320	69	128	36	0	1	2	1	2	2	0
COTU-CM-0077	0	0	0	0	0	0	0	0	0	0	0	0	0	0	0	0	0	0	0	0	0	0	0	0	0	0	0	0	0	0	0	0	980	971	984	492	196	592	1343	320	607	231	0	5	1	5	11	3	6
COTU-CM-0080	0	0	0	0	0	0	0	0	0	0	0	0	0	0	0	0	0	0	0	0	0	0	0	0	0	0	0	0	0	0	0	0	4	3	3	4	4	6	5	1	3	1	0	0	0	0	0	0	0
COTU-CM-0086	0	0	0	0	0	0	0	6	0	0	0	0	0	0	0	0	0	0	0	0	0	0	0	0	0	0	0	0	0	0	0	0	0	0	0	0	0	0	0	0	0	0	0	0	0	0	0	0	0
COTU-CM-0087	0	0	0	0	0	0	0	10	0	0	0	0	0	0	0	0	0	0	0	0	0	0	0	0	0	0	0	0	0	0	0	0	0	0	0	0	0	0	0	0	0	0	0	0	0	0	0	0	0
COTU-CM-0089	0	1	0	0	0	0	7	1	0	0	0	0	0	0	0	0	0	0	0	0	0	0	0	0	0	0	0	0	0	0	0	0	0	0	1	0	0	0	0	0	0	0	0	0	0	0	0	0	0
COTU-CM-0093	0	0	0	0	0	0	0	0	0	0	0	0	0	0	0	0	0	0	0	0	0	0	6	0	0	0	0	0	0	0	0	0	0	0	0	0	0	0	0	0	0	0	0	0	0	0	0	0	0
COTU-CM-0094	0	0	4	3	0	2	2	5	1	0	3	2	0	1	2	0	2	1	2	8	0	0	1	5	4	0	0	0	0	0	0	0	0	0	0	0	0	0	0	0	0	0	0	0	0	0	0	0	0
COTU-CM-0095	4	5	25	10	15	4	13	12	1	2	10	8	0	2	3	0	4	8	2	9	2	2	7	8	1	5	2	2	0	2	0	0	0	0	0	0	0	0	0	0	0	0	0	0	0	0	0	0	0
COTU-CM-0096	0	0	0	0	0	0	0	0	0	0	0	0	0	0	0	0	0	0	0	0	0	0	0	0	0	0	0	0	0	0	0	0	8	4	3	1	2	2	1	1	2	1	0	0	0	1	0	1	0
COTU-CM-0097	0	0	0	0	0	0	0	0	0	0	0	0	0	0	0	0	0	0	0	0	0	0	0	0	0	0	0	0	0	0	0	0	3	3	1	2	3	1	0	0	1	1	0	0	0	0	0	0	0
COTU-CM-0098	0	0	0	0	0	0	0	0	0	0	0	0	0	0	0	0	0	0	0	0	0	0	0	0	0	0	0	0	0	0	0	0	96	61	70	108	44	100	98	52	96	73	0	0	3	2	0	0	0
COTU-CM-0099	20	15	19	31	54	45	48	34	81	27	52	22	16	40	72	27	11	20	15	35	24	35	48	55	57	68	60	24	20	24	45	30	0	0	0	0	0	0	0	0	0	0	0	0	0	0	0	0	0
COTU-CM-0100	0	0	6	0	0	0	0	0	0	0	0	0	0	0	0	0	0	0	0	0	0	0	0	0	0	0	0	0	0	0	0	0	0	0	0	0	0	0	0	0	0	0	0	0	0	0	0	0	0
COTU-CM-0101	0	0	0	0	0	0	0	0	0	0	0	0	0	0	0	0	0	0	0	0	0	0	0	0	0	0	0	0	0	0	0	0	38	27	28	25	12	34	127	81	64	61	1	2	1	1	0	0	0
COTU-CM-0102	7	22	3	11	20	9	18	28	13	2	11	11	5	12	17	2	13	10	1	10	8	10	11	12	6	5	5	18	2	2	4	5	0	0	0	0	0	0	0	0	0	0	0	0	0	0	0	0	0
COTU-CM-0103	288	385	180	178	305	186	318	366	26	16	283	75	80	163	51	37	191	193	44	732	124	177	231	258	101	154	151	630	56	63	17	45	0	0	0	0	0	0	0	0	0	0	0	0	0	0	0	0	0
COTU-CM-0104	0	0	0	0	0	0	0	0	0	0	7	0	0	0	0	0	0	0	0	0	0	0	0	0	0	1	0	0	0	0	0	0	0	0	0	0	0	0	0	0	0	0	0	0	0	0	0	0	0
COTU-CM-0105	0	0	0	0	0	0	0	0	0	0	0	0	0	1	0	0	0	0	0	0	0	0	0	0	0	0	0	0	0	0	0	0	78	116	104	92	28	120	165	67	50	43	0	1	1	1	1	1	1
COTU-CM-0106	0	1	0	1	0	0	0	1	0	0	0	0	0	0	0	0	0	0	6	2	0	0	1	1	0	0	0	0	0	1	0	0	0	0	0	0	0	0	0	0	0	0	0	0	0	0	0	0	0
COTU-CM-0107	0	0	0	0	16	7	2	2	0	0	0	0	0	0	0	0	0	0	0	0	2	2	0	0	0	0	1	0	1	0	0	0	0	0	0	0	0	0	0	0	0	0	0	0	0	0	0	0	0
COTU-CM-0108	23	40	23	26	38	34	21	15	21	6	18	12	22	30	12	5	9	16	8	12	18	10	4	8	1	1	8	0	12	10	0	5	0	0	0	0	0	0	0	0	0	0	0	0	0	0	0	0	0
COTU-CM-0109	1	3	1	6	1	5	1	2	8	3	6	4	3	7	2	0	1	0	0	1	3	0	1	0	0	2	0	1	7	1	0	1	0	0	0	0	0	0	0	0	0	0	0	0	0	0	0	0	0
COTU-CM-0110	24	30	18	26	38	32	22	4	6	3	26	18	25	29	14	6	13	11	8	11	17	21	5	6	3	2	7	5	8	7	2	3	0	0	0	0	0	0	0	0	0	0	0	0	0	0	0	0	0
COTU-CM-0111	50	65	40	46	68	61	28	26	29	13	39	27	21	40	30	11	19	20	16	36	22	7	21	11	4	6	14	5	13	6	7	18	0	0	0	0	0	0	0	0	0	0	0	0	0	0	0	0	0
COTU-CM-0112	0	0	0	0	0	0	0	0	0	0	0	1	0	0	0	0	0	0	0	0	0	0	0	0	0	0	0	0	0	0	0	0	32	63	62	27	10	36	99	25	58	90	0	0	0	0	3	0	0
COTU-CM-0113	0	0	0	0	0	0	0	0	0	0	0	0	0	0	0	0	0	0	0	0	0	0	0	0	0	0	0	0	0	0	0	0	10	24	26	11	5	23	38	15	23	54	0	0	0	0	1	0	2
COTU-CM-0114	0	0	0	0	0	0	0	0	0	0	0	0	0	0	0	0	0	0	0	0	0	0	0	0	0	0	0	0	0	0	0	0	0	3	3	0	0	6	3	0	0	2	0	0	0	0	0	0	0
COTU-CM-0122	0	0	0	0	0	0	0	0	0	0	0	0	0	0	0	0	0	0	0	0	0	0	0	0	0	0	0	0	0	0	0	0	43	35	34	15	8	14	54	16	42	35	0	1	0	0	0	0	0
COTU-CM-0123	3	3	7	1	4	1	2	2	7	8	4	9	3	5	2	8	3	3	0	5	2	0	1	4	2	5	1	33	4	8	1	3	0	0	0	1	0	1	0	0	0	0	0	1	0	0	0	1	0
COTU-CM-0124	3	11	1	0	0	0	0	0	6	6	30	59	5	2	0	0	0	2	0	2	0	0	0	0	0	0	7	6	0	1	0	0	0	0	0	0	0	0	0	5	1	1	0	0	0	0	0	8	0
COTU-CM-0125	2	6	0	1	0	1	0	0	0	1	4	23	0	1	0	0	1	0	0	0	0	0	0	0	0	0	1	3	0	1	0	0	0	0	0	0	0	0	0	2	0	0	0	0	0	0	0	0	0
COTU-CM-0126	1	5	0	0	0	0	0	0	3	1	2	8	0	0	0	0	0	0	0	0	0	0	1	0	0	0	0	4	0	0	0	0	0	0	0	0	0	0	0	1	0	0	0	0	0	0	0	2	0
COTU-CM-0127	20	35	1	5	0	0	8	4	15	25	33	46	0	2	0	0	6	18	0	6	0	0	1	8	2	20	13	25	0	0	0	0	0	0	0	0	0	1	0	2	1	9	0	0	0	0	0	1	0
COTU-CM-0135	6	12	8	11	6	2	1	0	3	0	5	21	6	8	3	8	4	4	1	16	1	1	0	0	0	1	1	0	0	1	2	3	0	0	0	0	0	0	0	0	0	0	0	0	0	0	0	0	0
COTU-CM-0136	0	0	0	0	0	1	0	0	0	0	0	0	1	0	6	5	0	0	0	0	0	0	0	0	0	0	0	0	0	1	2	3	1	0	0	0	0	0	0	0	0	0	0	0	0	0	0	0	0
COTU-CM-0137	0	0	0	0	0	0	0	0	0	0	0	0	0	0	0	0	0	0	0	0	0	0	0	0	0	0	0	0	0	0	0	0	1	3	3	0	0	3	0	0	2	8	0	0	0	0	0	0	0
COTU-CM-0138	0	0	0	0	0	0	0	0	0	0	0	0	0	0	0	0	0	0	0	0	0	0	0	0	0	0	0	0	0	0	0	0	2	4	3	4	2	2	34	16	10	29	0	0	0	0	0	0	0
COTU-CM-0139	0	7	3	6	20	10	13	18	14	24	17	8	4	14	8	5	0	0	0	5	6	0	0	0	0	8	0	0	0	0	0	0	3	1	2	1	0	1	0	0	1	0	0	0	0	0	0	0	0
COTU-CM-0140	24	35	29	37	49	26	16	36	25	14	27	15	18	24	29	19	2	23	5	27	7	13	2	11	7	10	4	0	2	11	1	2	6	0	0	1	2	3	3	0	3	1	0	0	0	0	0	0	0
COTU-CM-0141	8	23	10	13	4	3	4	3	1	1	3	6	5	9	10	10	1	10	1	10	1	3	1	0	0	0	2	0	1	1	3	8	0	0	0	0	0	0	0	1	0	1	0	0	0	0	0	0	0
COTU-CM-0142	4	10	21	10	8	6	5	10	6	6	2	2	9	10	9	10	1	8	1	7	3	7	3	4	4	3	0	0	0	3	2	8	10	3	5	4	1	6	11	6	8	5	0	0	0	0	0	0	0
COTU-CM-0143	0	0	0	0	0	0	0	0	0	0	0	0	0	0	0	0	0	0	0	0	0	0	0	0	0	0	0	0	0	0	0	0	2	0	0	1	1	0	2	5	2	7	0	0	0	0	0	0	0
COTU-CM-0144	0	4	3	2	2	3	1	2	1	1	0	3	0	0	1	2	0	1	1	1	3	2	0	1	0	8	0	0	0	0	0	0	0	0	0	0	0	0	0	0	0	0	0	0	0	0	0	0	0
COTU-CM-0145	0	0	0	0	0	0	0	0	0	0	0	0	0	0	0	0	0	0	0	0	0	0	0	0	0	0	0	0	0	0	0	0	0	3	6	0	0	2	24	16	7	15	0	0	0	0	0	0	0
COTU-CM-0146	0	0	0	0	0	0	0	0	0	0	0	0	0	0	0	0	0	0	0	0	0	0	0	0	0	0	0	0	0	0	0	0	1	0	1	0	0	2	23	14	9	10	0	0	0	1	0	0	0
COTU-CM-0149	0	0	0	0	0	0	0	0	0	0	12	0	0	0	0	0	0	0	0	0	0	0	0	0	0	0	0	0	0	0	0	0	0	0	0	0	0	0	0	0	0	0	0	0	0	0	0	0	0
COTU-CM-0150	0	0	0	0	0	0	0	0	0	0	0	0	0	0	0	0	0	0	0	0	0	0	0	0	0	0	0	0	0	0	0	0	29	16	16	17	8	12	5	17	14	42	1	5	2	6	12	1	2
COTU-CM-0151	0	0	0	0	0	0	0	0	0	0	0	0	0	0	0	0	0	0	0	0	0	0	0	0	0	0	0	0	0	0	0	0	0	0	0	2	0	0	3	6	0	4	0	0	0	0	0	0	1
COTU-CM-0152	0	0	0	0	0	0	0	0	0	0	0	0	0	0	0	0	0	0	0	5	0	0	0	0	0	0	0	0	0	0	0	0	0	0	0	0	0	0	0	0	0	0	0	0	0	10	0	0	0
COTU-CM-0153	6	12	1	2	0	0	3	2	6	13	8	14	16	29	0	0	0	11	0	1	0	0	0	1	3	7	12	7	6	15	0	0	0	0	0	0	0	0	0	0	0	0	0	0	0	0	0	0	0
COTU-CM-0154	0	0	0	0	0	0	0	0	0	0	0	0	0	2	0	0	0	0	0	0	0	0	0	0	0	0	0	0	0	0	0	0	0	0	0	0	0	0	0	6	0	0	0	0	0	0	0	7	0
COTU-CM-0155	0	0	0	0	0	0	0	0	0	0	0	0	0	0	0	0	0	0	0	0	0	0	0	0	0	0	0	0	0	0	0	0	2	2	3	7	2	4	5	14	4	18	0	1	0	0	0	0	0
COTU-CM-0156	0	0	0	0	0	0	0	0	0	0	0	0	0	0	0	0	0	0	0	0	0	0	0	0	0	0	0	0	0	0	0	0	0	1	0	0	0	0	0	0	7	9	0	0	0	0	0	0	0
COTU-CM-0157	0	0	0	0	0	0	0	0	0	0	0	0	0	0	0	0	0	0	0	0	0	0	0	0	0	0	0	0	0	0	0	0	4	1	2	1	0	2	16	2	0	0	0	1	0	0	0	0	0
COTU-CM-0158	0	0	0	0	0	0	0	0	0	0	0	0	0	0	0	0	0	0	0	0	0	0	0	0	0	0	0	0	0	0	0	0	9	15	15	7	1	8	94	12	0	0	0	1	0	0	0	0	0
COTU-CM-0159	0	0	0	0	0	0	0	0	0	0	0	0	0	0	0	0	0	0	0	0	0	0	0	0	0	0	0	0	0	0	0	0	2	4	4	0	0	4	0	0	0	0	0	0	0	0	0	0	0
COTU-CM-0160	3	5	3	3	8	0	7	3	2	2	5	1	0	2	3	0	1	3	0	0	1	0	2	1	0	0	1	1	1	0	0	0	0	0	0	0	0	0	0	0	0	0	0	0	0	0	0	0	0
COTU-CM-0161	0	0	1	1	0	3	2	1	0	1	3	2	2	1	2	0	1	11	0	0	1	0	1	2	0	1	1	0	0	0	0	1	0	0	0	0	0	0	2	0	0	0	0	0	0	0	0	0	0
COTU-CM-0162	9	13	26	17	17	17	24	9	1	2	13	0	37	28	58	25	0	15	5	45	14	6	8	13	0	0	7	0	12	10	8	8	17	17	23	16	7	24	16	25	10	13	1	2	1	1	0	2	1
COTU-CM-0163	1	6	6	1	3	1	7	6	1	1	4	7	7	1	5	3	2	0	1	0	0	0	1	1	1	1	2	2	0	1	0	1	3	0	1	1	3	3	4	7	3	0	0	0	0	0	0	2	0
COTU-CM-0164	0	1	0	0	0	0	3	0	0	0	3	0	1	1	0	0	0	0	0	0	0	0	0	0	0	0	0	0	0	0	0	0	6	1	2	10	3	10	2	3	0	4	0	0	0	0	0	4	0
COTU-CM-0165	0	0	0	0	0	0	0	0	0	0	0	0	7	0	0	0	0	0	0	0	0	0	0	0	0	0	0	0	0	0	0	0	0	0	0	0	0	0	0	0	0	0	0	0	0	0	0	0	0
COTU-CM-0168	1	1	1	3	0	1	0	1	0	0	2	1	0	0	8	10	0	1	0	2	0	0	0	1	0	0	4	2	1	0	13	6	0	0	0	0	0	0	0	0	0	0	0	0	0	0	0	0	0
COTU-CM-0169	41	48	10	14	58	44	8	13	0	0	39	4	35	66	22	12	13	45	4	28	36	28	25	14	0	1	29	2	19	25	6	28	5	3	7	4	0	1	14	1	4	2	0	0	0	1	0	0	2
COTU-CM-0170	2	3	2	4	0	1	1	2	0	0	0	0	0	0	1	4	0	0	2	8	0	0	0	1	0	0	0	0	0	1	0	0	19	16	25	17	0	15	20	0	19	20	0	0	0	0	1	0	0
COTU-CM-0171	0	0	0	0	0	0	0	0	0	0	2	1	0	0	2	1	0	0	0	7	0	0	0	1	0	0	0	0	0	0	1	0	0	0	0	0	0	0	0	0	0	0	0	0	0	0	0	0	0
COTU-CM-0172	0	0	0	0	0	0	0	0	0	0	0	0	0	0	0	0	0	0	0	0	0	0	0	0	0	0	0	0	0	0	0	0	5	5	5	5	0	0	5	1	9	1	0	0	0	0	0	0	0
COTU-CM-0176	1	0	1	1	1	2	14	6	0	0	4	3	0	0	8	3	0	0	0	0	2	0	6	6	0	0	1	0	0	0	3	2	0	0	0	0	0	0	0	0	0	0	0	0	0	0	0	0	0
COTU-CM-0177	0	0	0	0	8	0	0	0	0	0	0	0	0	0	0	0	0	0	0	0	0	0	0	0	0	0	0	0	0	0	0	0	0	0	0	0	0	0	0	0	0	0	0	0	0	0	0	0	0
COTU-CM-0178	88	101	67	172	118	89	61	66	135	87	288	136	86	128	80	23	122	225	144	678	163	176	65	65	170	268	244	130	96	105	181	86	0	0	0	0	0	0	0	0	0	0	0	0	0	0	0	0	0
COTU-CM-0179	0	0	0	0	0	0	0	0	7	0	0	0	0	0	0	0	0	0	0	0	0	0	0	0	0	0	0	0	0	0	0	0	0	0	0	0	0	0	0	0	0	0	0	0	0	0	0	0	0
COTU-CM-0180	0	0	0	0	0	0	0	0	0	0	0	0	0	0	0	0	0	0	0	1	0	0	0	0	0	7	0	0	0	0	0	0	0	0	0	0	0	0	0	0	0	0	0	0	0	0	0	0	0
COTU-CM-0183	0	0	0	0	0	0	0	0	0	0	0	0	0	0	0	0	0	0	0	0	0	0	0	0	0	0	0	0	0	0	0	0	0	0	5	0	0	5	80	42	0	0	0	0	0	0	0	0	0
COTU-CM-0184	0	0	0	0	0	0	0	0	0	0	0	0	0	11	0	0	1	0	0	0	0	0	0	0	0	0	0	0	0	0	0	0	478	472	557	394	159	496	343	222	258	485	0	6	3	14	36	37	6
COTU-CM-0185	0	0	0	0	0	0	0	0	0	0	0	0	0	0	0	0	0	0	0	0	1	0	0	0	0	6	0	0	0	0	0	0	0	0	0	0	0	0	0	0	0	0	0	0	0	0	0	0	0
COTU-CM-0186	0	0	0	0	0	0	0	0	0	0	0	0	0	0	0	0	0	0	0	0	0	0	0	1	9	0	0	0	0	0	0	0	0	0	0	0	0	0	0	0	0	0	0	0	0	0	0	0	0
COTU-CM-0187	0	0	0	0	0	0	0	0	0	0	0	0	0	0	0	0	0	0	0	0	0	0	0	0	0	0	0	0	0	0	0	0	6	3	10	0	0	5	8	0	8	1	0	0	0	0	0	0	0
COTU-CM-0188	30	60	15	14	20	17	37	37	53	42	27	26	29	35	53	16	20	20	6	14	19	26	40	53	34	41	19	6	11	12	10	35	0	0	0	0	0	0	0	0	0	0	0	0	0	0	0	0	0
COTU-CM-0189	157	228	123	124	141	106	52	47	58	42	174	42	29	68	87	38	123	151	42	158	53	81	33	68	51	67	112	29	28	51	28	47	0	0	0	0	0	0	0	0	0	0	0	0	0	0	0	0	0
COTU-CM-0190	0	0	0	0	0	0	0	0	0	0	0	0	0	0	0	0	0	0	0	0	0	0	0	0	0	0	0	0	0	0	0	0	3	1	3	1	1	0	13	6	26	15	0	0	3	1	1	0	0
COTU-CM-0191	0	0	0	0	0	0	0	0	0	0	0	0	0	0	0	0	0	0	0	0	0	0	0	0	0	0	0	0	0	0	0	0	0	0	0	0	0	0	0	0	0	0	0	0	0	0	0	0	0
COTU-CM-0192	0	0	0	0	0	0	0	0	0	0	0	0	0	0	0	0	0	0	0	0	0	0	0	0	0	0	0	0	0	0	0	0	7	0	2	4	1	3	1	1	10	10	1	0	1	4	0	1	0
COTU-CM-0193	2	2	1	2	4	0	0	0	3	0	1	0	0	0	0	0	10	15	18	129	23	26	8	21	65	101	8	1	15	18	6	1	19	13	10	6	1	11	8	3	76	25	0	2	6	2	8	9	0
COTU-CM-0194	8	10	13	12	3	5	9	7	3	3	9	0	2	5	0	0	0	6	3	8	0	4	1	2	4	4	5	1	2	1	0	0	5	3	1	1	0	2	2	4	0	1	0	0	0	0	0	0	0
COTU-CM-0195	0	0	0	0	1	0	0	0	0	0	0	0	6	0	0	0	0	0	0	0	0	0	0	0	0	0	0	0	0	0	0	0	0	0	0	0	0	0	0	0	0	0	0	0	0	0	0	0	0
COTU-CM-0196	2	1	2	0	4	3	4	1	3	17	7	10	65	85	14	38	3	1	1	0	1	1	1	2	1	2	1	0	13	27	0	26	11	13	14	40	13	45	18	75	8	30	0	0	0	2	1	3	1
COTU-CM-0197	1	0	0	0	0	0	0	0	0	0	0	0	0	0	0	0	0	0	0	0	0	0	0	0	0	0	0	0	0	0	0	0	0	2	0	0	0	0	0	0	6	0	0	1	0	1	0	1	1
COTU-CM-0198	0	0	0	0	0	0	0	0	0	0	0	0	0	0	0	0	0	0	0	0	0	0	0	0	0	0	0	0	0	0	0	0	4	3	3	1	1	1	3	0	4	14	0	0	0	0	0	0	0
COTU-CM-0199	0	0	0	0	0	0	0	0	0	0	0	0	0	0	0	0	0	0	0	0	0	0	0	0	0	0	0	0	0	0	0	0	1	1	2	1	0	0	2	0	2	11	0	1	1	0	0	0	0
COTU-CM-0200	0	0	0	0	0	2	1	4	0	0	0	0	0	0	0	0	0	1	0	0	2	0	0	0	0	0	0	0	0	0	0	0	28	21	25	17	9	14	52	49	23	18	1	2	0	1	2	0	0
COTU-CM-0201	0	2	0	0	0	0	0	3	0	1	63	26	0	0	0	0	0	0	0	0	0	0	0	1	0	0	19	6	0	0	0	0	0	0	0	0	0	0	0	0	0	0	0	0	0	0	0	0	0
COTU-CM-0202	0	0	0	0	0	0	0	0	0	0	0	0	0	0	0	0	0	0	0	0	0	0	0	0	0	0	0	0	0	0	0	0	1	2	0	0	0	0	5	6	1	2	0	0	0	0	0	0	0
COTU-CM-0203	0	0	0	0	0	0	0	0	0	0	0	0	0	0	0	0	0	0	0	0	0	0	0	0	0	0	0	0	0	0	0	0	1	1	1	2	0	1	6	1	0	0	0	0	0	0	0	0	0
COTU-CM-0204	1	1	0	4	0	0	0	2	0	0	4	1	0	0	2	0	0	2	0	0	1	0	0	0	0	0	0	1	0	0	0	0	17	6	7	9	2	6	30	15	4	6	0	1	0	0	0	0	0
COTU-CM-0205	5	4	8	18	9	3	1	7	2	3	8	0	0	7	3	0	2	6	0	10	5	10	2	6	10	9	5	1	2	7	3	5	0	0	2	0	0	0	3	5	1	2	0	0	0	0	0	0	1
COTU-CM-0206	8	25	22	24	19	16	29	31	17	22	20	6	20	14	15	6	3	12	3	17	6	5	11	8	4	15	1	6	5	7	5	9	4	7	9	3	0	6	2	2	5	4	2	0	1	0	0	0	0
COTU-CM-0207	0	9	0	0	0	0	0	0	0	0	0	0	0	0	0	0	0	0	0	0	0	0	0	0	0	0	0	0	0	0	0	0	0	0	0	0	0	0	0	0	0	0	0	0	0	0	0	0	0
COTU-CM-0208	0	3	10	7	1	2	2	15	3	2	9	10	6	1	2	6	2	1	1	8	6	3	0	3	7	0	7	1	0	10	2	40	1	6	5	3	0	9	4	1	1	8	0	0	0	1	0	1	0
COTU-CM-0209	0	0	0	0	0	0	0	0	0	0	0	0	0	0	0	0	0	0	0	0	0	0	0	0	0	0	0	0	0	0	0	0	7	1	3	2	1	1	11	2	1	1	1	0	0	0	0	0	0
COTU-CM-0210	0	0	0	0	0	2	0	2	0	0	0	0	0	0	0	1	3	0	0	0	0	0	2	1	0	0	0	0	1	0	2	0	60	39	44	36	25	48	135	41	51	85	2	2	0	1	3	1	7
COTU-CM-0211	0	0	1	0	3	0	3	0	0	2	1	10	1	1	2	0	1	0	0	1	0	0	1	3	0	0	3	1	0	0	1	1	0	0	3	0	0	0	0	0	0	0	0	0	0	0	0	1	0
COTU-CM-0212	0	0	0	0	0	0	0	0	0	0	0	0	0	0	0	0	0	0	0	0	0	0	0	0	0	0	0	0	0	0	0	0	0	0	4	0	0	4	10	1	0	2	0	0	0	0	0	0	0
COTU-CM-0213	6	15	14	13	8	9	3	3	1	7	4	6	14	1	6	2	1	6	3	23	5	3	2	2	0	4	2	0	2	1	4	1	28	12	15	17	7	7	60	30	13	17	0	0	0	0	0	0	0
COTU-CM-0214	0	0	0	0	0	0	0	0	0	0	0	0	0	0	0	0	0	0	0	0	0	0	14	0	0	0	0	0	0	0	0	0	0	0	0	0	0	0	0	0	0	0	0	0	0	0	0	0	0
COTU-CM-0215	0	0	0	0	0	0	0	0	0	0	0	0	0	0	0	0	0	0	0	0	0	0	8	0	0	0	0	0	0	0	0	0	0	0	0	0	0	0	0	0	0	0	0	0	0	0	0	0	0
COTU-CM-0216	435	74	1170	117	311	110	300	115	539	32	1357	5	405	249	204	78	4454	854	6663	3442	3365	2981	3273	1514	3172	824	3221	68	3289	2257	2270	1300	0	0	0	0	0	0	0	0	0	0	0	0	0	0	0	0	0
COTU-CM-0217	8	11	6	8	15	6	7	2	16	11	15	28	9	8	19	3	6	25	13	20	18	13	0	11	8	34	16	0	7	10	11	15	0	0	0	0	0	0	0	0	0	0	0	0	0	0	0	0	0
COTU-CM-0218	2	3	8	4	3	3	1	3	3	3	6	9	4	2	3	1	2	13	7	12	6	3	3	5	8	7	1	4	3	7	5	4	0	0	0	0	0	0	0	0	0	0	0	0	0	0	0	0	0
COTU-CM-0219	1149	1922	1948	1992	1406	845	980	1679	1287	1210	2047	1195	1700	2283	1558	1158	564	1733	745	3094	802	792	655	994	921	1887	689	758	996	1163	766	1097	0	0	0	0	0	0	0	0	0	0	0	0	0	0	0	0	0
COTU-CM-0220	0	0	0	0	0	0	0	0	0	0	0	0	7	0	0	0	0	0	0	0	0	0	0	0	0	0	0	0	0	0	0	0	0	0	0	0	0	0	0	0	0	0	0	0	0	0	0	0	0
COTU-CM-0221	0	1	1	1	1	0	0	1	1	1	0	0	0	1	0	0	0	0	0	2	0	0	0	10	0	0	0	0	5	0	0	0	0	0	0	0	0	0	0	0	0	0	0	0	0	0	0	0	0
COTU-CM-0222	0	0	0	0	0	0	0	0	0	0	6	0	0	0	0	0	0	0	0	0	0	0	0	0	0	0	0	0	0	0	0	0	0	0	0	0	0	0	0	0	0	0	0	0	0	0	0	0	0
COTU-CM-0223	0	0	0	0	0	0	0	0	0	0	0	0	0	0	0	0	0	0	0	1	0	0	0	0	0	0	0	0	0	0	0	0	114	120	100	60	15	63	221	34	62	37	2	4	4	1	3	5	4
COTU-CM-0224	5	6	10	24	1	1	19	24	1	0	27	13	7	8	0	0	4	16	17	107	10	8	28	24	0	1	47	17	20	27	0	0	42	38	53	33	13	36	271	81	143	162	0	8	0	0	0	0	2
COTU-CM-0225	0	0	0	0	2	0	0	0	2	0	0	1	0	1	2	1	0	0	0	0	2	3	0	0	0	7	0	0	0	0	0	2	0	0	0	0	0	0	0	0	0	0	0	0	0	0	0	0	0
COTU-CM-0226	0	0	0	0	0	0	0	0	0	0	0	0	0	0	0	0	0	0	0	0	0	0	0	0	0	0	0	0	0	0	0	0	7	4	9	12	9	8	0	10	3	24	0	0	0	0	0	0	0
COTU-CM-0227	0	0	0	0	0	0	0	0	0	0	0	0	0	0	0	0	0	0	0	0	0	0	0	0	0	0	0	0	0	0	0	0	5	6	10	5	6	19	0	6	1	3	0	0	0	0	0	0	0
COTU-CM-0228	6	3	14	23	0	0	7	18	1	3	8	15	8	10	2	0	0	3	0	6	0	0	1	1	0	1	2	0	0	0	1	1	8	8	11	12	4	14	3	14	4	10	0	0	0	0	0	0	3
COTU-CM-0229	0	0	1	1	1	0	0	2	0	1	6	3	6	0	0	1	0	0	0	0	0	1	0	0	0	0	0	0	0	0	0	0	7	1	4	9	1	3	1	0	0	2	0	0	0	0	0	0	0
COTU-CM-0230	0	0	0	0	0	0	0	0	0	0	0	0	0	0	0	0	0	0	0	0	0	0	0	0	0	0	0	0	0	0	0	0	4	2	3	2	1	3	5	10	3	19	0	0	1	0	0	0	0
COTU-CM-0231	0	0	0	0	0	0	0	0	0	0	0	0	0	0	0	0	0	0	0	0	0	0	0	0	0	0	0	0	0	0	0	0	4	2	4	5	4	8	0	4	0	5	1	1	0	0	0	0	0
COTU-CM-0232	5	21	9	4	0	2	6	9	3	3	33	27	2	2	2	11	0	3	1	4	0	0	0	0	0	2	2	0	0	0	0	2	0	0	0	0	0	0	0	0	0	0	0	0	0	0	0	0	0
COTU-CM-0233	6	31	23	19	2	1	10	30	14	9	10	5	8	13	2	6	1	2	2	5	0	0	0	6	2	4	3	4	0	0	1	8	5	2	7	7	2	4	23	32	6	18	0	1	0	0	0	0	0
COTU-CM-0234	0	0	0	0	0	0	0	0	0	0	0	0	0	0	0	0	0	0	0	0	0	0	0	0	0	0	0	0	0	0	0	0	1	1	2	5	1	2	0	3	5	14	0	0	0	0	0	0	1
COTU-CM-0235	1	0	0	0	0	0	0	0	0	0	0	0	7	11	1	1	0	0	0	0	0	0	0	0	0	0	0	0	8	1	0	1	0	0	0	0	0	0	0	0	0	0	0	0	0	0	0	0	0
COTU-CM-0236	0	5	16	14	0	1	7	9	0	0	22	6	0	0	1	0	1	1	1	7	0	1	2	5	0	0	9	13	0	0	0	0	5	1	4	4	1	3	1	2	1	3	0	0	0	0	0	0	0
COTU-CM-0237	0	0	0	0	0	0	0	0	0	0	0	0	0	0	0	0	0	0	0	0	0	0	0	0	0	0	0	0	0	0	0	0	0	0	0	0	0	0	0	0	0	7	0	0	0	0	0	0	0
COTU-CM-0238	0	2	18	8	1	3	0	1	2	1	5	2	6	22	0	0	1	1	3	26	0	1	0	0	0	0	1	6	3	3	0	0	2	1	1	2	0	2	0	0	1	6	0	0	0	0	0	0	1
COTU-CM-0241	0	0	0	0	0	0	0	0	0	0	0	0	0	0	0	0	0	0	0	0	0	0	0	0	0	0	0	0	0	0	0	0	10	10	8	11	4	10	2	10	4	17	0	0	0	1	0	0	0
COTU-CM-0242	1	0	0	0	0	0	0	0	0	0	2	2	0	0	0	0	0	0	0	0	0	0	0	0	0	0	0	0	0	0	0	1	5	4	2	3	2	1	10	4	4	6	0	0	0	0	0	0	0
COTU-CM-0243	0	0	0	0	0	0	0	0	0	0	0	0	0	0	0	0	0	7	0	6	0	0	0	7	10	0	6	7	0	0	0	0	0	0	0	0	0	0	0	0	0	0	0	0	0	0	0	0	0
COTU-CM-0244	0	0	0	0	0	0	0	0	0	0	0	0	18	0	0	0	0	0	0	0	0	0	0	0	0	0	0	0	0	0	0	0	0	0	0	0	0	0	0	0	0	0	0	0	0	0	0	0	0
COTU-CM-0245	0	0	0	0	0	0	0	0	0	0	0	0	0	0	0	0	0	0	0	0	0	0	0	0	0	0	0	0	0	0	0	0	4	2	2	8	4	2	2	1	5	6	0	0	0	0	0	0	0
COTU-CM-0246	0	0	0	0	0	0	0	0	0	0	0	0	0	0	0	0	0	0	0	0	0	0	0	0	0	0	0	0	0	0	0	0	5	3	3	2	1	2	14	15	16	17	0	1	0	1	0	1	1
COTU-CM-0247	3	1	11	1	4	1	7	4	4	1	16	0	13	6	11	6	4	3	7	4	7	1	10	0	1	3	15	5	9	6	0	0	0	0	1	0	0	1	0	0	0	0	0	0	1	0	0	3	1
COTU-CM-0248	0	0	0	0	0	0	0	0	0	0	0	0	0	0	0	0	0	0	0	0	0	0	0	0	0	0	0	0	0	0	0	0	14	14	16	4	5	5	5	3	11	8	1	0	0	0	2	0	1
COTU-CM-0249	28	45	13	18	3	4	14	17	7	9	13	2	18	22	23	11	16	38	2	22	11	4	20	35	21	8	3	1	12	17	41	23	44	24	32	23	9	32	28	4	13	43	1	0	8	3	2	5	0
COTU-CM-0250	16	23	44	33	20	8	10	9	7	2	15	3	14	19	16	13	5	20	8	44	25	31	4	14	1	5	7	5	6	4	15	14	7	6	1	2	3	2	1	1	0	2	1	0	0	0	1	0	0
COTU-CM-0251	0	0	0	0	0	0	0	0	0	0	0	0	0	0	0	0	0	0	0	0	0	0	0	0	0	0	0	0	0	0	0	0	14	9	6	2	3	6	0	1	6	2	1	1	0	0	1	0	0
COTU-CM-0252	0	0	0	0	0	0	0	0	0	0	0	0	0	0	0	0	0	0	0	0	0	0	0	0	0	0	0	0	0	0	0	0	0	0	0	0	0	0	4	0	3	12	0	0	0	0	0	0	0
COTU-CM-0253	0	0	2	2	0	1	2	4	0	1	0	1	0	2	1	3	0	0	0	1	0	0	1	0	2	1	0	0	0	0	0	0	44	50	29	21	17	25	67	26	15	40	0	1	1	2	1	1	1
COTU-CM-0254	10	5	151	60	20	6	16	9	0	0	47	1	19	5	8	2	9	12	49	109	105	118	11	29	0	0	40	1	49	40	45	21	0	1	0	1	0	0	0	0	9	22	0	0	0	0	0	0	0
COTU-CM-0255	0	0	0	0	0	0	0	0	12	2	0	0	0	0	0	0	0	0	0	0	0	0	0	0	5	5	0	0	0	0	0	0	0	0	0	0	0	0	0	0	0	0	0	0	0	0	0	0	0
COTU-CM-0256	0	0	0	0	0	0	0	0	0	0	0	0	0	0	3	3	0	0	0	0	1	1	0	0	1	0	0	0	0	0	2	9	1	3	0	0	0	0	0	0	2	6	0	0	1	0	0	1	0
COTU-CM-0257	3	3	3	0	6	2	6	20	5	4	18	1	3	12	8	3	3	4	0	4	4	4	6	16	8	5	5	0	1	6	7	2	5	3	4	2	3	2	7	4	1	6	0	0	1	1	1	0	0
COTU-CM-0258	5	3	4	1	11	5	5	9	18	3	23	0	7	6	9	2	6	11	1	5	36	45	4	22	15	7	27	3	14	12	20	4	0	4	2	0	0	0	16	3	1	1	0	0	0	0	0	0	0
COTU-CM-0259	1	1	3	0	2	2	1	3	4	2	3	1	2	3	0	1	0	0	0	1	5	1	0	1	1	1	0	1	1	4	0	1	5	9	6	5	1	0	1	1	6	11	1	1	0	1	0	0	0
COTU-CM-0260	0	0	0	0	0	0	0	12	0	0	0	1	0	0	0	0	0	0	0	0	0	0	0	0	0	0	0	0	0	0	0	0	0	0	0	0	0	0	0	0	0	0	0	0	0	0	0	0	0
COTU-CM-0261	23	51	41	48	53	60	43	32	0	0	47	48	13	21	20	20	8	25	1	53	17	31	15	18	0	0	6	52	2	2	5	7	1	0	0	0	0	0	8	8	5	9	0	0	0	0	0	4	1
COTU-CM-0262	0	0	0	0	0	0	0	0	0	0	0	0	0	0	0	0	0	0	0	0	0	0	0	0	0	0	0	0	0	0	0	0	16	3	6	17	12	17	23	3	2	7	0	0	0	0	0	0	0
COTU-CM-0263	0	0	0	0	0	0	0	0	0	0	0	0	0	0	0	0	0	0	0	0	0	0	0	0	0	0	0	0	0	0	0	0	8	5	6	7	1	6	0	0	0	1	2	0	1	0	2	0	0
COTU-CM-0264	0	0	0	0	0	0	0	0	0	0	0	0	0	0	0	0	0	0	0	0	0	0	0	0	0	0	0	0	0	0	0	0	10	2	1	3	2	2	11	4	1	6	1	0	0	0	0	0	0
COTU-CM-0265	0	0	0	0	0	0	0	0	0	0	0	0	0	0	0	0	0	0	0	0	0	0	0	0	0	0	0	0	0	0	0	0	7	5	6	4	3	6	3	2	0	0	0	3	1	4	8	4	0
COTU-CM-0266	0	0	0	0	0	0	0	0	0	0	0	0	0	0	0	0	0	0	0	0	0	0	0	0	0	0	0	0	0	0	0	0	2	0	0	0	0	0	0	0	6	3	0	0	0	0	0	0	0
COTU-CM-0267	0	0	0	0	0	0	0	0	0	0	0	0	0	0	0	0	0	0	0	0	0	0	0	0	0	0	0	0	0	0	0	0	12	7	15	6	2	2	13	9	20	15	0	0	0	2	4	1	1
COTU-CM-0268	0	0	0	0	0	0	0	0	0	0	0	0	0	0	0	0	0	0	0	0	0	0	0	0	0	0	0	0	0	0	0	0	0	0	0	0	0	0	0	0	10	14	0	0	0	0	0	0	0
COTU-CM-0269	0	0	0	0	0	0	0	0	0	0	0	0	0	0	0	0	0	0	0	0	0	0	0	0	0	0	0	0	0	0	0	0	0	0	1	1	0	0	11	5	0	0	1	0	0	0	0	0	0
COTU-CM-0270	0	0	0	0	0	1	1	0	0	0	0	0	0	0	0	0	0	0	0	0	0	0	0	0	0	0	0	0	0	0	0	0	0	0	0	0	0	0	0	1	2	0	0	0	0	0	0	0	0
COTU-CM-0271	0	0	0	0	0	0	0	0	0	0	0	0	0	0	0	0	0	0	0	0	0	0	0	0	0	10	0	0	0	0	0	0	0	0	0	0	0	0	0	0	0	0	0	0	0	0	0	0	0
COTU-CM-0272	0	0	0	0	0	0	0	0	0	0	0	0	0	0	0	0	0	0	0	0	0	0	0	0	0	0	0	0	0	0	0	0	0	0	0	0	0	0	1	1	0	1	0	0	0	0	0	0	0
COTU-CM-0273	0	1	0	0	0	0	1	6	3	0	10	6	0	0	0	0	0	0	0	0	0	0	9	5	0	0	1	17	0	0	0	0	3	0	0	1	0	2	0	2	6	0	1	0	0	0	0	0	0
COTU-CM-0274	0	0	0	0	0	0	0	0	0	0	0	0	0	0	0	0	0	0	0	0	0	0	0	0	0	0	0	0	0	0	0	0	41	29	30	26	14	28	60	38	55	40	0	6	7	20	21	16	0
COTU-CM-0275	0	0	0	0	0	0	0	0	0	0	0	0	0	0	0	0	0	0	0	0	0	0	0	0	0	0	0	0	0	0	0	0	5	3	4	2	0	0	8	1	0	0	0	0	1	0	2	0	0
COTU-CM-0276	0	0	0	0	0	0	0	0	0	0	0	0	0	0	0	0	0	0	0	0	0	0	0	0	0	0	0	0	0	0	0	0	0	0	0	0	0	0	0	0	0	0	0	0	6	0	0	0	0
COTU-CM-0277	0	0	0	0	0	0	0	0	0	0	0	0	0	0	0	0	0	0	0	0	0	0	0	0	0	0	0	0	0	0	0	0	3	4	1	0	0	0	1	3	4	3	0	0	1	2	4	2	0
COTU-CM-0278	0	0	0	0	0	0	0	0	0	0	0	0	0	0	0	0	0	0	0	0	0	0	0	0	0	0	0	0	0	0	0	0	0	1	0	0	0	0	1	0	2	5	0	0	0	0	0	1	0
COTU-CM-0279	2	1	0	0	0	0	0	0	0	0	0	0	0	0	0	0	3	0	0	0	0	0	0	0	0	0	0	0	0	0	0	0	3	5	11	4	2	5	1	0	2	3	0	0	1	2	1	3	0
COTU-CM-0280	0	0	0	0	0	0	0	0	0	0	0	0	0	0	0	0	0	0	0	0	0	0	0	0	0	0	0	0	0	0	0	0	9	2	5	4	2	12	0	4	4	4	0	4	2	3	3	2	0
COTU-CM-0281	0	0	0	0	0	0	0	0	0	0	0	0	0	0	0	0	0	0	0	0	0	0	0	0	0	0	0	0	0	0	0	0	0	0	0	0	0	0	0	0	2	9	0	0	0	0	0	0	0
COTU-CM-0282	0	0	0	0	0	0	4	8	0	0	1	0	0	0	0	0	0	0	0	0	0	0	2	10	0	0	1	0	0	0	0	0	0	0	0	0	0	0	0	0	0	0	0	0	0	0	0	0	0
COTU-CM-0283	0	0	0	0	0	0	0	0	0	0	0	0	0	0	0	0	0	0	0	0	0	0	0	0	0	0	0	0	0	0	0	0	0	6	0	0	0	0	0	0	0	0	0	0	0	0	0	0	0
COTU-CM-0284	0	0	0	0	0	0	0	0	0	0	0	0	0	0	0	0	0	0	0	0	0	0	0	0	0	0	0	0	0	0	0	0	0	7	0	0	0	0	0	0	0	0	0	0	0	0	0	0	0
COTU-CM-0285	0	0	0	0	0	0	0	0	0	0	0	0	0	0	0	0	0	0	0	0	0	0	0	0	0	0	0	0	0	0	0	0	2	2	0	0	0	2	22	10	4	3	0	1	0	1	2	0	3
COTU-CM-0286	0	0	0	0	0	0	0	0	0	0	0	0	0	0	0	0	0	0	0	0	0	0	0	0	0	0	0	0	0	0	0	0	36	27	19	25	8	30	6	1	8	8	0	0	1	0	0	0	0
COTU-CM-0287	0	0	0	0	0	0	0	0	0	0	0	0	0	0	0	0	0	0	0	0	0	0	0	0	0	0	0	0	0	0	0	0	13	8	4	7	2	7	7	1	4	8	0	0	0	1	1	2	0
COTU-CM-0288	0	0	0	0	0	0	0	0	0	0	0	0	0	0	0	0	0	0	0	0	0	0	0	0	0	0	0	0	0	0	0	0	5	8	4	4	2	4	0	0	0	0	0	1	0	4	8	2	0
COTU-CM-0289	0	0	0	0	0	0	0	0	0	0	0	0	0	0	0	0	0	0	0	0	0	0	0	0	0	0	0	0	0	0	0	0	24	20	16	14	2	4	14	4	3	7	1	4	4	3	17	5	0
COTU-CM-0290	0	0	0	0	0	0	0	0	0	0	0	0	0	0	0	0	0	0	0	0	0	0	0	0	0	0	0	0	0	0	0	0	8	11	18	5	1	8	5	0	14	15	0	3	0	2	2	1	0
COTU-CM-0291	0	0	0	0	0	0	0	0	0	0	0	0	0	0	0	0	0	0	0	0	0	0	0	0	0	0	0	0	0	0	0	0	36	38	44	18	4	16	22	10	15	11	5	16	0	17	6	17	2
COTU-CM-0292	0	0	0	0	0	0	0	0	0	0	0	0	0	0	0	0	0	0	0	0	0	0	0	0	0	0	0	0	0	0	0	0	0	0	0	0	0	0	12	2	0	0	0	0	0	0	0	0	0
COTU-CM-0293	0	0	0	0	0	0	0	0	0	0	0	0	0	0	0	0	0	0	0	0	0	0	0	0	0	0	0	0	0	0	0	0	0	0	0	0	0	0	0	0	0	0	0	0	0	11	0	0	0
COTU-CM-0294	0	0	0	0	0	0	0	0	0	0	0	0	0	0	0	0	0	0	0	0	0	0	0	0	0	0	0	0	0	0	0	0	5	13	4	2	1	4	8	12	7	3	2	2	1	6	2	2	3
COTU-CM-0295	0	0	0	0	0	0	0	0	0	0	0	0	0	0	0	0	0	0	0	0	0	0	0	0	0	0	0	0	0	0	0	0	189	186	163	88	27	104	0	0	176	129	10	8	14	25	22	21	0
COTU-CM-0296	0	0	0	0	0	0	0	0	0	0	0	0	0	0	0	0	0	0	0	0	0	0	0	0	0	0	0	0	0	0	0	0	8	6	6	4	1	2	0	0	1	0	0	0	0	0	1	2	0
COTU-CM-0297	0	0	0	0	0	0	0	0	0	0	0	0	0	1	0	0	0	0	0	0	0	0	0	0	0	0	0	0	0	0	0	0	4	8	4	4	0	9	2	0	0	0	0	0	0	4	3	6	0
COTU-CM-0298	0	0	0	0	0	0	0	0	0	0	0	0	0	0	0	0	0	0	0	0	0	0	0	0	0	0	0	0	0	0	0	0	3	0	2	1	1	1	7	4	98	101	0	0	0	0	0	0	1
COTU-CM-0299	0	0	0	0	0	0	0	1	0	0	0	0	0	0	0	0	0	0	0	0	0	0	0	0	0	0	0	0	0	0	0	0	3	9	5	2	1	2	1	0	0	0	2	0	0	0	0	0	0
COTU-CM-0300	0	0	0	0	0	0	0	0	0	0	0	0	0	0	0	0	0	0	0	0	0	0	0	0	0	0	0	0	0	0	0	0	3	7	5	1	2	6	2	2	0	0	0	0	0	0	0	0	0
COTU-CM-0301	0	0	0	0	0	0	0	0	0	0	0	0	0	0	0	0	0	0	0	0	0	0	0	0	0	0	0	0	0	0	0	0	9	13	11	5	3	5	1	3	14	12	0	0	1	3	0	2	0
COTU-CM-0302	0	0	0	0	0	0	0	0	0	0	0	0	0	0	0	0	0	0	0	0	0	0	0	0	0	0	0	0	0	0	0	0	2	1	1	0	0	0	1	1	11	11	0	0	0	1	0	0	4
COTU-CM-0303	0	0	0	0	0	0	0	0	0	0	0	0	0	0	0	0	0	0	0	0	0	0	0	0	0	0	0	0	0	0	0	0	7	7	9	6	1	7	7	3	16	5	0	0	1	1	2	0	0
COTU-CM-0304	0	0	0	0	0	0	0	0	0	0	0	0	0	0	0	0	0	0	0	0	0	0	0	0	0	0	0	0	0	0	0	0	2	2	3	0	0	5	1	0	3	1	0	0	0	0	1	2	0
COTU-CM-0305	0	0	0	0	0	0	0	0	0	0	0	0	0	0	0	0	0	0	0	0	0	0	0	0	0	0	0	0	0	0	0	0	1	3	1	1	0	1	12	4	6	10	0	0	0	1	0	1	1
COTU-CM-0306	0	0	0	0	0	0	0	0	0	0	0	0	0	0	0	0	0	0	0	0	0	0	0	0	0	0	0	0	0	0	0	0	3	0	1	0	0	0	6	1	2	0	1	1	1	0	0	1	2
COTU-CM-0307	0	0	0	0	0	0	0	0	0	0	0	0	0	0	0	0	0	0	0	0	0	0	0	0	0	0	0	0	0	0	0	0	1	1	0	1	1	0	13	1	10	2	0	0	0	0	10	0	0
COTU-CM-0308	0	0	0	0	0	0	0	0	0	0	0	0	0	0	0	0	0	0	0	0	0	0	0	0	0	0	0	0	0	0	0	0	57	69	69	33	12	43	1	0	0	2	1	0	2	4	0	0	0
COTU-CM-0309	0	0	0	0	0	0	0	0	0	0	0	0	0	0	0	0	0	0	0	0	0	0	0	0	0	0	0	0	0	0	0	0	1	1	1	0	0	1	0	1	3	8	0	0	0	2	0	1	0
COTU-CM-0310	0	0	0	0	0	0	0	0	0	0	0	0	0	0	0	0	0	0	0	0	0	0	0	0	0	0	0	0	0	0	0	0	1	2	2	0	0	1	14	16	33	45	0	0	0	1	0	0	7
COTU-CM-0311	0	0	0	0	0	0	0	0	0	0	0	0	0	0	0	0	0	0	0	0	0	0	0	0	0	0	0	0	0	0	0	0	32	13	26	15	5	12	10	7	7	9	0	0	0	0	1	0	1
COTU-CM-0312	0	0	0	0	0	0	0	0	0	0	0	0	0	0	0	0	0	0	0	0	0	0	0	0	0	0	0	0	0	0	0	0	38	31	23	23	13	38	17	3	18	26	1	0	0	2	0	2	0
COTU-CM-0313	0	0	0	0	0	0	0	0	0	0	0	0	0	0	0	0	0	1	0	0	0	0	0	1	0	0	0	0	0	0	0	0	1	3	0	1	1	0	10	0	2	1	0	0	0	0	0	0	0
COTU-CM-0314	0	0	0	0	0	0	0	0	0	0	0	0	0	0	0	0	0	0	0	0	0	0	0	0	0	0	0	0	0	0	0	0	2	1	0	0	1	1	6	1	1	2	0	0	0	0	0	3	0
COTU-CM-0315	0	0	0	0	0	0	0	0	0	0	0	0	0	0	0	0	0	0	0	0	0	0	0	0	0	0	0	0	0	0	0	0	1	0	1	6	2	1	2	4	1	4	0	0	0	0	0	0	0
COTU-CM-0316	0	0	0	0	0	0	0	0	0	0	0	0	0	0	0	0	0	0	0	0	0	0	0	0	0	0	0	0	0	0	0	0	1	3	3	4	0	1	3	7	7	5	0	0	0	0	1	0	0
COTU-CM-0317	0	0	0	0	0	0	0	0	0	0	0	0	0	0	0	0	0	0	0	0	0	0	0	0	0	0	0	0	0	0	0	0	6	4	7	6	5	6	2	1	14	32	0	0	0	0	0	0	0
COTU-CM-0320	0	0	0	0	0	0	0	0	0	0	0	0	0	0	0	0	0	0	0	7	0	0	0	0	0	0	0	0	0	0	0	0	0	0	0	0	0	0	0	0	0	0	0	0	0	0	0	0	0
COTU-CM-0321	23	28	68	89	74	78	66	156	142	143	228	273	193	176	42	27	18	43	16	149	38	48	53	102	166	255	122	153	119	98	30	41	7	7	6	6	0	6	0	0	9	18	0	0	0	3	1	0	0
COTU-CM-0322	0	0	0	0	0	0	0	1	0	0	0	0	0	0	0	0	0	0	0	0	0	0	0	0	0	6	0	0	0	0	0	0	0	0	0	0	0	0	0	0	0	0	0	0	0	0	0	0	0
COTU-CM-0323	9	4	16	25	21	11	14	43	25	26	45	62	28	44	5	5	4	11	3	43	9	17	15	18	54	50	24	31	37	20	12	10	3	4	2	2	1	2	0	0	5	9	0	0	0	0	0	1	0
COTU-CM-0324	0	0	0	0	0	0	0	0	0	0	0	0	0	0	0	0	0	0	0	0	0	0	0	0	0	0	0	0	0	0	0	0	0	1	1	0	0	0	10	7	0	0	0	0	0	0	0	0	0
COTU-CM-0325	0	0	0	0	0	0	0	0	0	0	0	0	0	0	0	0	0	0	0	0	0	0	0	0	0	0	0	0	0	0	0	0	33	29	45	24	13	18	15	12	3	13	0	0	0	0	0	0	0
COTU-CM-0331	2	2	0	3	1	1	5	6	1	0	3	3	0	3	0	0	0	1	0	0	0	0	0	2	0	0	0	0	0	0	0	0	6	3	1	2	1	3	0	0	2	3	0	0	0	0	0	0	0
COTU-CM-0332	0	0	0	0	0	0	0	0	9	0	0	0	0	0	0	0	0	0	0	0	0	0	0	0	0	0	0	0	0	0	0	0	0	0	0	0	0	0	0	0	0	0	0	0	0	0	0	0	0
COTU-CM-0333	37	36	74	71	83	49	69	70	26	62	143	130	83	111	44	16	6	31	10	18	34	28	12	30	15	17	21	14	22	30	9	21	0	0	0	0	0	0	3	1	2	1	0	0	0	0	0	0	0
COTU-CM-0334	0	0	0	0	0	0	0	0	0	0	0	13	0	0	0	0	0	0	0	0	0	0	0	0	0	0	0	0	0	0	0	0	0	0	0	0	0	0	0	0	0	0	0	0	0	0	0	0	0
COTU-CM-0335	0	7	0	0	0	0	9	11	12	12	0	0	0	0	0	0	0	1	0	0	0	0	1	3	9	5	0	0	0	0	0	0	0	0	0	0	0	0	0	0	0	0	0	0	0	0	0	0	0
COTU-CM-0336	0	0	0	0	1	1	12	9	19	8	0	0	0	0	0	0	0	0	0	0	0	0	3	2	4	6	0	0	0	0	0	0	0	0	0	0	0	0	0	0	0	0	0	0	0	0	0	0	0
COTU-CM-0337	0	1	0	0	1	1	10	32	28	31	0	0	0	0	0	0	0	1	0	0	1	0	12	11	17	17	0	0	0	0	0	0	0	0	1	0	0	1	4	0	3	1	0	0	0	0	0	0	1
COTU-CM-0338	0	0	0	0	0	0	0	0	0	0	0	12	0	0	0	0	0	0	0	0	0	0	0	0	0	0	0	0	0	0	0	5	0	0	0	0	0	0	0	0	0	0	0	0	0	0	0	0	0
COTU-CM-0339	0	0	0	0	0	6	0	0	0	0	0	0	0	0	0	0	0	0	1	0	0	0	0	0	0	0	0	0	0	0	0	0	0	0	0	0	0	0	0	0	0	0	0	0	0	0	0	0	0
COTU-CM-0340	0	0	0	0	0	0	0	0	0	0	0	0	0	0	0	0	0	0	0	0	0	0	0	0	0	0	0	0	0	0	0	0	153	137	131	122	53	146	303	348	20	36	0	0	1	3	0	4	4
COTU-CM-0344	0	0	0	0	0	0	0	0	0	0	0	0	0	0	0	1	0	0	0	0	0	0	0	0	0	0	0	0	0	0	0	0	23	42	31	27	10	33	7	8	27	58	1	0	0	0	0	0	0
COTU-CM-0347	0	0	0	0	0	0	0	0	0	0	0	0	0	0	0	0	0	0	0	0	0	0	0	0	0	0	0	0	0	0	0	0	1	2	4	2	0	3	3	14	8	14	0	0	0	0	0	0	0
COTU-CM-0348	0	0	0	0	0	0	0	0	0	0	0	1	0	0	0	0	0	0	0	0	0	0	0	0	0	0	0	0	0	0	0	0	6	2	5	12	9	6	3	6	0	2	0	0	0	2	1	0	0
COTU-CM-0349	1	9	5	7	4	0	1	0	1	2	6	7	12	1	5	3	0	1	0	10	0	3	1	1	1	0	0	2	0	0	1	1	0	0	0	0	0	1	1	1	0	5	0	0	0	0	0	0	0
COTU-CM-0350	0	0	0	0	0	0	1	0	0	0	0	0	0	0	0	0	0	0	0	0	0	0	0	0	0	0	0	0	0	0	0	0	9	3	2	9	1	14	0	2	0	2	0	0	0	0	0	0	0
COTU-CM-0351	0	0	0	0	0	0	0	0	0	0	0	0	0	0	0	0	0	0	0	0	0	0	0	0	0	0	0	0	0	0	0	0	0	2	1	0	0	1	1	0	8	25	0	0	0	0	0	0	0
COTU-CM-0352	2	10	10	13	1	1	10	15	1	1	11	31	6	8	9	7	0	1	0	6	1	0	0	1	2	0	1	2	0	0	1	0	0	0	0	0	0	0	0	0	0	0	0	0	0	0	0	0	0
COTU-CM-0353	5	3	9	3	0	0	6	8	1	1	6	13	6	0	7	5	0	1	0	0	0	0	2	0	0	0	0	1	0	1	0	0	2	2	9	1	0	2	2	0	25	39	1	0	0	0	0	0	0
COTU-CM-0354	0	0	0	0	0	0	0	0	0	0	0	0	0	0	0	0	0	0	0	0	0	0	0	0	0	0	0	0	0	0	0	0	0	2	3	8	3	2	128	537	3	10	0	0	0	4	0	0	1
COTU-CM-0355	0	0	0	0	0	0	0	0	0	0	0	0	0	0	0	0	0	0	0	0	0	0	0	0	0	0	0	0	0	0	0	0	2	3	1	1	0	1	4	6	8	17	0	0	0	0	0	0	0
COTU-CM-0356	0	1	1	0	2	1	2	0	0	0	2	7	0	1	1	2	0	0	0	1	0	0	0	0	1	0	0	1	0	0	0	0	2	0	0	3	0	5	1	1	0	0	0	0	0	0	0	0	0
COTU-CM-0357	0	0	0	0	0	0	0	0	0	0	0	0	0	0	0	0	0	0	0	0	0	0	0	0	0	0	0	0	0	0	0	0	11	5	6	10	6	11	1	6	0	12	0	0	0	0	0	2	0
COTU-CM-0358	1	4	13	16	6	4	4	2	7	1	13	18	2	0	3	5	0	0	0	0	0	0	0	1	2	1	1	5	1	0	1	0	1	0	2	4	1	1	5	7	3	14	0	0	0	0	0	0	0
COTU-CM-0359	0	1	6	4	0	1	0	0	5	2	8	8	0	2	0	2	0	0	0	1	0	0	0	0	1	0	0	0	0	1	0	0	0	0	0	0	0	0	0	0	0	0	0	0	0	0	0	0	0
COTU-CM-0360	0	0	0	0	0	0	1	0	0	0	0	0	0	0	0	2	0	0	0	0	0	0	0	0	0	0	0	0	0	0	0	0	1	1	0	1	0	0	0	0	3	7	0	0	0	0	0	0	0
COTU-CM-0361	0	2	0	0	0	0	0	0	0	0	6	0	0	1	0	0	0	1	0	0	0	0	0	0	0	0	0	0	0	0	0	0	0	0	0	0	0	0	0	0	0	0	0	0	0	0	0	0	0
COTU-CM-0362	0	0	1	0	1	0	0	0	0	1	1	1	0	0	3	0	0	0	1	0	0	0	0	0	0	0	0	1	0	0	0	0	8	4	3	11	4	12	2	12	2	43	0	0	0	0	0	0	0
COTU-CM-0363	0	0	0	0	0	0	0	0	0	0	0	0	0	0	0	0	0	0	0	0	0	0	0	0	0	0	0	0	0	0	0	0	4	3	1	8	4	12	1	8	0	12	0	0	0	0	0	0	0
COTU-CM-0364	0	0	1	0	0	0	0	1	1	0	1	0	0	0	0	0	0	1	0	0	0	0	0	0	0	0	0	0	0	0	0	0	0	0	0	1	1	1	1	1	0	11	0	0	0	0	0	0	0
COTU-CM-0365	0	0	0	0	0	0	0	0	0	0	0	0	0	0	0	0	0	6	0	0	0	0	0	0	0	0	0	0	0	0	0	0	0	0	0	0	0	0	0	0	0	0	0	0	0	0	0	0	0
COTU-CM-0367	0	0	0	0	0	0	0	0	0	0	0	0	0	0	0	0	0	0	0	0	0	0	0	0	0	0	0	0	0	0	0	0	3	6	5	10	4	21	6	12	2	19	0	0	0	0	0	0	0
COTU-CM-0369	2	3	3	1	34	15	3	3	1	1	0	1	2	0	2	0	0	0	0	0	3	10	0	1	0	0	0	0	0	0	0	0	0	1	2	3	0	3	1	1	0	8	0	0	0	0	0	0	0
COTU-CM-0370	0	0	0	0	0	0	0	0	0	0	0	0	0	0	0	0	0	0	0	0	0	0	0	0	0	0	0	0	0	0	0	0	1	8	5	9	2	10	0	0	1	0	0	0	0	1	2	1	0
COTU-CM-0371	0	0	0	0	0	0	0	0	0	0	0	0	0	0	0	0	0	0	0	0	0	0	0	0	0	0	0	0	0	0	0	0	0	0	1	1	1	4	6	4	8	11	0	0	0	0	0	0	0
COTU-CM-0372	0	0	0	0	0	0	0	0	0	0	0	0	0	0	0	0	0	0	0	0	0	0	0	0	0	0	0	0	0	0	0	0	0	1	1	4	5	7	12	19	0	9	0	0	0	0	0	0	1
COTU-CM-0373	0	0	0	0	0	0	0	0	0	0	0	0	0	0	0	0	0	0	0	0	0	0	0	0	0	0	0	0	0	0	0	0	0	0	0	1	1	2	13	16	0	6	0	0	0	0	0	0	0
COTU-CM-0374	0	0	0	0	0	0	0	0	0	0	0	0	0	0	0	0	0	0	0	0	0	0	0	0	0	0	0	0	0	0	0	0	22	18	21	54	20	62	4	9	24	93	0	0	0	1	0	1	0
COTU-CM-0375	3	5	13	2	1	0	7	13	8	3	21	19	3	2	9	5	0	5	0	0	0	0	0	0	0	8	0	1	1	1	1	9	0	0	1	0	0	1	1	4	3	0	0	0	0	0	0	0	0
COTU-CM-0376	25	42	77	74	109	61	66	88	43	26	107	88	72	92	91	96	5	8	10	12	10	16	14	25	38	35	13	36	14	8	7	34	3	1	3	5	4	9	9	22	7	7	0	0	0	0	0	0	0
COTU-CM-0377	0	11	0	0	0	0	2	7	0	0	10	8	1	1	0	0	1	0	1	0	0	0	0	0	0	0	0	0	0	0	0	0	0	0	0	0	0	0	0	0	0	0	0	0	0	0	0	0	0
COTU-CM-0378	5	2	13	12	19	15	7	7	1	5	10	13	10	18	14	21	0	0	0	3	2	5	2	4	9	3	1	4	5	1	2	3	0	0	0	0	0	0	0	0	0	0	0	0	0	0	0	0	0
COTU-CM-0379	0	0	0	0	0	0	0	0	0	0	0	0	0	0	0	0	0	0	0	0	0	0	0	0	0	0	0	0	0	0	0	0	10	23	10	24	8	26	12	55	0	3	0	0	0	2	5	0	0
COTU-CM-0380	0	0	0	0	0	0	0	0	0	0	0	0	0	0	0	0	0	0	0	0	0	0	0	0	0	0	0	0	0	0	0	0	3	1	6	5	0	8	0	0	1	9	1	1	0	0	0	3	0
COTU-CM-0381	1	1	3	3	1	1	4	7	0	0	5	7	0	3	1	0	0	1	0	0	0	0	0	1	0	0	3	1	0	0	0	1	8	5	5	12	5	29	0	0	0	1	0	0	1	3	4	1	0
COTU-CM-0382	0	0	0	0	0	0	0	0	0	0	0	0	0	0	0	0	0	0	0	0	0	0	0	0	0	0	0	0	0	0	0	0	0	2	1	1	1	4	8	10	1	9	0	0	0	0	0	1	0
COTU-CM-0383	0	0	0	0	0	0	0	0	0	0	0	0	0	0	0	0	0	0	0	0	0	0	0	0	0	0	0	0	0	0	0	0	3	5	3	19	7	19	17	48	1	57	0	0	1	0	0	1	0
COTU-CM-0388	2	4	3	2	0	0	1	1	0	1	6	2	2	2	3	7	0	0	0	0	0	2	0	0	0	0	0	0	0	0	0	1	1	2	0	0	1	2	2	12	1	5	0	0	0	0	0	0	0
COTU-CM-0389	0	0	0	0	0	0	0	0	0	0	0	0	0	0	0	0	0	0	0	0	0	0	0	0	0	0	0	0	0	0	0	0	0	1	1	1	0	3	9	3	11	21	0	0	0	0	0	0	0
COTU-CM-0390	0	0	0	0	0	0	0	0	0	0	0	0	0	0	0	0	0	0	0	0	0	0	0	0	0	0	0	0	0	0	0	0	5	6	3	4	4	3	22	11	22	41	0	0	0	0	0	0	0
COTU-CM-0391	0	0	0	0	0	0	0	0	0	0	0	0	0	0	0	0	0	0	0	0	0	0	0	0	0	0	0	0	0	0	0	0	1	0	0	0	0	0	6	1	3	5	0	0	0	0	0	0	0
COTU-CM-0392	0	0	0	0	0	0	0	0	0	0	0	0	0	0	0	0	0	0	0	0	0	0	0	0	0	0	0	0	0	0	0	0	0	0	0	0	0	0	8	1	0	1	0	0	0	0	0	0	0
COTU-CM-0393	0	0	0	0	0	0	0	0	0	0	0	0	0	0	0	0	0	0	0	0	0	0	0	0	0	0	0	0	0	0	0	0	0	0	0	0	0	0	13	11	2	3	0	0	0	0	0	0	0
COTU-CM-0394	0	0	0	0	0	0	0	0	0	0	0	0	0	0	0	0	0	0	0	0	0	0	0	0	0	0	0	0	0	0	0	0	7	6	15	15	3	16	3	9	6	16	0	0	0	0	0	0	0
COTU-CM-0395	0	0	0	0	96	64	0	0	0	0	0	0	0	0	0	0	0	0	0	0	30	24	0	0	0	0	0	0	0	0	0	0	4	4	3	0	0	5	8	11	2	3	0	0	0	0	0	0	0
COTU-CM-0396	0	0	0	0	0	0	0	0	0	0	0	0	0	0	0	0	0	0	0	0	0	0	0	0	0	0	0	0	0	0	0	0	7	10	3	5	3	4	3	4	1	1	0	0	0	0	0	0	0
COTU-CM-0397	0	0	0	0	0	0	0	0	0	0	0	0	0	0	0	0	0	0	0	0	0	0	0	0	0	0	0	0	0	0	0	0	5	0	1	1	1	4	2	0	4	9	0	0	0	0	0	0	0
COTU-CM-0400	0	0	0	0	0	0	0	0	1	0	10	17	0	0	0	0	0	0	0	0	0	0	0	0	0	0	0	1	0	0	0	0	1	3	0	4	1	0	11	24	0	0	0	0	0	0	0	0	0
COTU-CM-0401	0	0	0	0	0	0	0	0	0	0	0	0	0	0	0	0	0	0	0	0	0	0	0	0	0	0	0	0	0	0	0	0	54	41	46	35	16	36	11	9	14	9	0	0	0	0	0	0	0
COTU-CM-0402	1	1	1	0	0	0	0	0	0	0	1	0	0	0	0	0	0	0	0	0	0	0	0	0	0	0	0	0	0	0	0	0	12	1	3	5	2	2	12	8	2	4	0	0	0	1	0	0	0
COTU-CM-0403	1	0	0	0	0	0	0	0	0	0	0	0	0	0	0	0	0	0	0	0	0	0	0	0	0	0	0	0	0	0	0	0	4	3	2	4	4	3	5	1	7	5	0	0	0	0	0	0	0
COTU-CM-0404	0	0	0	0	0	0	0	0	0	0	0	0	0	0	0	0	0	0	0	0	0	0	0	0	0	0	0	0	0	0	0	0	0	0	0	0	0	0	0	0	0	0	0	0	0	0	15	0	0
COTU-CM-0405	0	0	0	0	0	0	0	0	0	0	0	0	0	0	0	0	0	0	0	0	0	0	0	0	0	0	0	0	0	0	0	0	105	83	78	37	20	37	262	222	206	257	0	0	0	0	0	0	0
COTU-CM-0406	0	0	0	0	0	0	0	0	0	0	0	0	0	0	0	0	0	0	0	0	0	0	0	0	0	0	0	0	0	0	0	0	0	0	0	0	0	0	36	28	42	31	0	0	0	0	0	0	0
COTU-CM-0407	0	0	0	0	0	0	0	0	6	0	0	0	0	0	0	0	0	0	0	0	0	0	0	0	0	0	0	0	0	0	0	0	0	0	0	0	0	0	0	0	0	0	0	0	0	0	0	0	0
COTU-CM-0408	0	0	0	0	0	0	0	0	0	0	0	0	8	0	0	0	0	0	0	0	0	0	0	0	0	0	0	0	0	0	0	0	0	1	0	0	0	0	0	0	0	0	0	0	0	0	0	0	0
COTU-CM-0409	5	11	6	12	7	9	4	10	2	4	10	7	11	10	4	4	1	5	3	4	9	6	8	4	0	3	6	3	2	40	2	1	2	0	1	1	1	1	2	3	3	3	0	1	0	0	0	0	0
COTU-CM-0413	0	0	0	0	0	0	0	0	0	0	0	0	0	0	0	0	0	0	0	0	0	0	0	0	0	0	0	0	0	0	0	0	2	3	2	0	2	2	7	4	3	2	0	0	0	0	0	0	0
COTU-CM-0414	0	0	0	0	0	0	0	0	0	0	0	0	1	0	0	0	0	0	0	0	0	0	0	0	0	0	0	0	0	0	0	0	15	10	25	11	2	5	56	36	31	58	0	0	0	0	0	0	0
COTU-CM-0415	0	0	0	0	0	0	0	0	0	0	0	0	0	0	0	0	0	0	0	0	0	0	0	0	0	0	0	0	0	0	0	0	9	6	3	5	2	3	0	0	0	3	0	0	0	0	0	0	0
COTU-CM-0417	0	0	0	0	0	0	0	0	0	0	0	0	0	0	0	0	0	0	0	0	0	0	0	0	0	0	0	0	0	0	0	0	0	0	0	0	0	0	0	0	0	0	0	0	0	0	6	0	0
COTU-CM-0418	1	0	0	0	0	0	0	1	0	0	0	0	0	0	0	0	0	0	0	2	0	0	7	0	0	0	0	0	0	0	0	0	0	0	0	0	0	0	0	0	0	0	0	0	0	0	0	0	0
COTU-CM-0419	0	0	0	0	0	0	0	0	0	0	0	0	0	0	0	0	0	0	0	0	0	0	0	0	0	0	0	0	0	0	0	0	121	79	108	71	52	144	107	112	12	19	3	1	0	7	5	0	4
COTU-CM-0420	3	2	1	1	0	0	0	6	0	0	12	15	6	3	2	1	0	0	0	0	0	0	0	0	0	0	3	0	1	0	0	0	0	1	0	1	0	0	0	0	1	2	0	0	0	0	0	0	0
COTU-CM-0421	0	0	0	0	0	0	0	0	0	0	0	0	0	0	0	0	0	0	0	0	0	0	0	0	0	0	0	0	0	0	0	0	2	2	2	2	0	5	4	10	2	12	0	0	0	0	0	0	0
COTU-CM-0425	0	0	0	0	0	0	0	0	0	0	0	0	0	0	0	0	0	0	0	0	0	0	0	0	0	0	0	0	0	0	0	0	7	6	3	0	2	0	7	7	24	19	0	0	0	0	0	0	0
COTU-CM-0426	0	0	0	0	0	0	0	0	0	0	0	0	0	0	0	0	0	0	0	0	0	0	0	0	0	0	0	0	0	0	0	0	7	3	1	2	2	3	0	0	3	1	0	0	0	0	0	0	0
COTU-CM-0429	0	0	0	0	0	0	0	0	0	0	0	0	0	0	0	0	0	0	0	0	0	0	0	0	0	0	0	0	0	0	10	0	0	0	0	0	0	0	0	0	0	0	0	0	0	0	0	0	0
COTU-CM-0433	0	0	0	0	0	0	0	0	0	0	0	0	6	0	0	0	0	0	0	0	0	0	0	0	0	0	0	0	0	0	0	0	0	0	0	0	0	0	0	0	0	0	0	0	0	0	0	0	0
COTU-CM-0434	0	0	0	0	0	0	0	0	0	0	0	0	0	0	6	0	0	0	0	0	0	0	0	0	0	0	0	0	0	0	0	0	0	0	0	0	0	0	0	0	0	0	0	0	0	0	0	0	0
COTU-CM-0435	0	0	0	0	0	0	0	0	0	0	0	0	0	0	0	0	0	0	0	0	0	0	0	0	0	0	0	0	0	0	0	0	0	0	0	0	0	0	0	0	1623	1864	0	0	0	0	0	0	0
COTU-CM-0441	0	1	1	1	0	0	0	11	0	0	0	0	0	0	0	0	1	0	0	0	0	0	0	0	0	0	0	0	0	0	0	0	11	7	9	7	2	5	8	4	3	6	0	0	0	0	0	0	0
COTU-CM-0448	0	0	0	0	0	0	9	9	0	0	146	180	0	0	0	0	0	0	0	0	0	0	7	3	0	0	21	22	0	0	0	0	13	11	14	13	3	10	17	6	8	6	0	0	0	1	0	0	0
COTU-CM-0457	0	0	0	0	0	0	0	0	0	0	0	0	0	0	0	0	0	0	0	0	0	0	0	0	0	0	0	0	0	0	0	0	10	4	6	3	0	1	2	1	0	0	1	0	0	0	0	0	0
COTU-CM-0458	0	0	0	0	0	0	0	0	0	0	0	0	0	0	0	0	0	0	0	0	0	0	0	0	0	0	0	0	0	0	0	0	18	19	24	9	0	8	2	3	0	0	0	0	0	10	0	1	0
COTU-CM-0459	0	0	0	0	0	0	0	0	0	0	0	0	0	0	0	0	0	0	0	0	0	0	0	0	0	0	0	0	0	0	0	0	5	3	7	3	1	3	2	2	0	0	0	0	0	0	0	0	0
COTU-CM-0460	0	0	0	0	0	0	0	0	0	0	0	0	0	0	0	0	0	0	0	0	0	0	0	0	0	0	0	0	0	0	0	0	0	0	0	0	0	0	17	22	0	0	0	0	0	0	0	0	0
COTU-CM-0461	0	0	0	0	0	0	0	0	0	0	0	0	0	0	0	0	0	0	0	0	0	0	0	0	0	0	0	0	0	0	0	0	0	0	0	0	0	0	0	0	14	26	0	0	0	0	0	0	0
COTU-CM-0462	0	0	0	0	0	0	0	0	0	0	0	0	0	0	0	0	0	0	0	0	0	0	0	0	0	0	0	0	0	0	0	0	75	53	80	48	27	51	45	12	25	25	1	0	0	0	2	2	1
COTU-CM-0463	0	0	0	0	0	0	0	0	0	0	0	0	0	0	0	0	0	0	0	0	0	0	0	0	0	0	0	0	0	0	0	0	27	23	32	20	2	10	4	6	1	0	1	0	2	1	0	0	0
COTU-CM-0464	0	1	2	2	3	7	8	7	0	3	2	0	6	6	2	1	0	7	0	21	3	9	10	3	2	9	2	0	3	7	0	11	46	41	51	33	15	32	0	0	0	0	1	0	1	7	3	6	0
COTU-CM-0466	3	4	3	4	3	5	10	8	1	3	1	0	5	3	0	0	0	0	0	8	0	0	15	0	0	9	0	0	0	8	0	10	50	41	46	17	12	27	0	0	0	0	0	3	2	6	8	4	0
COTU-CM-0470	0	0	0	0	0	0	0	0	13	16	0	0	0	0	0	0	0	0	0	0	0	0	0	0	2	11	0	0	0	0	0	0	2	2	3	2	2	4	4	3	9	4	0	0	0	0	0	0	0
COTU-CM-0471	0	0	0	0	0	0	0	0	0	0	0	0	0	0	0	0	0	0	0	0	0	0	0	0	0	0	0	0	0	0	0	0	20	18	23	35	12	25	392	508	389	585	0	0	0	0	1	0	1
COTU-CM-0472	0	0	0	0	0	0	0	0	0	0	0	0	0	0	0	0	0	0	0	0	0	0	0	0	0	0	0	0	0	0	0	0	123	86	94	80	40	116	0	0	13	24	4	6	5	38	33	30	0
COTU-CM-0473	0	0	0	0	0	0	0	0	0	0	0	0	0	0	0	0	0	0	0	0	0	0	0	0	0	0	0	0	0	0	0	0	0	0	0	0	0	0	6	12	2	3	0	0	0	0	0	0	0
COTU-CM-0475	0	0	0	0	0	0	0	0	0	0	1	1	0	0	0	0	0	0	0	0	0	0	0	0	0	0	1	1	0	0	0	0	3	6	12	3	1	6	1	3	2	0	1	0	0	0	0	0	0
COTU-CM-0478	0	0	0	0	0	0	0	0	0	0	0	0	0	0	0	0	0	0	0	0	0	0	0	0	0	0	0	0	0	0	0	0	2	3	0	2	2	4	6	2	0	0	0	0	0	0	0	0	0
COTU-CM-0479	0	0	0	0	0	0	0	0	0	0	0	0	0	0	0	0	0	0	0	0	0	0	0	0	0	0	0	0	0	0	0	0	15	6	12	2	0	8	6	3	12	17	0	0	0	3	0	0	0
COTU-CM-0480	0	0	0	0	0	0	0	0	0	0	0	0	0	0	0	0	0	0	0	0	0	0	0	0	0	0	0	0	0	0	0	0	4	2	0	3	0	5	0	0	1	0	0	0	0	0	0	0	0
COTU-CM-0481	0	0	0	0	0	0	0	0	0	0	0	0	0	0	0	0	0	0	0	0	0	0	0	0	0	0	0	0	0	0	0	0	0	0	1	0	0	0	91	97	542	669	0	0	0	0	0	0	1
COTU-CM-0482	0	0	0	0	0	0	0	0	0	0	0	0	0	0	0	0	0	0	0	0	0	0	0	0	0	0	0	0	0	0	0	0	44	45	36	18	15	24	0	0	33	64	2	2	0	3	1	2	1
COTU-CM-0483	0	1	0	0	2	0	1	0	0	0	0	1	1	0	0	2	0	1	0	0	0	0	0	0	0	0	0	0	0	1	0	0	1	1	0	5	0	6	2	0	2	1	0	0	1	0	0	0	0
COTU-CM-0484	0	0	0	0	0	0	0	0	0	0	0	0	0	0	0	0	0	0	0	0	0	0	0	0	0	0	0	0	0	0	0	0	0	0	0	0	0	0	4	9	0	0	0	0	0	0	0	0	0
COTU-CM-0500	0	0	0	0	0	0	0	0	0	0	0	0	0	0	0	0	0	0	0	0	0	0	0	0	0	0	0	0	0	0	0	0	0	0	0	0	0	0	0	7	0	0	0	0	0	0	0	0	0
COTU-CM-0501	0	0	0	0	3	0	0	0	0	0	1	1	0	0	0	0	0	0	0	0	0	1	0	0	0	0	0	0	1	0	0	0	3	3	1	6	1	0	2	2	0	0	0	0	0	0	1	0	0
COTU-CM-0502	0	0	0	0	0	0	0	0	0	0	0	0	0	0	0	0	0	0	0	0	0	0	0	0	0	0	0	0	0	0	0	0	9	5	5	5	0	3	25	18	1	2	0	0	0	0	0	0	0
COTU-CM-0503	0	0	0	0	0	0	0	0	0	0	0	0	0	0	0	0	0	0	0	0	0	0	0	0	0	0	0	0	0	0	0	0	1	0	1	0	0	0	48	66	25	29	0	0	0	0	0	0	0
COTU-CM-0504	0	0	0	0	0	0	0	0	0	0	0	0	0	0	0	0	0	0	0	0	0	0	0	0	0	0	0	0	0	0	0	0	4	3	4	2	2	2	227	61	112	86	0	0	0	0	0	0	0
COTU-CM-0505	0	0	0	0	0	0	0	0	0	0	0	0	0	0	0	0	0	0	0	0	0	0	0	0	0	0	0	0	0	0	0	0	2	0	2	3	0	2	1	1	16	10	0	0	0	0	0	0	0
COTU-CM-0506	0	0	0	0	0	0	0	0	0	0	0	0	0	0	0	0	0	0	0	0	0	0	0	0	0	0	0	0	0	0	0	0	431	325	361	210	77	200	340	150	312	353	2	0	0	1	1	2	0
COTU-CM-0508	0	0	0	0	0	0	0	0	0	6	6	0	3	7	0	6	0	0	0	0	0	0	0	0	2	3	1	0	1	1	0	5	0	0	0	0	0	0	0	0	0	0	0	0	0	0	0	0	0
COTU-CM-0509	0	0	0	0	0	0	0	0	10	45	6	2	5	9	4	43	0	0	0	0	0	0	0	0	31	16	2	0	1	3	2	28	0	0	0	0	0	0	0	0	0	0	0	0	0	0	0	0	0
COTU-CM-0510	0	0	0	0	0	0	0	0	0	0	0	0	0	0	0	0	0	0	0	0	0	0	0	0	0	0	0	0	0	0	0	0	0	0	1	0	0	3	1	0	4	8	0	0	0	0	0	0	0
COTU-CM-0513	0	0	0	0	0	0	0	0	0	0	0	0	0	0	0	0	0	0	0	0	0	0	0	0	0	0	0	0	0	0	0	0	13	13	9	12	6	19	0	1	18	56	0	0	0	0	0	0	0
COTU-CM-0514	0	0	0	0	0	0	0	0	0	0	0	0	0	0	0	0	0	0	0	0	0	0	0	0	0	0	0	0	0	0	0	0	3	2	1	5	0	1	36	24	0	2	0	0	0	0	0	0	0
COTU-CM-0515	0	0	0	0	0	0	0	0	0	0	0	0	0	0	0	0	0	0	0	0	0	0	0	0	0	0	0	0	0	0	0	0	41	29	20	8	13	11	1	0	0	0	0	0	0	2	0	1	0
COTU-CM-0516	0	0	0	0	0	0	0	0	0	0	0	0	0	0	0	0	0	0	0	0	0	0	0	0	0	0	0	0	0	0	0	0	0	0	0	0	0	0	277	126	2	3	0	0	0	0	0	0	5
COTU-CM-0517	0	0	0	0	0	0	2	0	0	0	1	1	0	0	0	0	0	0	0	0	0	0	0	0	0	0	3	0	0	0	0	0	2	2	0	0	0	0	7	1	2	1	0	0	0	0	0	0	0
COTU-CM-0518	0	0	0	0	0	0	0	0	0	0	0	0	0	0	0	0	0	0	0	0	0	0	0	0	0	0	0	0	0	0	0	0	12	11	16	1	0	1	0	0	0	0	0	0	0	0	0	0	0
COTU-CM-0519	0	0	0	0	0	0	0	0	0	0	0	0	0	0	0	0	0	0	0	0	0	0	0	0	0	0	0	0	0	0	0	0	12	4	6	4	0	2	1	0	9	16	1	0	1	0	1	1	0
COTU-CM-0520	1	2	1	1	0	0	0	0	2	2	0	4	0	0	0	1	0	2	0	0	0	0	1	0	0	1	1	0	0	0	0	3	1	2	0	0	1	0	0	0	2	22	0	0	0	0	0	0	0
COTU-CM-0527	0	0	2	1	0	0	0	0	0	0	0	0	0	0	3	1	0	0	0	0	0	0	0	0	0	0	0	0	0	0	0	0	30	26	26	29	3	23	8	4	2	1	0	0	0	0	0	0	0
COTU-CM-0529	1	4	0	13	4	4	15	9	0	0	0	0	0	0	0	0	0	3	1	5	1	5	5	5	0	0	0	0	0	0	0	0	0	0	0	0	0	0	0	0	0	0	0	0	0	0	0	0	0
COTU-CM-0530	0	0	0	0	0	0	0	0	0	0	0	0	0	0	0	0	0	0	0	0	0	0	0	0	0	0	0	0	0	0	0	0	403	279	356	202	93	266	2	2	1	0	1	1	1	7	5	2	0
COTU-CM-0531	0	0	0	0	0	0	0	0	0	0	0	0	0	0	0	0	0	0	0	0	0	0	0	0	0	0	0	0	0	0	0	0	0	0	0	0	0	2	0	2	3	8	0	0	0	0	0	0	0
COTU-CM-0532	0	0	0	0	7	6	10	14	0	0	0	0	0	0	0	0	0	0	0	0	2	0	5	1	0	0	0	0	0	0	0	0	0	0	0	0	0	0	0	0	0	0	0	0	0	0	0	0	0
COTU-CM-0535	0	0	0	0	0	0	0	0	0	0	0	0	0	0	0	0	0	0	0	0	0	0	0	0	0	0	0	0	0	0	0	0	54	34	49	16	10	29	62	58	28	25	0	0	0	0	0	0	0
COTU-CM-0539	0	0	0	0	0	0	0	0	0	0	0	0	0	0	0	0	0	0	0	0	0	0	0	0	0	0	0	0	0	0	0	0	8	3	4	6	1	9	16	17	3	4	0	0	0	0	0	0	0
COTU-CM-0540	3	1	0	0	1	0	0	0	0	0	11	2	0	0	0	0	0	2	0	0	0	1	0	0	0	0	0	0	0	0	0	2	0	1	0	0	0	0	1	0	0	0	0	0	0	0	0	0	0
COTU-CM-0541	16	20	31	41	5	3	20	28	2	3	52	51	16	9	13	10	1	12	9	14	2	1	3	5	1	1	8	1	2	4	2	6	2	5	3	1	1	2	5	5	1	3	0	0	0	0	0	0	0
COTU-CM-0542	0	0	0	0	0	0	0	0	0	0	0	0	6	0	0	0	0	0	0	0	0	0	0	0	0	0	0	0	0	0	0	0	0	0	0	0	0	0	0	0	0	0	0	0	0	0	0	0	0
COTU-CM-0545	0	0	0	0	0	0	0	0	0	0	0	0	0	0	0	0	0	0	0	0	0	0	0	0	0	0	0	0	0	0	0	0	7	6	2	8	2	3	4	5	11	13	0	0	0	0	0	0	0
COTU-CM-0547	0	0	0	0	6	2	5	15	0	0	0	0	0	0	0	0	0	0	0	0	1	3	2	4	0	0	0	0	0	0	0	0	0	0	0	0	0	0	0	0	0	0	0	0	0	0	0	0	0
COTU-CM-0548	0	0	0	0	1	1	6	9	0	0	0	0	0	0	0	0	0	0	0	0	3	1	1	2	0	0	0	0	0	0	0	0	0	0	0	0	0	0	0	0	0	0	0	0	0	0	0	0	0
COTU-CM-0549	0	0	0	0	0	0	0	0	0	0	0	0	0	0	0	0	0	0	0	0	0	0	0	0	0	0	0	0	0	0	0	0	0	1	0	0	0	1	15	6	1	3	0	0	0	0	0	0	0
COTU-CM-0550	0	0	0	0	0	0	0	0	0	0	0	0	0	0	0	0	0	0	0	0	0	0	0	0	0	0	0	0	0	0	0	0	0	4	1	0	0	1	20	15	3	12	0	0	0	0	0	0	0
COTU-CM-0551	0	0	0	0	0	0	0	0	0	0	51	27	0	0	13	21	0	0	0	0	0	0	0	0	0	0	5	1	0	0	5	7	0	0	0	0	0	0	0	0	0	0	0	0	0	0	0	0	0
COTU-CM-0552	0	0	0	0	175	112	8	16	0	0	90	66	2	2	46	20	0	0	0	0	40	32	7	7	0	0	10	5	0	0	17	20	0	0	0	0	0	0	0	0	0	0	0	0	0	0	0	0	0
COTU-CM-0553	0	0	0	0	0	0	0	0	0	0	0	0	0	0	0	0	0	0	0	0	0	0	0	0	0	0	0	0	0	0	0	0	0	0	0	0	0	0	20	17	0	0	0	0	0	0	0	0	0
COTU-CM-0554	0	0	0	0	0	0	0	0	0	0	0	0	0	0	0	0	0	0	0	0	0	0	0	0	0	0	0	0	0	0	0	0	2	3	3	0	1	1	5	3	25	32	0	0	0	0	0	0	0
COTU-CM-0555	0	0	0	0	0	0	0	0	0	0	0	0	0	0	0	0	0	0	0	0	0	0	0	0	0	0	0	0	0	0	0	0	5	3	2	3	0	2	13	10	9	10	0	0	1	0	0	0	0
COTU-CM-0556	0	0	2	3	0	2	2	0	3	2	2	0	2	1	1	0	0	0	0	0	0	1	0	0	0	3	1	1	0	2	1	0	5	13	7	9	3	10	7	8	9	8	0	0	0	0	0	0	1
COTU-CM-0557	0	0	0	0	0	0	0	0	1	0	0	0	0	0	0	0	0	0	0	0	0	0	0	0	0	0	0	0	0	0	0	0	1	4	4	5	3	1	6	4	3	3	0	0	0	0	0	0	0
COTU-CM-0558	0	0	0	0	0	0	0	0	0	0	0	1	0	0	0	25	0	0	1	0	0	0	0	0	0	1	0	0	0	0	0	0	0	0	0	0	0	0	0	0	0	0	0	0	0	0	0	0	0
COTU-CM-0559	55	95	207	161	213	107	26	34	65	61	84	93	182	189	169	92	7	48	25	69	47	38	6	9	26	41	20	4	71	68	36	49	0	0	1	1	0	0	5	1	5	9	0	0	0	0	0	1	2
COTU-CM-0560	0	0	0	0	58	36	6	5	0	0	56	21	2	0	19	7	0	0	0	0	8	11	2	0	0	0	9	3	0	0	4	3	0	0	0	0	0	0	0	0	0	0	0	0	0	0	0	0	0
COTU-CM-0564	0	0	0	0	0	0	0	0	0	0	0	0	0	0	0	0	0	0	0	0	0	0	0	0	0	0	0	0	0	0	0	0	18	12	16	7	5	12	0	0	0	0	0	0	0	0	0	0	0
COTU-CM-0565	0	0	0	0	0	0	0	0	0	0	0	0	0	0	0	0	0	0	0	0	0	0	0	0	0	0	0	0	0	0	0	0	3	4	3	2	0	6	0	0	1	0	0	0	0	0	0	0	0
COTU-CM-0570	0	0	0	0	0	0	0	0	0	0	0	0	0	0	0	0	0	0	0	0	0	0	0	0	0	0	0	0	0	0	0	0	170	173	136	100	27	122	0	0	25	25	1	1	0	0	0	1	0
COTU-CM-0571	0	0	0	0	4	3	8	9	0	0	0	0	0	0	0	0	0	0	0	0	0	1	1	6	0	0	0	0	0	0	0	0	0	0	0	0	0	0	0	0	0	0	0	0	0	0	0	0	0
COTU-CM-0572	5	11	10	16	0	2	4	4	15	16	0	6	2	3	23	27	2	6	0	4	0	0	1	0	5	11	1	0	2	0	5	9	6	6	4	4	0	5	9	13	5	4	0	0	0	0	0	0	0
COTU-CM-0573	0	0	0	0	0	0	0	0	0	0	0	0	0	0	0	0	0	0	0	0	0	0	0	0	0	0	0	0	0	0	0	0	30	43	28	18	8	24	353	358	8	7	0	0	0	0	0	0	0
COTU-CM-0574	0	0	0	0	0	0	0	0	0	0	0	0	0	0	0	0	0	0	0	0	0	0	0	0	0	0	0	0	0	0	0	0	0	0	0	0	0	0	7	1	1	1	0	0	0	0	0	0	0
COTU-CM-0575	7	22	53	27	17	14	23	38	26	21	66	59	90	63	16	45	1	13	4	5	10	4	6	10	9	21	10	2	19	38	1	27	4	3	2	0	2	1	2	0	5	6	0	0	0	0	1	0	0
COTU-CM-0576	4	5	3	5	2	1	4	1	1	0	0	2	0	0	2	2	0	0	0	1	1	0	0	3	0	0	0	1	0	0	1	1	4	1	0	2	0	1	3	3	12	21	0	0	0	0	0	0	0
COTU-CM-0577	0	0	0	0	0	0	0	0	0	0	0	0	1	0	0	0	0	0	0	0	0	0	0	0	0	0	0	0	1	1	0	0	3	1	1	0	0	2	0	0	13	8	0	0	0	0	0	0	0
COTU-CM-0581	19	27	67	86	12	10	14	13	91	87	32	19	4	5	95	88	5	21	10	19	4	5	10	11	49	58	10	9	0	3	38	59	6	1	2	1	3	0	5	11	5	4	0	0	0	0	0	0	0
COTU-CM-0582	0	0	0	0	0	0	0	0	0	0	0	0	8	0	0	0	0	0	0	0	0	0	0	0	0	0	0	0	0	0	0	0	0	0	0	0	0	0	0	0	0	0	0	0	0	0	0	0	0
COTU-CM-0585	0	0	0	0	0	0	0	0	0	0	0	0	0	0	0	0	0	0	0	0	0	0	0	0	0	0	0	0	0	0	0	0	0	1	0	0	0	2	0	11	2	0	0	0	0	0	0	0	0
COTU-CM-0586	0	0	0	0	0	0	0	0	0	0	0	0	0	0	0	0	0	0	0	0	0	0	0	0	0	0	0	0	0	0	0	0	0	0	0	0	0	0	0	0	0	0	0	0	0	6	0	0	0
COTU-CM-0589	0	0	0	0	0	0	0	0	0	0	0	0	0	0	0	0	0	0	0	0	0	0	0	0	0	0	0	0	0	0	0	0	3	2	5	3	2	8	0	5	2	1	0	0	0	0	0	0	0
COTU-CM-0590	1	0	0	0	0	0	0	0	0	0	4	1	0	0	0	0	0	0	0	0	0	0	0	0	0	0	0	0	0	0	0	0	5	3	2	5	0	3	1	2	2	6	0	0	0	0	0	0	0
COTU-CM-0592	0	0	0	0	0	0	0	0	0	0	0	0	6	0	0	0	0	0	0	0	0	0	0	0	0	0	0	0	0	0	0	0	0	0	0	0	0	0	0	0	0	0	0	0	0	0	0	0	0
COTU-CM-0595	5	3	0	0	0	0	0	0	0	0	1	0	2	0	8	3	1	0	0	0	0	0	0	0	0	0	0	0	0	0	2	2	0	0	0	0	0	0	0	0	0	0	0	0	0	0	0	0	0
COTU-CM-0598	0	0	0	0	0	0	0	0	0	0	0	0	0	0	0	0	0	0	0	0	0	0	0	0	0	0	0	0	0	0	0	0	35	17	21	17	7	26	0	0	3	11	0	0	0	9	1	1	0
COTU-CM-0599	4	1	0	1	1	0	6	6	4	3	2	6	4	6	1	6	0	0	0	0	0	0	0	2	0	0	0	1	2	2	0	2	1	1	0	2	1	1	0	0	7	17	0	0	0	1	0	0	0
COTU-CM-0600	0	0	0	0	0	0	0	0	0	0	0	0	0	0	0	0	0	0	0	0	0	0	0	0	0	0	0	0	0	0	0	0	2	4	0	1	1	3	5	6	1	1	0	0	0	0	0	0	0
COTU-CM-0602	0	0	0	0	0	0	0	0	0	0	0	0	0	0	0	0	0	0	0	0	0	0	0	0	0	0	0	0	0	0	0	0	0	1	2	1	0	1	6	10	2	4	0	0	0	0	0	0	0
COTU-CM-0607	0	3	0	1	2	0	0	2	0	0	8	5	2	1	0	1	0	0	0	0	0	0	0	0	0	0	8	1	2	0	0	0	11	7	7	4	3	6	12	3	2	0	0	0	0	0	0	0	0
COTU-CM-0608	0	0	0	0	0	0	0	0	0	0	0	0	0	0	0	0	0	0	0	0	0	0	0	0	0	0	0	0	0	0	0	0	2	1	1	0	2	3	0	0	7	18	0	0	0	0	0	0	0
COTU-CM-0613	3	4	1	2	1	1	37	68	0	1	10	11	1	0	1	1	1	1	0	1	0	0	9	18	0	0	2	0	1	0	0	0	2	0	6	2	0	1	0	0	7	14	0	0	0	0	0	0	0
COTU-CM-0614	17	26	5	9	27	18	13	20	1	1	119	81	72	85	2	1	4	33	1	3	10	10	6	5	4	2	25	13	43	34	4	2	57	49	45	47	16	48	37	42	19	26	0	2	0	0	3	0	0
COTU-CM-0615	0	0	0	0	0	0	0	0	0	0	0	0	0	0	0	0	0	0	0	0	0	0	0	0	0	0	0	0	0	0	0	0	11	5	5	9	0	9	10	6	17	32	0	0	0	0	0	0	0
COTU-CM-0616	0	0	0	0	0	0	0	0	0	0	0	0	0	0	0	0	0	0	0	0	0	0	0	0	0	0	0	0	0	0	0	0	0	0	3	0	0	0	0	1	1	9	0	0	0	0	0	0	0
COTU-CM-0617	0	0	0	0	0	0	0	0	0	0	0	0	0	0	0	0	0	0	0	0	0	0	0	0	0	0	0	0	0	0	0	0	1	0	0	1	0	0	5	2	2	16	0	0	0	0	0	0	0
COTU-CM-0618	0	0	0	0	0	0	0	0	0	0	0	0	0	0	0	0	0	0	0	0	0	0	0	0	0	0	0	0	0	0	0	0	0	0	0	0	0	0	0	0	0	0	0	0	0	0	0	6	0
COTU-CM-0619	0	0	0	0	0	0	0	0	0	0	0	0	0	0	0	1	0	0	0	0	0	0	0	0	0	0	0	0	0	0	0	0	859	591	701	959	363	1146	226	411	166	485	9	25	11	39	61	38	15
COTU-CM-0620	0	0	0	0	0	0	0	0	0	0	0	0	0	0	0	0	0	0	0	0	0	0	0	0	0	0	0	0	0	0	0	0	0	0	0	0	0	0	0	7	0	0	0	0	0	0	0	0	0
COTU-CM-0621	0	1	0	1	1	0	27	32	0	0	8	6	0	10	3	2	0	1	0	0	0	0	4	6	0	0	0	1	0	0	0	0	0	0	0	0	0	0	0	0	0	0	0	0	0	0	0	0	0
COTU-CM-0622	0	0	0	0	0	0	0	0	0	0	0	0	15	20	0	0	0	0	0	0	0	0	0	0	0	0	0	0	3	8	0	0	0	0	0	0	0	0	0	0	0	0	0	0	0	0	0	0	0
COTU-CM-0623	0	0	0	0	0	0	0	0	0	0	0	0	0	0	0	0	0	0	0	0	0	0	0	0	0	0	0	0	0	0	0	0	5	0	6	2	2	4	0	1	1	3	0	0	0	0	0	0	0
COTU-CM-0624	8	27	40	216	0	0	16	45	0	0	0	0	0	0	0	0	2	21	3	66	0	0	5	11	0	0	0	0	0	0	0	0	7	8	3	2	1	4	6	4	0	1	0	0	0	0	0	0	0
COTU-CM-0625	0	0	0	0	0	0	0	0	0	0	0	0	0	0	0	0	0	0	0	0	0	0	0	0	0	0	0	0	0	0	0	0	2	2	1	0	0	6	1	6	0	1	0	0	0	0	0	0	0
COTU-CM-0626	12	42	34	248	0	0	19	35	0	0	0	0	0	0	0	0	1	29	3	90	0	0	6	7	0	0	0	0	0	0	0	0	19	10	8	7	4	5	11	6	1	0	0	0	0	0	0	0	0
COTU-CM-0628	0	0	0	0	0	0	41	25	9	25	32	3	24	56	0	0	0	1	0	0	0	0	14	7	12	22	19	2	13	17	0	0	0	0	0	0	0	0	0	0	1	4	0	0	0	0	0	0	0
COTU-CM-0629	0	1	0	0	0	0	36	39	14	25	22	4	8	28	0	0	0	3	0	0	0	0	18	10	2	24	10	1	8	8	0	0	1	0	0	0	0	0	0	1	1	4	0	0	0	0	0	0	0
COTU-CM-0630	0	0	0	0	0	0	1	0	0	0	1	1	0	0	1	0	0	0	0	3	0	0	0	0	0	0	0	1	0	0	0	0	2	2	2	1	0	6	2	1	0	0	0	0	0	0	0	0	1
COTU-CM-0631	0	0	0	0	0	0	0	0	0	0	0	0	0	0	0	0	0	0	0	0	0	0	0	0	0	0	0	0	0	0	0	0	1	0	0	1	0	3	3	6	0	1	0	0	0	0	0	0	0
COTU-CM-0632	2	2	0	0	0	0	3	5	0	0	0	2	3	1	4	1	0	3	0	0	0	0	0	1	0	1	0	0	0	0	0	0	3	5	0	1	0	6	1	9	4	7	0	0	0	0	0	0	0
COTU-CM-0633	0	0	0	0	0	0	0	0	0	0	0	0	0	0	0	0	0	0	0	0	0	0	0	0	0	0	0	0	0	0	0	0	3	1	4	1	0	3	8	3	7	12	0	0	0	1	1	1	0
COTU-CM-0634	0	0	0	0	0	0	0	0	0	0	0	0	7	0	0	0	0	0	0	0	0	0	0	0	0	0	0	0	3	0	0	0	0	0	0	0	0	0	0	0	0	0	0	0	0	0	0	0	0
COTU-CM-0635	39	2	53	0	30	3	58	8	88	12	63	2	69	13	15	4	3	15	28	5	16	5	66	6	58	8	11	1	27	11	9	6	1	0	0	0	0	0	1	0	0	0	0	0	0	1	0	0	0
COTU-CM-0636	0	0	0	6	0	0	0	0	0	0	0	0	0	0	0	0	0	0	0	0	0	0	0	0	0	0	0	0	0	0	0	0	0	0	0	0	0	0	0	0	0	0	0	0	0	0	0	0	0
COTU-CM-0637	0	0	0	0	0	0	0	0	0	0	0	0	0	0	0	0	0	0	0	0	0	0	0	0	0	0	0	0	0	0	0	0	0	0	0	0	0	0	0	0	0	0	0	0	0	0	0	6	0
COTU-CM-0638	0	0	0	0	0	0	0	0	0	0	0	0	0	0	0	0	0	0	0	0	0	0	0	0	0	0	0	0	0	0	0	0	0	0	0	0	0	0	0	0	0	0	0	0	0	0	6	0	0
COTU-CM-0639	0	0	0	0	0	0	0	0	0	0	0	0	0	0	0	0	0	0	0	0	0	0	0	0	0	0	0	0	0	0	0	0	103	93	63	41	26	55	168	73	181	133	3	2	4	3	6	3	17
COTU-CM-0640	0	0	0	0	0	0	0	0	0	0	0	0	0	0	0	0	0	0	0	0	0	0	0	0	0	0	0	0	0	0	0	0	5	3	2	4	2	5	8	4	0	3	0	0	0	0	0	0	0
COTU-CM-0641	0	0	0	0	0	0	0	0	0	0	0	0	0	0	0	0	0	0	0	0	0	0	0	0	0	0	0	0	0	0	0	0	10	3	3	5	0	4	78	17	17	11	2	1	2	1	0	0	6
COTU-CM-0642	0	0	0	0	0	0	0	0	0	0	0	0	0	0	0	0	0	0	0	0	0	0	0	0	0	0	0	0	0	0	0	0	27	31	25	11	3	8	140	6	6	0	5	4	2	0	3	1	27
COTU-CM-0643	0	0	0	0	0	0	0	0	0	0	0	0	0	0	0	0	0	0	0	0	0	0	0	0	0	0	0	0	0	0	0	0	19	6	10	16	9	19	151	17	3	5	0	3	0	0	2	0	14
COTU-CM-0644	0	0	0	0	0	0	0	0	0	0	0	0	0	0	0	0	0	0	0	0	0	0	0	0	0	0	0	0	0	0	0	0	0	1	1	0	0	1	0	1	1	0	0	0	0	0	0	0	0
COTU-CM-0645	0	0	0	0	0	0	0	0	0	0	0	0	0	0	0	0	0	0	0	0	0	0	0	0	0	0	0	0	0	0	0	0	3	7	4	10	3	9	15	5	3	44	0	0	0	0	0	0	0
COTU-CM-0649	0	0	0	0	0	0	0	0	0	0	0	0	0	0	0	0	0	0	0	0	0	0	0	0	0	0	0	0	0	0	0	0	1	0	0	1	2	3	4	5	5	18	0	0	0	0	0	0	0
COTU-CM-0650	0	0	0	0	0	0	0	0	0	0	0	0	0	0	0	0	0	0	0	0	0	0	0	0	0	0	0	0	0	0	0	0	1	1	2	0	0	1	0	2	1	7	0	0	0	0	0	0	0
COTU-CM-0651	0	0	0	0	0	0	0	0	0	0	0	0	0	0	0	0	0	0	0	0	0	0	0	0	0	0	0	0	0	0	0	0	1	1	0	2	0	4	5	1	0	5	0	0	0	0	0	0	0
COTU-CM-0652	0	0	0	0	0	0	0	0	0	0	0	0	0	0	0	0	0	0	0	0	0	0	0	0	0	0	0	0	0	0	0	0	0	0	0	0	0	0	0	0	0	0	0	0	0	0	0	0	0
COTU-CM-0653	0	0	0	0	0	0	0	1	0	0	0	0	1	0	0	0	0	0	0	1	0	0	0	0	0	0	0	0	1	1	0	1	6	6	2	3	2	8	3	0	0	0	0	0	0	2	0	1	0
COTU-CM-0654	0	0	0	0	0	0	0	2	0	0	0	0	0	0	1	0	0	0	0	2	0	0	0	0	0	1	0	0	0	0	0	0	15	12	10	13	4	12	3	2	0	0	1	0	0	2	2	3	0
COTU-CM-0655	0	0	0	0	0	0	0	0	0	0	0	0	0	0	0	0	0	0	0	0	0	0	0	0	0	0	0	0	0	0	0	0	6	11	5	3	2	5	3	0	0	0	0	0	1	0	1	0	0
COTU-CM-0656	0	0	0	0	0	0	0	0	0	0	0	0	0	0	0	0	0	0	0	0	0	0	0	0	0	0	0	0	0	0	0	0	1	2	2	3	1	1	23	34	79	197	0	0	0	0	0	0	0
COTU-CM-0657	0	0	0	0	0	0	0	0	0	0	0	0	0	0	0	0	0	0	0	0	0	0	0	0	0	0	0	0	0	0	0	0	0	0	2	0	0	0	11	11	0	0	0	0	0	0	0	0	0
COTU-CM-0658	0	0	0	0	0	0	0	0	0	0	0	0	0	0	0	0	0	0	0	0	0	0	0	0	0	0	0	0	0	0	0	0	0	0	1	0	1	0	17	8	0	0	0	0	0	0	0	0	0
COTU-CM-0659	0	0	0	0	0	0	0	0	0	0	0	0	0	0	0	0	0	0	0	0	0	0	0	0	0	0	0	0	0	0	0	0	0	2	0	1	0	2	23	8	0	0	0	0	0	0	0	0	0
COTU-CM-0660	0	0	0	0	0	0	0	0	0	0	0	7	0	0	0	0	0	0	0	0	0	1	0	0	0	0	0	0	0	0	0	0	0	0	0	0	0	0	0	0	0	0	0	0	0	0	0	0	0
COTU-CM-0661	268	356	256	152	406	233	2	1	201	133	323	322	166	226	444	157	50	165	25	63	117	68	1	2	96	73	58	50	166	111	80	118	3	1	3	1	0	0	1	0	1	0	0	0	0	0	0	0	0
COTU-CM-0662	0	0	0	0	0	0	0	0	0	0	0	0	0	0	0	0	0	0	0	0	0	0	0	0	0	0	0	0	0	0	0	0	14	9	8	10	6	19	0	0	12	57	0	0	0	0	0	0	0
COTU-CM-0663	1	3	0	2	7	2	0	1	0	2	0	0	1	2	2	0	2	1	0	2	0	0	0	0	1	0	1	0	1	3	0	1	2	1	5	1	1	2	8	4	1	3	0	0	0	0	0	0	0
COTU-CM-0664	0	0	1	0	0	0	2	0	0	1	1	1	0	1	0	0	0	1	1	0	0	0	0	0	0	2	0	0	0	0	0	0	18	14	14	9	3	12	16	16	8	43	0	0	0	0	0	0	0
COTU-CM-0665	0	0	0	0	0	0	0	0	0	0	0	0	0	0	0	0	0	0	0	0	0	0	0	0	0	0	0	0	0	0	0	0	6	1	2	1	0	2	3	2	0	2	0	0	0	0	0	0	1
COTU-CM-0666	0	0	0	0	0	0	0	0	0	0	0	0	0	0	0	0	0	0	0	0	0	0	0	0	0	0	0	0	0	0	0	0	2	3	2	1	0	2	45	36	4	15	0	0	0	0	1	0	0
COTU-CM-0667	0	0	0	0	0	0	0	0	0	0	0	0	0	0	0	0	0	0	0	0	0	0	0	0	0	0	0	0	0	0	0	0	2	1	2	1	0	2	14	25	2	12	0	0	0	1	0	0	0
COTU-CM-0668	0	0	0	0	0	0	0	0	0	0	0	0	0	0	0	0	0	0	0	0	0	0	0	0	0	0	0	0	0	0	0	0	0	2	1	0	0	0	27	15	3	7	0	0	0	0	0	0	0
COTU-CM-0669	0	0	0	0	0	0	0	0	1	0	0	0	0	0	0	0	0	0	0	0	0	0	0	0	0	0	0	0	0	0	0	6	0	0	0	0	0	0	0	0	0	0	0	0	0	0	0	0	0
COTU-CM-0670	53	25	94	87	50	34	69	63	16	18	77	68	35	11	45	208	10	46	15	139	22	35	44	39	10	25	32	42	14	14	22	286	0	0	0	0	0	0	0	0	0	0	0	0	0	0	0	0	0
COTU-CM-0671	0	0	0	0	0	0	0	0	0	0	0	0	0	0	0	0	0	0	0	0	0	0	0	0	0	18	0	0	0	0	0	0	0	0	0	0	0	0	0	0	0	0	0	0	0	0	0	0	0
COTU-CM-0672	5	5	4	7	1	3	4	8	5	3	4	14	6	12	5	5	3	9	0	3	1	1	2	3	4	1	7	1	2	10	1	2	0	0	0	2	0	0	1	0	0	2	0	0	0	0	0	0	0
COTU-CM-0673	0	0	0	0	0	0	0	0	0	0	0	0	0	0	0	0	0	0	0	0	0	0	0	0	0	0	0	0	0	0	0	0	14	4	6	11	2	11	1	0	10	8	0	0	0	1	0	1	0
COTU-CM-0677	0	2	1	2	0	0	0	0	0	0	0	0	0	0	0	0	0	0	0	3	0	0	0	0	0	0	0	0	0	0	0	0	1	2	1	2	2	6	30	46	2	24	0	0	0	0	1	1	0
COTU-CM-0678	0	0	0	0	0	0	0	0	0	0	0	0	0	0	0	0	0	0	0	0	0	0	0	0	0	0	0	0	0	0	0	0	0	0	0	0	0	0	7	4	2	1	0	0	0	0	0	0	0
COTU-CM-0679	0	0	0	0	0	0	0	0	0	0	0	0	0	0	0	0	0	0	0	0	0	0	0	0	0	0	0	0	0	0	0	0	4	1	2	2	3	1	9	1	0	0	0	0	0	0	0	0	0
COTU-CM-0680	0	0	0	0	0	0	0	0	0	0	0	0	0	0	0	0	0	0	0	0	0	0	0	0	0	0	0	0	0	0	0	0	1	1	0	0	0	3	10	11	1	12	0	0	0	0	0	0	0
COTU-CM-0683	0	0	0	0	0	0	0	0	0	0	0	0	0	0	0	0	0	0	0	0	0	0	0	0	0	0	0	0	0	0	0	0	0	1	0	0	0	1	23	15	8	4	0	0	0	0	2	0	0
COTU-CM-0684	0	0	0	0	0	0	0	0	0	0	0	0	0	0	0	0	0	0	0	0	0	0	0	0	0	0	0	0	0	0	0	0	1	0	4	0	1	0	36	26	6	10	0	0	0	0	0	0	1
COTU-CM-0685	0	0	0	0	0	0	0	0	0	0	0	0	0	0	0	0	0	0	0	0	0	0	0	0	0	0	0	0	0	0	0	0	1	0	1	0	0	1	29	18	5	11	0	0	0	0	0	0	0
COTU-CM-0686	0	0	0	0	0	0	0	0	0	0	0	0	0	0	0	0	0	0	0	0	0	0	0	0	0	0	0	0	0	0	0	0	0	0	0	0	0	0	16	8	4	9	0	0	0	0	0	0	0
COTU-CM-0687	0	0	0	0	0	0	0	6	0	0	0	0	0	0	0	0	0	0	0	0	0	0	0	0	0	0	0	0	0	0	0	0	0	0	0	0	0	0	0	0	0	0	0	0	0	0	0	0	0
COTU-CM-0689	7	0	20	1	4	0	2	2	3	1	5	0	2	3	1	1	0	4	4	0	0	0	2	0	0	0	7	0	2	2	0	0	0	0	0	0	0	0	0	0	0	0	0	0	0	0	0	0	0
COTU-CM-0691	0	0	0	0	0	0	0	0	0	0	0	0	0	0	0	0	0	0	0	0	0	0	0	0	13	0	0	0	0	0	0	0	0	0	0	0	0	0	0	0	0	0	0	0	0	0	0	0	0
COTU-CM-0692	0	1	0	4	0	0	2	1	0	0	0	0	0	0	0	0	1	3	0	0	0	0	1	1	0	0	0	0	0	0	0	0	1	1	3	1	0	3	4	6	1	3	3	1	2	2	0	0	1
COTU-CM-0693	2	0	1	0	2	1	0	3	0	0	2	5	4	6	0	2	0	1	0	1	0	1	2	0	1	0	0	0	1	1	0	0	5	1	2	4	1	4	3	4	1	4	0	1	1	1	0	2	2
COTU-CM-0694	0	0	0	0	0	0	0	0	0	0	0	0	0	0	0	0	0	0	0	0	0	0	0	0	0	0	0	0	0	0	0	0	0	2	1	1	0	0	12	4	3	6	0	0	0	0	0	2	1
COTU-CM-0695	0	1	4	1	0	0	0	3	0	0	0	0	0	0	0	0	1	0	5	8	0	0	0	0	0	0	0	0	0	0	0	0	0	0	0	0	0	0	0	0	0	0	0	0	0	0	0	0	0
COTU-CM-0696	0	0	0	0	0	0	0	0	0	0	0	0	0	0	0	0	0	0	0	0	0	0	0	0	0	0	0	0	0	0	0	0	5	2	4	5	3	5	6	13	2	6	1	0	0	0	0	0	1
COTU-CM-0697	0	0	0	0	0	0	0	0	0	0	0	0	0	0	0	0	0	0	1	7	1	0	0	0	0	0	0	0	0	0	0	0	2	0	2	0	0	1	1	1	0	2	0	0	0	0	0	0	0
COTU-CM-0698	0	0	0	0	0	0	0	0	0	0	0	0	0	0	0	0	0	0	0	0	0	0	0	0	0	0	0	0	0	0	0	0	0	0	0	0	0	0	8	4	6	2	0	0	0	0	0	1	0
COTU-CM-0699	0	0	0	0	0	0	0	0	0	0	0	0	0	0	0	0	0	0	0	0	0	0	0	0	0	0	0	0	0	0	0	0	2	1	5	1	4	0	3	2	2	2	0	0	0	0	2	0	0
COTU-CM-0700	0	0	0	0	0	0	0	0	0	0	0	0	0	0	0	0	0	0	0	0	0	0	0	0	0	0	0	0	0	0	0	0	7	2	2	0	0	1	6	1	3	0	0	1	0	1	1	0	1
COTU-CM-0701	0	0	0	0	0	0	0	0	0	0	0	0	0	0	0	0	0	0	0	0	0	0	0	0	0	0	0	0	0	0	0	0	6	1	4	1	0	0	12	2	5	4	0	0	0	0	0	4	0
COTU-CM-0702	0	0	0	0	0	0	0	0	0	0	0	0	0	0	0	0	0	0	0	0	0	0	0	0	0	0	0	0	0	0	0	0	0	0	0	0	0	0	1	2	0	10	0	0	0	0	0	0	0
COTU-CM-0703	0	0	0	0	0	0	0	0	0	0	0	0	0	0	0	0	0	0	0	0	0	0	0	0	0	0	0	0	0	0	0	0	0	0	0	0	0	0	0	0	4	8	0	0	0	0	0	0	0
COTU-CM-0705	0	0	0	0	0	0	0	0	0	0	0	0	0	0	0	0	0	0	0	0	0	0	0	0	0	0	0	0	0	0	0	0	1	2	3	6	0	4	30	67	0	0	0	0	0	0	0	0	0
COTU-CM-0706	0	0	0	0	0	0	0	0	0	0	0	0	0	0	0	0	0	0	0	0	0	0	0	0	0	0	0	0	0	0	0	0	2	3	0	2	0	3	32	58	0	2	0	0	0	0	0	0	0
COTU-CM-0707	0	0	0	0	0	0	0	0	0	0	0	0	0	0	0	0	0	0	0	0	0	0	0	0	0	0	0	0	0	0	0	0	8	2	2	3	0	1	37	56	0	5	0	0	0	0	0	0	0
COTU-CM-0709	0	0	0	0	0	0	0	0	0	0	0	0	0	0	0	0	0	0	0	0	0	0	0	0	0	0	0	0	0	0	0	0	0	0	2	0	0	0	8	21	2	35	0	0	0	0	0	0	0
COTU-CM-0710	0	0	0	0	0	0	0	0	0	0	0	0	0	0	0	0	0	0	0	0	0	0	0	0	0	0	0	0	0	0	0	0	2	0	0	0	1	0	4	4	2	29	0	0	0	0	0	0	0
COTU-CM-0711	0	0	0	0	0	0	0	0	0	0	0	0	0	0	0	0	0	0	0	0	0	0	0	0	0	0	0	0	0	0	0	0	0	0	0	1	0	0	3	2	6	15	0	0	0	0	0	0	0
COTU-CM-0712	0	0	0	0	0	0	0	0	0	0	0	0	0	0	0	0	0	0	0	0	0	0	0	0	0	0	0	0	0	0	0	0	0	0	0	0	0	2	3	2	1	17	0	0	0	0	0	0	0
COTU-CM-0713	6	7	24	17	11	3	31	33	26	4	29	28	39	15	8	61	0	7	3	3	3	0	5	7	8	11	1	2	4	2	0	8	8	10	7	4	5	10	0	0	0	6	0	0	0	0	0	0	0
COTU-CM-0715	0	0	0	0	0	0	0	0	0	0	0	0	0	0	0	0	0	0	0	0	0	0	0	0	0	0	0	0	0	0	0	0	4	2	2	2	0	2	29	51	0	1	0	0	0	0	0	0	0
COTU-CM-0716	0	0	0	0	0	0	0	0	0	0	0	0	0	0	0	0	0	0	0	0	0	0	0	0	0	0	0	0	0	0	0	0	3	1	3	3	3	4	22	56	0	3	0	0	0	0	0	0	0
COTU-CM-0725	0	0	0	0	0	0	0	0	0	0	0	0	0	0	0	0	0	0	0	0	0	0	0	0	0	0	0	0	0	0	0	0	0	0	0	0	0	0	7	0	2	6	0	0	0	0	0	0	0
COTU-CM-0726	0	0	0	0	0	0	0	0	0	0	0	0	0	0	0	0	0	0	0	0	0	0	0	0	0	0	0	0	0	0	0	0	107	121	107	45	17	48	58	13	16	37	1	0	1	1	4	1	0
COTU-CM-0727	0	0	0	0	0	0	0	0	0	0	0	0	0	0	0	0	0	0	0	0	0	0	0	0	0	0	0	0	0	0	0	0	0	0	0	0	0	0	7	17	4	20	0	0	0	0	0	0	0
COTU-CM-0728	0	0	0	0	0	0	0	0	0	0	0	0	0	0	0	0	0	0	0	0	0	0	0	0	0	0	0	0	0	0	0	0	0	0	0	1	0	1	13	19	0	0	0	0	0	0	0	0	0
COTU-CM-0731	0	0	0	0	0	0	117	144	0	0	0	0	0	0	0	0	0	0	0	0	0	0	44	57	0	0	0	0	0	0	0	0	0	0	0	0	0	0	0	0	0	0	0	0	0	0	0	0	0
COTU-CM-0732	0	0	0	0	0	0	0	0	0	0	0	0	0	0	0	0	0	0	0	0	0	0	0	0	0	0	0	0	0	0	0	0	6	4	1	2	1	1	12	24	4	10	0	1	0	0	0	0	0
COTU-CM-0733	0	0	0	0	0	0	0	0	0	0	2	2	0	0	0	0	0	0	0	0	0	0	0	0	0	0	1	0	0	0	0	0	2	2	5	5	0	2	5	15	3	7	0	0	0	4	0	0	0
COTU-CM-0734	0	0	0	0	0	0	0	0	0	0	4	11	0	0	0	0	0	0	0	0	0	0	0	0	0	0	1	0	0	0	0	0	0	4	1	2	0	1	21	22	7	15	0	0	0	0	0	0	0
COTU-CM-0735	0	0	0	0	0	0	0	1	0	0	0	0	0	0	0	0	0	4	0	0	0	1	0	2	0	0	0	0	0	0	0	0	1	0	3	0	0	0	8	4	0	0	0	0	0	0	0	0	0
COTU-CM-0736	0	0	0	0	0	0	0	0	0	0	0	0	0	0	0	0	0	0	0	0	0	0	0	0	0	0	0	0	0	0	0	0	0	0	0	0	0	0	6	0	1	0	0	0	0	0	0	0	0
COTU-CM-0737	0	0	0	0	0	0	0	0	0	0	0	0	0	0	0	0	0	0	0	0	0	0	0	0	0	0	0	0	0	0	0	0	0	0	0	0	0	0	2	3	8	42	0	0	0	0	0	0	0
COTU-CM-0738	0	0	0	0	0	0	0	0	0	0	0	0	0	0	0	0	0	0	0	1	0	0	0	0	0	0	0	0	0	0	0	0	11	2	5	3	0	3	3	4	0	4	0	0	1	0	0	0	0
COTU-CM-0739	2	2	0	0	0	0	2	1	0	0	0	0	0	0	0	0	0	3	0	0	1	0	2	8	0	0	0	0	0	0	0	0	1	0	1	3	0	1	16	22	0	0	0	0	0	0	0	0	0
COTU-CM-0740	0	1	0	0	1	1	0	0	2	0	0	0	3	0	1	0	0	0	0	0	0	0	0	0	0	0	0	0	0	0	0	0	1	2	1	0	1	0	4	2	4	11	0	0	0	0	0	0	0
COTU-CM-0741	0	0	0	0	0	0	0	0	0	0	0	0	0	0	0	0	0	0	0	0	0	0	0	0	0	0	0	0	0	0	0	0	7	7	6	6	2	3	68	34	14	33	1	0	0	0	0	1	2
COTU-CM-0742	0	0	0	0	0	0	0	0	0	0	0	0	0	0	0	0	0	0	0	0	0	0	0	0	0	0	0	0	0	0	0	0	7	16	9	6	2	6	0	0	0	0	0	0	0	0	0	0	0
COTU-CM-0746	0	0	0	0	0	0	0	0	0	0	0	0	0	0	0	0	0	0	0	0	0	0	0	0	0	0	0	0	0	0	0	0	0	0	1	0	0	0	102	130	6	12	0	0	0	0	1	0	1
COTU-CM-0747	0	0	0	0	0	0	0	0	0	0	0	0	0	0	0	0	0	0	0	0	0	0	0	0	0	0	0	0	0	0	0	0	6	0	0	0	1	7	2	1	2	3	0	1	0	0	0	0	1
COTU-CM-0748	0	0	0	0	0	0	0	0	0	0	0	0	0	0	0	0	0	0	0	0	0	0	0	0	0	0	0	0	0	0	0	0	29	36	19	17	9	40	1	4	11	21	1	0	1	0	1	0	0
COTU-CM-0749	0	0	0	0	0	0	0	0	0	0	0	0	0	0	0	0	0	0	0	0	0	0	0	0	0	0	0	0	0	0	0	0	5	1	0	6	1	2	0	1	15	12	0	0	0	1	0	0	0
COTU-CM-0750	0	0	3	0	1	1	2	3	0	0	7	4	2	1	0	1	0	0	0	0	0	0	0	1	0	0	1	1	0	0	0	0	1	0	3	1	0	3	0	1	1	0	0	0	0	0	0	0	0
COTU-CM-0751	2	1	1	0	0	0	0	3	3	2	9	1	0	0	0	3	0	1	0	0	0	0	0	0	0	1	0	0	0	2	0	0	0	0	0	0	0	0	0	0	0	0	0	0	0	0	0	0	0
COTU-CM-0752	3	3	9	13	22	10	4	5	4	3	4	1	23	36	0	0	0	4	0	2	5	1	0	5	1	1	0	0	5	6	1	0	4	1	0	1	0	1	16	7	3	3	0	0	0	0	0	0	0
COTU-CM-0753	3	2	3	1	2	0	1	0	2	0	1	1	9	3	0	1	1	1	0	0	0	0	1	2	1	0	1	0	0	0	1	0	3	5	6	3	5	5	4	4	3	10	0	0	1	0	0	0	0
COTU-CM-0754	2	0	2	4	1	1	1	2	1	0	7	6	3	0	1	1	0	1	0	1	2	0	1	0	0	1	0	0	1	3	1	0	2	6	3	4	2	5	2	0	2	2	0	0	0	0	0	0	0
COTU-CM-0755	0	0	0	1	0	0	0	0	0	6	0	0	0	0	0	0	0	0	0	0	0	0	0	0	0	0	0	0	0	0	0	0	0	0	0	0	0	0	0	0	0	0	0	0	0	0	0	0	0
COTU-CM-0757	0	0	0	0	0	0	0	0	0	0	0	0	0	0	0	0	0	0	0	0	0	0	0	0	0	0	0	0	0	0	0	7	0	0	0	0	0	0	0	0	0	0	0	0	0	0	0	0	0
COTU-CM-0758	0	0	1	0	0	0	1	2	0	0	4	0	0	1	0	0	0	0	0	1	0	0	0	0	0	0	0	0	1	0	0	0	0	6	4	3	0	1	6	3	4	9	0	0	0	0	0	0	0
COTU-CM-0759	0	0	0	0	0	0	0	0	0	0	0	0	0	0	6	0	0	0	0	0	0	0	0	0	0	0	0	0	0	0	0	0	0	0	0	0	0	0	0	0	0	0	0	0	0	0	0	0	0
COTU-CM-0761	0	0	0	0	0	0	0	0	0	0	0	0	0	0	0	0	0	0	0	0	0	0	0	0	0	0	0	0	0	0	0	0	6	8	9	6	7	6	17	16	2	3	0	0	0	0	0	0	0
COTU-CM-0762	0	0	0	0	0	0	0	0	0	0	0	0	0	0	0	0	0	0	0	0	0	0	0	0	0	0	0	0	0	0	0	0	3	0	2	0	0	2	0	0	22	13	0	0	0	0	0	0	0
COTU-CM-0763	1	2	0	0	0	0	2	2	0	0	3	8	0	0	0	0	0	2	0	0	0	0	0	0	0	0	0	0	0	0	0	0	0	0	0	0	0	0	0	0	0	0	0	0	0	0	0	0	0
COTU-CM-0764	2	0	1	2	5	2	0	0	1	1	5	41	2	0	3	3	0	0	0	2	1	0	0	0	0	1	0	0	0	0	0	0	1	1	1	1	0	2	2	1	0	0	0	0	0	0	0	0	0
COTU-CM-0765	5	20	4	12	2	4	6	15	0	0	31	9	22	6	7	6	0	1	2	12	2	0	3	5	0	0	2	0	1	3	0	0	0	0	2	1	0	0	0	2	0	6	0	0	0	0	0	0	0
COTU-CM-0766	2	3	0	3	0	0	1	4	0	0	1	3	1	3	2	4	0	0	0	8	0	0	0	0	0	0	2	0	0	0	0	1	0	1	0	0	0	0	0	4	1	2	0	0	0	0	0	0	0
COTU-CM-0767	4	3	29	22	12	5	2	4	11	13	2	0	15	7	9	8	0	3	2	0	2	1	0	1	2	3	0	0	1	2	0	2	1	3	3	4	1	1	6	4	1	7	0	0	0	0	0	1	0
COTU-CM-0768	0	0	0	0	0	0	0	0	0	0	0	0	0	0	0	0	0	0	0	0	0	0	0	0	0	0	0	0	0	0	0	0	20	9	10	6	4	19	0	4	0	0	0	0	0	0	0	0	0
COTU-CM-0769	0	0	0	0	0	0	0	0	0	0	0	0	0	0	0	0	0	0	0	0	0	0	0	0	0	0	0	0	0	0	0	0	64	34	28	35	4	27	229	136	71	58	0	0	0	4	1	2	1
COTU-CM-0770	0	0	0	0	0	0	0	0	0	0	0	0	0	0	0	0	0	0	0	0	0	0	0	0	0	0	0	0	0	0	0	0	19	13	18	15	3	11	247	153	0	1	0	0	1	2	0	0	0
COTU-CM-0773	0	0	0	0	0	0	0	0	0	0	0	0	0	0	6	0	0	0	0	0	0	0	0	0	0	0	0	0	0	0	0	0	0	0	0	0	0	0	0	0	0	0	0	0	0	0	0	0	0
COTU-CM-0774	0	0	1	0	1	1	0	0	0	0	0	0	3	0	7	1	0	0	0	0	2	0	0	0	0	0	0	33	1	0	1	0	0	0	0	0	0	0	0	0	1	0	0	0	0	0	0	0	0
COTU-CM-0775	0	0	0	0	0	0	0	0	0	0	0	0	0	0	0	0	0	0	0	0	0	0	0	0	0	0	0	0	0	0	0	0	2	2	1	0	0	1	0	0	0	3	1	0	0	0	1	0	0
COTU-CM-0776	0	0	0	0	0	0	0	0	0	0	0	0	0	0	0	0	0	0	0	0	0	0	0	0	0	0	0	0	0	0	0	0	1	3	3	4	2	2	4	0	5	3	1	0	0	0	0	0	0
COTU-CM-0777	0	0	0	0	0	0	0	0	0	0	0	0	0	0	0	0	0	0	0	0	0	0	0	0	0	0	0	0	0	0	0	0	4	6	3	4	1	2	1	0	6	3	0	0	1	0	0	0	3
COTU-CM-0778	0	0	0	0	0	0	0	0	0	0	0	0	0	0	0	0	0	0	0	0	0	0	0	0	0	0	0	0	0	0	0	0	2	1	2	0	1	1	2	0	0	5	0	0	0	0	0	0	0
COTU-CM-0779	0	0	0	0	0	0	0	0	0	0	0	0	0	0	0	0	0	0	0	0	0	0	0	0	0	0	0	0	0	0	0	0	0	0	0	0	0	0	10	3	1	6	0	0	0	0	0	0	1
COTU-CM-0780	0	0	0	0	0	0	0	0	0	0	0	0	0	0	0	0	0	0	0	0	0	0	0	0	0	0	0	0	0	0	0	0	0	0	0	0	0	0	14	2	1	0	0	0	0	0	0	0	8
COTU-CM-0781	0	0	0	0	0	0	0	0	0	0	0	0	0	0	0	0	0	0	0	0	0	0	0	0	0	0	0	0	0	0	0	0	0	0	0	0	0	0	3	1	5	2	1	0	0	1	0	0	1
COTU-CM-0782	0	0	0	0	0	0	0	0	0	0	0	0	0	0	0	0	0	0	0	0	0	0	0	0	0	0	0	0	0	0	0	0	0	1	0	2	0	2	7	0	0	0	0	0	1	0	0	0	5
COTU-CM-0783	0	0	0	0	0	0	0	0	0	0	0	0	0	0	0	0	0	0	0	0	0	0	0	0	0	0	0	0	0	0	0	0	10	9	11	8	1	3	10	6	1	1	0	0	0	0	0	0	0
COTU-CM-0784	0	0	0	0	0	0	0	0	0	0	0	0	0	0	0	0	0	0	0	0	0	0	0	0	0	0	0	0	0	0	0	0	2	3	3	1	0	1	0	0	1	8	0	0	0	0	0	0	0
COTU-CM-0785	0	0	0	0	0	0	0	0	0	0	0	0	0	0	0	0	0	0	0	0	0	0	0	0	0	0	0	0	0	0	0	0	4	7	7	6	3	5	4	2	1	3	0	0	0	0	0	0	0
COTU-CM-0786	0	0	0	0	0	0	0	0	0	0	0	0	0	0	0	0	0	0	0	0	0	0	0	0	0	0	0	6	0	0	0	0	0	0	0	0	0	0	0	0	0	0	0	0	0	0	0	0	0
COTU-CM-0787	15	42	32	20	23	19	16	26	36	11	44	89	41	37	14	20	9	33	19	55	30	14	38	17	25	31	23	14	9	17	8	21	0	0	0	0	0	0	0	0	0	0	0	0	0	0	0	0	0
COTU-CM-0788	0	0	0	0	0	0	0	0	0	0	0	0	0	0	0	0	0	0	0	0	0	0	0	0	8	0	0	0	0	0	0	0	0	0	0	0	0	0	0	0	0	0	0	0	0	0	0	0	0
COTU-CM-0789	0	0	0	0	0	0	0	0	0	0	0	0	0	0	0	0	0	0	0	0	0	0	0	0	0	0	0	0	0	0	0	0	0	0	0	0	0	0	0	0	0	0	0	0	0	9	17	0	0
COTU-CM-0790	0	0	0	0	0	0	0	0	0	0	0	0	0	0	0	0	0	0	0	0	0	0	0	0	0	0	0	0	0	0	0	0	0	0	0	0	0	0	0	0	0	0	0	0	0	0	8	0	0
COTU-CM-0791	0	0	0	0	1	0	0	8	0	0	0	0	0	0	0	0	0	0	0	0	0	0	0	0	0	1	0	0	1	0	0	0	0	0	0	0	0	0	0	0	0	0	0	0	0	0	0	0	0
COTU-CM-0792	0	0	0	0	0	0	0	0	0	0	0	0	0	0	0	0	0	0	0	0	0	0	0	0	0	0	0	0	0	0	0	0	0	2	0	0	0	0	0	0	0	0	0	0	0	0	0	0	0
COTU-CM-0793	0	0	0	0	0	0	0	0	0	0	0	0	0	0	0	0	0	0	0	0	1	0	0	0	0	14	0	0	0	0	0	0	0	0	0	0	0	0	0	0	0	0	0	0	0	0	0	0	0
COTU-CM-0794	0	0	0	0	0	1	0	0	0	0	0	0	7	1	0	0	0	0	0	0	0	0	0	0	0	0	1	0	0	0	0	0	0	0	0	0	0	0	0	0	0	0	0	0	0	0	0	0	0
COTU-CM-0795	0	0	0	0	0	0	0	0	10	0	0	0	0	0	0	0	0	0	0	0	0	0	0	0	0	0	0	0	0	0	0	0	0	8	7	0	0	0	1	0	1	7	0	0	0	0	0	0	0
COTU-CM-0796	0	0	0	0	0	0	0	0	0	0	0	0	0	0	0	0	0	0	0	0	0	0	0	0	0	0	0	0	0	0	0	0	0	0	0	0	0	0	0	0	0	0	0	0	0	0	0	0	0
COTU-CM-0800	0	0	0	0	0	0	0	0	0	0	1	0	0	0	0	0	0	0	0	1	0	0	0	69	0	0	0	0	0	0	0	0	0	0	0	0	0	0	0	0	0	0	0	0	0	0	0	0	0
COTU-CM-0801	0	0	0	0	0	0	0	0	0	0	0	0	0	0	0	0	0	0	0	0	0	0	0	0	0	0	0	0	0	0	0	0	7	4	9	1	1	3	0	0	0	0	0	0	0	0	0	0	0
COTU-CM-0802	0	0	0	0	0	0	0	0	0	0	0	0	0	0	0	0	0	0	0	0	0	0	0	0	0	0	0	0	0	0	0	0	4	4	1	0	0	1	3	0	14	12	0	0	0	0	0	0	0
COTU-CM-0803	0	0	0	0	0	0	0	0	0	0	0	0	0	0	0	0	0	0	0	0	0	0	0	0	0	0	0	0	0	0	0	0	0	1	3	2	1	2	6	2	2	0	0	0	0	0	0	0	0
COTU-CM-0804	0	0	0	1	0	0	0	0	0	0	0	0	0	0	0	0	0	0	1	2	0	0	0	0	0	0	0	0	0	0	0	0	24	22	22	19	3	24	31	22	14	41	1	0	3	3	3	0	1
COTU-CM-0805	0	1	1	1	0	0	0	1	0	0	1	1	1	1	0	0	0	0	0	0	0	0	0	0	0	1	0	0	0	0	0	0	10	14	21	16	6	17	19	38	24	31	0	1	0	0	0	0	0
COTU-CM-0806	0	0	0	0	0	0	0	0	0	0	0	0	0	0	0	0	0	0	0	0	0	0	10	0	0	0	0	0	0	0	0	0	0	0	0	0	0	0	0	0	0	0	0	0	0	0	0	0	0
COTU-CM-0807	0	0	30	12	7	2	1	0	4	1	10	0	4	5	4	7	0	1	1	6	2	1	0	2	0	0	3	0	0	1	2	3	11	7	11	9	4	4	19	12	11	11	0	0	0	0	0	0	0
COTU-CM-0808	69	98	22	25	68	32	113	220	43	42	260	191	124	117	67	75	8	56	6	9	21	29	28	56	20	35	53	20	17	38	33	48	84	86	100	77	42	86	82	73	127	247	0	2	7	2	12	6	1
COTU-CM-0809	0	0	0	0	0	0	1	1	0	0	0	0	0	1	0	3	0	0	0	0	0	0	0	0	0	0	0	0	0	0	0	0	14	10	15	6	4	10	5	0	6	15	0	0	0	0	0	0	0
COTU-CM-0810	0	0	0	0	0	0	0	0	0	0	0	0	0	0	0	0	0	0	0	0	0	0	0	0	0	0	0	0	0	0	0	0	0	0	0	0	0	0	0	0	0	0	0	0	0	0	0	0	0
COTU-CM-0811	3	2	0	1	0	0	0	0	8	7	4	4	0	0	6	2	0	4	0	0	0	1	0	0	1	1	1	0	0	1	0	0	3	3	2	4	0	1	2	1	12	11	0	0	1	0	0	1	0
COTU-CM-0812	0	0	0	0	0	0	0	0	0	0	0	0	0	0	0	0	0	0	0	0	0	0	0	0	0	0	0	0	0	0	0	0	6	5	4	2	0	8	20	16	1	9	0	0	0	0	0	0	0
COTU-CM-0813	8	6	0	4	2	1	6	5	1	0	10	9	4	1	3	2	0	2	0	1	0	0	1	2	1	1	1	0	2	1	1	2	12	10	7	4	3	7	21	9	14	19	0	0	0	1	0	0	0
COTU-CM-0814	1	3	0	0	1	2	0	1	4	6	0	0	0	0	1	1	0	5	0	0	0	0	0	0	0	1	0	0	0	0	0	0	4	11	4	16	2	7	14	10	4	13	0	0	0	0	0	0	2
COTU-CM-0815	0	0	0	0	0	0	0	0	0	0	0	0	0	0	0	0	0	0	0	0	0	0	0	0	0	0	0	0	0	0	0	0	0	0	0	0	0	0	1	2	5	11	0	0	0	0	0	0	0
COTU-CM-0816	33	90	77	98	9	3	32	84	1	0	51	25	53	47	21	32	7	27	10	48	1	4	12	21	0	0	5	2	13	16	3	6	7	8	11	14	3	10	40	24	24	35	0	0	0	0	0	0	0
COTU-CM-0817	0	0	0	1	0	0	1	0	2	0	0	0	1	0	0	0	0	0	0	1	0	0	0	0	0	0	1	0	0	0	0	0	6	13	18	21	9	12	53	53	1	10	0	0	0	0	1	0	3
COTU-CM-0818	0	0	0	0	0	0	0	0	0	0	0	1	0	0	0	0	0	1	0	0	0	0	0	0	0	0	0	0	0	0	0	0	20	11	13	12	2	17	46	20	21	47	2	11	3	2	0	2	17
COTU-CM-0819	0	0	0	0	0	0	0	0	0	0	0	0	0	0	0	0	0	0	0	0	0	0	0	0	0	0	0	0	0	0	0	0	25	21	13	21	8	21	39	49	20	54	1	0	1	3	0	0	4
COTU-CM-0820	0	0	0	0	0	0	0	0	0	0	0	0	0	0	0	0	0	0	0	0	0	0	0	0	0	0	0	0	0	0	0	0	0	0	2	2	0	1	3	3	2	8	0	0	0	0	0	0	0
COTU-CM-0821	0	0	0	0	0	0	0	0	0	0	0	0	0	0	0	0	0	0	0	0	0	0	0	0	0	0	0	0	0	0	0	0	4	4	5	2	2	4	17	18	2	5	0	0	0	0	0	0	2
COTU-CM-0822	6	7	0	0	0	0	0	0	0	0	0	0	0	0	0	0	0	3	0	0	0	0	0	0	0	0	0	0	0	0	0	0	5	8	5	3	2	6	43	49	3	5	0	0	0	2	0	0	0
COTU-CM-0823	67	106	133	92	123	47	50	72	66	33	134	27	96	63	113	65	9	35	40	105	56	87	11	42	28	14	37	1	42	47	56	68	50	35	29	37	9	38	68	51	16	41	2	3	6	2	2	2	4
COTU-CM-0824	0	15	0	0	0	0	0	0	0	0	0	0	0	0	0	0	0	0	0	0	0	0	0	0	0	0	0	0	0	0	0	0	0	0	0	0	0	0	0	0	0	0	0	0	0	0	0	0	0
COTU-CM-0825	0	0	0	0	0	0	0	0	0	0	0	0	0	0	0	0	0	0	0	0	0	0	0	0	0	0	0	0	0	0	0	0	9	2	7	13	1	14	9	14	4	24	0	0	0	0	0	0	1
COTU-CM-0826	5	4	7	3	3	1	2	7	3	0	6	1	4	5	4	2	1	2	1	3	3	2	1	2	0	1	0	0	3	1	1	0	3	2	4	3	2	4	12	3	4	4	0	1	0	0	0	0	1
COTU-CM-0827	9	5	6	2	2	3	1	6	1	1	7	0	0	5	6	2	0	1	1	0	1	1	1	0	0	1	0	0	0	2	2	0	41	34	34	24	16	26	26	19	21	40	1	1	6	3	0	1	3
COTU-CM-0828	0	0	0	0	0	0	0	0	0	0	0	0	0	0	0	0	0	0	0	0	0	0	0	0	0	0	0	0	0	0	0	0	32	31	32	40	13	36	39	31	7	16	0	0	0	1	0	1	1
COTU-CM-0829	0	8	0	0	0	0	0	0	0	0	0	0	0	0	0	0	0	0	0	0	0	0	0	0	0	0	0	0	0	0	0	0	0	0	0	0	0	0	0	0	0	0	0	0	0	0	0	0	0
COTU-CM-0830	36	39	17	14	0	0	1	1	0	0	5	1	26	29	0	0	12	24	9	12	0	0	1	0	0	0	2	0	6	15	0	0	0	0	0	0	0	0	0	0	0	0	0	0	0	0	0	0	0
COTU-CM-0831	4	6	3	2	3	0	1	4	1	1	1	0	1	2	5	1	2	9	2	6	3	32	2	3	0	0	8	0	3	6	2	7	51	37	39	46	19	48	69	46	21	55	1	2	1	2	0	1	9
COTU-CM-0832	0	0	0	0	1	0	3	18	0	0	0	0	0	0	0	1	0	0	0	0	0	0	3	3	0	0	0	0	0	0	0	0	4	6	3	4	3	5	39	15	3	10	0	0	0	0	0	1	1
COTU-CM-0833	0	1	1	0	0	0	1	1	0	0	0	0	0	0	0	0	0	0	0	0	0	0	0	0	0	0	0	0	0	0	0	0	14	5	12	8	3	11	20	16	19	45	0	1	0	0	0	1	0
COTU-CM-0834	2	5	1	15	1	0	5	4	0	0	18	0	5	2	0	1	1	0	0	0	2	0	3	5	0	0	11	0	1	0	0	0	0	0	0	0	0	0	0	0	0	0	0	0	0	0	0	0	0
COTU-CM-0835	0	15	0	0	0	0	0	0	0	0	0	0	0	0	0	0	0	0	0	1	0	0	0	0	0	0	0	0	0	0	0	0	0	0	0	0	0	0	0	0	0	0	0	0	0	0	0	0	0
COTU-CM-0836	33	45	24	23	2	0	3	5	0	2	6	1	17	13	0	0	11	35	3	11	0	1	0	1	0	0	2	0	3	10	0	1	49	51	44	20	9	25	47	28	67	121	4	4	4	3	9	2	3
COTU-CM-0837	51	73	0	0	0	0	0	0	0	0	0	0	0	0	0	0	15	77	0	0	0	0	0	0	0	0	0	0	0	0	0	0	14	8	11	14	6	16	12	10	2	8	0	0	1	0	1	2	2
COTU-CM-0838	0	6	0	0	0	0	0	0	0	0	0	0	0	0	0	0	0	0	0	0	0	0	0	0	0	0	0	0	0	0	0	0	0	0	0	0	0	0	0	0	0	0	0	0	0	0	0	0	0
COTU-CM-0839	0	5	5	6	0	0	0	6	5	7	0	0	0	0	5	6	0	2	0	1	0	2	0	1	1	4	0	0	0	0	6	1	3	11	2	10	3	10	10	6	2	12	0	0	0	1	1	0	0
COTU-CM-0840	0	0	0	0	0	0	0	0	0	0	0	0	0	0	0	0	0	0	0	0	0	0	0	0	0	0	0	0	0	0	0	0	9	3	4	7	2	6	2	0	10	9	0	0	0	0	0	0	0
COTU-CM-0841	0	0	0	0	0	0	4	4	0	0	0	0	0	0	0	0	0	0	0	0	0	0	1	1	0	0	0	0	0	0	0	0	3	3	5	6	2	8	1	6	4	6	0	0	0	0	0	0	0
COTU-CM-0842	0	0	0	0	0	0	0	0	0	0	0	0	0	0	0	0	0	0	0	0	0	0	0	0	0	0	0	0	0	0	0	0	11	10	10	9	2	5	2	8	7	30	0	0	0	0	0	1	1
COTU-CM-0843	0	0	0	0	0	0	0	0	0	0	0	0	0	0	0	0	0	0	0	0	0	0	0	0	0	0	0	0	0	0	0	0	22	31	26	22	16	21	104	91	8	12	2	0	0	0	1	0	0
COTU-CM-0844	0	0	0	0	0	0	0	0	0	0	0	0	0	0	0	0	0	0	0	0	0	0	0	0	0	0	0	0	0	0	0	0	1	1	4	2	1	3	16	12	11	18	1	0	0	0	0	0	0
COTU-CM-0845	7	5	5	5	9	2	1	1	0	0	15	0	2	3	0	2	1	1	1	3	1	1	0	0	1	0	1	0	1	1	0	2	0	2	4	0	1	0	10	2	3	4	0	0	0	0	0	0	0
COTU-CM-0846	0	0	0	0	0	0	0	0	0	0	0	0	0	0	0	0	0	0	0	0	0	0	0	0	0	0	0	0	0	0	0	0	32	20	32	17	11	17	70	38	16	18	0	2	3	2	0	0	2
COTU-CM-0847	0	0	0	0	0	0	0	0	0	0	0	0	0	0	0	0	0	0	0	0	0	0	0	0	0	0	0	0	0	0	0	0	5	7	6	7	2	6	11	5	9	40	0	0	0	0	0	0	0
COTU-CM-0848	0	1	1	0	0	0	0	0	0	0	0	1	0	1	0	0	0	0	0	0	0	1	0	0	0	1	0	0	0	2	0	0	50	45	23	43	9	67	82	55	43	42	0	0	0	0	0	0	0
COTU-CM-0849	0	0	0	0	0	0	0	0	0	0	0	0	0	0	0	0	0	0	0	0	0	0	0	0	0	0	0	0	0	0	0	0	1	0	1	7	2	7	2	5	2	0	0	0	0	0	0	0	2
COTU-CM-0850	10	4	3	1	1	2	1	5	1	0	2	0	0	0	2	2	0	0	0	4	8	0	1	4	1	0	0	0	2	0	1	0	1	1	0	1	1	1	2	1	1	3	0	0	0	0	0	0	0
COTU-CM-0851	0	0	0	0	0	0	0	0	0	0	0	0	0	0	0	0	0	0	0	0	0	0	0	0	0	0	0	0	0	0	0	0	6	4	6	1	1	0	12	6	2	2	0	0	0	0	0	0	0
COTU-CM-0852	0	0	0	0	0	0	0	0	0	0	0	0	0	0	0	0	0	0	0	0	0	0	0	0	0	0	0	0	0	0	0	0	4	2	2	0	0	7	4	1	1	3	2	1	1	1	0	1	2
COTU-CM-0853	0	0	0	0	0	0	0	0	0	0	0	0	0	0	0	0	0	0	0	0	0	0	0	0	0	0	0	0	0	0	0	0	15	6	10	10	2	7	2	10	3	10	3	3	6	0	2	3	6
COTU-CM-0857	0	0	0	0	0	0	0	0	0	0	0	0	0	0	0	0	0	0	0	0	0	0	0	0	0	0	0	0	0	0	0	0	5	2	2	4	2	8	0	0	1	1	0	0	0	0	0	0	0
COTU-CM-0860	0	0	0	0	0	0	0	0	0	0	0	0	0	0	0	0	0	0	0	0	0	0	0	0	0	0	0	0	0	0	0	0	3	2	5	4	0	4	6	0	2	4	1	4	2	1	1	1	2
COTU-CM-0861	0	8	0	0	0	0	0	5	0	0	0	0	0	0	0	0	1	3	0	6	1	4	3	2	0	1	5	1	1	3	3	5	80	88	70	101	26	94	231	114	75	180	1	1	1	3	4	2	1
COTU-CM-0862	2	1	3	2	0	0	2	3	0	0	0	0	0	0	0	0	2	2	0	7	1	0	3	2	0	0	0	0	0	0	0	0	21	20	22	26	12	26	5	20	8	55	1	1	0	1	3	3	0
COTU-CM-0863	5	9	24	5	3	1	2	4	0	0	0	1	1	4	0	0	3	4	2	6	1	3	2	4	0	0	1	1	0	0	0	0	0	0	0	2	0	0	1	0	1	3	0	0	0	0	0	0	1
COTU-CM-0864	3	2	5	1	0	1	3	0	0	0	0	0	0	0	0	0	2	2	0	5	0	0	1	6	0	0	0	0	0	0	0	0	0	0	0	0	0	0	0	0	0	0	0	0	0	0	0	0	0
COTU-CM-0865	0	0	1	2	4	0	1	0	4	5	2	2	4	2	0	6	0	1	0	1	1	0	1	0	5	3	2	1	0	1	0	4	3	5	3	10	1	6	0	5	0	4	0	1	0	1	0	1	0
COTU-CM-0866	0	1	2	0	4	4	2	3	3	4	7	1	3	1	5	2	0	0	0	2	3	0	1	0	3	2	0	1	0	1	2	0	13	8	11	12	11	27	4	10	0	10	0	1	0	4	2	2	0
COTU-CM-0867	3	3	5	3	13	3	1	2	20	11	5	6	2	7	18	5	1	2	0	5	7	2	0	5	1	6	2	2	3	3	0	3	4	5	6	3	0	4	4	6	1	5	1	0	0	1	6	2	1
COTU-CM-0868	0	0	0	0	0	0	0	0	0	0	0	0	0	0	0	0	0	0	0	0	0	0	0	0	0	0	0	0	0	0	0	0	0	1	0	0	0	0	6	0	2	0	0	0	0	0	0	0	0
COTU-CM-0869	1	0	0	0	0	0	3	0	0	0	0	0	0	0	0	0	0	0	0	0	0	0	0	0	0	0	0	0	0	0	0	1	5	5	9	5	2	3	16	6	2	2	1	0	0	1	0	1	0
COTU-CM-0870	0	0	0	0	0	0	0	0	0	0	0	0	0	0	0	0	0	0	0	0	0	0	0	0	0	0	0	0	0	0	0	0	2	2	3	2	0	3	12	4	5	1	0	0	0	0	0	1	0
COTU-CM-0871	0	0	0	0	0	0	0	0	0	0	0	0	0	0	0	0	0	0	0	0	0	0	0	0	0	0	0	0	0	0	0	0	3	0	1	1	1	0	8	4	2	3	0	0	0	0	0	0	0
COTU-CM-0872	0	1	1	0	0	0	1	2	0	0	9	2	1	0	3	1	0	1	0	0	0	0	1	0	0	0	0	1	0	0	0	0	0	0	0	0	0	0	0	0	0	0	0	0	0	0	0	0	0
COTU-CM-0873	0	0	0	0	0	0	0	0	0	0	0	0	0	0	0	0	0	0	0	0	0	0	0	0	0	0	0	1	0	0	0	0	1	3	3	5	0	1	8	0	2	2	0	0	0	0	0	0	0
COTU-CM-0874	0	0	1	0	0	0	0	0	1	0	3	5	0	0	3	4	0	0	1	1	0	0	0	0	0	0	3	3	0	2	2	3	9	8	9	8	1	4	42	3	7	3	0	0	0	0	0	0	0
COTU-CM-0875	0	0	0	0	0	0	0	0	0	0	0	0	0	0	0	0	0	0	0	0	0	0	0	0	0	0	0	0	0	0	0	0	1	0	2	0	0	2	11	6	0	1	0	0	0	0	0	0	0
COTU-CM-0876	0	0	0	0	0	0	0	0	0	0	0	0	0	0	0	0	0	0	0	0	0	0	0	0	0	0	0	0	0	0	0	0	9	5	11	3	2	8	6	0	5	10	0	0	0	0	0	1	1
COTU-CM-0877	0	0	0	0	0	0	0	0	0	0	0	0	0	0	0	0	0	0	0	0	0	0	0	0	0	0	0	0	0	0	0	0	0	0	0	0	0	0	0	0	0	0	0	0	0	0	0	0	0
COTU-CM-0878	0	0	0	0	0	1	0	0	0	0	0	0	0	0	0	0	0	0	0	5	0	0	0	24	0	0	0	0	0	0	0	0	0	0	0	0	0	0	0	0	0	0	0	0	0	0	0	0	0
COTU-CM-0879	0	0	0	0	0	0	0	0	0	0	0	1	0	0	0	0	0	0	0	0	0	0	0	0	0	0	0	0	0	0	0	0	6	7	6	1	1	6	5	0	8	18	0	0	0	1	0	0	0
COTU-CM-0880	0	6	0	0	0	0	0	0	0	0	3	0	5	0	0	0	0	0	0	0	0	0	0	0	0	0	2	0	0	0	0	0	2	11	11	3	0	2	11	3	2	7	3	0	2	2	0	1	3
COTU-CM-0881	0	0	0	0	0	0	0	0	0	0	0	0	0	0	0	0	0	0	0	0	0	0	0	0	0	0	0	0	0	0	0	0	22	23	13	16	8	10	9	13	3	17	0	0	0	0	0	1	0
COTU-CM-0883	0	0	0	0	0	0	0	0	0	0	10	1	0	2	1	0	0	0	0	0	0	0	0	0	0	0	3	0	0	0	1	0	6	8	4	6	1	6	13	14	2	8	1	1	0	0	0	0	1
COTU-CM-0884	0	0	0	0	0	0	0	0	0	0	0	0	0	0	0	0	0	0	0	0	0	0	0	0	0	0	0	0	0	0	0	0	1	0	1	0	0	0	0	1	13	13	0	0	0	0	0	0	0
COTU-CM-0885	101	110	0	0	48	43	3	13	0	1	0	0	4	6	0	0	7	28	0	0	10	5	0	0	0	0	0	0	1	3	0	0	0	0	0	0	0	0	0	0	0	0	0	0	0	0	0	0	0
COTU-CM-0886	0	0	3	6	0	0	3	4	3	6	0	0	3	0	12	17	0	0	0	0	0	0	0	2	1	2	0	0	0	0	1	1	2	3	1	3	3	6	16	28	5	7	0	0	0	0	0	0	0
COTU-CM-0887	0	0	0	0	0	0	0	0	0	0	0	0	0	0	0	0	0	0	0	0	0	0	0	0	0	0	0	0	0	0	0	0	14	5	9	9	4	15	17	17	5	9	0	0	0	0	0	0	0
COTU-CM-0888	0	0	0	0	0	0	0	0	0	0	0	0	14	0	0	0	0	0	0	0	0	0	0	0	0	0	0	0	0	0	0	0	0	0	0	0	0	0	0	0	0	0	0	0	0	0	0	0	0
COTU-CM-0890	0	0	0	0	0	0	0	0	0	0	0	0	0	0	0	0	0	0	1	0	0	0	0	0	0	0	0	0	0	0	0	0	0	0	1	0	0	0	0	0	0	0	0	0	0	0	0	0	6
COTU-CM-0893	0	1	0	0	0	0	0	0	0	0	0	0	15	0	0	0	0	0	0	0	0	0	0	0	0	0	0	0	0	0	0	0	0	0	0	0	0	0	0	0	0	0	0	0	0	0	0	0	0
COTU-CM-0895	75	117	0	0	98	88	0	1	0	0	7	1	80	120	1	0	14	74	0	0	58	46	0	0	0	0	1	0	33	31	0	0	2	1	3	4	0	1	0	1	4	2	0	0	0	0	0	0	0
COTU-CM-0897	0	0	0	0	0	0	0	0	0	0	0	0	0	0	0	0	0	0	0	0	0	0	0	0	0	0	0	0	0	0	0	0	75	46	48	66	24	67	17	17	100	181	1	1	2	0	2	0	0
COTU-CM-0898	0	0	0	0	0	0	0	0	0	0	0	0	0	0	0	0	0	0	0	1	0	0	0	0	0	0	0	0	0	0	0	0	4	10	7	3	4	10	10	10	8	15	0	0	0	0	0	0	0
COTU-CM-0899	0	0	0	0	1	0	1	0	0	0	0	0	0	1	1	0	0	0	0	0	0	0	0	0	0	0	0	0	0	0	0	0	8	8	8	5	1	11	5	2	2	10	1	1	0	1	0	0	0
COTU-CM-0900	0	0	0	0	0	0	0	0	0	0	0	0	0	0	0	0	0	0	0	0	0	0	0	0	0	0	0	0	0	0	0	0	1	0	1	4	0	0	5	3	3	6	0	0	0	0	0	0	0
COTU-CM-0901	0	0	0	0	0	0	0	0	0	0	0	0	0	0	0	0	0	0	0	0	0	0	0	0	0	0	0	0	0	0	0	0	8	0	2	10	1	4	6	6	5	17	0	0	0	0	2	0	1
COTU-CM-0902	17	17	21	19	16	10	19	29	20	15	31	16	62	21	12	23	3	17	0	27	3	4	8	31	7	12	5	0	46	18	17	13	18	15	10	7	3	8	15	13	14	16	0	1	1	0	1	0	1
COTU-CM-0903	0	0	0	0	0	0	0	0	0	0	0	0	0	0	0	0	0	0	0	0	0	0	0	0	0	0	0	0	0	0	0	0	5	3	6	5	2	5	5	5	7	8	0	0	0	0	0	0	0
COTU-CM-0904	1	0	7	9	8	6	5	7	1	0	21	20	1	1	0	2	0	1	1	8	1	3	2	2	0	0	11	3	0	1	0	1	4	3	7	2	3	4	0	4	7	4	0	0	0	0	0	0	0
COTU-CM-0905	0	0	0	0	0	0	0	0	0	0	0	0	0	0	0	0	0	0	0	0	0	0	0	0	0	0	0	0	0	0	0	0	3	4	1	6	2	6	30	10	7	5	0	0	0	0	0	0	0
COTU-CM-0906	1	8	5	6	6	2	8	8	0	0	5	2	2	3	2	4	3	4	1	3	3	0	1	2	0	0	1	6	2	0	3	7	3	3	2	3	0	1	4	0	4	1	0	0	0	0	0	0	0
COTU-CM-0907	0	0	0	0	0	0	0	0	0	1	0	0	3	0	0	1	0	0	0	0	0	0	0	0	0	0	0	0	0	1	0	0	27	23	22	11	9	22	20	8	27	27	2	0	1	0	1	1	0
COTU-CM-0908	111	103	91	94	91	64	146	263	28	42	142	91	71	48	159	126	29	101	21	100	35	31	38	86	45	38	72	7	44	34	48	74	31	18	28	11	8	24	30	19	17	23	1	0	0	0	1	1	0
COTU-CM-0909	0	0	1	0	0	0	0	0	0	0	0	0	0	0	0	0	0	0	0	0	0	0	0	0	0	0	0	0	0	0	0	0	6	2	2	2	1	3	9	3	10	6	0	0	0	0	0	0	0
COTU-CM-0910	0	0	0	0	0	0	0	0	0	0	0	0	0	0	1	1	0	0	0	0	0	0	0	0	0	0	1	0	0	0	1	0	9	6	11	9	1	6	10	1	4	10	0	0	0	0	1	0	0
COTU-CM-0911	1	0	0	0	0	1	2	13	0	0	7	4	0	0	0	0	0	1	0	0	0	0	6	8	0	0	1	1	0	0	0	0	0	0	0	0	0	0	0	0	0	0	0	0	0	0	0	0	0
COTU-CM-0912	2	0	4	0	0	0	2	1	1	1	0	0	1	0	0	0	0	0	0	1	0	0	1	0	0	0	0	3	0	0	0	0	4	4	2	2	1	3	9	6	5	11	0	0	0	0	0	0	0
COTU-CM-0913	0	0	0	0	0	0	0	0	0	0	0	0	0	0	0	0	0	0	0	0	0	0	0	0	0	0	0	0	0	0	0	0	5	7	2	8	0	5	8	14	2	8	0	0	0	0	0	2	1
COTU-CM-0914	23	14	5	0	2	0	3	1	0	0	0	3	41	39	0	0	0	5	0	0	19	0	1	0	1	0	0	0	13	4	0	0	13	10	12	21	3	13	15	13	10	14	0	0	0	0	0	0	0
COTU-CM-0915	0	0	0	0	0	0	0	0	0	0	0	0	0	0	0	0	0	0	0	0	0	0	0	0	0	0	0	0	0	0	0	0	9	8	8	3	5	4	12	11	3	10	0	0	0	0	1	0	0
COTU-CM-0916	26	32	10	15	4	4	13	23	3	3	7	4	41	20	12	16	0	9	0	5	6	6	7	3	1	0	2	1	2	6	8	8	10	7	8	6	4	7	35	20	7	9	0	0	0	0	0	0	1
COTU-CM-0917	0	0	0	0	0	0	0	0	0	0	0	0	0	0	0	0	0	0	0	0	0	0	0	0	0	0	0	0	0	0	0	0	14	12	16	20	10	26	24	19	1	2	0	0	0	0	0	0	0
COTU-CM-0918	0	0	0	0	0	0	0	0	0	0	0	0	0	0	0	0	0	0	0	0	0	0	0	0	0	0	0	0	0	0	0	0	3	5	4	7	1	4	8	4	0	8	0	0	0	0	0	0	0
COTU-CM-0919	4	0	0	0	2	1	0	2	0	0	0	0	0	0	0	0	0	0	0	0	1	0	0	0	0	0	0	1	0	0	0	0	11	6	14	11	1	4	4	3	13	15	0	1	0	0	0	0	0
COTU-CM-0920	0	5	0	0	0	0	0	0	0	0	0	0	0	0	0	0	0	0	0	0	0	0	0	0	0	0	0	0	0	0	0	0	6	5	7	5	2	1	4	2	2	2	0	0	0	0	0	0	0
COTU-CM-0921	0	0	0	0	0	0	0	0	0	0	0	0	0	0	0	0	0	0	0	0	0	0	0	0	0	0	0	0	0	0	0	0	1	1	2	1	0	0	9	2	1	1	0	0	0	0	0	0	0
COTU-CM-0922	3	18	28	28	41	37	3	10	5	5	23	11	2	6	6	17	2	1	6	6	8	7	3	5	0	0	0	2	1	2	4	4	32	20	26	28	6	27	44	44	24	50	1	1	1	1	2	1	1
COTU-CM-0923	30	38	82	120	0	0	29	34	0	0	46	15	1	0	0	0	10	34	14	74	0	0	14	10	0	0	8	2	0	0	0	0	12	14	13	7	2	9	18	9	13	15	2	1	0	0	0	0	0
COTU-CM-0924	0	1	0	2	0	1	4	2	0	1	0	2	0	1	1	3	0	0	0	0	1	0	1	2	0	1	0	0	0	1	1	0	36	48	38	26	9	50	82	52	19	77	0	0	0	0	1	0	0
COTU-CM-0925	0	0	0	1	1	2	0	0	0	0	0	0	0	0	0	0	0	3	0	0	1	1	1	1	0	0	0	0	0	0	0	0	11	8	15	8	2	10	6	4	13	24	1	0	2	1	0	0	0
COTU-CM-0926	0	0	0	0	0	0	0	0	0	0	0	0	0	0	0	0	0	0	0	0	0	0	0	0	0	0	0	0	0	0	0	0	4	5	6	5	4	8	7	7	4	13	0	0	0	0	0	0	1
COTU-CM-0927	0	0	0	0	0	0	0	1	1	0	2	0	0	1	0	0	0	0	0	0	0	0	0	0	0	0	0	0	0	0	0	0	23	14	22	15	2	16	23	3	25	43	0	0	0	0	0	0	0
COTU-CM-0928	0	0	0	0	0	0	0	0	0	0	0	0	0	0	0	0	0	0	0	0	0	0	0	0	0	0	0	0	0	0	0	0	2	1	3	0	0	0	62	67	8	15	0	0	0	0	0	0	0
COTU-CM-0929	0	1	6	4	0	0	0	0	0	0	4	11	0	1	2	0	0	0	1	1	0	0	0	0	0	0	1	5	0	0	0	1	5	4	7	3	4	9	8	3	4	7	0	0	0	0	0	0	0
COTU-CM-0930	0	0	0	0	0	0	0	0	0	0	0	0	0	0	0	0	0	0	0	0	0	0	0	0	0	0	0	0	0	0	0	0	7	3	3	4	1	9	11	17	29	27	0	0	0	0	0	1	0
COTU-CM-0931	0	0	0	0	0	0	0	0	0	0	0	0	0	0	0	0	0	0	0	0	0	0	0	0	0	0	0	0	0	0	0	0	3	5	4	2	0	3	5	3	4	3	0	0	0	0	0	0	1
COTU-CM-0932	0	0	0	0	0	0	0	0	0	0	0	0	0	0	0	0	0	0	0	0	0	0	0	0	0	0	0	0	0	0	0	0	8	10	12	9	2	12	11	11	9	19	0	0	0	2	0	0	0
COTU-CM-0933	0	0	0	1	0	0	0	0	0	0	3	9	2	4	0	0	0	0	0	0	0	0	0	1	0	0	3	1	0	2	0	0	0	0	0	0	0	0	0	0	0	0	0	0	0	0	0	0	0
COTU-CM-0935	1	1	2	11	1	4	3	4	1	1	18	24	19	33	6	14	1	1	1	26	3	3	2	10	1	1	15	2	14	17	1	9	0	0	0	0	0	0	0	1	0	0	0	0	0	0	0	0	0
COTU-CM-0936	0	0	0	0	0	0	0	0	0	0	0	0	0	0	0	0	0	0	0	0	0	0	0	0	0	0	0	0	0	0	0	0	1	2	7	15	7	20	2	4	3	23	0	0	0	1	4	1	1
COTU-CM-0937	0	0	0	0	152	138	87	76	0	0	0	0	0	0	0	0	0	0	0	0	67	80	31	33	0	0	0	0	0	0	0	0	0	0	0	0	0	0	0	0	0	0	0	0	0	0	0	0	0
COTU-CM-0938	0	0	0	0	0	0	0	0	0	0	0	0	0	0	0	0	0	0	0	0	0	0	0	0	0	0	0	0	0	0	0	0	8	14	12	5	1	4	35	23	4	12	0	0	0	0	0	0	0
COTU-CM-0939	0	0	0	0	0	0	0	0	0	0	0	0	0	0	0	0	0	0	0	0	0	0	0	0	0	0	0	0	0	0	0	0	2	2	0	2	1	0	18	34	4	2	0	0	0	0	0	0	0
COTU-CM-0940	198	125	95	76	18	13	4	9	0	1	82	35	33	15	1	0	21	83	13	32	9	15	4	0	0	0	19	1	7	11	0	0	4	2	5	0	1	1	0	1	8	10	0	0	0	0	0	0	0
COTU-CM-0941	92	47	35	18	5	10	5	3	0	0	20	11	17	7	0	0	4	31	1	9	3	4	1	0	0	0	4	1	6	4	0	0	0	0	3	2	0	1	0	0	3	4	0	0	0	0	0	0	0
COTU-CM-0942	0	0	7	0	0	0	0	0	0	0	0	0	0	0	0	0	0	0	0	0	0	0	0	0	0	0	0	0	0	0	0	0	0	0	0	0	0	0	0	0	0	0	0	0	0	0	0	0	0
COTU-CM-0943	1	0	0	0	0	0	1	1	0	0	0	1	1	1	0	2	0	0	0	0	1	1	0	0	0	0	0	0	0	0	0	0	5	3	1	6	3	16	8	3	2	12	0	0	0	0	0	0	0
COTU-CM-0944	6	4	4	4	3	1	5	7	5	0	11	5	3	0	3	2	1	5	0	2	0	0	1	1	0	0	5	1	1	3	0	2	4	3	4	0	1	2	2	2	7	6	0	0	0	0	0	1	0
COTU-CM-0945	0	0	0	0	0	0	1	0	0	0	0	2	1	0	0	0	0	1	0	0	0	0	0	0	0	0	0	0	0	0	0	0	13	9	9	6	7	14	29	11	2	4	0	0	0	0	1	2	0
COTU-CM-0946	0	0	0	0	0	0	0	0	0	0	0	0	0	0	0	0	0	0	0	0	0	0	0	0	0	0	0	0	0	0	0	0	0	3	1	1	1	0	0	0	2	2	0	1	7	4	0	0	0
COTU-CM-0948	0	0	0	0	0	0	0	0	0	0	0	0	0	0	0	0	0	4	3	0	0	5	2	0	6	0	0	0	4	1	1	2	0	0	0	0	0	1	0	0	0	0	0	0	0	0	0	0	0
COTU-CM-0949	0	0	0	0	0	0	0	0	0	0	0	0	0	0	0	0	0	0	0	0	0	0	0	0	0	0	0	0	0	0	0	0	0	1	0	0	0	0	0	1	0	0	0	0	0	0	0	4	0
COTU-CM-0950	0	0	0	0	0	0	0	0	5	0	0	0	0	0	0	0	0	0	0	0	0	0	0	0	0	0	0	0	0	0	0	0	0	0	0	0	0	0	0	0	0	0	0	0	0	3	5	0	0
COTU-CM-0951	0	0	0	0	0	0	0	0	0	0	0	0	0	0	0	0	0	0	0	0	0	0	9	0	0	0	0	0	0	0	0	0	0	0	0	0	0	0	0	0	0	0	0	0	0	0	0	0	0
COTU-CM-0952	0	0	1	0	0	0	1	1	0	0	0	0	0	0	0	0	0	0	0	0	0	0	0	0	0	0	0	0	0	0	0	0	0	0	0	0	0	0	0	0	0	0	0	0	0	0	0	0	0
COTU-CM-0953	0	0	0	0	0	0	0	0	0	0	0	0	0	0	0	0	0	0	0	0	0	0	0	0	0	0	0	0	0	0	0	0	0	0	0	0	0	0	0	0	0	0	0	0	0	6	0	0	0
COTU-CM-0954	0	0	0	0	0	0	0	0	0	0	0	0	0	0	0	0	0	0	0	0	0	0	0	1	0	0	0	0	0	0	0	0	0	0	0	33	0	0	0	0	0	0	0	0	1	0	0	0	0
COTU-CM-0955	0	0	0	0	5	0	0	0	0	0	0	0	0	0	0	0	0	0	0	0	0	0	0	0	0	0	0	0	0	0	0	0	0	0	0	0	0	0	0	0	0	0	0	0	0	0	0	0	0
COTU-CM-0957	0	0	0	0	0	0	0	0	0	0	0	0	0	0	0	0	0	0	0	0	0	0	0	0	0	0	0	0	0	0	0	0	0	0	0	0	0	0	0	0	0	0	0	8	0	0	0	0	0
COTU-CM-0958	0	0	0	0	0	0	0	0	0	0	0	0	0	0	0	0	0	0	0	0	0	0	0	0	0	0	0	0	0	0	0	0	68	56	58	57	12	69	307	102	79	102	0	0	0	0	1	0	2
COTU-CM-0961	0	0	0	7	0	0	0	0	0	0	6	0	0	0	0	0	3	2	1	1	0	0	2	4	0	0	1	2	0	0	0	0	45	33	31	30	10	30	117	13	20	15	9	1	2	1	0	3	4
COTU-CM-0962	0	4	5	1	0	0	5	3	0	0	4	5	0	1	3	3	1	0	0	3	0	0	0	4	0	0	1	2	0	0	0	0	50	22	20	24	14	29	110	10	20	14	0	8	4	1	0	9	5
COTU-CM-0963	7	7	10	2	13	3	4	5	2	0	3	0	0	1	1	1	2	8	6	9	5	3	1	7	2	0	2	1	0	0	1	0	0	0	0	0	0	0	0	0	0	0	0	0	0	0	0	0	0
COTU-CM-0964	2	2	0	1	0	0	1	1	0	1	1	1	0	6	0	2	0	0	0	0	1	0	1	1	0	0	5	0	3	0	0	0	0	0	0	0	0	0	0	0	0	0	0	0	0	0	0	0	0
COTU-CM-0965	2	2	4	1	3	1	2	1	1	1	4	1	1	8	1	0	1	5	0	2	1	1	1	2	0	1	2	0	1	0	2	0	0	0	0	0	0	0	0	0	0	0	0	0	0	0	0	0	0
COTU-CM-0966	0	0	0	0	0	0	0	0	0	0	0	0	18	0	0	0	0	0	0	0	0	0	0	0	0	0	0	0	0	0	0	0	0	0	0	1	0	0	0	1	0	0	0	0	1	0	0	0	0
COTU-CM-0969	76	101	61	87	51	31	61	58	67	39	74	88	23	37	28	19	45	42	41	146	44	15	38	48	41	31	51	15	13	14	7	8	0	0	0	0	0	0	0	0	0	0	0	0	0	0	0	0	0
COTU-CM-0970	0	0	0	0	0	0	0	0	0	0	0	0	0	0	0	0	0	0	0	0	0	0	0	0	0	0	0	0	0	0	0	0	0	1	1	3	0	1	86	35	0	0	0	0	0	0	0	0	0
COTU-CM-0971	0	0	0	0	0	0	0	0	0	0	0	0	0	5	0	0	0	0	0	0	6	0	0	0	0	0	0	0	0	0	0	0	0	0	0	0	0	0	0	0	0	0	0	0	0	0	0	0	0
COTU-CM-0972	6	3	2	11	3	5	8	5	2	4	26	79	27	34	15	125	0	0	1	33	2	5	3	6	3	13	11	56	31	20	24	74	0	0	0	0	0	0	0	0	0	0	0	0	0	0	0	0	0
COTU-CM-0973	0	0	0	0	0	0	0	0	0	0	0	16	0	0	0	0	0	0	0	0	0	0	0	0	0	0	0	0	0	0	0	0	0	0	0	0	0	0	0	0	0	0	0	0	0	0	0	0	0
COTU-CM-0974	5	6	3	12	6	1	3	7	10	2	24	63	53	22	14	125	1	1	4	52	2	5	4	7	8	29	11	66	22	21	12	103	0	0	0	0	0	0	0	0	0	0	0	0	0	0	0	0	0
COTU-CM-0975	0	0	0	0	0	0	0	0	0	0	0	8	0	0	0	0	0	0	0	0	0	0	0	0	0	0	0	0	0	0	0	0	0	0	0	0	0	0	0	0	0	0	0	0	0	0	0	0	0
COTU-CM-0976	0	0	0	0	0	0	0	0	0	0	0	0	0	0	0	0	0	0	0	0	0	0	0	0	0	0	0	0	0	0	0	0	2	1	2	0	1	3	7	2	2	0	0	0	0	0	0	0	0
COTU-CM-0977	0	0	0	0	0	0	0	0	0	0	0	0	0	0	0	0	0	0	0	0	0	0	0	0	0	0	0	0	0	0	0	0	4	1	2	3	3	3	9	0	5	6	0	0	0	0	0	0	0
COTU-CM-0978	0	0	0	0	0	0	0	0	0	0	0	0	0	1	0	0	0	0	0	0	0	0	0	0	0	0	0	0	0	0	0	0	3	1	3	0	0	1	7	5	3	3	0	0	0	0	0	0	0
COTU-CM-0979	0	0	0	0	0	0	0	0	0	0	0	0	0	0	0	0	0	0	0	0	0	0	0	0	0	0	0	0	0	0	0	0	7	4	3	2	4	6	2	1	0	0	0	0	0	0	1	1	1
COTU-CM-0980	0	0	0	0	0	0	0	0	0	0	0	0	0	0	0	0	0	0	0	0	0	0	0	0	0	0	0	0	0	0	0	0	1	1	2	0	1	5	3	0	1	5	0	0	0	0	0	0	0
COTU-CM-0981	0	0	0	0	0	0	0	0	0	0	0	0	0	0	0	0	0	0	0	0	0	0	0	0	0	0	0	0	0	0	0	0	3	1	8	1	0	0	6	4	2	5	0	0	0	0	0	0	0
COTU-CM-0982	0	0	0	0	0	0	0	0	0	0	0	0	0	0	0	0	0	0	0	0	0	0	0	0	0	0	0	0	0	0	0	0	0	1	0	1	0	0	1	1	4	6	0	0	0	0	0	0	0
COTU-CM-0983	0	0	0	0	0	0	0	0	0	0	0	0	0	0	0	0	0	0	0	0	0	0	0	0	0	0	0	0	0	0	0	0	0	0	2	0	0	0	88	51	14	13	1	0	0	0	0	0	7
COTU-CM-0984	0	0	0	0	0	0	0	0	0	0	0	0	0	0	0	0	0	0	0	0	0	0	0	0	0	0	0	0	0	0	0	0	3	1	2	0	0	1	0	0	7	8	0	0	0	0	0	0	0
COTU-CM-0985	0	0	0	0	0	0	0	0	0	0	0	0	0	0	0	0	0	0	2	57	0	0	0	0	0	0	0	0	0	0	0	0	0	1	0	1	1	0	1	0	20	36	0	0	0	0	0	0	0
COTU-CM-0986	0	1	2	0	8	2	0	0	0	0	0	0	0	0	0	0	19	22	15	177	254	163	0	0	0	0	13	1	12	19	9	0	16	5	11	8	4	10	8	3	2	15	0	0	0	0	1	0	0
COTU-CM-0987	0	0	0	0	0	0	0	0	0	0	0	0	0	0	0	0	0	0	0	0	0	0	0	0	0	0	0	0	0	0	0	0	6	3	1	6	1	2	1	0	15	29	0	0	0	0	0	0	0
COTU-CM-0988	0	0	0	0	0	0	0	0	0	0	0	0	0	0	0	0	0	0	0	0	0	0	0	0	0	0	0	0	0	0	0	0	0	0	0	0	0	0	105	98	1	0	0	0	0	0	0	0	0
COTU-CM-0989	0	0	0	0	0	0	0	0	0	0	0	0	0	0	0	0	0	0	0	0	0	0	0	0	0	0	0	0	0	0	0	0	21	10	20	9	2	11	17	6	235	214	0	0	0	0	0	0	0
COTU-CM-0990	0	0	0	0	0	0	0	0	0	0	0	0	0	0	0	0	0	0	0	0	0	0	0	0	0	0	0	0	0	0	0	0	7	9	2	2	0	0	6	1	8	11	0	0	0	0	0	0	0
COTU-CM-0991	0	0	0	0	0	0	0	0	0	0	0	0	0	0	0	0	0	0	0	0	0	0	0	0	0	0	0	0	0	0	0	0	6	3	7	4	1	3	8	2	5	9	0	0	0	0	0	0	0
COTU-CM-0992	0	0	0	0	0	0	0	0	0	0	0	0	0	0	0	0	4	1	0	12	0	0	5	7	0	0	9	0	2	2	0	0	6	3	5	4	1	1	6	10	6	4	0	0	0	0	0	0	0
COTU-CM-0993	0	0	0	0	0	0	0	0	0	0	0	0	0	0	0	0	0	8	0	0	0	0	0	0	0	0	0	0	0	0	0	0	0	0	0	0	0	0	0	0	0	0	0	0	0	0	0	0	0
COTU-CM-0994	13	12	3	1	10	5	21	8	24	10	4	3	3	1	17	4	3	13	10	3	2	4	6	11	14	21	2	0	5	1	0	35	50	20	38	75	32	91	62	64	17	18	0	1	0	0	0	0	0
COTU-CM-0995	0	0	0	0	0	0	0	0	0	0	0	0	0	0	0	0	0	0	0	0	0	0	0	0	0	0	0	0	0	0	0	0	0	0	2	0	1	1	8	0	0	1	0	0	0	0	0	0	0
COTU-CM-0996	14	21	3	5	8	5	21	21	8	5	4	8	4	13	2	0	0	1	0	0	0	1	3	1	3	2	1	5	0	1	1	2	2	0	1	0	0	0	0	0	1	0	0	0	0	0	0	0	0
COTU-CM-0997	0	0	0	0	0	0	0	0	0	0	0	0	0	0	0	0	0	0	0	0	0	0	0	0	0	0	0	0	0	0	0	0	0	0	0	0	0	0	1	0	0	0	0	0	0	0	0	0	0
COTU-CM-0999	0	0	0	0	0	0	0	0	0	0	0	1	0	0	0	0	0	0	0	0	0	0	0	0	0	0	0	0	0	0	0	0	0	0	0	0	0	0	0	0	0	0	0	0	0	0	0	0	0
COTU-CM-1000	0	0	0	0	0	0	0	0	0	0	0	0	0	0	0	0	0	0	0	0	0	0	0	0	0	0	0	0	0	0	0	0	0	0	0	0	0	0	0	0	0	0	0	0	0	0	9	0	0
COTU-CM-1001	0	0	0	0	0	0	0	0	0	0	0	1	0	0	0	0	0	0	0	0	0	0	0	0	0	0	0	0	0	0	0	0	0	0	0	0	0	0	0	0	0	0	0	0	0	0	0	0	0
COTU-CM-1003	0	0	0	0	0	0	0	0	0	0	0	0	0	0	0	0	0	0	0	0	0	0	0	0	0	0	0	0	1	0	0	0	0	0	0	4	0	0	0	0	0	0	0	0	0	0	0	0	0
COTU-CM-1004	0	0	0	0	0	0	0	0	0	0	0	0	0	0	0	0	0	0	0	0	0	0	0	0	0	0	0	0	0	0	0	0	0	0	0	0	0	0	0	0	0	0	0	0	0	0	0	0	0
COTU-CM-1006	0	0	0	0	0	0	0	0	0	0	0	0	0	0	0	0	0	0	0	0	0	0	0	0	0	0	0	0	0	0	0	0	0	0	0	0	0	0	0	0	0	0	0	0	0	6	0	0	0
COTU-CM-1007	0	0	0	0	0	0	0	0	0	0	0	0	0	0	0	0	0	0	0	0	0	0	0	0	0	0	0	0	0	0	0	0	1	0	0	2	1	0	1	0	0	0	0	0	2	0	7	0	0
COTU-CM-1009	0	0	0	0	0	0	0	0	0	0	0	0	0	0	0	0	0	0	0	0	0	0	0	0	0	0	0	0	0	0	0	0	0	0	0	0	0	0	0	0	0	0	0	0	0	0	7	0	0
COTU-CM-1010	0	0	0	0	0	0	0	0	15	6	4	8	0	0	0	0	0	0	0	0	0	0	0	0	0	2	0	1	0	0	0	0	1	1	0	2	0	2	0	0	2	0	0	0	0	0	0	0	0
COTU-CM-1011	0	0	0	0	0	0	0	0	8	5	1	9	0	0	0	0	0	0	0	0	0	0	0	0	1	0	0	0	0	0	0	0	0	0	0	0	0	0	0	0	0	0	0	0	0	0	0	0	0
COTU-CM-1012	0	0	0	0	0	0	0	1	0	0	1	0	0	0	0	0	0	0	0	0	0	0	1	0	0	0	0	0	0	0	0	0	8	1	5	8	5	11	1	3	3	3	0	0	1	0	0	0	0
COTU-CM-1013	0	0	0	0	0	0	0	0	0	0	0	0	0	0	0	0	0	0	0	6	0	0	0	0	0	0	0	0	0	0	0	0	0	0	0	0	0	0	0	0	0	0	0	0	0	0	0	0	0
COTU-CM-1014	0	0	0	0	0	0	0	0	0	0	0	0	0	0	0	0	0	0	0	0	0	0	0	0	0	0	7	0	0	0	0	0	0	0	0	0	0	0	0	0	0	0	0	0	0	0	0	0	0
COTU-CM-2001	13	23	17	11	9	5	11	33	10	13	23	42	13	17	14	19	4	14	0	10	0	4	5	6	11	14	5	9	3	2	2	5	29	16	16	49	11	48	44	24	20	43	0	0	0	3	4	1	0
COTU-CM-2002	361	518	458	626	434	371	664	714	0	0	0	0	0	0	0	0	78	155	88	359	64	65	163	274	0	0	0	0	0	0	0	0	290	268	332	255	130	333	70	50	77	48	3	0	0	3	2	2	0
COTU-CM-2003	59	95	104	83	113	102	134	145	279	115	166	150	139	234	275	122	19	46	11	90	44	28	77	119	68	171	70	376	89	93	46	201	0	0	0	0	0	0	0	0	0	0	0	0	0	0	0	0	0
COTU-CM-2004	0	0	0	0	0	0	0	0	0	0	0	0	0	0	0	0	0	0	0	0	0	0	0	0	0	1	0	0	0	0	0	0	155	156	162	102	44	155	218	86	141	75	1	3	4	6	3	4	1
COTU-CM-2005	163	113	90	68	145	68	111	109	195	112	161	115	49	77	62	29	41	75	21	25	48	22	68	104	62	30	41	22	41	30	27	23	0	0	0	0	0	0	0	0	0	0	0	0	0	0	0	0	0
COTU-CM-2006	1	2	8	4	6	13	4	5	1	2	5	5	1	6	8	10	0	11	1	5	4	3	0	3	0	0	3	2	40	0	1	6	0	6	2	1	1	1	29	21	0	1	0	0	0	0	0	0	0
COTU-CM-2007	22	12	14	37	32	22	18	44	20	9	47	18	27	38	75	44	4	10	4	7	3	5	3	17	2	3	6	2	5	9	9	20	18	11	7	12	3	18	40	39	53	104	0	0	0	0	0	0	0
COTU-CM-2008	187	202	151	287	252	176	322	323	157	82	175	6	202	465	480	137	142	152	117	349	165	176	416	434	114	148	209	22	152	216	108	292	23	26	29	15	8	17	132	30	34	26	0	0	1	0	0	1	1
COTU-CM-2009	27	33	25	36	118	59	87	84	124	73	136	41	40	76	66	12	18	34	8	54	81	55	52	69	53	35	72	37	29	25	22	22	407	377	474	221	100	303	604	163	276	298	3	6	6	6	14	2	9
COTU-CM-2010	502	710	492	652	550	455	934	823	616	281	927	391	559	646	688	513	124	287	161	889	185	131	422	669	93	128	262	244	248	155	123	467	0	0	0	0	0	0	0	0	0	0	0	0	0	0	0	0	0
COTU-CM-2011	28	52	122	84	101	59	57	79	56	55	191	313	66	82	56	83	7	16	31	90	29	18	15	25	8	9	29	15	19	18	47	14	0	2	1	6	0	4	1	4	0	5	0	0	0	0	0	0	0
COTU-CM-2012	41	68	9	35	31	27	26	34	23	22	24	0	5	12	19	4	22	23	2	48	13	18	17	24	3	21	8	1	4	3	2	9	312	302	335	227	99	266	292	94	166	121	1	2	2	3	2	6	0
COTU-CM-2013	0	0	0	0	0	0	0	0	0	0	0	0	0	0	0	0	0	0	0	0	0	0	0	0	0	0	0	0	0	0	0	0	249	175	203	239	93	228	580	499	61	89	1	2	3	5	4	7	9
COTU-CM-2014	0	0	0	0	0	0	0	0	0	0	0	0	0	0	0	0	0	0	0	0	0	0	0	0	0	0	0	0	0	0	0	0	196	171	168	109	38	112	177	184	108	184	1	1	2	2	0	3	0
COTU-CM-2015	0	0	0	0	0	0	0	0	0	0	0	0	0	0	0	0	0	0	0	0	0	0	0	0	0	0	0	0	0	0	0	0	69	70	55	38	21	48	138	125	124	144	0	0	0	0	0	2	1
COTU-CM-2016	0	0	0	0	0	0	0	0	0	0	0	0	0	0	0	0	0	0	0	0	0	0	0	0	0	0	0	0	0	0	0	0	62	59	46	36	19	38	21	20	44	32	0	0	0	3	0	1	0
COTU-CM-2017	4	5	10	6	8	6	5	6	2	4	10	8	10	7	9	5	0	1	1	0	0	4	0	1	0	1	5	0	11	4	0	0	28	15	13	67	22	84	20	65	29	90	0	0	0	0	4	1	0
COTU-CM-2018	1	6	28	51	0	0	22	10	51	92	48	50	64	62	8	45	0	0	0	21	0	0	0	1	14	27	5	5	23	7	1	12	19	23	17	47	16	48	0	3	1	25	0	0	0	10	9	7	0
COTU-CM-2019	35	66	88	133	33	99	128	158	62	138	193	55	103	152	45	118	9	40	13	73	6	82	63	36	83	111	59	73	32	38	0	31	4	1	2	4	2	8	0	0	1	18	0	0	0	0	1	0	0
COTU-CM-2020	0	0	0	0	0	0	0	0	0	0	0	0	0	0	0	0	0	0	0	0	0	0	0	0	0	0	0	0	0	0	0	0	0	0	4	2	1	5	0	0	8	16	0	0	0	0	0	0	0
COTU-CM-2021	0	0	0	0	0	0	0	0	0	0	0	0	0	0	0	0	0	0	0	0	0	0	0	0	0	0	0	0	0	0	0	0	319	259	282	196	117	386	118	140	99	279	0	0	0	0	0	0	0
COTU-CM-2022	0	0	0	0	0	0	0	0	0	0	0	0	0	0	0	0	0	0	0	0	0	0	0	0	0	0	0	0	0	0	0	0	0	0	0	0	0	0	21	31	13	14	0	0	0	0	0	0	0
COTU-CM-2023	3	3	15	20	0	0	3	4	0	0	0	0	0	2	193	111	4	1	6	56	0	0	8	3	0	0	0	0	0	0	44	215	272	264	290	386	134	410	315	125	44	49	4	2	1	7	3	4	1
COTU-CM-2024	11	9	21	70	7	2	22	13	20	4	18	18	17	4	7	57	0	7	4	49	0	1	9	13	4	3	6	3	4	7	0	53	13	8	5	6	3	7	5	6	573	1087	0	0	0	0	0	0	1
COTU-CM-2025	0	0	0	0	0	0	0	0	0	0	0	0	0	0	0	0	0	0	0	0	0	0	0	0	0	0	0	0	0	0	0	0	23	18	18	3	4	18	174	161	6	10	0	0	0	0	0	0	2
COTU-CM-2026	78	75	196	227	49	36	18	21	269	297	16	23	20	23	135	131	9	44	19	56	5	10	3	5	51	95	5	1	3	3	35	68	49	46	38	45	4	34	18	24	15	15	0	0	0	0	0	0	0
COTU-CM-2027	0	0	0	0	0	0	0	0	0	0	0	0	0	0	0	0	0	0	0	0	0	0	0	0	0	0	0	0	0	0	0	0	125	71	87	94	35	128	9	6	0	0	0	0	0	2	2	1	0
COTU-CM-2028	0	0	0	13	0	0	0	0	0	0	0	0	0	0	0	0	0	0	1	1	0	0	1	2	0	0	0	0	1	1	0	0	69	83	78	52	19	53	39	40	21	26	0	0	0	0	0	0	0
COTU-CM-2029	1414	1143	1651	2665	651	582	1522	2232	1048	1306	1491	1244	1628	1926	886	913	325	570	91	1281	164	230	343	446	421	1009	172	128	369	450	422	380	136	118	115	91	34	110	212	180	230	367	1	1	0	1	0	0	2
COTU-CM-2030	0	0	0	0	0	0	0	0	0	0	0	0	0	0	0	0	0	0	0	0	0	0	0	0	0	0	0	0	0	0	0	0	111	123	114	79	48	117	2	0	9	12	1	0	0	0	0	0	0
COTU-CM-2031	0	0	0	0	0	0	0	0	0	0	0	0	0	0	0	0	0	0	0	0	0	0	0	0	0	0	0	0	0	0	0	0	168	131	156	97	30	104	316	249	0	0	3	0	5	0	1	2	10
COTU-CM-2032	0	0	0	0	0	0	0	0	0	0	0	0	0	0	0	0	0	0	0	0	0	0	0	0	0	0	0	0	0	0	0	0	21	22	16	7	0	6	0	0	6	9	0	1	0	0	0	0	0
COTU-CM-2033	0	0	0	0	0	0	4	2	3	0	0	0	2	0	0	0	0	0	0	0	0	0	1	3	0	2	1	0	0	0	0	0	94	56	69	73	27	102	26	48	58	54	0	0	0	0	0	1	0
COTU-CM-2034	0	0	0	0	0	0	0	0	0	0	0	0	0	0	0	0	0	0	0	0	0	0	0	0	0	0	0	0	0	0	0	0	52	55	52	31	14	45	136	30	34	23	1	0	0	1	1	1	1
COTU-CM-2035	3	4	12	5	10	30	41	36	1	3	10	1	27	13	1	5	0	12	3	43	9	24	41	54	5	26	2	1	22	22	7	11	186	141	192	75	32	131	0	0	0	0	3	4	4	19	20	13	0
COTU-CM-2036	0	0	1	0	0	0	1	3	0	0	0	0	0	0	0	0	0	0	0	0	0	0	0	1	0	0	0	0	0	0	0	0	10	11	8	8	5	4	176	116	26	43	0	0	0	0	0	0	0
COTU-CM-2037	0	0	0	0	0	0	0	0	0	0	0	0	0	0	0	0	0	0	0	0	0	0	0	0	0	0	0	0	0	0	0	0	142	105	116	67	28	64	1	0	29	24	0	1	1	0	4	0	0
COTU-CM-2038	0	0	0	0	0	0	0	0	0	0	0	0	0	0	0	0	0	0	0	0	0	0	0	0	0	0	0	0	0	0	0	0	0	0	0	1	1	0	0	1	125	54	0	0	0	0	0	0	0
COTU-CM-2039	0	0	0	0	0	0	0	0	0	0	0	0	0	0	0	0	0	0	0	0	0	0	0	0	0	0	0	0	0	0	0	0	1312	1054	1287	817	324	918	2104	966	1609	2150	7	0	15	16	16	17	11
COTU-CM-2040	0	0	0	0	0	0	0	0	0	0	0	0	0	0	0	0	0	0	0	0	0	0	0	0	0	0	0	0	0	0	0	0	18	17	22	8	1	9	59	46	3	3	0	0	0	0	0	0	0
COTU-CM-2041	0	0	0	0	0	0	0	0	0	0	0	0	0	0	0	0	0	0	0	0	0	0	0	0	0	0	0	0	0	0	0	0	44	36	44	31	17	53	33	72	27	74	0	0	0	0	0	0	0
COTU-CM-2042	0	0	0	0	0	0	0	0	0	0	0	0	0	0	0	0	0	0	0	0	0	0	0	0	0	0	0	0	0	0	0	0	33	39	38	19	10	29	24	53	128	250	0	0	0	0	0	0	0
COTU-CM-2043	3	0	0	0	0	0	0	0	0	0	0	2	0	0	0	0	0	1	0	0	0	0	0	0	0	0	0	0	0	0	0	0	136	112	121	73	28	63	88	35	77	70	0	1	0	0	0	0	2
COTU-CM-2044	0	0	0	0	0	0	0	0	0	0	0	0	0	0	0	0	0	0	0	0	0	0	0	0	0	0	0	0	0	0	0	0	75	49	50	24	8	21	20	52	2	3	0	0	0	0	0	0	0
COTU-CM-2045	0	0	0	0	0	0	0	0	0	0	0	0	0	0	0	0	0	0	0	0	0	0	0	0	0	0	0	0	0	0	0	0	313	284	284	230	128	315	353	159	172	140	2	6	3	8	8	8	3
COTU-CM-2046	0	0	0	0	0	0	0	0	0	0	0	0	8	5	0	0	0	0	0	0	0	0	0	0	0	0	0	0	5	15	0	0	14	5	8	9	4	13	106	60	2	3	0	0	0	0	0	0	1
COTU-CM-2047	2	4	0	0	0	0	18	17	0	0	47	19	9	6	0	0	0	5	0	0	0	0	5	19	0	0	10	0	0	14	1	0	36	28	37	9	1	31	335	361	265	357	0	0	0	0	0	1	0
COTU-CM-2048	0	0	0	0	0	0	0	0	0	0	0	0	0	0	0	0	0	0	0	0	0	0	0	0	0	0	0	0	0	0	0	0	50	32	42	19	13	47	20	18	4	4	0	0	0	0	1	2	1
COTU-CM-2049	0	0	0	0	0	0	0	0	0	0	0	0	0	0	0	0	0	0	0	0	0	0	0	0	0	0	0	0	0	0	0	0	16	10	10	11	4	5	13	6	94	126	0	0	0	0	1	0	0
COTU-CM-2050	0	0	0	0	0	0	0	0	0	0	0	0	0	0	0	0	0	0	0	0	0	0	0	0	0	0	0	0	0	0	0	0	10	9	8	9	0	0	14	15	0	9	0	0	0	0	0	0	0
COTU-CM-2051	0	3	7	6	7	0	2	6	5	6	5	18	11	10	13	19	1	2	0	2	1	3	0	1	6	14	0	2	2	3	5	7	12	13	16	15	3	13	38	59	13	23	0	1	0	1	0	0	1
COTU-CM-2052	0	0	0	0	0	0	0	5	0	0	0	0	0	0	0	0	0	0	0	0	0	0	0	0	0	0	0	0	0	0	0	0	13	13	6	12	2	10	8	6	0	19	0	0	1	0	0	0	0
COTU-CM-2053	44	51	54	51	41	51	49	53	51	28	61	185	53	83	39	53	10	40	5	19	16	24	11	10	54	25	21	19	17	27	17	12	2	0	1	1	1	2	2	4	1	5	0	0	0	0	0	0	0
COTU-CM-2054	2	4	8	16	0	0	2	1	29	6	1	20	8	8	1	0	1	0	3	4	0	1	0	0	3	3	0	0	1	6	2	2	0	0	0	1	0	1	1	0	1	1	0	0	0	0	0	0	0
COTU-CM-2055	21	35	59	160	37	27	49	42	24	11	68	91	50	52	22	52	1	27	4	51	6	22	12	24	8	13	15	8	8	21	6	70	3	1	3	1	4	2	15	7	0	3	0	0	0	0	0	0	3
COTU-CM-2056	0	0	0	0	0	0	0	0	0	0	0	0	0	9	0	0	0	0	0	0	0	0	0	0	0	0	0	0	0	0	0	0	556	518	621	648	240	821	313	140	241	213	6	10	7	12	6	24	14
COTU-CM-2057	0	0	0	0	0	0	0	0	0	0	0	0	0	0	0	0	0	0	0	0	0	0	0	0	0	0	0	0	0	0	0	0	34	26	28	22	7	17	34	23	52	66	0	0	0	1	0	0	0
COTU-CM-2058	0	0	0	0	0	0	0	0	0	0	0	0	0	0	0	0	0	0	0	0	0	0	0	0	0	0	0	0	0	0	0	0	298	205	237	169	57	187	829	464	351	525	0	0	6	6	0	0	19
COTU-CM-2059	0	0	0	0	0	0	5	8	0	0	0	0	0	0	0	0	0	0	0	0	0	0	8	11	0	0	0	0	0	0	0	0	62	38	48	62	23	71	38	37	3	41	1	0	3	1	1	1	0
COTU-CM-2060	0	0	0	0	0	0	0	0	0	0	0	0	0	0	0	0	0	0	0	0	0	0	0	0	0	0	0	0	0	0	0	0	65	56	51	44	30	76	21	21	21	52	1	0	2	7	2	17	0
COTU-CM-2061	0	0	0	0	0	0	0	0	0	0	0	0	0	0	0	0	0	0	0	0	0	0	0	0	0	0	0	0	0	0	0	0	16	16	16	18	8	18	11	7	27	70	0	0	0	0	0	0	0
COTU-CM-2062	31	48	67	68	68	41	101	68	39	40	119	106	118	59	63	120	9	44	12	45	26	38	37	40	40	76	40	9	28	56	53	72	94	78	58	40	21	34	100	54	109	122	2	3	3	4	0	9	11
COTU-CM-2063	0	0	0	0	0	0	0	0	0	0	0	0	0	0	0	0	0	0	0	0	0	0	0	0	0	0	0	0	0	0	0	0	284	269	239	330	224	439	0	0	2	18	2	3	2	22	12	14	0
COTU-CM-2064	0	0	0	0	0	0	0	0	0	0	0	0	0	0	0	0	0	0	0	0	0	0	0	0	0	0	0	0	0	0	0	0	122	113	115	137	50	128	233	663	31	187	1	1	0	3	0	3	0
COTU-CM-2065	0	0	0	0	0	0	0	0	0	0	0	0	0	0	0	0	0	0	0	0	0	0	0	0	0	0	0	0	0	0	0	0	551	576	582	361	204	500	19	16	0	0	3	8	7	12	5	0	3
COTU-CM-2066	0	0	0	0	0	0	0	0	0	0	0	0	0	0	0	0	0	0	0	0	0	0	0	0	0	0	0	0	0	0	0	0	123	70	102	84	28	115	0	1	0	1	1	0	2	1	2	0	0
COTU-CM-2067	0	0	0	0	0	0	0	0	0	0	0	0	0	0	0	0	0	0	0	0	0	0	0	0	0	0	0	0	0	0	0	0	0	0	0	0	0	0	331	125	163	176	0	0	0	0	0	0	4
COTU-CM-2068	98	154	274	311	94	48	25	50	290	318	41	68	46	54	460	368	10	67	34	75	23	15	2	35	95	118	12	1	8	10	104	200	17	7	17	22	5	15	11	9	13	15	0	0	0	0	0	0	1
COTU-CM-2069	0	0	0	0	0	0	0	0	0	0	0	0	0	0	0	0	0	0	0	0	0	0	0	0	0	0	0	0	0	0	0	0	0	0	0	0	0	0	1	0	192	347	0	0	0	0	0	0	0
COTU-CM-2071	0	0	0	0	0	0	0	0	0	0	0	0	0	0	0	0	0	0	0	0	0	0	0	0	0	0	0	0	0	0	0	0	15	18	17	7	9	9	17	51	9	43	3	5	6	4	13	6	15
COTU-CM-2072	0	0	0	0	0	0	0	0	0	0	0	0	0	0	0	0	0	0	0	0	0	0	0	0	0	0	0	0	0	0	0	0	11	16	8	17	3	12	14	3	2	13	6	8	11	1	0	3	10
COTU-CM-2073	3	12	9	7	28	15	10	11	0	0	41	4	3	14	5	5	0	3	1	0	4	0	2	7	0	0	2	2	3	0	0	2	9	5	8	12	6	2	23	17	11	19	0	0	0	0	0	0	1
COTU-CM-2074	229	270	953	582	298	242	405	437	350	211	624	75	487	412	321	367	13	76	67	122	52	36	101	150	55	70	53	9	66	51	63	70	72	84	57	48	26	74	100	117	22	60	2	3	2	0	4	0	2
COTU-CM-2075	0	0	0	0	0	0	4	21	0	0	0	0	1	0	0	0	0	0	0	0	0	0	1	2	0	0	2	0	0	0	0	0	30	31	29	33	11	34	37	42	34	66	0	0	1	0	1	4	1
COTU-CM-2076	573	1060	537	812	271	399	610	776	1483	936	853	526	296	340	526	216	214	474	132	864	109	105	288	637	195	549	217	212	108	104	75	319	0	0	0	0	0	0	0	0	0	0	0	0	0	0	0	0	0
COTU-CM-2077	0	0	0	0	0	0	0	0	0	0	0	0	0	0	0	0	0	0	0	0	0	0	0	0	0	0	0	0	0	0	0	0	17	21	28	20	7	30	49	8	38	17	0	0	0	1	0	0	0
COTU-CM-2078	0	0	0	0	0	0	0	0	0	0	0	0	0	10	0	0	0	0	0	0	0	0	0	0	0	0	0	0	0	0	0	0	879	784	845	674	279	853	794	406	236	206	4	4	2	2	0	18	0
[truncated: 5 more columns]

## Sheet: Absolute total abundance
Title: Absolute total abudances of all cecal samples including technical replicates.
Sample	Absolute total abudance (copies/mg)	Standard deviation (N = 4 or 5)	N
VDadist	96100000	7700000	4
VDadist-ecDNA	54000000	3600000	4
VDaprox	88300000	10300000	4
VDaprox-ecDNA	65700000	5100000	4
VDbdist	69900000	4500000	4
VDbdist-ecDNA	89300000	34500000	4
VDbprox	48200000	2400000	4
VDbprox-ecDNA	15100000	900000	4
VDcdist	149000000	17000000	4
VDcdist-ecDNA	76200000	16900000	4
VDcprox	59800000	3000000	4
VDcprox-ecDNA	28200000	1100000	4
VDddist	108000000	3000000	4
VDddist-ecDNA	30800000	3700000	4
VDdprox	95100000	1100000	4
VDdprox-ecDNA	20300000	1500000	4
CEadist-Unfiltered	96300000	4700000	5
CEadist1	80200000	4700000	5
CEadist1-ecDNA	2010000	160000	5
CEadist2	80800000	7200000	5
CEadist2-ecDNA	2010000	100000	5
CEadist3	82000000	8500000	5
CEadist3-ecDNA	1800000	210000	5
CEaprox-Unfiltered	50400000	6900000	5
CEaprox1	53000000	6000000	5
CEaprox1-ecDNA	1280000	60000	5
CEaprox2	48200000	2600000	5
CEaprox2-ecDNA	1340000	120000	5
CEaprox3	43200000	3900000	5
CEaprox3-ecDNA	1250000	120000	5
CEbdist	85200000	7000000	5
CEbdist-ecDNA	1160000	190000	5
CEbdist-Unfiltered	121000000	15000000	5
CEbprox	50500000	5700000	5
CEbprox-ecDNA	1370000	360000	5
CEbprox-Unfiltered	66700000	6400000	5
CEcdist	113000000	9000000	5
CEcdist-ecDNA	4970000	790000	5
CEcdist-Unfiltered	118000000	15000000	5
CEcprox	77400000	6000000	5
CEcprox-ecDNA	1800000	210000	5
CEcprox-Unfiltered	103000000	3000000	5
CEddist	84000000	7700000	5
CEddist-ecDNA	859000	223000	5
CEddist-Unfiltered	92200000	6400000	5
CEdprox	53900000	2800000	5
CEdprox-ecDNA	876000	92000	5
CEdprox-Unfiltered	63100000	10500000	5
VSadist	73400000	5600000	4
VSadist-ecDNA	51800000	4700000	4
VSaprox	29900000	1100000	4
VSaprox-ecDNA	9650000	1180000	4
VSbdist	89900000	15700000	4
VSbdist-ecDNA	56600000	3600000	4
VSbprox	40400000	2600000	4
VSbprox-ecDNA	3300000	200000	4
VScdist	57400000	5600000	4
VScdist-ecDNA	25000000	2700000	4
VScprox	43900000	2600000	4
VScprox-ecDNA	18300000	1900000	4
VSddist	143000000	12000000	4
VSddist-ecDNA	39200000	500000	4
VSdprox	42000000	6500000	4
VSdprox-ecDNA	14300000	1600000	4

## Sheet: Absolute abundance
Title: Absolute abudance of each cOTU of all cecal samples including technical replicates.
cOTU-ID	VDadist	VDaprox	VDbdist	VDbprox	VDcdist	VDcprox	VDddist	VDdprox	VSadist	VSaprox	VSbdist	VSbprox	VScdist	VScprox	VSddist	VSdprox	VDadist-ecDNA	VDaprox-ecDNA	VDbdist-ecDNA	VDbprox-ecDNA	VDcdist-ecDNA	VDcprox-ecDNA	VDddist-ecDNA	VDdprox-ecDNA	VSadist-ecDNA	VSaprox-ecDNA	VSbdist-ecDNA	VSbprox-ecDNA	VScdist-ecDNA	VScprox-ecDNA	VSddist-ecDNA	VSdprox-ecDNA	CEadist1	CEadist2	CEadist3	CEaprox1	CEaprox2	CEaprox3	CEbdist	CEbprox	CEcdist	CEcprox	CEadist1-ecDNA	CEadist2-ecDNA	CEadist3-ecDNA	CEaprox1-ecDNA	CEaprox2-ecDNA	CEaprox3-ecDNA	CEbdist-ecDNA
COTU-CM-0001	0	0	0	0	0	0	0	0	0	0	0	0	0	0	0	0	0	0	0	0	0	0	0	0	0	0	0	0	0	0	0	0	19455.6	13583.6	25790.2	0	15839.6	4930.94	55875.3	18258.5	68613.8	17635.8	8815.79	0	0	0	0	0	11788.6
COTU-CM-0004	115240	108515	80490.2	18359.1	193632	27148.9	95575.2	99493	37913.2	39049.2	105699	234910	163498	59361.8	239306	91180.5	29094.8	25620.7	19278.9	6542.06	10301.5	4054.64	15344.4	42100.8	21547.4	15265	22973.9	1621.62	6860.59	25354.1	35488	9852.56	0	0	0	0	0	0	0	0	0	3527.16	0	0	0	0	0	0	0
COTU-CM-0005	0	0	0	0	0	0	0	0	0	0	0	0	0	0	0	0	0	0	0	0	0	0	0	0	0	0	0	0	0	0	0	0	81713.6	81501.8	73072.3	51049.2	31679.3	17258.3	82169.6	24344.7	178396	91706.2	0	0	0	0	0	0	0
COTU-CM-0006	0	0	0	0	0	0	0	0	0	0	0	0	0	0	0	0	0	0	0	0	0	0	0	0	0	0	0	0	0	0	0	0	31129	45278.8	30088.6	18231.9	7919.82	34516.6	19720.7	18258.5	96059.3	109342	0	0	0	0	0	1950.08	0
COTU-CM-0007	0	0	0	0	0	0	74336.3	38266.5	0	0	12435.2	0	0	0	0	0	0	0	0	0	0	0	15344.4	7429.55	0	0	0	0	0	0	0	0	50584.6	18111.5	34387	14585.5	7919.82	12327.4	88743.2	48689.4	54891	42325.9	0	0	0	0	0	0	0
COTU-CM-0008	0	7751.05	0	0	0	0	53097.3	7653.31	0	0	0	0	0	0	0	0	0	0	0	0	0	0	0	7429.55	0	0	0	0	0	0	0	0	0	27167.3	0	7292.74	0	4930.94	6573.57	3043.09	13722.8	14108.6	0	0	0	0	0	0	0
COTU-CM-0009	0	0	0	0	0	0	0	0	0	0	0	0	0	31659.6	0	0	0	0	0	0	0	0	0	0	0	0	0	0	0	0	0	0	0	0	0	0	0	0	0	0	0	0	0	0	0	0	0	0	0
COTU-CM-0010	618107	651088	218473	183591	661577	253390	1.51858e+06	910744	1.73643e+06	613073	422795	433680	333052	352213	4.11306e+06	729444	65463.4	256207	0	8411.21	10301.5	16218.5	207149	71819	251387	49611.1	68921.7	6486.49	185236	39439.7	326489	49262.8	466935	493539	468522	251600	324712	234220	6573.57	0	41168.3	0	8815.79	0	0	5605.84	3517.06	9750.39	0
COTU-CM-0011	0	0	0	0	0	0	0	0	7582.64	0	0	0	0	0	89739.6	0	0	0	0	0	0	0	0	0	0	0	0	0	0	0	0	0	0	0	0	0	0	0	0	0	0	0	0	0	0	0	0	0	0
COTU-CM-0012	0	0	0	0	0	0	0	0	0	0	0	0	0	0	0	0	0	0	0	0	0	0	0	0	0	0	0	0	0	0	0	0	0	0	0	0	0	0	23007.5	0	0	0	0	0	0	0	0	0	0
COTU-CM-0013	136193	46506.3	11498.6	14687.3	0	9049.64	10619.5	30613.2	7582.64	0	0	0	0	0	0	0	7273.71	25620.7	9639.46	934.579	0	0	7672.19	2476.52	0	0	0	0	0	0	0	0	0	0	0	0	0	0	0	0	0	0	0	0	0	0	0	0	0
COTU-CM-0014	4.29532e+06	2.86014e+06	287465	293746	1.09725e+06	733021	2.46372e+06	1.77557e+06	1.44829e+06	1.55806e+06	640411	415610	296719	542171	628177	222252	720097	734460	0	21495.3	123618	72983.5	326068	210504	495591	49611.1	222081	0	68605.9	138039	0	45321.8	3891.13	9055.76	0	7292.74	0	0	0	0	0	0	0	0	0	0	0	0	0
COTU-CM-0015	303816	193776	11498.6	25702.8	112952	54297.8	116814	145413	90991.7	54668.9	68393.4	22587.5	6055.49	31659.6	14956.6	5698.78	50915.9	42701.2	0	934.579	20602.9	0	11508.3	12382.6	14364.9	3816.24	0	0	0	8451.35	0	0	0	0	0	0	0	0	0	0	0	0	0	0	0	0	0	0	0
COTU-CM-0016	0	0	0	0	0	0	0	0	0	0	0	0	0	0	0	0	0	0	0	0	0	0	0	0	0	0	0	0	0	0	0	0	3891.13	0	0	0	0	0	65735.7	54775.5	20584.1	17635.8	0	0	0	0	0	0	0
COTU-CM-0017	0	0	0	0	0	0	0	0	0	0	0	0	0	0	0	0	0	0	0	0	0	0	0	0	0	0	0	0	0	0	0	0	54475.8	72446.1	42983.7	10939.1	7919.82	7396.42	0	0	89197.9	0	0	0	0	3737.23	1758.53	1950.08	0
COTU-CM-0018	0	0	0	0	0	0	0	0	0	0	0	0	0	0	0	0	0	0	0	0	0	0	0	0	0	0	0	0	0	0	0	0	23346.8	18111.5	25790.2	18231.9	0	2465.47	0	0	75475.1	38798.8	8815.79	0	0	1868.61	0	0	0
COTU-CM-0020	0	0	0	0	0	0	0	0	0	0	0	0	0	0	0	0	0	0	0	0	0	0	0	0	0	0	0	0	0	0	0	41380.7	0	0	0	0	0	0	0	0	0	0	0	0	0	0	0	0	0
COTU-CM-0021	0	0	0	0	0	0	0	0	0	0	0	0	0	0	0	0	0	0	0	0	0	0	0	0	0	0	0	0	0	0	99366.3	0	0	0	0	0	0	0	0	0	0	0	0	0	0	0	0	0	0
COTU-CM-0022	0	0	0	0	0	0	0	0	0	0	0	0	0	0	0	0	0	0	0	0	0	0	0	0	0	0	0	6486.49	0	0	0	0	0	0	0	0	0	0	0	0	0	0	0	0	0	0	0	0	0
COTU-CM-0023	0	0	0	0	0	0	0	0	144070	15619.7	366837	94867.5	6055.49	11872.4	0	0	0	0	0	0	0	0	0	0	28729.9	2544.16	76579.6	15405.4	0	2817.12	0	0	221794	230922	249305	80220.2	118797	39447.6	167626	51732.4	123505	24690.1	0	0	0	1868.61	3517.06	5850.23	0
COTU-CM-0024	0	0	0	0	0	0	0	0	0	0	0	0	0	0	0	0	0	0	0	0	0	0	0	0	0	0	0	0	0	0	0	0	7782.25	27167.3	34387	0	7919.82	2465.47	36154.6	9129.26	6861.38	3527.16	0	0	0	0	0	0	0
COTU-CM-0025	0	0	0	0	0	0	0	0	106157	42954.2	323314	99385	6055.49	19787.3	0	0	0	0	0	0	0	0	0	0	0	10176.6	183791	12162.2	6860.59	0	0	0	2.77826e+06	2.88426e+06	2.6306e+06	802202	815741	700194	1.94578e+06	492980	1.96921e+06	366825	8815.79	6000	10619.5	31766.4	63307.1	33151.3	4715.45
COTU-CM-0026	0	0	0	0	0	0	0	0	0	0	0	0	0	0	0	0	0	0	0	0	0	0	0	0	0	0	0	0	0	0	0	0	338528	339591	378257	401101	269274	273667	354973	203887	315623	158722	0	0	31858.4	0	0	0	0
COTU-CM-0031	41905.6	23253.2	11498.6	33046.4	0	0	0	0	0	0	0	0	0	0	613220	102578	0	0	0	13084.1	0	0	0	2476.52	0	0	0	0	0	0	28390.4	45321.8	0	0	0	0	0	0	0	0	0	0	0	0	0	0	0	0	0
COTU-CM-0033	41905.6	23253.2	11498.6	25702.8	96816.1	54297.8	116814	45919.8	7582.64	0	24870.3	9035	12111	0	44869.8	0	21821.1	42701.2	19278.9	32710.3	82411.8	20273.2	23016.6	12382.6	7182.47	0	45947.8	21081.1	0	2817.12	28390.4	5911.53	0	0	0	0	0	0	0	0	0	0	0	0	0	0	0	0	0
COTU-CM-0034	0	0	0	0	112952	0	0	0	0	0	0	0	0	0	0	0	0	0	0	0	0	0	0	0	0	0	0	0	0	0	0	0	0	0	0	0	0	0	0	0	0	0	0	0	0	0	0	0	0
COTU-CM-0035	20952.8	23253.2	22997.2	25702.8	145224	27148.9	127434	53573.2	0	0	74611	9035	12111	3957.45	29913.2	0	14547.4	59781.6	57836.8	29906.5	195728	60819.6	49869.2	9906.06	0	0	45947.8	12162.2	3430.3	5634.24	7097.59	1970.51	0	0	0	0	0	0	0	0	0	0	0	0	0	0	0	0	0
COTU-CM-0036	0	0	0	0	0	0	0	0	0	0	0	0	0	0	0	0	0	0	0	0	0	0	0	0	0	0	0	810.811	0	0	0	0	0	9055.76	8596.74	7292.74	0	7396.42	59162.1	3043.09	34306.9	3527.16	0	0	0	0	0	0	0
COTU-CM-0037	94287.6	108515	22997.2	66092.8	145224	90496.4	84955.8	68879.8	0	19524.6	24870.3	27105	48443.9	15829.8	44869.8	5698.78	7273.71	85402.3	28918.4	19626.2	41205.9	20273.2	7672.19	7429.55	0	0	22973.9	2432.43	17151.5	16902.7	0	9852.56	27237.9	36223	30088.6	21878.2	31679.3	27120.2	75596	24344.7	13722.8	7054.32	0	0	0	0	0	0	0
COTU-CM-0038	104764	178274	91988.8	117498	419536	226241	127434	130106	37913.2	3904.92	49740.6	31622.5	42388.4	31659.6	224349	68385.3	29094.8	145184	9639.46	40186.9	103015	44601	61377.5	17335.6	7182.47	8904.56	53605.7	3243.24	10290.9	5634.24	28390.4	15764.1	15564.5	0	42983.7	32817.3	15839.6	17258.3	49301.8	9129.26	34306.9	10581.5	0	0	0	0	0	0	0
COTU-CM-0039	0	0	0	0	0	0	0	0	0	0	0	0	0	3957.45	0	0	0	0	0	0	0	0	0	0	0	0	0	0	0	0	0	0	2.20627e+06	2.69862e+06	2.50165e+06	1.04286e+06	1.25925e+06	1.12426e+06	1.86361e+06	401687	1.72221e+06	455004	96973.7	96000	106195	41109.5	43963.3	11700.5	51869.9
COTU-CM-0040	0	0	0	0	0	0	0	0	0	0	0	0	6055.49	7914.9	14956.6	0	0	0	0	0	0	0	0	0	0	0	0	0	0	0	0	0	85604.8	86029.7	77370.7	102098	39599.1	39447.6	147905	60861.7	68613.8	10581.5	0	0	0	0	0	0	0
COTU-CM-0041	10476.4	15502.1	40245.1	69764.6	209768	81446.7	10619.5	45919.8	30330.6	7809.85	37305.5	13552.5	12111	43532	74783	22795.1	7273.71	42701.2	19278.9	17757	41205.9	8109.27	15344.4	17335.6	0	1272.08	7657.96	6486.49	6860.59	8451.35	0	3941.02	0	0	0	0	0	0	0	0	0	0	0	0	0	0	0	0	0
COTU-CM-0042	115240	31004.2	17247.9	14687.3	64544.1	36198.5	63716.8	7653.31	0	0	0	0	12111	3957.45	29913.2	5698.78	7273.71	25620.7	0	3738.32	0	0	0	0	0	0	0	0	3430.3	2817.12	0	1970.51	42802.4	63390.3	94564.1	61988.3	39599.1	14792.8	108464	45646.3	96059.3	38798.8	0	0	0	0	0	0	0
COTU-CM-0043	429532	387553	114986	88123.7	1.06498e+06	316737	180531	229599	197149	97623.1	404143	40657.5	484439	391788	3.08106e+06	427408	181843	187885	115674	49532.7	175125	64874.2	38360.9	74295.5	79007.2	35618.2	283345	9729.73	281284	115502	461343	364545	0	0	0	0	0	0	0	0	0	0	0	0	0	0	0	0	0
COTU-CM-0046	0	0	0	0	0	0	0	0	0	0	0	0	0	0	0	0	0	0	0	0	0	0	0	0	0	0	0	0	0	0	0	0	249032	239978	210620	105745	126717	115877	262943	66947.9	247010	52907.4	0	6000	0	0	1758.53	0	0
COTU-CM-0049	0	0	0	0	0	0	0	0	0	0	0	0	0	0	0	0	0	0	0	0	0	0	0	0	0	0	0	0	0	0	0	0	85604.8	67918.2	77370.7	87512.9	79198.2	61636.8	42728.2	9129.26	20584.1	28217.3	0	0	0	0	0	0	0
COTU-CM-0051	0	0	0	0	0	0	0	0	0	0	0	0	0	0	0	0	0	0	0	0	0	0	0	0	0	0	0	0	0	0	0	0	15564.5	22639.4	8596.74	14585.5	7919.82	22189.2	3286.78	0	13722.8	14108.6	0	0	0	0	0	0	0
COTU-CM-0056	0	0	0	0	0	0	0	0	0	0	0	0	0	0	0	0	0	0	0	0	0	0	0	0	0	0	0	11351.4	0	0	0	0	0	0	0	0	0	0	0	0	0	0	0	0	0	0	0	0	0
COTU-CM-0057	52382	38755.3	5749.3	3671.82	161360	36198.5	10619.5	53573.2	68243.8	7809.85	74611	13552.5	0	15829.8	74783	11397.6	21821.1	25620.7	19278.9	5607.48	30904.4	4054.64	7672.19	4953.03	7182.47	1272.08	15315.9	0	0	2817.12	0	3941.02	0	0	0	0	0	0	0	0	0	0	0	0	0	0	0	0	0
COTU-CM-0058	220004	100764	86239.5	18359.1	258176	153844	201770	183679	144070	31239.4	143004	45175	36332.9	23744.7	179479	11397.6	43642.2	111023	38557.9	1869.16	61808.8	20273.2	46033.1	24765.2	0	1272.08	45947.8	6486.49	10290.9	5634.24	7097.59	9852.56	0	0	0	0	0	0	0	0	0	0	0	0	0	0	0	0	0
COTU-CM-0059	31429.2	38755.3	0	0	48408.1	36198.5	21238.9	30613.2	0	0	24870.3	9035	12111	0	0	0	36368.5	42701.2	0	4672.9	0	0	30688.8	27241.7	0	1272.08	0	0	0	0	0	1970.51	0	0	0	0	0	0	0	0	0	0	0	0	0	0	0	0	0
COTU-CM-0060	104764	31004.2	28746.5	7343.64	64544.1	36198.5	95575.2	99493	7582.64	7809.85	62175.8	18070	0	11872.4	149566	0	72737.1	136644	19278.9	5607.48	61808.8	4054.64	49869.2	24765.2	0	2544.16	130185	0	3430.3	0	14195.2	1970.51	0	0	0	0	0	0	0	0	0	0	0	0	0	0	0	0	0
COTU-CM-0061	0	0	0	0	0	0	0	0	0	0	0	0	0	0	0	0	0	0	0	0	0	0	0	0	0	0	0	0	0	0	0	0	105060	144892	94564.1	69281	102958	39447.6	108464	27387.8	89197.9	24690.1	0	0	0	0	1758.53	0	0
COTU-CM-0063	0	0	0	0	0	0	0	0	0	0	0	0	0	0	0	0	0	0	0	0	0	0	0	0	0	0	0	0	0	0	0	0	46693.5	31695.2	38685.3	21878.2	31679.3	32051.1	6573.57	3043.09	13722.8	14108.6	0	0	0	0	1758.53	0	0
COTU-CM-0064	73334.8	77510.5	0	3671.82	0	0	0	0	0	0	0	0	0	0	0	0	14547.4	25620.7	9639.46	1869.16	0	0	0	0	0	0	0	0	0	0	0	0	0	0	0	0	0	0	0	0	6861.38	0	0	0	0	0	0	0	0
COTU-CM-0065	0	0	5749.3	7343.64	0	0	10619.5	53573.2	0	0	0	0	0	0	0	0	0	0	0	0	0	0	0	2476.52	7182.47	0	0	810.811	0	0	0	0	0	0	0	0	0	0	0	0	0	0	0	0	0	0	0	0	0
COTU-CM-0066	0	0	0	0	0	0	0	0	0	0	0	36140	0	0	0	0	0	0	0	0	0	0	0	0	0	0	0	0	0	0	0	0	0	0	0	0	0	0	0	0	0	0	0	0	0	0	0	0	0
COTU-CM-0069	0	0	0	0	0	0	0	0	0	0	0	0	0	0	0	0	0	0	0	0	0	0	0	19812.1	0	0	0	0	0	0	0	0	0	0	0	0	0	0	0	0	0	0	0	0	0	0	0	0	0
COTU-CM-0070	0	0	0	0	0	0	0	0	7582.64	0	0	0	6055.49	0	0	5698.78	0	0	0	0	0	0	0	0	0	0	0	0	0	0	0	17734.6	0	0	0	0	0	0	0	0	0	0	0	0	0	0	0	0	0
COTU-CM-0071	0	0	0	0	0	0	0	0	0	0	0	0	0	0	0	0	0	0	0	0	0	0	0	29718.2	0	0	0	0	0	0	0	0	0	0	0	0	0	0	0	0	0	0	0	0	0	0	0	0	0
COTU-CM-0072	408580	372051	74740.9	143201	1.16179e+06	217191	1.36991e+06	673491	212314	23429.5	621758	176182	84776.9	114766	598264	28493.9	320043	401391	337381	59813.1	432662	101366	352921	277370	71824.7	13992.9	459478	33243.2	65175.6	28171.2	113561	86702.5	1.96891e+06	2.03302e+06	1.92567e+06	762092	696944	530076	1.97207e+06	450377	988038	222211	0	84000	5309.73	13080.3	19343.8	3900.16	9430.89
COTU-CM-0073	0	0	0	0	0	0	10619.5	0	7582.64	0	0	0	0	0	0	0	0	76862.1	0	0	0	0	0	0	0	0	0	0	0	0	0	0	3891.13	0	0	0	0	0	0	0	6861.38	0	0	0	0	0	0	0	0
COTU-CM-0074	660013	682093	264468	190935	1.29088e+06	235291	1.55044e+06	880130	212314	50764	659064	135525	54499.4	110809	613220	51289	472791	649058	568728	128037	782912	158131	514037	346712	79007.2	34346.2	428846	57567.6	34303	19719.8	120659	72908.9	630362	552401	674844	255246	174236	147928	598195	167370	260732	77597.5	26447.4	0	0	1868.61	1758.53	0	2357.72
COTU-CM-0075	0	0	0	0	0	0	0	0	0	0	0	0	0	0	0	0	0	0	0	0	0	0	0	0	0	0	0	0	0	0	0	0	3891.13	18111.5	17193.5	3646.37	0	0	6573.57	0	34306.9	7054.32	0	0	0	0	0	0	0
COTU-CM-0076	0	0	0	0	0	0	0	0	0	0	0	0	0	0	0	0	0	0	0	0	0	0	0	0	0	0	0	0	0	0	0	0	1.03893e+06	905576	1.03591e+06	331820	348472	295857	1.05177e+06	209973	878256	126978	0	6000	10619.5	1868.61	3517.06	3900.16	0
COTU-CM-0077	0	0	0	0	0	0	0	0	0	0	0	0	0	0	0	0	0	0	0	0	0	0	0	0	0	0	0	0	0	0	0	0	3.8133e+06	4.39657e+06	4.2296e+06	1.79401e+06	1.55228e+06	1.45956e+06	4.41415e+06	973787	4.16486e+06	814774	0	30000	5309.73	9343.07	19343.8	5850.23	14146.3
COTU-CM-0080	0	0	0	0	0	0	0	0	0	0	0	0	0	0	0	0	0	0	0	0	0	0	0	0	0	0	0	0	0	0	0	0	15564.5	13583.6	12895.1	14585.5	31679.3	14792.8	16433.9	3043.09	20584.1	3527.16	0	0	0	0	0	0	0
COTU-CM-0086	0	0	0	0	0	0	0	45919.8	0	0	0	0	0	0	0	0	0	0	0	0	0	0	0	0	0	0	0	0	0	0	0	0	0	0	0	0	0	0	0	0	0	0	0	0	0	0	0	0	0
COTU-CM-0087	0	0	0	0	0	0	0	76533.1	0	0	0	0	0	0	0	0	0	0	0	0	0	0	0	0	0	0	0	0	0	0	0	0	0	0	0	0	0	0	0	0	0	0	0	0	0	0	0	0	0
COTU-CM-0089	0	7751.05	0	0	0	0	74336.3	7653.31	0	0	0	0	0	0	0	0	0	0	0	0	0	0	0	0	0	0	0	0	0	0	0	0	0	0	4298.37	0	0	0	0	0	0	0	0	0	0	0	0	0	0
COTU-CM-0093	0	0	0	0	0	0	0	0	0	0	0	0	0	0	0	0	0	0	0	0	0	0	23016.6	0	0	0	0	0	0	0	0	0	0	0	0	0	0	0	0	0	0	0	0	0	0	0	0	0	0
COTU-CM-0094	0	0	22997.2	11015.5	0	18099.3	21238.9	38266.5	7582.64	0	18652.7	9035	0	3957.45	29913.2	0	14547.4	8540.23	19278.9	7476.64	0	0	3836.09	12382.6	28729.9	0	0	0	0	0	0	0	0	0	0	0	0	0	0	0	0	0	0	0	0	0	0	0	0
COTU-CM-0095	41905.6	38755.3	143733	36718.2	242040	36198.5	138053	91839.7	7582.64	7809.85	62175.8	36140	0	7914.9	44869.8	0	29094.8	68321.9	19278.9	8411.21	20602.9	8109.27	26852.7	19812.1	7182.47	6360.4	15315.9	1621.62	0	5634.24	0	0	0	0	0	0	0	0	0	0	0	0	0	0	0	0	0	0	0
COTU-CM-0096	0	0	0	0	0	0	0	0	0	0	0	0	0	0	0	0	0	0	0	0	0	0	0	0	0	0	0	0	0	0	0	0	31129	18111.5	12895.1	3646.37	15839.6	4930.94	3286.78	3043.09	13722.8	3527.16	0	0	0	1868.61	0	1950.08	0
COTU-CM-0097	0	0	0	0	0	0	0	0	0	0	0	0	0	0	0	0	0	0	0	0	0	0	0	0	0	0	0	0	0	0	0	0	11673.4	13583.6	4298.37	7292.74	23759.4	2465.47	0	0	6861.38	3527.16	0	0	0	0	0	0	0
COTU-CM-0098	0	0	0	0	0	0	0	0	0	0	0	0	0	0	0	0	0	0	0	0	0	0	0	0	0	0	0	0	0	0	0	0	373548	276201	300886	393808	348472	246547	322105	158240	658692	257483	0	0	15929.2	3737.23	0	0	0
COTU-CM-0099	209528	116266	109237	113826	871345	407234	509735	260212	614194	105433	323314	99385	96887.9	158298	1.07687e+06	153867	80010.8	170805	144592	32710.3	247235	141912	184133	136208	409401	86501.5	459478	19459.5	68605.9	67610.8	319392	59115.3	0	0	0	0	0	0	0	0	0	0	0	0	0	0	0	0	0
COTU-CM-0100	0	0	34495.8	0	0	0	0	0	0	0	0	0	0	0	0	0	0	0	0	0	0	0	0	0	0	0	0	0	0	0	0	0	0	0	0	0	0	0	0	0	0	0	0	0	0	0	0	0	0
COTU-CM-0101	0	0	0	0	0	0	0	0	0	0	0	0	0	0	0	0	0	0	0	0	0	0	0	0	0	0	0	0	0	0	0	0	147863	122253	120354	91159.3	95037.8	83826	417421	246490	439128	215157	8815.79	12000	5309.73	1868.61	0	0	0
COTU-CM-0102	73334.8	170523	17247.9	40390	322720	81446.7	191150	214293	98574.4	7809.85	68393.4	49692.5	30277.5	47489.4	254262	11397.6	94558.2	85402.3	9639.46	9345.79	82411.8	40546.4	42197	29718.2	43094.8	6360.4	38289.8	14594.6	6860.59	5634.24	28390.4	9852.56	0	0	0	0	0	0	0	0	0	0	0	0	0	0	0	0	0
COTU-CM-0103	3.0172e+06	2.98416e+06	1.03487e+06	653584	4.92149e+06	1.68323e+06	3.37699e+06	2.80111e+06	197149	62478.8	1.75958e+06	338812	484439	645064	762786	210855	1.38928e+06	1.64826e+06	424136	684112	1.27738e+06	717671	886138	638941	725430	195900	1.15635e+06	510811	192097	177478	120659	88673	0	0	0	0	0	0	0	0	0	0	0	0	0	0	0	0	0
COTU-CM-0104	0	0	0	0	0	0	0	0	0	0	43523.1	0	0	0	0	0	0	0	0	0	0	0	0	0	0	1272.08	0	0	0	0	0	0	0	0	0	0	0	0	0	0	0	0	0	0	0	0	0	0	0
COTU-CM-0105	0	0	0	0	0	0	0	0	0	0	0	0	0	3957.45	0	0	0	0	0	0	0	0	0	0	0	0	0	0	0	0	0	0	303508	525234	447030	335466	221755	295857	542319	203887	343069	151668	0	6000	5309.73	1868.61	1758.53	1950.08	2357.72
COTU-CM-0106	0	7751.05	0	3671.82	0	0	0	7653.31	0	0	0	0	0	0	0	0	0	0	57836.8	1869.16	0	0	3836.09	2476.52	0	0	0	0	0	2817.12	0	0	0	0	0	0	0	0	0	0	0	0	0	0	0	0	0	0	0
COTU-CM-0107	0	0	0	0	258176	63347.5	21238.9	15306.6	0	0	0	0	0	0	0	0	0	0	0	0	20602.9	8109.27	0	0	0	0	7657.96	0	3430.3	0	0	0	0	0	0	0	0	0	0	0	0	0	0	0	0	0	0	0	0
COTU-CM-0108	240957	310042	132234	95467.4	613169	307688	223009	114800	159236	23429.5	111916	54210	133221	118724	179479	28493.9	65463.4	136644	77115.7	11215	185427	40546.4	15344.4	19812.1	7182.47	1272.08	61263.7	0	41163.6	28171.2	0	9852.56	0	0	0	0	0	0	0	0	0	0	0	0	0	0	0	0	0
COTU-CM-0109	10476.4	23253.2	5749.3	22030.9	16136	45248.2	10619.5	15306.6	60661.2	11714.8	37305.5	18070	18166.5	27702.2	29913.2	0	7273.71	0	0	934.579	30904.4	0	3836.09	0	0	2544.16	0	810.811	24012.1	2817.12	0	1970.51	0	0	0	0	0	0	0	0	0	0	0	0	0	0	0	0	0
COTU-CM-0110	251434	232532	103487	95467.4	613169	289588	233628	30613.2	45495.9	11714.8	161657	81315	151387	114766	209392	34192.7	94558.2	93942.5	77115.7	10280.4	175125	85147.4	19180.5	14859.1	21547.4	2544.16	53605.7	4054.05	27442.4	19719.8	14195.2	5911.53	0	0	0	0	0	0	0	0	0	0	0	0	0	0	0	0	0
COTU-CM-0111	523820	503818	229972	168904	1.09725e+06	552028	297345	198986	219897	50764	242486	121972	127165	158298	448698	62686.6	138200	170805	154231	33644.9	226632	28382.5	80558	27241.7	28729.9	7632.48	107211	4054.05	44593.9	16902.7	49683.1	35469.2	0	0	0	0	0	0	0	0	0	0	0	0	0	0	0	0	0
COTU-CM-0112	0	0	0	0	0	0	0	0	0	0	0	4517.5	0	0	0	0	0	0	0	0	0	0	0	0	0	0	0	0	0	0	0	0	124516	285256	266499	98452	79198.2	88757	325392	76077.1	397960	317444	0	0	0	0	5275.59	0	0
COTU-CM-0113	0	0	0	0	0	0	0	0	0	0	0	0	0	0	0	0	0	0	0	0	0	0	0	0	0	0	0	0	0	0	0	0	38911.3	108669	111758	40110.1	39599.1	56705.9	124898	45646.3	157812	190467	0	0	0	0	1758.53	0	4715.45
COTU-CM-0114	0	0	0	0	0	0	0	0	0	0	0	0	0	0	0	0	0	0	0	0	0	0	0	0	0	0	0	0	0	0	0	0	0	13583.6	12895.1	0	0	14792.8	9860.35	0	0	7054.32	0	0	0	0	0	0	0
COTU-CM-0122	0	0	0	0	0	0	0	0	0	0	0	0	0	0	0	0	0	0	0	0	0	0	0	0	0	0	0	0	0	0	0	0	167318	158476	146145	54695.6	63358.5	34516.6	177486	48689.4	288178	123451	0	6000	0	0	0	0	0
COTU-CM-0123	31429.2	23253.2	40245.1	3671.82	64544.1	9049.64	21238.9	15306.6	53078.5	31239.4	24870.3	40657.5	18166.5	19787.3	29913.2	45590.2	21821.1	25620.7	0	4672.9	20602.9	0	3836.09	9906.06	14364.9	6360.4	7657.96	26756.8	13721.2	22536.9	7097.59	5911.53	0	0	0	3646.37	0	2465.47	0	0	0	0	0	6000	0	0	0	1950.08	0
COTU-CM-0124	31429.2	85261.6	5749.3	0	0	0	0	0	45495.9	23429.5	186527	266532	30277.5	7914.9	0	0	0	17080.5	0	1869.16	0	0	0	0	0	0	53605.7	4864.86	0	2817.12	0	0	0	0	0	0	0	0	0	15215.4	6861.38	3527.16	0	0	0	0	0	15600.6	0
COTU-CM-0125	20952.8	46506.3	0	3671.82	0	9049.64	0	0	0	3904.92	24870.3	103902	0	3957.45	0	0	7273.71	0	0	0	0	0	0	0	0	0	7657.96	2432.43	0	2817.12	0	0	0	0	0	0	0	0	0	6086.17	0	0	0	0	0	0	0	0	0
COTU-CM-0126	10476.4	38755.3	0	0	0	0	0	0	22747.9	3904.92	12435.2	36140	0	0	0	0	0	0	0	0	0	0	3836.09	0	0	0	0	3243.24	0	0	0	0	0	0	0	0	0	0	0	3043.09	0	0	0	0	0	0	0	3900.16	0
COTU-CM-0127	209528	271287	5749.3	18359.1	0	0	84955.8	30613.2	113740	97623.1	205180	207805	0	7914.9	0	0	43642.2	153724	0	5607.48	0	0	3836.09	19812.1	14364.9	25441.6	99553.5	20270.3	0	0	0	0	0	0	0	0	0	2465.47	0	6086.17	6861.38	31744.4	0	0	0	0	0	1950.08	0
COTU-CM-0135	62858.4	93012.6	45994.4	40390	96816.1	18099.3	10619.5	0	22747.9	0	31087.9	94867.5	36332.9	31659.6	44869.8	45590.2	29094.8	34160.9	9639.46	14953.3	10301.5	4054.64	0	0	0	1272.08	7657.96	0	0	2817.12	14195.2	5911.53	0	0	0	0	0	0	0	0	0	0	0	0	0	0	0	0	0
COTU-CM-0136	0	0	0	0	0	9049.64	0	0	0	0	0	0	6055.49	0	89739.6	28493.9	0	0	0	0	0	0	0	0	0	0	0	0	0	2817.12	14195.2	5911.53	3891.13	0	0	0	0	0	0	0	0	0	0	0	0	0	0	0	0
COTU-CM-0137	0	0	0	0	0	0	0	0	0	0	0	0	0	0	0	0	0	0	0	0	0	0	0	0	0	0	0	0	0	0	0	0	3891.13	13583.6	12895.1	0	0	7396.42	0	0	13722.8	28217.3	0	0	0	0	0	0	0
COTU-CM-0138	0	0	0	0	0	0	0	0	0	0	0	0	0	0	0	0	0	0	0	0	0	0	0	0	0	0	0	0	0	0	0	0	7782.25	18111.5	12895.1	14585.5	15839.6	4930.94	111751	48689.4	68613.8	102288	0	0	0	0	0	0	0
COTU-CM-0139	0	54257.4	17247.9	22030.9	322720	90496.4	138053	137760	106157	93718.2	105699	36140	24222	55404.3	119653	28493.9	0	0	0	4672.9	61808.8	0	0	0	0	10176.6	0	0	0	0	0	0	11673.4	4527.88	8596.74	3646.37	0	2465.47	0	0	6861.38	0	0	0	0	0	0	0	0
COTU-CM-0140	251434	271287	166730	135857	790665	235291	169912	275519	189566	54668.9	167875	67762.5	108999	94978.8	433741	108277	14547.4	196425	48197.3	25233.6	72110.3	52710.3	7672.19	27241.7	50277.3	12720.8	30631.8	0	6860.59	30988.3	7097.59	3941.02	23346.8	0	0	3646.37	15839.6	7396.42	9860.35	0	20584.1	3527.16	0	0	0	0	0	0	0
COTU-CM-0141	83811.2	178274	57493	47733.7	64544.1	27148.9	42477.9	22959.9	7582.64	3904.92	18652.7	27105	30277.5	35617.1	149566	56987.8	7273.71	85402.3	9639.46	9345.79	10301.5	12163.9	3836.09	0	0	0	15315.9	0	3430.3	2817.12	21292.8	15764.1	0	0	0	0	0	0	0	3043.09	0	3527.16	0	0	0	0	0	0	0
COTU-CM-0142	41905.6	77510.5	120735	36718.2	129088	54297.8	53097.3	76533.1	45495.9	23429.5	12435.2	9035	54499.4	39574.5	134609	56987.8	7273.71	68321.9	9639.46	6542.06	30904.4	28382.5	11508.3	9906.06	28729.9	3816.24	0	0	0	8451.35	14195.2	15764.1	38911.3	13583.6	21491.8	14585.5	7919.82	14792.8	36154.6	18258.5	54891	17635.8	0	0	0	0	0	0	0
COTU-CM-0143	0	0	0	0	0	0	0	0	0	0	0	0	0	0	0	0	0	0	0	0	0	0	0	0	0	0	0	0	0	0	0	0	7782.25	0	0	3646.37	7919.82	0	6573.57	15215.4	13722.8	24690.1	0	0	0	0	0	0	0
COTU-CM-0144	0	31004.2	17247.9	7343.64	32272	27148.9	10619.5	15306.6	7582.64	3904.92	0	13552.5	0	0	14956.6	11397.6	0	8540.23	9639.46	934.579	30904.4	8109.27	0	2476.52	0	10176.6	0	0	0	0	0	0	0	0	0	0	0	0	0	0	0	0	0	0	0	0	0	0	0
COTU-CM-0145	0	0	0	0	0	0	0	0	0	0	0	0	0	0	0	0	0	0	0	0	0	0	0	0	0	0	0	0	0	0	0	0	0	13583.6	25790.2	0	0	4930.94	78882.8	48689.4	48029.6	52907.4	0	0	0	0	0	0	0
COTU-CM-0146	0	0	0	0	0	0	0	0	0	0	0	0	0	0	0	0	0	0	0	0	0	0	0	0	0	0	0	0	0	0	0	0	3891.13	0	4298.37	0	0	4930.94	75596	42603.2	61752.4	35271.6	0	0	0	1868.61	0	0	0
COTU-CM-0149	0	0	0	0	0	0	0	0	0	0	74611	0	0	0	0	0	0	0	0	0	0	0	0	0	0	0	0	0	0	0	0	0	0	0	0	0	0	0	0	0	0	0	0	0	0	0	0	0	0
COTU-CM-0150	0	0	0	0	0	0	0	0	0	0	0	0	0	0	0	0	0	0	0	0	0	0	0	0	0	0	0	0	0	0	0	0	112843	72446.1	68773.9	61988.3	63358.5	29585.7	16433.9	51732.4	96059.3	148141	8815.79	30000	10619.5	11211.7	21102.4	1950.08	4715.45
COTU-CM-0151	0	0	0	0	0	0	0	0	0	0	0	0	0	0	0	0	0	0	0	0	0	0	0	0	0	0	0	0	0	0	0	0	0	0	0	7292.74	0	0	9860.35	18258.5	0	14108.6	0	0	0	0	0	0	2357.72
COTU-CM-0152	0	0	0	0	0	0	0	0	0	0	0	0	0	0	0	0	0	0	0	4672.9	0	0	0	0	0	0	0	0	0	0	0	0	0	0	0	0	0	0	0	0	0	0	0	0	0	18686.1	0	0	0
COTU-CM-0153	62858.4	93012.6	5749.3	7343.64	0	0	31858.4	15306.6	45495.9	50764	49740.6	63245	96887.9	114766	0	0	0	93942.5	0	934.579	0	0	0	2476.52	21547.4	8904.56	91895.5	5675.68	20581.8	42256.8	0	0	0	0	0	0	0	0	0	0	0	0	0	0	0	0	0	0	0
COTU-CM-0154	0	0	0	0	0	0	0	0	0	0	0	0	0	7914.9	0	0	0	0	0	0	0	0	0	0	0	0	0	0	0	0	0	0	0	0	0	0	0	0	0	18258.5	0	0	0	0	0	0	0	13650.5	0
COTU-CM-0155	0	0	0	0	0	0	0	0	0	0	0	0	0	0	0	0	0	0	0	0	0	0	0	0	0	0	0	0	0	0	0	0	7782.25	9055.76	12895.1	25524.6	15839.6	9861.89	16433.9	42603.2	27445.5	63488.9	0	6000	0	0	0	0	0
COTU-CM-0156	0	0	0	0	0	0	0	0	0	0	0	0	0	0	0	0	0	0	0	0	0	0	0	0	0	0	0	0	0	0	0	0	0	4527.88	0	0	0	0	0	0	48029.6	31744.4	0	0	0	0	0	0	0
COTU-CM-0157	0	0	0	0	0	0	0	0	0	0	0	0	0	0	0	0	0	0	0	0	0	0	0	0	0	0	0	0	0	0	0	0	15564.5	4527.88	8596.74	3646.37	0	4930.94	52588.5	6086.17	0	0	0	6000	0	0	0	0	0
COTU-CM-0158	0	0	0	0	0	0	0	0	0	0	0	0	0	0	0	0	0	0	0	0	0	0	0	0	0	0	0	0	0	0	0	0	35020.1	67918.2	64475.5	25524.6	7919.82	19723.8	308958	36517	0	0	0	6000	0	0	0	0	0
COTU-CM-0159	0	0	0	0	0	0	0	0	0	0	0	0	0	0	0	0	0	0	0	0	0	0	0	0	0	0	0	0	0	0	0	0	7782.25	18111.5	17193.5	0	0	9861.89	0	0	0	0	0	0	0	0	0	0	0
COTU-CM-0160	31429.2	38755.3	17247.9	11015.5	129088	0	74336.3	22959.9	15165.3	7809.85	31087.9	4517.5	0	7914.9	44869.8	0	7273.71	25620.7	0	0	10301.5	0	7672.19	2476.52	0	0	7657.96	810.811	3430.3	0	0	0	0	0	0	0	0	0	0	0	0	0	0	0	0	0	0	0	0
COTU-CM-0161	0	0	5749.3	3671.82	0	27148.9	21238.9	7653.31	0	3904.92	18652.7	9035	12111	3957.45	29913.2	0	7273.71	93942.5	0	0	10301.5	0	3836.09	4953.03	0	1272.08	7657.96	0	0	0	0	1970.51	0	0	0	0	0	0	6573.57	0	0	0	0	0	0	0	0	0	0
COTU-CM-0162	94287.6	100764	149482	62421	274312	153844	254867	68879.8	7582.64	7809.85	80828.5	0	224053	110809	867482	142469	0	128103	48197.3	42056.1	144221	24327.8	30688.8	32194.7	0	0	53605.7	0	41163.6	28171.2	56780.7	15764.1	66149.1	76973.9	98862.5	58341.9	55438.7	59171.3	52588.5	76077.1	68613.8	45853.1	8815.79	12000	5309.73	1868.61	0	3900.16	2357.72
COTU-CM-0163	10476.4	46506.3	34495.8	3671.82	48408.1	9049.64	74336.3	45919.8	7582.64	3904.92	24870.3	31622.5	42388.4	3957.45	74783	17096.3	14547.4	0	9639.46	0	0	0	3836.09	2476.52	7182.47	1272.08	15315.9	1621.62	0	2817.12	0	1970.51	11673.4	0	4298.37	3646.37	23759.4	7396.42	13147.1	21301.6	20584.1	0	0	0	0	0	0	3900.16	0
COTU-CM-0164	0	7751.05	0	0	0	0	31858.4	0	0	0	18652.7	0	6055.49	3957.45	0	0	0	0	0	0	0	0	0	0	0	0	0	0	0	0	0	0	23346.8	4527.88	8596.74	36463.7	23759.4	24654.7	6573.57	9129.26	0	14108.6	0	0	0	0	0	7800.31	0
COTU-CM-0165	0	0	0	0	0	0	0	0	0	0	0	0	42388.4	0	0	0	0	0	0	0	0	0	0	0	0	0	0	0	0	0	0	0	0	0	0	0	0	0	0	0	0	0	0	0	0	0	0	0	0
COTU-CM-0168	10476.4	7751.05	5749.3	11015.5	0	9049.64	0	7653.31	0	0	12435.2	4517.5	0	0	119653	56987.8	0	8540.23	0	1869.16	0	0	0	2476.52	0	0	30631.8	1621.62	3430.3	0	92268.7	11823.1	0	0	0	0	0	0	0	0	0	0	0	0	0	0	0	0	0
COTU-CM-0169	429532	372051	57493	51405.5	935889	398184	84955.8	99493	0	0	242486	18070	211942	261192	329045	68385.3	94558.2	384310	38557.9	26168.2	370853	113530	95902.4	34671.2	0	1272.08	222081	1621.62	65175.6	70428	42585.6	55174.3	19455.6	13583.6	30088.6	14585.5	0	2465.47	46015	3043.09	27445.5	7054.32	0	0	0	1868.61	0	0	4715.45
COTU-CM-0170	20952.8	23253.2	11498.6	14687.3	0	9049.64	10619.5	15306.6	0	0	0	0	0	0	14956.6	22795.1	0	0	19278.9	7476.64	0	0	0	2476.52	0	0	0	0	0	2817.12	0	0	73931.4	72446.1	107459	61988.3	0	36982.1	65735.7	0	130366	70543.2	0	0	0	0	1758.53	0	0
COTU-CM-0171	0	0	0	0	0	0	0	0	0	0	12435.2	4517.5	0	0	29913.2	5698.78	0	0	0	6542.06	0	0	0	2476.52	0	0	0	0	0	0	7097.59	0	0	0	0	0	0	0	0	0	0	0	0	0	0	0	0	0	0
COTU-CM-0172	0	0	0	0	0	0	0	0	0	0	0	0	0	0	0	0	0	0	0	0	0	0	0	0	0	0	0	0	0	0	0	0	19455.6	22639.4	21491.8	18231.9	0	0	16433.9	3043.09	61752.4	3527.16	0	0	0	0	0	0	0
COTU-CM-0176	10476.4	0	5749.3	3671.82	16136	18099.3	148673	45919.8	0	0	24870.3	13552.5	0	0	119653	17096.3	0	0	0	0	20602.9	0	23016.6	14859.1	0	0	7657.96	0	0	0	21292.8	3941.02	0	0	0	0	0	0	0	0	0	0	0	0	0	0	0	0	0
COTU-CM-0177	0	0	0	0	129088	0	0	0	0	0	0	0	0	0	0	0	0	0	0	0	0	0	0	0	0	0	0	0	0	0	0	0	0	0	0	0	0	0	0	0	0	0	0	0	0	0	0	0	0
COTU-CM-0178	921923	782856	385203	631553	1.90405e+06	805418	647788	505118	1.02366e+06	339728	1.79066e+06	614380	520772	506554	1.19653e+06	131072	887392	1.92155e+06	1.38808e+06	633645	1.67914e+06	713616	249346	160974	1.22102e+06	340917	1.86854e+06	105405	329308	295797	1.28466e+06	169464	0	0	0	0	0	0	0	0	0	0	0	0	0	0	0	0	0
COTU-CM-0179	0	0	0	0	0	0	0	0	53078.5	0	0	0	0	0	0	0	0	0	0	0	0	0	0	0	0	0	0	0	0	0	0	0	0	0	0	0	0	0	0	0	0	0	0	0	0	0	0	0	0
COTU-CM-0180	0	0	0	0	0	0	0	0	0	0	0	0	0	0	0	0	0	0	0	934.579	0	0	0	0	0	8904.56	0	0	0	0	0	0	0	0	0	0	0	0	0	0	0	0	0	0	0	0	0	0	0
COTU-CM-0183	0	0	0	0	0	0	0	0	0	0	0	0	0	0	0	0	0	0	0	0	0	0	0	0	0	0	0	0	0	0	0	0	0	0	21491.8	0	0	12327.4	262943	127810	0	0	0	0	0	0	0	0	0
COTU-CM-0184	0	0	0	0	0	0	0	0	0	0	0	0	0	43532	0	0	7273.71	0	0	0	0	0	0	0	0	0	0	0	0	0	0	0	1.85996e+06	2.13716e+06	2.39419e+06	1.43667e+06	1.25925e+06	1.22287e+06	1.12737e+06	675565	1.77023e+06	1.71067e+06	0	36000	15929.2	26160.6	63307.1	72152.9	14146.3
COTU-CM-0185	0	0	0	0	0	0	0	0	0	0	0	0	0	0	0	0	0	0	0	0	10301.5	0	0	0	0	7632.48	0	0	0	0	0	0	0	0	0	0	0	0	0	0	0	0	0	0	0	0	0	0	0
COTU-CM-0186	0	0	0	0	0	0	0	0	0	0	0	0	0	0	0	0	0	0	0	0	0	0	0	2476.52	64642.3	0	0	0	0	0	0	0	0	0	0	0	0	0	0	0	0	0	0	0	0	0	0	0	0
COTU-CM-0187	0	0	0	0	0	0	0	0	0	0	0	0	0	0	0	0	0	0	0	0	0	0	0	0	0	0	0	0	0	0	0	0	23346.8	13583.6	42983.7	0	0	12327.4	26294.3	0	54891	3527.16	0	0	0	0	0	0	0
COTU-CM-0188	314292	465063	86239.5	51405.5	322720	153844	392920	283172	401880	164007	167875	117455	175609	138511	792700	91180.5	145474	170805	57836.8	13084.1	195728	105421	153444	131255	244204	52155.3	145501	4864.86	37733.3	33805.4	70975.9	68967.9	0	0	0	0	0	0	0	0	0	0	0	0	0	0	0	0	0
COTU-CM-0189	1.64479e+06	1.76724e+06	707164	455306	2.27518e+06	959262	552212	359705	439793	164007	1.08186e+06	189735	175609	269107	1.30122e+06	216554	894666	1.28957e+06	404858	147664	545978	328426	126591	168403	366306	85229.4	857692	23513.5	96048.3	143673	198733	92614	0	0	0	0	0	0	0	0	0	0	0	0	0	0	0	0	0
COTU-CM-0190	0	0	0	0	0	0	0	0	0	0	0	0	0	0	0	0	0	0	0	0	0	0	0	0	0	0	0	0	0	0	0	0	11673.4	4527.88	12895.1	3646.37	7919.82	0	42728.2	18258.5	178396	52907.4	0	0	15929.2	1868.61	1758.53	0	0
COTU-CM-0191	0	0	0	0	0	0	0	0	0	0	0	0	0	0	0	0	0	0	0	0	0	0	0	0	0	0	0	0	0	0	0	0	0	0	0	0	0	0	0	0	0	0	0	0	0	0	0	0	0
COTU-CM-0192	0	0	0	0	0	0	0	0	0	0	0	0	0	0	0	0	0	0	0	0	0	0	0	0	0	0	0	0	0	0	0	0	27237.9	0	8596.74	14585.5	7919.82	7396.42	3286.78	3043.09	68613.8	35271.6	8815.79	0	5309.73	7474.45	0	1950.08	0
COTU-CM-0193	20952.8	15502.1	5749.3	7343.64	64544.1	0	0	0	22747.9	0	6217.58	0	0	0	0	0	72737.1	128103	173510	120561	236934	105421	30688.8	52006.8	466861	128480	61263.7	810.811	51454.4	50708.1	42585.6	1970.51	73931.4	58862.4	42983.7	21878.2	7919.82	27120.2	26294.3	9129.26	521465	88179	0	12000	31858.4	3737.23	14068.2	17550.7	0
COTU-CM-0194	83811.2	77510.5	74740.9	44061.9	48408.1	45248.2	95575.2	53573.2	22747.9	11714.8	55958.2	0	12111	19787.3	0	0	0	51241.4	28918.4	7476.64	0	16218.5	3836.09	4953.03	28729.9	5088.32	38289.8	810.811	6860.59	2817.12	0	0	19455.6	13583.6	4298.37	3646.37	0	4930.94	6573.57	12172.3	0	3527.16	0	0	0	0	0	0	0
COTU-CM-0195	0	0	0	0	16136	0	0	0	0	0	0	0	36332.9	0	0	0	0	0	0	0	0	0	0	0	0	0	0	0	0	0	0	0	0	0	0	0	0	0	0	0	0	0	0	0	0	0	0	0	0
COTU-CM-0196	20952.8	7751.05	11498.6	0	64544.1	27148.9	42477.9	7653.31	22747.9	66383.7	43523.1	45175	393607	336383	209392	216554	21821.1	8540.23	9639.46	0	10301.5	4054.64	3836.09	4953.03	7182.47	2544.16	7657.96	0	44593.9	76062.2	0	51233.3	42802.4	58862.4	60177.2	145855	102958	110946	59162.1	228231	54891	105815	0	0	0	3737.23	1758.53	5850.23	2357.72
COTU-CM-0197	10476.4	0	0	0	0	0	0	0	0	0	0	0	0	0	0	0	0	0	0	0	0	0	0	0	0	0	0	0	0	0	0	0	0	9055.76	0	0	0	0	0	0	41168.3	0	0	6000	0	1868.61	0	1950.08	2357.72
COTU-CM-0198	0	0	0	0	0	0	0	0	0	0	0	0	0	0	0	0	0	0	0	0	0	0	0	0	0	0	0	0	0	0	0	0	15564.5	13583.6	12895.1	3646.37	7919.82	2465.47	9860.35	0	27445.5	49380.2	0	0	0	0	0	0	0
COTU-CM-0199	0	0	0	0	0	0	0	0	0	0	0	0	0	0	0	0	0	0	0	0	0	0	0	0	0	0	0	0	0	0	0	0	3891.13	4527.88	8596.74	3646.37	0	0	6573.57	0	13722.8	38798.8	0	6000	5309.73	0	0	0	0
COTU-CM-0200	0	0	0	0	0	18099.3	10619.5	30613.2	0	0	0	0	0	0	0	0	0	8540.23	0	0	20602.9	0	0	0	0	0	0	0	0	0	0	0	108952	95085.5	107459	61988.3	71278.3	34516.6	170913	149111	157812	63488.9	8815.79	12000	0	1868.61	3517.06	0	0
COTU-CM-0201	0	15502.1	0	0	0	0	0	22959.9	0	3904.92	391708	117455	0	0	0	0	0	0	0	0	0	0	0	2476.52	0	0	145501	4864.86	0	0	0	0	0	0	0	0	0	0	0	0	0	0	0	0	0	0	0	0	0
COTU-CM-0202	0	0	0	0	0	0	0	0	0	0	0	0	0	0	0	0	0	0	0	0	0	0	0	0	0	0	0	0	0	0	0	0	3891.13	9055.76	0	0	0	0	16433.9	18258.5	6861.38	7054.32	0	0	0	0	0	0	0
COTU-CM-0203	0	0	0	0	0	0	0	0	0	0	0	0	0	0	0	0	0	0	0	0	0	0	0	0	0	0	0	0	0	0	0	0	3891.13	4527.88	4298.37	7292.74	0	2465.47	19720.7	3043.09	0	0	0	0	0	0	0	0	0
COTU-CM-0204	10476.4	7751.05	0	14687.3	0	0	0	15306.6	0	0	24870.3	4517.5	0	0	29913.2	0	0	17080.5	0	0	10301.5	0	0	0	0	0	0	810.811	0	0	0	0	66149.1	27167.3	30088.6	32817.3	15839.6	14792.8	98603.5	45646.3	27445.5	21163	0	6000	0	0	0	0	0
COTU-CM-0205	52382	31004.2	45994.4	66092.8	145224	27148.9	10619.5	53573.2	15165.3	11714.8	49740.6	0	0	27702.2	44869.8	0	14547.4	51241.4	0	9345.79	51507.4	40546.4	7672.19	14859.1	71824.7	11448.7	38289.8	810.811	6860.59	19719.8	21292.8	9852.56	0	0	8596.74	0	0	0	9860.35	15215.4	6861.38	7054.32	0	0	0	0	0	0	2357.72
COTU-CM-0206	83811.2	193776	126485	88123.7	306584	144794	307965	237253	128905	85908.3	124352	27105	121110	55404.3	224349	34192.7	21821.1	102483	28918.4	15887.9	61808.8	20273.2	42197	19812.1	28729.9	19081.2	7657.96	4864.86	17151.5	19719.8	35488	17734.6	15564.5	31695.2	38685.3	10939.1	0	14792.8	6573.57	6086.17	34306.9	14108.6	17631.6	0	5309.73	0	0	0	0
COTU-CM-0207	0	69759.5	0	0	0	0	0	0	0	0	0	0	0	0	0	0	0	0	0	0	0	0	0	0	0	0	0	0	0	0	0	0	0	0	0	0	0	0	0	0	0	0	0	0	0	0	0	0	0
COTU-CM-0208	0	23253.2	57493	25702.8	16136	18099.3	21238.9	114800	22747.9	7809.85	55958.2	45175	36332.9	3957.45	29913.2	34192.7	14547.4	8540.23	9639.46	7476.64	61808.8	12163.9	0	7429.55	50277.3	0	53605.7	810.811	0	28171.2	14195.2	78820.4	3891.13	27167.3	21491.8	10939.1	0	22189.2	13147.1	3043.09	6861.38	28217.3	0	0	0	1868.61	0	1950.08	0
COTU-CM-0209	0	0	0	0	0	0	0	0	0	0	0	0	0	0	0	0	0	0	0	0	0	0	0	0	0	0	0	0	0	0	0	0	27237.9	4527.88	12895.1	7292.74	7919.82	2465.47	36154.6	6086.17	6861.38	3527.16	8815.79	0	0	0	0	0	0
COTU-CM-0210	0	0	0	0	0	18099.3	0	15306.6	0	0	0	0	0	0	0	5698.78	21821.1	0	0	0	0	0	7672.19	2476.52	0	0	0	0	3430.3	0	14195.2	0	233468	176587	189128	131269	197995	118343	443716	124766	349930	299809	17631.6	12000	0	1868.61	5275.59	1950.08	16504.1
COTU-CM-0211	0	0	5749.3	0	48408.1	0	31858.4	0	0	7809.85	6217.58	45175	6055.49	3957.45	29913.2	0	7273.71	0	0	934.579	0	0	3836.09	7429.55	0	0	22973.9	810.811	0	0	7097.59	1970.51	0	0	12895.1	0	0	0	0	0	0	0	0	0	0	0	0	1950.08	0
COTU-CM-0212	0	0	0	0	0	0	0	0	0	0	0	0	0	0	0	0	0	0	0	0	0	0	0	0	0	0	0	0	0	0	0	0	0	0	17193.5	0	0	9861.89	32867.8	3043.09	0	7054.32	0	0	0	0	0	0	0
COTU-CM-0213	62858.4	116266	80490.2	47733.7	129088	81446.7	31858.4	22959.9	7582.64	27334.5	24870.3	27105	84776.9	3957.45	89739.6	11397.6	7273.71	51241.4	28918.4	21495.3	51507.4	12163.9	7672.19	4953.03	0	5088.32	15315.9	0	6860.59	2817.12	28390.4	1970.51	108952	54334.5	64475.5	61988.3	55438.7	17258.3	197207	91292.6	89197.9	59961.7	0	0	0	0	0	0	0
COTU-CM-0214	0	0	0	0	0	0	0	0	0	0	0	0	0	0	0	0	0	0	0	0	0	0	53705.3	0	0	0	0	0	0	0	0	0	0	0	0	0	0	0	0	0	0	0	0	0	0	0	0	0	0
COTU-CM-0215	0	0	0	0	0	0	0	0	0	0	0	0	0	0	0	0	0	0	0	0	0	0	30688.8	0	0	0	0	0	0	0	0	0	0	0	0	0	0	0	0	0	0	0	0	0	0	0	0	0	0
COTU-CM-0216	4.55723e+06	573578	6.72668e+06	429603	5.0183e+06	995460	3.18584e+06	880130	4.08705e+06	124958	8.43726e+06	22587.5	2.45247e+06	985405	3.05115e+06	444505	3.23971e+07	7.29336e+06	6.42278e+07	3.21682e+06	3.46645e+07	1.20869e+07	1.25555e+07	3.74944e+06	2.27828e+07	1.04819e+06	2.46663e+07	55135.1	1.12822e+07	6.35824e+06	1.61115e+07	2.56166e+06	0	0	0	0	0	0	0	0	0	0	0	0	0	0	0	0	0
COTU-CM-0217	83811.2	85261.6	34495.8	29374.6	242040	54297.8	74336.3	15306.6	121322	42954.2	93263.7	126490	54499.4	31659.6	284175	17096.3	43642.2	213506	125313	18691.6	185427	52710.3	0	27241.7	57459.8	43250.7	122527	0	24012.1	28171.2	78073.5	29557.7	0	0	0	0	0	0	0	0	0	0	0	0	0	0	0	0	0
COTU-CM-0218	20952.8	23253.2	45994.4	14687.3	48408.1	27148.9	10619.5	22959.9	22747.9	11714.8	37305.5	40657.5	24222	7914.9	44869.8	5698.78	14547.4	111023	67476.3	11215	61808.8	12163.9	11508.3	12382.6	57459.8	8904.56	7657.96	3243.24	10290.9	19719.8	35488	7882.04	0	0	0	0	0	0	0	0	0	0	0	0	0	0	0	0	0
COTU-CM-0219	1.20374e+07	1.48975e+07	1.11996e+07	7.31427e+06	2.26872e+07	7.64694e+06	1.04071e+07	1.28499e+07	9.75886e+06	4.72496e+06	1.27274e+07	5.39841e+06	1.02943e+07	9.03486e+06	2.33024e+07	6.59919e+06	4.10237e+06	1.48002e+07	7.1814e+06	2.89159e+06	8.26178e+06	3.21127e+06	2.51264e+06	2.46166e+06	6.61506e+06	2.40042e+06	5.27634e+06	614595	3.41658e+06	3.27631e+06	5.43676e+06	2.16165e+06	0	0	0	0	0	0	0	0	0	0	0	0	0	0	0	0	0
COTU-CM-0220	0	0	0	0	0	0	0	0	0	0	0	0	42388.4	0	0	0	0	0	0	0	0	0	0	0	0	0	0	0	0	0	0	0	0	0	0	0	0	0	0	0	0	0	0	0	0	0	0	0	0
COTU-CM-0221	0	7751.05	5749.3	3671.82	16136	0	0	7653.31	7582.64	3904.92	0	0	0	3957.45	0	0	0	0	0	1869.16	0	0	0	24765.2	0	0	0	0	17151.5	0	0	0	0	0	0	0	0	0	0	0	0	0	0	0	0	0	0	0	0
COTU-CM-0222	0	0	0	0	0	0	0	0	0	0	37305.5	0	0	0	0	0	0	0	0	0	0	0	0	0	0	0	0	0	0	0	0	0	0	0	0	0	0	0	0	0	0	0	0	0	0	0	0	0	0
COTU-CM-0223	0	0	0	0	0	0	0	0	0	0	0	0	0	0	0	0	0	0	0	934.579	0	0	0	0	0	0	0	0	0	0	0	0	443588	543345	429837	218782	118797	155325	726379	103465	425405	130505	17631.6	24000	21238.9	1868.61	5275.59	9750.39	9430.89
COTU-CM-0224	52382	46506.3	57493	88123.7	16136	9049.64	201770	183679	7582.64	0	167875	58727.5	42388.4	31659.6	0	0	29094.8	136644	163871	100000	103015	32437.1	107411	59436.4	0	1272.08	359924	13783.8	68605.9	76062.2	0	0	163427	172059	227814	120330	102958	88757	890718	246490	981177	571400	0	48000	0	0	0	0	4715.45
COTU-CM-0225	0	0	0	0	32272	0	0	0	15165.3	0	0	4517.5	0	3957.45	29913.2	5698.78	0	0	0	0	20602.9	12163.9	0	0	0	8904.56	0	0	0	0	0	3941.02	0	0	0	0	0	0	0	0	0	0	0	0	0	0	0	0	0
COTU-CM-0226	0	0	0	0	0	0	0	0	0	0	0	0	0	0	0	0	0	0	0	0	0	0	0	0	0	0	0	0	0	0	0	0	27237.9	18111.5	38685.3	43756.4	71278.3	19723.8	0	30430.9	20584.1	84651.8	0	0	0	0	0	0	0
COTU-CM-0227	0	0	0	0	0	0	0	0	0	0	0	0	0	0	0	0	0	0	0	0	0	0	0	0	0	0	0	0	0	0	0	0	19455.6	27167.3	42983.7	18231.9	47518.9	46844	0	18258.5	6861.38	10581.5	0	0	0	0	0	0	0
COTU-CM-0228	62858.4	23253.2	80490.2	84451.9	0	0	74336.3	137760	7582.64	11714.8	49740.6	67762.5	48443.9	39574.5	29913.2	0	0	25620.7	0	5607.48	0	0	3836.09	2476.52	0	1272.08	15315.9	0	0	0	7097.59	1970.51	31129	36223	47282.1	43756.4	31679.3	34516.6	9860.35	42603.2	27445.5	35271.6	0	0	0	0	0	0	7073.17
COTU-CM-0229	0	0	5749.3	3671.82	16136	0	0	15306.6	0	3904.92	37305.5	13552.5	36332.9	0	0	5698.78	0	0	0	0	0	4054.64	0	0	0	0	0	0	0	0	0	0	27237.9	4527.88	17193.5	32817.3	7919.82	7396.42	3286.78	0	0	7054.32	0	0	0	0	0	0	0
COTU-CM-0230	0	0	0	0	0	0	0	0	0	0	0	0	0	0	0	0	0	0	0	0	0	0	0	0	0	0	0	0	0	0	0	0	15564.5	9055.76	12895.1	7292.74	7919.82	7396.42	16433.9	30430.9	20584.1	67016	0	0	5309.73	0	0	0	0
COTU-CM-0231	0	0	0	0	0	0	0	0	0	0	0	0	0	0	0	0	0	0	0	0	0	0	0	0	0	0	0	0	0	0	0	0	15564.5	9055.76	17193.5	18231.9	31679.3	19723.8	0	12172.3	0	17635.8	8815.79	6000	0	0	0	0	0
COTU-CM-0232	52382	162772	51743.7	14687.3	0	18099.3	63716.8	68879.8	22747.9	11714.8	205180	121972	12111	7914.9	29913.2	62686.6	0	25620.7	9639.46	3738.32	0	0	0	0	0	2544.16	15315.9	0	0	0	0	3941.02	0	0	0	0	0	0	0	0	0	0	0	0	0	0	0	0	0
COTU-CM-0233	62858.4	240283	132234	69764.6	32272	9049.64	106195	229599	106157	35144.3	62175.8	22587.5	48443.9	51446.9	29913.2	34192.7	7273.71	17080.5	19278.9	4672.9	0	0	0	14859.1	14364.9	5088.32	22973.9	3243.24	0	0	7097.59	15764.1	19455.6	9055.76	30088.6	25524.6	15839.6	9861.89	75596	97378.7	41168.3	63488.9	0	6000	0	0	0	0	0
COTU-CM-0234	0	0	0	0	0	0	0	0	0	0	0	0	0	0	0	0	0	0	0	0	0	0	0	0	0	0	0	0	0	0	0	0	3891.13	4527.88	8596.74	18231.9	7919.82	4930.94	0	9129.26	34306.9	49380.2	0	0	0	0	0	0	2357.72
COTU-CM-0235	10476.4	0	0	0	0	0	0	0	0	0	0	0	42388.4	43532	14956.6	5698.78	0	0	0	0	0	0	0	0	0	0	0	0	27442.4	2817.12	0	1970.51	0	0	0	0	0	0	0	0	0	0	0	0	0	0	0	0	0
COTU-CM-0236	0	38755.3	91988.8	51405.5	0	9049.64	74336.3	68879.8	0	0	136787	27105	0	0	14956.6	0	7273.71	8540.23	9639.46	6542.06	0	4054.64	7672.19	12382.6	0	0	68921.7	10540.5	0	0	0	0	19455.6	4527.88	17193.5	14585.5	7919.82	7396.42	3286.78	6086.17	6861.38	10581.5	0	0	0	0	0	0	0
COTU-CM-0237	0	0	0	0	0	0	0	0	0	0	0	0	0	0	0	0	0	0	0	0	0	0	0	0	0	0	0	0	0	0	0	0	0	0	0	0	0	0	0	0	0	24690.1	0	0	0	0	0	0	0
COTU-CM-0238	0	15502.1	103487	29374.6	16136	27148.9	0	7653.31	15165.3	3904.92	31087.9	9035	36332.9	87063.9	0	0	7273.71	8540.23	28918.4	24299.1	0	4054.64	0	0	0	0	7657.96	4864.86	10290.9	8451.35	0	0	7782.25	4527.88	4298.37	7292.74	0	4930.94	0	0	6861.38	21163	0	0	0	0	0	0	2357.72
COTU-CM-0241	0	0	0	0	0	0	0	0	0	0	0	0	0	0	0	0	0	0	0	0	0	0	0	0	0	0	0	0	0	0	0	0	38911.3	45278.8	34387	40110.1	31679.3	24654.7	6573.57	30430.9	27445.5	59961.7	0	0	0	1868.61	0	0	0
COTU-CM-0242	10476.4	0	0	0	0	0	0	0	0	0	12435.2	9035	0	0	0	0	0	0	0	0	0	0	0	0	0	0	0	0	0	0	0	1970.51	19455.6	18111.5	8596.74	10939.1	15839.6	2465.47	32867.8	12172.3	27445.5	21163	0	0	0	0	0	0	0
COTU-CM-0243	0	0	0	0	0	0	0	0	0	0	0	0	0	0	0	0	0	59781.6	0	5607.48	0	0	0	17335.6	71824.7	0	45947.8	5675.68	0	0	0	0	0	0	0	0	0	0	0	0	0	0	0	0	0	0	0	0	0
COTU-CM-0244	0	0	0	0	0	0	0	0	0	0	0	0	108999	0	0	0	0	0	0	0	0	0	0	0	0	0	0	0	0	0	0	0	0	0	0	0	0	0	0	0	0	0	0	0	0	0	0	0	0
COTU-CM-0245	0	0	0	0	0	0	0	0	0	0	0	0	0	0	0	0	0	0	0	0	0	0	0	0	0	0	0	0	0	0	0	0	15564.5	9055.76	8596.74	29171	31679.3	4930.94	6573.57	3043.09	34306.9	21163	0	0	0	0	0	0	0
COTU-CM-0246	0	0	0	0	0	0	0	0	0	0	0	0	0	0	0	0	0	0	0	0	0	0	0	0	0	0	0	0	0	0	0	0	19455.6	13583.6	12895.1	7292.74	7919.82	4930.94	46015	45646.3	109782	59961.7	0	6000	0	1868.61	0	1950.08	2357.72
COTU-CM-0247	31429.2	7751.05	63242.3	3671.82	64544.1	9049.64	74336.3	30613.2	30330.6	3904.92	99481.3	0	78721.4	23744.7	164523	34192.7	29094.8	25620.7	67476.3	3738.32	72110.3	4054.64	38360.9	0	7182.47	3816.24	114869	4054.05	30872.7	16902.7	0	0	0	0	4298.37	0	0	2465.47	0	0	0	0	0	0	5309.73	0	0	5850.23	2357.72
COTU-CM-0248	0	0	0	0	0	0	0	0	0	0	0	0	0	0	0	0	0	0	0	0	0	0	0	0	0	0	0	0	0	0	0	0	54475.8	63390.3	68773.9	14585.5	39599.1	12327.4	16433.9	9129.26	75475.1	28217.3	8815.79	0	0	0	3517.06	0	2357.72
COTU-CM-0249	293339	348797	74740.9	66092.8	48408.1	36198.5	148673	130106	53078.5	35144.3	80828.5	9035	108999	87063.9	344002	62686.6	116379	324529	19278.9	20560.7	113316	16218.5	76721.9	86678.1	150832	10176.6	22973.9	810.811	41163.6	47891	291001	45321.8	171210	108669	137548	83866.5	71278.3	78895.1	92029.9	12172.3	89197.9	151668	8815.79	0	42477.9	5605.84	3517.06	9750.39	0
COTU-CM-0250	167622	178274	252969	121170	322720	72397.1	106195	68879.8	53078.5	7809.85	93263.7	13552.5	84776.9	75191.6	239306	74084.1	36368.5	170805	77115.7	41121.5	257537	125694	15344.4	34671.2	7182.47	6360.4	53605.7	4054.05	20581.8	11268.5	106464	27587.2	27237.9	27167.3	4298.37	7292.74	23759.4	4930.94	3286.78	3043.09	0	7054.32	8815.79	0	0	0	1758.53	0	0
COTU-CM-0251	0	0	0	0	0	0	0	0	0	0	0	0	0	0	0	0	0	0	0	0	0	0	0	0	0	0	0	0	0	0	0	0	54475.8	40750.9	25790.2	7292.74	23759.4	14792.8	0	3043.09	41168.3	7054.32	8815.79	6000	0	0	1758.53	0	0
COTU-CM-0252	0	0	0	0	0	0	0	0	0	0	0	0	0	0	0	0	0	0	0	0	0	0	0	0	0	0	0	0	0	0	0	0	0	0	0	0	0	0	13147.1	0	20584.1	42325.9	0	0	0	0	0	0	0
COTU-CM-0253	0	0	11498.6	7343.64	0	9049.64	21238.9	30613.2	0	3904.92	0	4517.5	0	7914.9	14956.6	17096.3	0	0	0	934.579	0	0	3836.09	0	14364.9	1272.08	0	0	0	0	0	0	171210	226394	124653	76573.8	134637	61636.8	220214	79120.2	102921	141086	0	6000	5309.73	3737.23	1758.53	1950.08	2357.72
COTU-CM-0254	104764	38755.3	868144	220309	322720	54297.8	169912	68879.8	0	0	292226	4517.5	115054	19787.3	119653	11397.6	65463.4	102483	472334	101869	1.08165e+06	478447	42197	71819	0	0	306318	810.811	168085	112685	319392	41380.7	0	4527.88	0	3646.37	0	0	0	0	61752.4	77597.5	0	0	0	0	0	0	0
COTU-CM-0255	0	0	0	0	0	0	0	0	90991.7	7809.85	0	0	0	0	0	0	0	0	0	0	0	0	0	0	35912.4	6360.4	0	0	0	0	0	0	0	0	0	0	0	0	0	0	0	0	0	0	0	0	0	0	0
COTU-CM-0256	0	0	0	0	0	0	0	0	0	0	0	0	0	0	44869.8	17096.3	0	0	0	0	10301.5	4054.64	0	0	7182.47	0	0	0	0	0	14195.2	17734.6	3891.13	13583.6	0	0	0	0	0	0	13722.8	21163	0	0	5309.73	0	0	1950.08	0
COTU-CM-0257	31429.2	23253.2	17247.9	0	96816.1	18099.3	63716.8	153066	37913.2	15619.7	111916	4517.5	18166.5	47489.4	119653	17096.3	21821.1	34160.9	0	3738.32	41205.9	16218.5	23016.6	39624.3	57459.8	6360.4	38289.8	0	3430.3	16902.7	49683.1	3941.02	19455.6	13583.6	17193.5	7292.74	23759.4	4930.94	23007.5	12172.3	6861.38	21163	0	0	5309.73	1868.61	1758.53	0	0
COTU-CM-0258	52382	23253.2	22997.2	3671.82	177496	45248.2	53097.3	68879.8	136488	11714.8	143004	0	42388.4	23744.7	134609	11397.6	43642.2	93942.5	9639.46	4672.9	370853	182459	15344.4	54483.3	107737	8904.56	206765	2432.43	48024.1	33805.4	141952	7882.04	0	18111.5	8596.74	0	0	0	52588.5	9129.26	6861.38	3527.16	0	0	0	0	0	0	0
COTU-CM-0259	10476.4	7751.05	17247.9	0	32272	18099.3	10619.5	22959.9	30330.6	7809.85	18652.7	4517.5	12111	11872.4	0	5698.78	0	0	0	934.579	51507.4	4054.64	0	2476.52	7182.47	1272.08	0	810.811	3430.3	11268.5	0	1970.51	19455.6	40750.9	25790.2	18231.9	7919.82	0	3286.78	3043.09	41168.3	38798.8	8815.79	6000	0	1868.61	0	0	0
COTU-CM-0260	0	0	0	0	0	0	0	91839.7	0	0	0	4517.5	0	0	0	0	0	0	0	0	0	0	0	0	0	0	0	0	0	0	0	0	0	0	0	0	0	0	0	0	0	0	0	0	0	0	0	0	0
COTU-CM-0261	240957	395304	235721	176247	855209	542978	456637	244906	0	0	292226	216840	78721.4	83106.5	299132	113976	58189.7	213506	9639.46	49532.7	175125	125694	57541.4	44577.3	0	0	45947.8	42162.2	6860.59	5634.24	35488	13793.6	3891.13	0	0	0	0	0	26294.3	24344.7	34306.9	31744.4	0	0	0	0	0	7800.31	2357.72
COTU-CM-0262	0	0	0	0	0	0	0	0	0	0	0	0	0	0	0	0	0	0	0	0	0	0	0	0	0	0	0	0	0	0	0	0	62258	13583.6	25790.2	61988.3	95037.8	41913	75596	9129.26	13722.8	24690.1	0	0	0	0	0	0	0
COTU-CM-0263	0	0	0	0	0	0	0	0	0	0	0	0	0	0	0	0	0	0	0	0	0	0	0	0	0	0	0	0	0	0	0	0	31129	22639.4	25790.2	25524.6	7919.82	14792.8	0	0	0	3527.16	17631.6	0	5309.73	0	3517.06	0	0
COTU-CM-0264	0	0	0	0	0	0	0	0	0	0	0	0	0	0	0	0	0	0	0	0	0	0	0	0	0	0	0	0	0	0	0	0	38911.3	9055.76	4298.37	10939.1	15839.6	4930.94	36154.6	12172.3	6861.38	21163	8815.79	0	0	0	0	0	0
COTU-CM-0265	0	0	0	0	0	0	0	0	0	0	0	0	0	0	0	0	0	0	0	0	0	0	0	0	0	0	0	0	0	0	0	0	27237.9	22639.4	25790.2	14585.5	23759.4	14792.8	9860.35	6086.17	0	0	0	18000	5309.73	7474.45	14068.2	7800.31	0
COTU-CM-0266	0	0	0	0	0	0	0	0	0	0	0	0	0	0	0	0	0	0	0	0	0	0	0	0	0	0	0	0	0	0	0	0	7782.25	0	0	0	0	0	0	0	41168.3	10581.5	0	0	0	0	0	0	0
COTU-CM-0267	0	0	0	0	0	0	0	0	0	0	0	0	0	0	0	0	0	0	0	0	0	0	0	0	0	0	0	0	0	0	0	0	46693.5	31695.2	64475.5	21878.2	15839.6	4930.94	42728.2	27387.8	137228	52907.4	0	0	0	3737.23	7034.12	1950.08	2357.72
COTU-CM-0268	0	0	0	0	0	0	0	0	0	0	0	0	0	0	0	0	0	0	0	0	0	0	0	0	0	0	0	0	0	0	0	0	0	0	0	0	0	0	0	0	68613.8	49380.2	0	0	0	0	0	0	0
COTU-CM-0269	0	0	0	0	0	0	0	0	0	0	0	0	0	0	0	0	0	0	0	0	0	0	0	0	0	0	0	0	0	0	0	0	0	0	4298.37	3646.37	0	0	36154.6	15215.4	0	0	8815.79	0	0	0	0	0	0
COTU-CM-0270	0	0	0	0	0	9049.64	10619.5	0	0	0	0	0	0	0	0	0	0	0	0	0	0	0	0	0	0	0	0	0	0	0	0	0	0	0	0	0	0	0	0	3043.09	13722.8	0	0	0	0	0	0	0	0
COTU-CM-0271	0	0	0	0	0	0	0	0	0	0	0	0	0	0	0	0	0	0	0	0	0	0	0	0	0	12720.8	0	0	0	0	0	0	0	0	0	0	0	0	0	0	0	0	0	0	0	0	0	0	0
COTU-CM-0272	0	0	0	0	0	0	0	0	0	0	0	0	0	0	0	0	0	0	0	0	0	0	0	0	0	0	0	0	0	0	0	0	0	0	0	0	0	0	3286.78	3043.09	0	3527.16	0	0	0	0	0	0	0
COTU-CM-0273	0	7751.05	0	0	0	0	10619.5	45919.8	22747.9	0	62175.8	27105	0	0	0	0	0	0	0	0	0	0	34524.8	12382.6	0	0	7657.96	13783.8	0	0	0	0	11673.4	0	0	3646.37	0	4930.94	0	6086.17	41168.3	0	8815.79	0	0	0	0	0	0
COTU-CM-0274	0	0	0	0	0	0	0	0	0	0	0	0	0	0	0	0	0	0	0	0	0	0	0	0	0	0	0	0	0	0	0	0	159536	131308	128951	94805.6	110877	69033.2	197207	115637	377376	141086	0	36000	37168.1	37372.3	36929.1	31201.2	0
COTU-CM-0275	0	0	0	0	0	0	0	0	0	0	0	0	0	0	0	0	0	0	0	0	0	0	0	0	0	0	0	0	0	0	0	0	19455.6	13583.6	17193.5	7292.74	0	0	26294.3	3043.09	0	0	0	0	5309.73	0	3517.06	0	0
COTU-CM-0276	0	0	0	0	0	0	0	0	0	0	0	0	0	0	0	0	0	0	0	0	0	0	0	0	0	0	0	0	0	0	0	0	0	0	0	0	0	0	0	0	0	0	0	0	31858.4	0	0	0	0
COTU-CM-0277	0	0	0	0	0	0	0	0	0	0	0	0	0	0	0	0	0	0	0	0	0	0	0	0	0	0	0	0	0	0	0	0	11673.4	18111.5	4298.37	0	0	0	3286.78	9129.26	27445.5	10581.5	0	0	5309.73	3737.23	7034.12	3900.16	0
COTU-CM-0278	0	0	0	0	0	0	0	0	0	0	0	0	0	0	0	0	0	0	0	0	0	0	0	0	0	0	0	0	0	0	0	0	0	4527.88	0	0	0	0	3286.78	0	13722.8	17635.8	0	0	0	0	0	1950.08	0
COTU-CM-0279	20952.8	7751.05	0	0	0	0	0	0	0	0	0	0	0	0	0	0	21821.1	0	0	0	0	0	0	0	0	0	0	0	0	0	0	0	11673.4	22639.4	47282.1	14585.5	15839.6	12327.4	3286.78	0	13722.8	10581.5	0	0	5309.73	3737.23	1758.53	5850.23	0
COTU-CM-0280	0	0	0	0	0	0	0	0	0	0	0	0	0	0	0	0	0	0	0	0	0	0	0	0	0	0	0	0	0	0	0	0	35020.1	9055.76	21491.8	14585.5	15839.6	29585.7	0	12172.3	27445.5	14108.6	0	24000	10619.5	5605.84	5275.59	3900.16	0
COTU-CM-0281	0	0	0	0	0	0	0	0	0	0	0	0	0	0	0	0	0	0	0	0	0	0	0	0	0	0	0	0	0	0	0	0	0	0	0	0	0	0	0	0	13722.8	31744.4	0	0	0	0	0	0	0
COTU-CM-0282	0	0	0	0	0	0	42477.9	61226.5	0	0	6217.58	0	0	0	0	0	0	0	0	0	0	0	7672.19	24765.2	0	0	7657.96	0	0	0	0	0	0	0	0	0	0	0	0	0	0	0	0	0	0	0	0	0	0
COTU-CM-0283	0	0	0	0	0	0	0	0	0	0	0	0	0	0	0	0	0	0	0	0	0	0	0	0	0	0	0	0	0	0	0	0	0	27167.3	0	0	0	0	0	0	0	0	0	0	0	0	0	0	0
COTU-CM-0284	0	0	0	0	0	0	0	0	0	0	0	0	0	0	0	0	0	0	0	0	0	0	0	0	0	0	0	0	0	0	0	0	0	31695.2	0	0	0	0	0	0	0	0	0	0	0	0	0	0	0
COTU-CM-0285	0	0	0	0	0	0	0	0	0	0	0	0	0	0	0	0	0	0	0	0	0	0	0	0	0	0	0	0	0	0	0	0	7782.25	9055.76	0	0	0	4930.94	72309.2	30430.9	27445.5	10581.5	0	6000	0	1868.61	3517.06	0	7073.17
COTU-CM-0286	0	0	0	0	0	0	0	0	0	0	0	0	0	0	0	0	0	0	0	0	0	0	0	0	0	0	0	0	0	0	0	0	140081	122253	81669	91159.3	63358.5	73964.2	19720.7	3043.09	54891	28217.3	0	0	5309.73	0	0	0	0
COTU-CM-0287	0	0	0	0	0	0	0	0	0	0	0	0	0	0	0	0	0	0	0	0	0	0	0	0	0	0	0	0	0	0	0	0	50584.6	36223	17193.5	25524.6	15839.6	17258.3	23007.5	3043.09	27445.5	28217.3	0	0	0	1868.61	1758.53	3900.16	0
COTU-CM-0288	0	0	0	0	0	0	0	0	0	0	0	0	0	0	0	0	0	0	0	0	0	0	0	0	0	0	0	0	0	0	0	0	19455.6	36223	17193.5	14585.5	15839.6	9861.89	0	0	0	0	0	6000	0	7474.45	14068.2	3900.16	0
COTU-CM-0289	0	0	0	0	0	0	0	0	0	0	0	0	0	0	0	0	0	0	0	0	0	0	0	0	0	0	0	0	0	0	0	0	93387	90557.6	68773.9	51049.2	15839.6	9861.89	46015	12172.3	20584.1	24690.1	8815.79	24000	21238.9	5605.84	29895	9750.39	0
COTU-CM-0290	0	0	0	0	0	0	0	0	0	0	0	0	0	0	0	0	0	0	0	0	0	0	0	0	0	0	0	0	0	0	0	0	31129	49806.7	77370.7	18231.9	7919.82	19723.8	16433.9	0	96059.3	52907.4	0	18000	0	3737.23	3517.06	1950.08	0
COTU-CM-0291	0	0	0	0	0	0	0	0	0	0	0	0	0	0	0	0	0	0	0	0	0	0	0	0	0	0	0	0	0	0	0	0	140081	172059	189128	65634.7	31679.3	39447.6	72309.2	30430.9	102921	38798.8	44078.9	96000	0	31766.4	10551.2	33151.3	4715.45
COTU-CM-0292	0	0	0	0	0	0	0	0	0	0	0	0	0	0	0	0	0	0	0	0	0	0	0	0	0	0	0	0	0	0	0	0	0	0	0	0	0	0	39441.4	6086.17	0	0	0	0	0	0	0	0	0
COTU-CM-0293	0	0	0	0	0	0	0	0	0	0	0	0	0	0	0	0	0	0	0	0	0	0	0	0	0	0	0	0	0	0	0	0	0	0	0	0	0	0	0	0	0	0	0	0	0	20554.7	0	0	0
COTU-CM-0294	0	0	0	0	0	0	0	0	0	0	0	0	0	0	0	0	0	0	0	0	0	0	0	0	0	0	0	0	0	0	0	0	19455.6	58862.4	17193.5	7292.74	7919.82	9861.89	26294.3	36517	48029.6	10581.5	17631.6	12000	5309.73	11211.7	3517.06	3900.16	7073.17
COTU-CM-0295	0	0	0	0	0	0	0	0	0	0	0	0	0	0	0	0	0	0	0	0	0	0	0	0	0	0	0	0	0	0	0	0	735423	842185	700634	320881	213835	256409	0	0	1.2076e+06	455004	88157.9	48000	74336.3	46715.3	38687.7	40951.6	0
COTU-CM-0296	0	0	0	0	0	0	0	0	0	0	0	0	0	0	0	0	0	0	0	0	0	0	0	0	0	0	0	0	0	0	0	0	31129	27167.3	25790.2	14585.5	7919.82	4930.94	0	0	6861.38	0	0	0	0	0	1758.53	3900.16	0
COTU-CM-0297	0	0	0	0	0	0	0	0	0	0	0	0	0	3957.45	0	0	0	0	0	0	0	0	0	0	0	0	0	0	0	0	0	0	15564.5	36223	17193.5	14585.5	0	22189.2	6573.57	0	0	0	0	0	0	7474.45	5275.59	11700.5	0
COTU-CM-0298	0	0	0	0	0	0	0	0	0	0	0	0	0	0	0	0	0	0	0	0	0	0	0	0	0	0	0	0	0	0	0	0	11673.4	0	8596.74	3646.37	7919.82	2465.47	23007.5	12172.3	672415	356243	0	0	0	0	0	0	2357.72
COTU-CM-0299	0	0	0	0	0	0	0	7653.31	0	0	0	0	0	0	0	0	0	0	0	0	0	0	0	0	0	0	0	0	0	0	0	0	11673.4	40750.9	21491.8	7292.74	7919.82	4930.94	3286.78	0	0	0	17631.6	0	0	0	0	0	0
COTU-CM-0300	0	0	0	0	0	0	0	0	0	0	0	0	0	0	0	0	0	0	0	0	0	0	0	0	0	0	0	0	0	0	0	0	11673.4	31695.2	21491.8	3646.37	15839.6	14792.8	6573.57	6086.17	0	0	0	0	0	0	0	0	0
COTU-CM-0301	0	0	0	0	0	0	0	0	0	0	0	0	0	0	0	0	0	0	0	0	0	0	0	0	0	0	0	0	0	0	0	0	35020.1	58862.4	47282.1	18231.9	23759.4	12327.4	3286.78	9129.26	96059.3	42325.9	0	0	5309.73	5605.84	0	3900.16	0
COTU-CM-0302	0	0	0	0	0	0	0	0	0	0	0	0	0	0	0	0	0	0	0	0	0	0	0	0	0	0	0	0	0	0	0	0	7782.25	4527.88	4298.37	0	0	0	3286.78	3043.09	75475.1	38798.8	0	0	0	1868.61	0	0	9430.89
COTU-CM-0303	0	0	0	0	0	0	0	0	0	0	0	0	0	0	0	0	0	0	0	0	0	0	0	0	0	0	0	0	0	0	0	0	27237.9	31695.2	38685.3	21878.2	7919.82	17258.3	23007.5	9129.26	109782	17635.8	0	0	5309.73	1868.61	3517.06	0	0
COTU-CM-0304	0	0	0	0	0	0	0	0	0	0	0	0	0	0	0	0	0	0	0	0	0	0	0	0	0	0	0	0	0	0	0	0	7782.25	9055.76	12895.1	0	0	12327.4	3286.78	0	20584.1	3527.16	0	0	0	0	1758.53	3900.16	0
COTU-CM-0305	0	0	0	0	0	0	0	0	0	0	0	0	0	0	0	0	0	0	0	0	0	0	0	0	0	0	0	0	0	0	0	0	3891.13	13583.6	4298.37	3646.37	0	2465.47	39441.4	12172.3	41168.3	35271.6	0	0	0	1868.61	0	1950.08	2357.72
COTU-CM-0306	0	0	0	0	0	0	0	0	0	0	0	0	0	0	0	0	0	0	0	0	0	0	0	0	0	0	0	0	0	0	0	0	11673.4	0	4298.37	0	0	0	19720.7	3043.09	13722.8	0	8815.79	6000	5309.73	0	0	1950.08	4715.45
COTU-CM-0307	0	0	0	0	0	0	0	0	0	0	0	0	0	0	0	0	0	0	0	0	0	0	0	0	0	0	0	0	0	0	0	0	3891.13	4527.88	0	3646.37	7919.82	0	42728.2	3043.09	68613.8	7054.32	0	0	0	0	17585.3	0	0
COTU-CM-0308	0	0	0	0	0	0	0	0	0	0	0	0	0	0	0	0	0	0	0	0	0	0	0	0	0	0	0	0	0	0	0	0	221794	312424	296588	120330	95037.8	106015	3286.78	0	0	7054.32	8815.79	0	10619.5	7474.45	0	0	0
COTU-CM-0309	0	0	0	0	0	0	0	0	0	0	0	0	0	0	0	0	0	0	0	0	0	0	0	0	0	0	0	0	0	0	0	0	3891.13	4527.88	4298.37	0	0	2465.47	0	3043.09	20584.1	28217.3	0	0	0	3737.23	0	1950.08	0
COTU-CM-0310	0	0	0	0	0	0	0	0	0	0	0	0	0	0	0	0	0	0	0	0	0	0	0	0	0	0	0	0	0	0	0	0	3891.13	9055.76	8596.74	0	0	2465.47	46015	48689.4	226425	158722	0	0	0	1868.61	0	0	16504.1
COTU-CM-0311	0	0	0	0	0	0	0	0	0	0	0	0	0	0	0	0	0	0	0	0	0	0	0	0	0	0	0	0	0	0	0	0	124516	58862.4	111758	54695.6	39599.1	29585.7	32867.8	21301.6	48029.6	31744.4	0	0	0	0	1758.53	0	2357.72
COTU-CM-0312	0	0	0	0	0	0	0	0	0	0	0	0	0	0	0	0	0	0	0	0	0	0	0	0	0	0	0	0	0	0	0	0	147863	140364	98862.5	83866.5	102958	93687.9	55875.3	9129.26	123505	91706.2	8815.79	0	0	3737.23	0	3900.16	0
COTU-CM-0313	0	0	0	0	0	0	0	0	0	0	0	0	0	0	0	0	0	8540.23	0	0	0	0	0	2476.52	0	0	0	0	0	0	0	0	3891.13	13583.6	0	3646.37	7919.82	0	32867.8	0	13722.8	3527.16	0	0	0	0	0	0	0
COTU-CM-0314	0	0	0	0	0	0	0	0	0	0	0	0	0	0	0	0	0	0	0	0	0	0	0	0	0	0	0	0	0	0	0	0	7782.25	4527.88	0	0	7919.82	2465.47	19720.7	3043.09	6861.38	7054.32	0	0	0	0	0	5850.23	0
COTU-CM-0315	0	0	0	0	0	0	0	0	0	0	0	0	0	0	0	0	0	0	0	0	0	0	0	0	0	0	0	0	0	0	0	0	3891.13	0	4298.37	21878.2	15839.6	2465.47	6573.57	12172.3	6861.38	14108.6	0	0	0	0	0	0	0
COTU-CM-0316	0	0	0	0	0	0	0	0	0	0	0	0	0	0	0	0	0	0	0	0	0	0	0	0	0	0	0	0	0	0	0	0	3891.13	13583.6	12895.1	14585.5	0	2465.47	9860.35	21301.6	48029.6	17635.8	0	0	0	0	1758.53	0	0
COTU-CM-0317	0	0	0	0	0	0	0	0	0	0	0	0	0	0	0	0	0	0	0	0	0	0	0	0	0	0	0	0	0	0	0	0	23346.8	18111.5	30088.6	21878.2	39599.1	14792.8	6573.57	3043.09	96059.3	112869	0	0	0	0	0	0	0
COTU-CM-0320	0	0	0	0	0	0	0	0	0	0	0	0	0	0	0	0	0	0	0	6542.06	0	0	0	0	0	0	0	0	0	0	0	0	0	0	0	0	0	0	0	0	0	0	0	0	0	0	0	0	0
COTU-CM-0321	240957	217029	390952	326792	1.19407e+06	705872	700885	1.19392e+06	1.07674e+06	558404	1.41761e+06	1.23328e+06	1.16871e+06	696511	628177	153867	130927	367230	154231	139252	391456	194623	203313	252605	1.19229e+06	324380	934271	124054	408205	276078	212928	80791	27237.9	31695.2	25790.2	21878.2	0	14792.8	0	0	61752.4	63488.9	0	0	0	5605.84	1758.53	0	0
COTU-CM-0322	0	0	0	0	0	0	0	7653.31	0	0	0	0	0	0	0	0	0	0	0	0	0	0	0	0	0	7632.48	0	0	0	0	0	0	0	0	0	0	0	0	0	0	0	0	0	0	0	0	0	0	0
COTU-CM-0323	94287.6	31004.2	91988.8	91795.5	338856	99546	148673	329092	189566	101528	279791	280085	169554	174128	74783	28493.9	29094.8	93942.5	28918.4	40186.9	92713.3	68928.8	57541.4	44577.3	387854	63604	183791	25135.1	126921	56342.4	85171.1	19705.1	11673.4	18111.5	8596.74	7292.74	7919.82	4930.94	0	0	34306.9	31744.4	0	0	0	0	0	1950.08	0
COTU-CM-0324	0	0	0	0	0	0	0	0	0	0	0	0	0	0	0	0	0	0	0	0	0	0	0	0	0	0	0	0	0	0	0	0	0	4527.88	4298.37	0	0	0	32867.8	21301.6	0	0	0	0	0	0	0	0	0
COTU-CM-0325	0	0	0	0	0	0	0	0	0	0	0	0	0	0	0	0	0	0	0	0	0	0	0	0	0	0	0	0	0	0	0	0	128407	131308	193427	87512.9	102958	44378.5	49301.8	36517	20584.1	45853.1	0	0	0	0	0	0	0
COTU-CM-0331	20952.8	15502.1	0	11015.5	16136	9049.64	53097.3	45919.8	7582.64	0	18652.7	13552.5	0	11872.4	0	0	0	8540.23	0	0	0	0	0	4953.03	0	0	0	0	0	0	0	0	23346.8	13583.6	4298.37	7292.74	7919.82	7396.42	0	0	13722.8	10581.5	0	0	0	0	0	0	0
COTU-CM-0332	0	0	0	0	0	0	0	0	68243.8	0	0	0	0	0	0	0	0	0	0	0	0	0	0	0	0	0	0	0	0	0	0	0	0	0	0	0	0	0	0	0	0	0	0	0	0	0	0	0	0
COTU-CM-0333	387627	279038	425448	260699	1.33929e+06	443432	732743	535732	197149	242105	889114	587275	502606	439277	658090	91180.5	43642.2	264747	96394.6	16822.4	350250	113530	46033.1	74295.5	107737	21625.4	160817	11351.4	75466.5	84513.5	63878.3	41380.7	0	0	0	0	0	0	9860.35	3043.09	13722.8	3527.16	0	0	0	0	0	0	0
COTU-CM-0334	0	0	0	0	0	0	0	0	0	0	0	58727.5	0	0	0	0	0	0	0	0	0	0	0	0	0	0	0	0	0	0	0	0	0	0	0	0	0	0	0	0	0	0	0	0	0	0	0	0	0
COTU-CM-0335	0	54257.4	0	0	0	0	95575.2	84186.4	90991.7	46859.1	0	0	0	0	0	0	0	8540.23	0	0	0	0	3836.09	7429.55	64642.3	6360.4	0	0	0	0	0	0	0	0	0	0	0	0	0	0	0	0	0	0	0	0	0	0	0
COTU-CM-0336	0	0	0	0	16136	9049.64	127434	68879.8	144070	31239.4	0	0	0	0	0	0	0	0	0	0	0	0	11508.3	4953.03	28729.9	7632.48	0	0	0	0	0	0	0	0	0	0	0	0	0	0	0	0	0	0	0	0	0	0	0
COTU-CM-0337	0	7751.05	0	0	16136	9049.64	106195	244906	212314	121053	0	0	0	0	0	0	0	8540.23	0	0	10301.5	0	46033.1	27241.7	122102	21625.4	0	0	0	0	0	0	0	0	4298.37	0	0	2465.47	13147.1	0	20584.1	3527.16	0	0	0	0	0	0	2357.72
COTU-CM-0338	0	0	0	0	0	0	0	0	0	0	0	54210	0	0	0	0	0	0	0	0	0	0	0	0	0	0	0	0	0	0	0	9852.56	0	0	0	0	0	0	0	0	0	0	0	0	0	0	0	0	0
COTU-CM-0339	0	0	0	0	0	54297.8	0	0	0	0	0	0	0	0	0	0	0	0	9639.46	0	0	0	0	0	0	0	0	0	0	0	0	0	0	0	0	0	0	0	0	0	0	0	0	0	0	0	0	0	0
COTU-CM-0340	0	0	0	0	0	0	0	0	0	0	0	0	0	0	0	0	0	0	0	0	0	0	0	0	0	0	0	0	0	0	0	0	595342	620319	563086	444857	419750	359959	995895	1.05899e+06	137228	126978	0	0	5309.73	5605.84	0	7800.31	9430.89
COTU-CM-0344	0	0	0	0	0	0	0	0	0	0	0	0	0	0	0	5698.78	0	0	0	0	0	0	0	0	0	0	0	0	0	0	0	0	89495.9	190171	133249	98452	79198.2	81360.6	23007.5	24344.7	185257	204575	8815.79	0	0	0	0	0	0
COTU-CM-0347	0	0	0	0	0	0	0	0	0	0	0	0	0	0	0	0	0	0	0	0	0	0	0	0	0	0	0	0	0	0	0	0	3891.13	9055.76	17193.5	7292.74	0	7396.42	9860.35	42603.2	54891	49380.2	0	0	0	0	0	0	0
COTU-CM-0348	0	0	0	0	0	0	0	0	0	0	0	4517.5	0	0	0	0	0	0	0	0	0	0	0	0	0	0	0	0	0	0	0	0	23346.8	9055.76	21491.8	43756.4	71278.3	14792.8	9860.35	18258.5	0	7054.32	0	0	0	3737.23	1758.53	0	0
COTU-CM-0349	10476.4	69759.5	28746.5	25702.8	64544.1	0	10619.5	0	7582.64	7809.85	37305.5	31622.5	72665.9	3957.45	74783	17096.3	0	8540.23	0	9345.79	0	12163.9	3836.09	2476.52	7182.47	0	0	1621.62	0	0	7097.59	1970.51	0	0	0	0	0	2465.47	3286.78	3043.09	0	17635.8	0	0	0	0	0	0	0
COTU-CM-0350	0	0	0	0	0	0	10619.5	0	0	0	0	0	0	0	0	0	0	0	0	0	0	0	0	0	0	0	0	0	0	0	0	0	35020.1	13583.6	8596.74	32817.3	7919.82	34516.6	0	6086.17	0	7054.32	0	0	0	0	0	0	0
COTU-CM-0351	0	0	0	0	0	0	0	0	0	0	0	0	0	0	0	0	0	0	0	0	0	0	0	0	0	0	0	0	0	0	0	0	0	9055.76	4298.37	0	0	2465.47	3286.78	0	54891	88179	0	0	0	0	0	0	0
COTU-CM-0352	20952.8	77510.5	57493	47733.7	16136	9049.64	106195	114800	7582.64	3904.92	68393.4	140042	36332.9	31659.6	134609	39891.5	0	8540.23	0	5607.48	10301.5	0	0	2476.52	14364.9	0	7657.96	1621.62	0	0	7097.59	0	0	0	0	0	0	0	0	0	0	0	0	0	0	0	0	0	0
COTU-CM-0353	52382	23253.2	51743.7	11015.5	0	0	63716.8	61226.5	7582.64	3904.92	37305.5	58727.5	36332.9	0	104696	28493.9	0	8540.23	0	0	0	0	7672.19	0	0	0	0	810.811	0	2817.12	0	0	7782.25	9055.76	38685.3	3646.37	0	4930.94	6573.57	0	171534	137559	8815.79	0	0	0	0	0	0
COTU-CM-0354	0	0	0	0	0	0	0	0	0	0	0	0	0	0	0	0	0	0	0	0	0	0	0	0	0	0	0	0	0	0	0	0	0	9055.76	12895.1	29171	23759.4	4930.94	420708	1.63414e+06	20584.1	35271.6	0	0	0	7474.45	0	0	2357.72
COTU-CM-0355	0	0	0	0	0	0	0	0	0	0	0	0	0	0	0	0	0	0	0	0	0	0	0	0	0	0	0	0	0	0	0	0	7782.25	13583.6	4298.37	3646.37	0	2465.47	13147.1	18258.5	54891	59961.7	0	0	0	0	0	0	0
COTU-CM-0356	0	7751.05	5749.3	0	32272	9049.64	21238.9	0	0	0	12435.2	31622.5	0	3957.45	14956.6	11397.6	0	0	0	934.579	0	0	0	0	7182.47	0	0	810.811	0	0	0	0	7782.25	0	0	10939.1	0	12327.4	3286.78	3043.09	0	0	0	0	0	0	0	0	0
COTU-CM-0357	0	0	0	0	0	0	0	0	0	0	0	0	0	0	0	0	0	0	0	0	0	0	0	0	0	0	0	0	0	0	0	0	42802.4	22639.4	25790.2	36463.7	47518.9	27120.2	3286.78	18258.5	0	42325.9	0	0	0	0	0	3900.16	0
COTU-CM-0358	10476.4	31004.2	74740.9	58749.1	96816.1	36198.5	42477.9	15306.6	53078.5	3904.92	80828.5	81315	12111	0	44869.8	28493.9	0	0	0	0	0	0	0	2476.52	14364.9	1272.08	7657.96	4054.05	3430.3	0	7097.59	0	3891.13	0	8596.74	14585.5	7919.82	2465.47	16433.9	21301.6	20584.1	49380.2	0	0	0	0	0	0	0
COTU-CM-0359	0	7751.05	34495.8	14687.3	0	9049.64	0	0	37913.2	7809.85	49740.6	36140	0	7914.9	0	11397.6	0	0	0	934.579	0	0	0	0	7182.47	0	0	0	0	2817.12	0	0	0	0	0	0	0	0	0	0	0	0	0	0	0	0	0	0	0
COTU-CM-0360	0	0	0	0	0	0	10619.5	0	0	0	0	0	0	0	0	11397.6	0	0	0	0	0	0	0	0	0	0	0	0	0	0	0	0	3891.13	4527.88	0	3646.37	0	0	0	0	20584.1	24690.1	0	0	0	0	0	0	0
COTU-CM-0361	0	15502.1	0	0	0	0	0	0	0	0	37305.5	0	0	3957.45	0	0	0	8540.23	0	0	0	0	0	0	0	0	0	0	0	0	0	0	0	0	0	0	0	0	0	0	0	0	0	0	0	0	0	0	0
COTU-CM-0362	0	0	5749.3	0	16136	0	0	0	0	3904.92	6217.58	4517.5	0	0	44869.8	0	0	0	9639.46	0	0	0	0	0	0	0	0	810.811	0	0	0	0	31129	18111.5	12895.1	40110.1	31679.3	29585.7	6573.57	36517	13722.8	151668	0	0	0	0	0	0	0
COTU-CM-0363	0	0	0	0	0	0	0	0	0	0	0	0	0	0	0	0	0	0	0	0	0	0	0	0	0	0	0	0	0	0	0	0	15564.5	13583.6	4298.37	29171	31679.3	29585.7	3286.78	24344.7	0	42325.9	0	0	0	0	0	0	0
COTU-CM-0364	0	0	5749.3	0	0	0	0	7653.31	7582.64	0	6217.58	0	0	0	0	0	0	8540.23	0	0	0	0	0	0	0	0	0	0	0	0	0	0	0	0	0	3646.37	7919.82	2465.47	3286.78	3043.09	0	38798.8	0	0	0	0	0	0	0
COTU-CM-0365	0	0	0	0	0	0	0	0	0	0	0	0	0	0	0	0	0	51241.4	0	0	0	0	0	0	0	0	0	0	0	0	0	0	0	0	0	0	0	0	0	0	0	0	0	0	0	0	0	0	0
COTU-CM-0367	0	0	0	0	0	0	0	0	0	0	0	0	0	0	0	0	0	0	0	0	0	0	0	0	0	0	0	0	0	0	0	0	11673.4	27167.3	21491.8	36463.7	31679.3	51774.9	19720.7	36517	13722.8	67016	0	0	0	0	0	0	0
COTU-CM-0369	20952.8	23253.2	17247.9	3671.82	548625	135745	31858.4	22959.9	7582.64	3904.92	0	4517.5	12111	0	29913.2	0	0	0	0	0	30904.4	40546.4	0	2476.52	0	0	0	0	0	0	0	0	0	4527.88	8596.74	10939.1	0	7396.42	3286.78	3043.09	0	28217.3	0	0	0	0	0	0	0
COTU-CM-0370	0	0	0	0	0	0	0	0	0	0	0	0	0	0	0	0	0	0	0	0	0	0	0	0	0	0	0	0	0	0	0	0	3891.13	36223	21491.8	32817.3	15839.6	24654.7	0	0	6861.38	0	0	0	0	1868.61	3517.06	1950.08	0
COTU-CM-0371	0	0	0	0	0	0	0	0	0	0	0	0	0	0	0	0	0	0	0	0	0	0	0	0	0	0	0	0	0	0	0	0	0	0	4298.37	3646.37	7919.82	9861.89	19720.7	12172.3	54891	38798.8	0	0	0	0	0	0	0
COTU-CM-0372	0	0	0	0	0	0	0	0	0	0	0	0	0	0	0	0	0	0	0	0	0	0	0	0	0	0	0	0	0	0	0	0	0	4527.88	4298.37	14585.5	39599.1	17258.3	39441.4	57818.6	0	31744.4	0	0	0	0	0	0	2357.72
COTU-CM-0373	0	0	0	0	0	0	0	0	0	0	0	0	0	0	0	0	0	0	0	0	0	0	0	0	0	0	0	0	0	0	0	0	0	0	0	3646.37	7919.82	4930.94	42728.2	48689.4	0	21163	0	0	0	0	0	0	0
COTU-CM-0374	0	0	0	0	0	0	0	0	0	0	0	0	0	0	0	0	0	0	0	0	0	0	0	0	0	0	0	0	0	0	0	0	85604.8	81501.8	90265.8	196904	158396	152859	13147.1	27387.8	164673	328026	0	0	0	1868.61	0	1950.08	0
COTU-CM-0375	31429.2	38755.3	74740.9	7343.64	16136	0	74336.3	99493	60661.2	11714.8	130569	85832.5	18166.5	7914.9	134609	28493.9	0	42701.2	0	0	0	0	0	0	0	10176.6	0	810.811	3430.3	2817.12	7097.59	17734.6	0	0	4298.37	0	0	2465.47	3286.78	12172.3	20584.1	0	0	0	0	0	0	0	0
COTU-CM-0376	261910	325544	442696	271715	1.75883e+06	552028	700885	673491	326054	101528	665281	397540	435995	364085	1.36105e+06	547083	36368.5	68321.9	96394.6	11215	103015	64874.2	53705.3	61912.9	272934	44522.8	99553.5	29189.2	48024.1	22536.9	49683.1	66997.4	11673.4	4527.88	12895.1	18231.9	31679.3	22189.2	29581.1	66947.9	48029.6	24690.1	0	0	0	0	0	0	0
COTU-CM-0377	0	85261.6	0	0	0	0	21238.9	53573.2	0	0	62175.8	36140	6055.49	3957.45	0	0	7273.71	0	9639.46	0	0	0	0	0	0	0	0	0	0	0	0	0	0	0	0	0	0	0	0	0	0	0	0	0	0	0	0	0	0
COTU-CM-0378	52382	15502.1	74740.9	44061.9	306584	135745	74336.3	53573.2	7582.64	19524.6	62175.8	58727.5	60554.9	71234.1	209392	119674	0	0	0	2803.74	20602.9	20273.2	7672.19	9906.06	64642.3	3816.24	7657.96	3243.24	17151.5	2817.12	14195.2	5911.53	0	0	0	0	0	0	0	0	0	0	0	0	0	0	0	0	0
COTU-CM-0379	0	0	0	0	0	0	0	0	0	0	0	0	0	0	0	0	0	0	0	0	0	0	0	0	0	0	0	0	0	0	0	0	38911.3	104141	42983.7	87512.9	63358.5	64102.3	39441.4	167370	0	10581.5	0	0	0	3737.23	8792.65	0	0
COTU-CM-0380	0	0	0	0	0	0	0	0	0	0	0	0	0	0	0	0	0	0	0	0	0	0	0	0	0	0	0	0	0	0	0	0	11673.4	4527.88	25790.2	18231.9	0	19723.8	0	0	6861.38	31744.4	8815.79	6000	0	0	0	5850.23	0
COTU-CM-0381	10476.4	7751.05	17247.9	11015.5	16136	9049.64	42477.9	53573.2	0	0	31087.9	31622.5	0	11872.4	14956.6	0	0	8540.23	0	0	0	0	0	2476.52	0	0	22973.9	810.811	0	0	0	1970.51	31129	22639.4	21491.8	43756.4	39599.1	71498.7	0	0	0	3527.16	0	0	5309.73	5605.84	7034.12	1950.08	0
COTU-CM-0382	0	0	0	0	0	0	0	0	0	0	0	0	0	0	0	0	0	0	0	0	0	0	0	0	0	0	0	0	0	0	0	0	0	9055.76	4298.37	3646.37	7919.82	9861.89	26294.3	30430.9	6861.38	31744.4	0	0	0	0	0	1950.08	0
COTU-CM-0383	0	0	0	0	0	0	0	0	0	0	0	0	0	0	0	0	0	0	0	0	0	0	0	0	0	0	0	0	0	0	0	0	11673.4	22639.4	12895.1	69281	55438.7	46844	55875.3	146068	6861.38	201048	0	0	5309.73	0	0	1950.08	0
COTU-CM-0388	20952.8	31004.2	17247.9	7343.64	0	0	10619.5	7653.31	0	3904.92	37305.5	9035	12111	7914.9	44869.8	39891.5	0	0	0	0	0	8109.27	0	0	0	0	0	0	0	0	0	1970.51	3891.13	9055.76	0	0	7919.82	4930.94	6573.57	36517	6861.38	17635.8	0	0	0	0	0	0	0
COTU-CM-0389	0	0	0	0	0	0	0	0	0	0	0	0	0	0	0	0	0	0	0	0	0	0	0	0	0	0	0	0	0	0	0	0	0	4527.88	4298.37	3646.37	0	7396.42	29581.1	9129.26	75475.1	74070.4	0	0	0	0	0	0	0
COTU-CM-0390	0	0	0	0	0	0	0	0	0	0	0	0	0	0	0	0	0	0	0	0	0	0	0	0	0	0	0	0	0	0	0	0	19455.6	27167.3	12895.1	14585.5	31679.3	7396.42	72309.2	33473.9	150950	144614	0	0	0	0	0	0	0
COTU-CM-0391	0	0	0	0	0	0	0	0	0	0	0	0	0	0	0	0	0	0	0	0	0	0	0	0	0	0	0	0	0	0	0	0	3891.13	0	0	0	0	0	19720.7	3043.09	20584.1	17635.8	0	0	0	0	0	0	0
COTU-CM-0392	0	0	0	0	0	0	0	0	0	0	0	0	0	0	0	0	0	0	0	0	0	0	0	0	0	0	0	0	0	0	0	0	0	0	0	0	0	0	26294.3	3043.09	0	3527.16	0	0	0	0	0	0	0
COTU-CM-0393	0	0	0	0	0	0	0	0	0	0	0	0	0	0	0	0	0	0	0	0	0	0	0	0	0	0	0	0	0	0	0	0	0	0	0	0	0	0	42728.2	33473.9	13722.8	10581.5	0	0	0	0	0	0	0
COTU-CM-0394	0	0	0	0	0	0	0	0	0	0	0	0	0	0	0	0	0	0	0	0	0	0	0	0	0	0	0	0	0	0	0	0	27237.9	27167.3	64475.5	54695.6	23759.4	39447.6	9860.35	27387.8	41168.3	56434.6	0	0	0	0	0	0	0
COTU-CM-0395	0	0	0	0	1.54906e+06	579177	0	0	0	0	0	0	0	0	0	0	0	0	0	0	309044	97311.3	0	0	0	0	0	0	0	0	0	0	15564.5	18111.5	12895.1	0	0	12327.4	26294.3	33473.9	13722.8	10581.5	0	0	0	0	0	0	0
COTU-CM-0396	0	0	0	0	0	0	0	0	0	0	0	0	0	0	0	0	0	0	0	0	0	0	0	0	0	0	0	0	0	0	0	0	27237.9	45278.8	12895.1	18231.9	23759.4	9861.89	9860.35	12172.3	6861.38	3527.16	0	0	0	0	0	0	0
COTU-CM-0397	0	0	0	0	0	0	0	0	0	0	0	0	0	0	0	0	0	0	0	0	0	0	0	0	0	0	0	0	0	0	0	0	19455.6	0	4298.37	3646.37	7919.82	9861.89	6573.57	0	27445.5	31744.4	0	0	0	0	0	0	0
COTU-CM-0400	0	0	0	0	0	0	0	0	7582.64	0	62175.8	76797.5	0	0	0	0	0	0	0	0	0	0	0	0	0	0	0	810.811	0	0	0	0	3891.13	13583.6	0	14585.5	7919.82	0	36154.6	73034	0	0	0	0	0	0	0	0	0
COTU-CM-0401	0	0	0	0	0	0	0	0	0	0	0	0	0	0	0	0	0	0	0	0	0	0	0	0	0	0	0	0	0	0	0	0	210121	185643	197725	127623	126717	88757	36154.6	27387.8	96059.3	31744.4	0	0	0	0	0	0	0
COTU-CM-0402	10476.4	7751.05	5749.3	0	0	0	0	0	0	0	6217.58	0	0	0	0	0	0	0	0	0	0	0	0	0	0	0	0	0	0	0	0	0	46693.5	4527.88	12895.1	18231.9	15839.6	4930.94	39441.4	24344.7	13722.8	14108.6	0	0	0	1868.61	0	0	0
COTU-CM-0403	10476.4	0	0	0	0	0	0	0	0	0	0	0	0	0	0	0	0	0	0	0	0	0	0	0	0	0	0	0	0	0	0	0	15564.5	13583.6	8596.74	14585.5	31679.3	7396.42	16433.9	3043.09	48029.6	17635.8	0	0	0	0	0	0	0
COTU-CM-0404	0	0	0	0	0	0	0	0	0	0	0	0	0	0	0	0	0	0	0	0	0	0	0	0	0	0	0	0	0	0	0	0	0	0	0	0	0	0	0	0	0	0	0	0	0	0	26378	0	0
COTU-CM-0405	0	0	0	0	0	0	0	0	0	0	0	0	0	0	0	0	0	0	0	0	0	0	0	0	0	0	0	0	0	0	0	0	408568	375814	335273	134916	158396	91222.5	861137	675565	1.41344e+06	906480	0	0	0	0	0	0	0
COTU-CM-0406	0	0	0	0	0	0	0	0	0	0	0	0	0	0	0	0	0	0	0	0	0	0	0	0	0	0	0	0	0	0	0	0	0	0	0	0	0	0	118324	85206.4	288178	109342	0	0	0	0	0	0	0
COTU-CM-0407	0	0	0	0	0	0	0	0	45495.9	0	0	0	0	0	0	0	0	0	0	0	0	0	0	0	0	0	0	0	0	0	0	0	0	0	0	0	0	0	0	0	0	0	0	0	0	0	0	0	0
COTU-CM-0408	0	0	0	0	0	0	0	0	0	0	0	0	48443.9	0	0	0	0	0	0	0	0	0	0	0	0	0	0	0	0	0	0	0	0	4527.88	0	0	0	0	0	0	0	0	0	0	0	0	0	0	0
COTU-CM-0409	52382	85261.6	34495.8	44061.9	112952	81446.7	42477.9	76533.1	15165.3	15619.7	62175.8	31622.5	66610.4	39574.5	59826.4	22795.1	7273.71	42701.2	28918.4	3738.32	92713.3	24327.8	30688.8	9906.06	0	3816.24	45947.8	2432.43	6860.59	112685	14195.2	1970.51	7782.25	0	4298.37	3646.37	7919.82	2465.47	6573.57	9129.26	20584.1	10581.5	0	6000	0	0	0	0	0
COTU-CM-0413	0	0	0	0	0	0	0	0	0	0	0	0	0	0	0	0	0	0	0	0	0	0	0	0	0	0	0	0	0	0	0	0	7782.25	13583.6	8596.74	0	15839.6	4930.94	23007.5	12172.3	20584.1	7054.32	0	0	0	0	0	0	0
COTU-CM-0414	0	0	0	0	0	0	0	0	0	0	0	0	6055.49	0	0	0	0	0	0	0	0	0	0	0	0	0	0	0	0	0	0	0	58366.9	45278.8	107459	40110.1	15839.6	12327.4	184060	109551	212703	204575	0	0	0	0	0	0	0
COTU-CM-0415	0	0	0	0	0	0	0	0	0	0	0	0	0	0	0	0	0	0	0	0	0	0	0	0	0	0	0	0	0	0	0	0	35020.1	27167.3	12895.1	18231.9	15839.6	7396.42	0	0	0	10581.5	0	0	0	0	0	0	0
COTU-CM-0417	0	0	0	0	0	0	0	0	0	0	0	0	0	0	0	0	0	0	0	0	0	0	0	0	0	0	0	0	0	0	0	0	0	0	0	0	0	0	0	0	0	0	0	0	0	0	10551.2	0	0
COTU-CM-0418	10476.4	0	0	0	0	0	0	7653.31	0	0	0	0	0	0	0	0	0	0	0	1869.16	0	0	26852.7	0	0	0	0	0	0	0	0	0	0	0	0	0	0	0	0	0	0	0	0	0	0	0	0	0	0
COTU-CM-0419	0	0	0	0	0	0	0	0	0	0	0	0	0	0	0	0	0	0	0	0	0	0	0	0	0	0	0	0	0	0	0	0	470826	357702	464224	258892	411830	355028	351686	340826	82336.5	67016	26447.4	6000	0	13080.3	8792.65	0	9430.89
COTU-CM-0420	31429.2	15502.1	5749.3	3671.82	0	0	0	45919.8	0	0	74611	67762.5	36332.9	11872.4	29913.2	5698.78	0	0	0	0	0	0	0	0	0	0	22973.9	0	3430.3	0	0	0	0	4527.88	0	3646.37	0	0	0	0	6861.38	7054.32	0	0	0	0	0	0	0
COTU-CM-0421	0	0	0	0	0	0	0	0	0	0	0	0	0	0	0	0	0	0	0	0	0	0	0	0	0	0	0	0	0	0	0	0	7782.25	9055.76	8596.74	7292.74	0	12327.4	13147.1	30430.9	13722.8	42325.9	0	0	0	0	0	0	0
COTU-CM-0425	0	0	0	0	0	0	0	0	0	0	0	0	0	0	0	0	0	0	0	0	0	0	0	0	0	0	0	0	0	0	0	0	27237.9	27167.3	12895.1	0	15839.6	0	23007.5	21301.6	164673	67016	0	0	0	0	0	0	0
COTU-CM-0426	0	0	0	0	0	0	0	0	0	0	0	0	0	0	0	0	0	0	0	0	0	0	0	0	0	0	0	0	0	0	0	0	27237.9	13583.6	4298.37	7292.74	15839.6	7396.42	0	0	20584.1	3527.16	0	0	0	0	0	0	0
COTU-CM-0429	0	0	0	0	0	0	0	0	0	0	0	0	0	0	0	0	0	0	0	0	0	0	0	0	0	0	0	0	0	0	70975.9	0	0	0	0	0	0	0	0	0	0	0	0	0	0	0	0	0	0
COTU-CM-0433	0	0	0	0	0	0	0	0	0	0	0	0	36332.9	0	0	0	0	0	0	0	0	0	0	0	0	0	0	0	0	0	0	0	0	0	0	0	0	0	0	0	0	0	0	0	0	0	0	0	0
COTU-CM-0434	0	0	0	0	0	0	0	0	0	0	0	0	0	0	89739.6	0	0	0	0	0	0	0	0	0	0	0	0	0	0	0	0	0	0	0	0	0	0	0	0	0	0	0	0	0	0	0	0	0	0
COTU-CM-0435	0	0	0	0	0	0	0	0	0	0	0	0	0	0	0	0	0	0	0	0	0	0	0	0	0	0	0	0	0	0	0	0	0	0	0	0	0	0	0	0	1.1136e+07	6.57463e+06	0	0	0	0	0	0	0
COTU-CM-0441	0	7751.05	5749.3	3671.82	0	0	0	84186.4	0	0	0	0	0	0	0	0	7273.71	0	0	0	0	0	0	0	0	0	0	0	0	0	0	0	42802.4	31695.2	38685.3	25524.6	15839.6	12327.4	26294.3	12172.3	20584.1	21163	0	0	0	0	0	0	0
COTU-CM-0448	0	0	0	0	0	0	95575.2	68879.8	0	0	907767	813150	0	0	0	0	0	0	0	0	0	0	26852.7	7429.55	0	0	160817	17837.8	0	0	0	0	50584.6	49806.7	60177.2	47402.8	23759.4	24654.7	55875.3	18258.5	54891	21163	0	0	0	1868.61	0	0	0
COTU-CM-0457	0	0	0	0	0	0	0	0	0	0	0	0	0	0	0	0	0	0	0	0	0	0	0	0	0	0	0	0	0	0	0	0	38911.3	18111.5	25790.2	10939.1	0	2465.47	6573.57	3043.09	0	0	8815.79	0	0	0	0	0	0
COTU-CM-0458	0	0	0	0	0	0	0	0	0	0	0	0	0	0	0	0	0	0	0	0	0	0	0	0	0	0	0	0	0	0	0	0	70040.3	86029.7	103161	32817.3	0	19723.8	6573.57	9129.26	0	0	0	0	0	18686.1	0	1950.08	0
COTU-CM-0459	0	0	0	0	0	0	0	0	0	0	0	0	0	0	0	0	0	0	0	0	0	0	0	0	0	0	0	0	0	0	0	0	19455.6	13583.6	30088.6	10939.1	7919.82	7396.42	6573.57	6086.17	0	0	0	0	0	0	0	0	0
COTU-CM-0460	0	0	0	0	0	0	0	0	0	0	0	0	0	0	0	0	0	0	0	0	0	0	0	0	0	0	0	0	0	0	0	0	0	0	0	0	0	0	55875.3	66947.9	0	0	0	0	0	0	0	0	0
COTU-CM-0461	0	0	0	0	0	0	0	0	0	0	0	0	0	0	0	0	0	0	0	0	0	0	0	0	0	0	0	0	0	0	0	0	0	0	0	0	0	0	0	0	96059.3	91706.2	0	0	0	0	0	0	0
COTU-CM-0462	0	0	0	0	0	0	0	0	0	0	0	0	0	0	0	0	0	0	0	0	0	0	0	0	0	0	0	0	0	0	0	0	291834	239978	343870	175026	213835	125739	147905	36517	171534	88179	8815.79	0	0	0	3517.06	3900.16	2357.72
COTU-CM-0463	0	0	0	0	0	0	0	0	0	0	0	0	0	0	0	0	0	0	0	0	0	0	0	0	0	0	0	0	0	0	0	0	105060	104141	137548	72927.4	15839.6	24654.7	13147.1	18258.5	6861.38	0	8815.79	0	10619.5	1868.61	0	0	0
COTU-CM-0464	0	7751.05	11498.6	7343.64	48408.1	63347.5	84955.8	53573.2	0	11714.8	12435.2	0	36332.9	23744.7	29913.2	5698.78	0	59781.6	0	19626.2	30904.4	36491.7	38360.9	7429.55	14364.9	11448.7	15315.9	0	10290.9	19719.8	0	21675.6	178992	185643	219217	120330	118797	78895.1	0	0	0	0	8815.79	0	5309.73	13080.3	5275.59	11700.5	0
COTU-CM-0466	31429.2	31004.2	17247.9	14687.3	48408.1	45248.2	106195	61226.5	7582.64	11714.8	6217.58	0	30277.5	11872.4	0	0	0	0	0	7476.64	0	0	57541.4	0	0	11448.7	0	0	0	22536.9	0	19705.1	194556	185643	197725	61988.3	95037.8	66567.7	0	0	0	0	0	18000	10619.5	11211.7	14068.2	7800.31	0
COTU-CM-0470	0	0	0	0	0	0	0	0	98574.4	62478.8	0	0	0	0	0	0	0	0	0	0	0	0	0	0	14364.9	13992.9	0	0	0	0	0	0	7782.25	9055.76	12895.1	7292.74	15839.6	9861.89	13147.1	9129.26	61752.4	14108.6	0	0	0	0	0	0	0
COTU-CM-0471	0	0	0	0	0	0	0	0	0	0	0	0	0	0	0	0	0	0	0	0	0	0	0	0	0	0	0	0	0	0	0	0	77822.5	81501.8	98862.5	127623	95037.8	61636.8	1.28842e+06	1.54589e+06	2.66908e+06	2.06339e+06	0	0	0	0	1758.53	0	2357.72
COTU-CM-0472	0	0	0	0	0	0	0	0	0	0	0	0	0	0	0	0	0	0	0	0	0	0	0	0	0	0	0	0	0	0	0	0	478609	389398	404047	291710	316793	285995	0	0	89197.9	84651.8	35263.2	36000	26548.7	71007.3	58031.5	58502.3	0
COTU-CM-0473	0	0	0	0	0	0	0	0	0	0	0	0	0	0	0	0	0	0	0	0	0	0	0	0	0	0	0	0	0	0	0	0	0	0	0	0	0	0	19720.7	36517	13722.8	10581.5	0	0	0	0	0	0	0
COTU-CM-0475	0	0	0	0	0	0	0	0	0	0	6217.58	4517.5	0	0	0	0	0	0	0	0	0	0	0	0	0	0	7657.96	810.811	0	0	0	0	11673.4	27167.3	51580.4	10939.1	7919.82	14792.8	3286.78	9129.26	13722.8	0	8815.79	0	0	0	0	0	0
COTU-CM-0478	0	0	0	0	0	0	0	0	0	0	0	0	0	0	0	0	0	0	0	0	0	0	0	0	0	0	0	0	0	0	0	0	7782.25	13583.6	0	7292.74	15839.6	9861.89	19720.7	6086.17	0	0	0	0	0	0	0	0	0
COTU-CM-0479	0	0	0	0	0	0	0	0	0	0	0	0	0	0	0	0	0	0	0	0	0	0	0	0	0	0	0	0	0	0	0	0	58366.9	27167.3	51580.4	7292.74	0	19723.8	19720.7	9129.26	82336.5	59961.7	0	0	0	5605.84	0	0	0
COTU-CM-0480	0	0	0	0	0	0	0	0	0	0	0	0	0	0	0	0	0	0	0	0	0	0	0	0	0	0	0	0	0	0	0	0	15564.5	9055.76	0	10939.1	0	12327.4	0	0	6861.38	0	0	0	0	0	0	0	0
COTU-CM-0481	0	0	0	0	0	0	0	0	0	0	0	0	0	0	0	0	0	0	0	0	0	0	0	0	0	0	0	0	0	0	0	0	0	0	4298.37	0	0	0	299097	295179	3.71887e+06	2.35967e+06	0	0	0	0	0	0	2357.72
COTU-CM-0482	0	0	0	0	0	0	0	0	0	0	0	0	0	0	0	0	0	0	0	0	0	0	0	0	0	0	0	0	0	0	0	0	171210	203755	154741	65634.7	118797	59171.3	0	0	226425	225738	17631.6	12000	0	5605.84	1758.53	3900.16	2357.72
COTU-CM-0483	0	7751.05	0	0	32272	0	10619.5	0	0	0	0	4517.5	6055.49	0	0	11397.6	0	8540.23	0	0	0	0	0	0	0	0	0	0	0	2817.12	0	0	3891.13	4527.88	0	18231.9	0	14792.8	6573.57	0	13722.8	3527.16	0	0	5309.73	0	0	0	0
COTU-CM-0484	0	0	0	0	0	0	0	0	0	0	0	0	0	0	0	0	0	0	0	0	0	0	0	0	0	0	0	0	0	0	0	0	0	0	0	0	0	0	13147.1	27387.8	0	0	0	0	0	0	0	0	0
COTU-CM-0500	0	0	0	0	0	0	0	0	0	0	0	0	0	0	0	0	0	0	0	0	0	0	0	0	0	0	0	0	0	0	0	0	0	0	0	0	0	0	0	21301.6	0	0	0	0	0	0	0	0	0
COTU-CM-0501	0	0	0	0	48408.1	0	0	0	0	0	6217.58	4517.5	0	0	0	0	0	0	0	0	0	4054.64	0	0	0	0	0	0	3430.3	0	0	0	11673.4	13583.6	4298.37	21878.2	7919.82	0	6573.57	6086.17	0	0	0	0	0	0	1758.53	0	0
COTU-CM-0502	0	0	0	0	0	0	0	0	0	0	0	0	0	0	0	0	0	0	0	0	0	0	0	0	0	0	0	0	0	0	0	0	35020.1	22639.4	21491.8	18231.9	0	7396.42	82169.6	54775.5	6861.38	7054.32	0	0	0	0	0	0	0
COTU-CM-0503	0	0	0	0	0	0	0	0	0	0	0	0	0	0	0	0	0	0	0	0	0	0	0	0	0	0	0	0	0	0	0	0	3891.13	0	4298.37	0	0	0	157766	200844	171534	102288	0	0	0	0	0	0	0
COTU-CM-0504	0	0	0	0	0	0	0	0	0	0	0	0	0	0	0	0	0	0	0	0	0	0	0	0	0	0	0	0	0	0	0	0	15564.5	13583.6	17193.5	7292.74	15839.6	4930.94	746100	185628	768474	303336	0	0	0	0	0	0	0
COTU-CM-0505	0	0	0	0	0	0	0	0	0	0	0	0	0	0	0	0	0	0	0	0	0	0	0	0	0	0	0	0	0	0	0	0	7782.25	0	8596.74	10939.1	0	4930.94	3286.78	3043.09	109782	35271.6	0	0	0	0	0	0	0
COTU-CM-0506	0	0	0	0	0	0	0	0	0	0	0	0	0	0	0	0	0	0	0	0	0	0	0	0	0	0	0	0	0	0	0	0	1.67708e+06	1.47156e+06	1.55171e+06	765738	609826	493094	1.11751e+06	456463	2.14075e+06	1.24509e+06	17631.6	0	0	1868.61	1758.53	3900.16	0
COTU-CM-0508	0	0	0	0	0	0	0	0	0	23429.5	37305.5	0	18166.5	27702.2	0	34192.7	0	0	0	0	0	0	0	0	14364.9	3816.24	7657.96	0	3430.3	2817.12	0	9852.56	0	0	0	0	0	0	0	0	0	0	0	0	0	0	0	0	0
COTU-CM-0509	0	0	0	0	0	0	0	0	75826.4	175722	37305.5	9035	30277.5	35617.1	59826.4	245047	0	0	0	0	0	0	0	0	222657	20353.3	15315.9	0	3430.3	8451.35	14195.2	55174.3	0	0	0	0	0	0	0	0	0	0	0	0	0	0	0	0	0
COTU-CM-0510	0	0	0	0	0	0	0	0	0	0	0	0	0	0	0	0	0	0	0	0	0	0	0	0	0	0	0	0	0	0	0	0	0	0	4298.37	0	0	7396.42	3286.78	0	27445.5	28217.3	0	0	0	0	0	0	0
COTU-CM-0513	0	0	0	0	0	0	0	0	0	0	0	0	0	0	0	0	0	0	0	0	0	0	0	0	0	0	0	0	0	0	0	0	50584.6	58862.4	38685.3	43756.4	47518.9	46844	0	3043.09	123505	197521	0	0	0	0	0	0	0
COTU-CM-0514	0	0	0	0	0	0	0	0	0	0	0	0	0	0	0	0	0	0	0	0	0	0	0	0	0	0	0	0	0	0	0	0	11673.4	9055.76	4298.37	18231.9	0	2465.47	118324	73034	0	7054.32	0	0	0	0	0	0	0
COTU-CM-0515	0	0	0	0	0	0	0	0	0	0	0	0	0	0	0	0	0	0	0	0	0	0	0	0	0	0	0	0	0	0	0	0	159536	131308	85967.4	29171	102958	27120.2	3286.78	0	0	0	0	0	0	3737.23	0	1950.08	0
COTU-CM-0516	0	0	0	0	0	0	0	0	0	0	0	0	0	0	0	0	0	0	0	0	0	0	0	0	0	0	0	0	0	0	0	0	0	0	0	0	0	0	910439	383429	13722.8	10581.5	0	0	0	0	0	0	11788.6
COTU-CM-0517	0	0	0	0	0	0	21238.9	0	0	0	6217.58	4517.5	0	0	0	0	0	0	0	0	0	0	0	0	0	0	22973.9	0	0	0	0	0	7782.25	9055.76	0	0	0	0	23007.5	3043.09	13722.8	3527.16	0	0	0	0	0	0	0
COTU-CM-0518	0	0	0	0	0	0	0	0	0	0	0	0	0	0	0	0	0	0	0	0	0	0	0	0	0	0	0	0	0	0	0	0	46693.5	49806.7	68773.9	3646.37	0	2465.47	0	0	0	0	0	0	0	0	0	0	0
COTU-CM-0519	0	0	0	0	0	0	0	0	0	0	0	0	0	0	0	0	0	0	0	0	0	0	0	0	0	0	0	0	0	0	0	0	46693.5	18111.5	25790.2	14585.5	0	4930.94	3286.78	0	61752.4	56434.6	8815.79	0	5309.73	0	1758.53	1950.08	0
COTU-CM-0520	10476.4	15502.1	5749.3	3671.82	0	0	0	0	15165.3	7809.85	0	18070	0	0	0	5698.78	0	17080.5	0	0	0	0	3836.09	0	0	1272.08	7657.96	0	0	0	0	5911.53	3891.13	9055.76	0	0	7919.82	0	0	0	13722.8	77597.5	0	0	0	0	0	0	0
COTU-CM-0527	0	0	11498.6	3671.82	0	0	0	0	0	0	0	0	0	0	44869.8	5698.78	0	0	0	0	0	0	0	0	0	0	0	0	0	0	0	0	116734	117725	111758	105745	23759.4	56705.9	26294.3	12172.3	13722.8	3527.16	0	0	0	0	0	0	0
COTU-CM-0529	10476.4	31004.2	0	47733.7	64544.1	36198.5	159292	68879.8	0	0	0	0	0	0	0	0	0	25620.7	9639.46	4672.9	10301.5	20273.2	19180.5	12382.6	0	0	0	0	0	0	0	0	0	0	0	0	0	0	0	0	0	0	0	0	0	0	0	0	0
COTU-CM-0530	0	0	0	0	0	0	0	0	0	0	0	0	0	0	0	0	0	0	0	0	0	0	0	0	0	0	0	0	0	0	0	0	1.56812e+06	1.26328e+06	1.53022e+06	736567	736543	655816	6573.57	6086.17	6861.38	0	8815.79	6000	5309.73	13080.3	8792.65	3900.16	0
COTU-CM-0531	0	0	0	0	0	0	0	0	0	0	0	0	0	0	0	0	0	0	0	0	0	0	0	0	0	0	0	0	0	0	0	0	0	0	0	0	0	4930.94	0	6086.17	20584.1	28217.3	0	0	0	0	0	0	0
COTU-CM-0532	0	0	0	0	112952	54297.8	106195	107146	0	0	0	0	0	0	0	0	0	0	0	0	20602.9	0	19180.5	2476.52	0	0	0	0	0	0	0	0	0	0	0	0	0	0	0	0	0	0	0	0	0	0	0	0	0
COTU-CM-0535	0	0	0	0	0	0	0	0	0	0	0	0	0	0	0	0	0	0	0	0	0	0	0	0	0	0	0	0	0	0	0	0	210121	153948	210620	58341.9	79198.2	71498.7	203781	176499	192119	88179	0	0	0	0	0	0	0
COTU-CM-0539	0	0	0	0	0	0	0	0	0	0	0	0	0	0	0	0	0	0	0	0	0	0	0	0	0	0	0	0	0	0	0	0	31129	13583.6	17193.5	21878.2	7919.82	22189.2	52588.5	51732.4	20584.1	14108.6	0	0	0	0	0	0	0
COTU-CM-0540	31429.2	7751.05	0	0	16136	0	0	0	0	0	68393.4	9035	0	0	0	0	0	17080.5	0	0	0	4054.64	0	0	0	0	0	0	0	0	0	3941.02	0	4527.88	0	0	0	0	3286.78	0	0	0	0	0	0	0	0	0	0
COTU-CM-0541	167622	155021	178228	150545	80680.1	27148.9	212389	214293	15165.3	11714.8	323314	230392	96887.9	35617.1	194436	56987.8	7273.71	102483	86755.2	13084.1	20602.9	4054.64	11508.3	12382.6	7182.47	1272.08	61263.7	810.811	6860.59	11268.5	14195.2	11823.1	7782.25	22639.4	12895.1	3646.37	7919.82	4930.94	16433.9	15215.4	6861.38	10581.5	0	0	0	0	0	0	0
COTU-CM-0542	0	0	0	0	0	0	0	0	0	0	0	0	36332.9	0	0	0	0	0	0	0	0	0	0	0	0	0	0	0	0	0	0	0	0	0	0	0	0	0	0	0	0	0	0	0	0	0	0	0	0
COTU-CM-0545	0	0	0	0	0	0	0	0	0	0	0	0	0	0	0	0	0	0	0	0	0	0	0	0	0	0	0	0	0	0	0	0	27237.9	27167.3	8596.74	29171	15839.6	7396.42	13147.1	15215.4	75475.1	45853.1	0	0	0	0	0	0	0
COTU-CM-0547	0	0	0	0	96816.1	18099.3	53097.3	114800	0	0	0	0	0	0	0	0	0	0	0	0	10301.5	12163.9	7672.19	9906.06	0	0	0	0	0	0	0	0	0	0	0	0	0	0	0	0	0	0	0	0	0	0	0	0	0
COTU-CM-0548	0	0	0	0	16136	9049.64	63716.8	68879.8	0	0	0	0	0	0	0	0	0	0	0	0	30904.4	4054.64	3836.09	4953.03	0	0	0	0	0	0	0	0	0	0	0	0	0	0	0	0	0	0	0	0	0	0	0	0	0
COTU-CM-0549	0	0	0	0	0	0	0	0	0	0	0	0	0	0	0	0	0	0	0	0	0	0	0	0	0	0	0	0	0	0	0	0	0	4527.88	0	0	0	2465.47	49301.8	18258.5	6861.38	10581.5	0	0	0	0	0	0	0
COTU-CM-0550	0	0	0	0	0	0	0	0	0	0	0	0	0	0	0	0	0	0	0	0	0	0	0	0	0	0	0	0	0	0	0	0	0	18111.5	4298.37	0	0	2465.47	65735.7	45646.3	20584.1	42325.9	0	0	0	0	0	0	0
COTU-CM-0551	0	0	0	0	0	0	0	0	0	0	317097	121972	0	0	194436	119674	0	0	0	0	0	0	0	0	0	0	38289.8	810.811	0	0	35488	13793.6	0	0	0	0	0	0	0	0	0	0	0	0	0	0	0	0	0
COTU-CM-0552	0	0	0	0	2.8238e+06	1.01356e+06	84955.8	122453	0	0	559582	298155	12111	7914.9	688003	113976	0	0	0	0	412059	129748	26852.7	17335.6	0	0	76579.6	4054.05	0	0	120659	39410.2	0	0	0	0	0	0	0	0	0	0	0	0	0	0	0	0	0
COTU-CM-0553	0	0	0	0	0	0	0	0	0	0	0	0	0	0	0	0	0	0	0	0	0	0	0	0	0	0	0	0	0	0	0	0	0	0	0	0	0	0	65735.7	51732.4	0	0	0	0	0	0	0	0	0
COTU-CM-0554	0	0	0	0	0	0	0	0	0	0	0	0	0	0	0	0	0	0	0	0	0	0	0	0	0	0	0	0	0	0	0	0	7782.25	13583.6	12895.1	0	7919.82	2465.47	16433.9	9129.26	171534	112869	0	0	0	0	0	0	0
COTU-CM-0555	0	0	0	0	0	0	0	0	0	0	0	0	0	0	0	0	0	0	0	0	0	0	0	0	0	0	0	0	0	0	0	0	19455.6	13583.6	8596.74	10939.1	0	4930.94	42728.2	30430.9	61752.4	35271.6	0	0	5309.73	0	0	0	0
COTU-CM-0556	0	0	11498.6	11015.5	0	18099.3	21238.9	0	22747.9	7809.85	12435.2	0	12111	3957.45	14956.6	0	0	0	0	0	0	4054.64	0	0	0	3816.24	7657.96	810.811	0	5634.24	7097.59	0	19455.6	58862.4	30088.6	32817.3	23759.4	24654.7	23007.5	24344.7	61752.4	28217.3	0	0	0	0	0	0	2357.72
COTU-CM-0557	0	0	0	0	0	0	0	0	7582.64	0	0	0	0	0	0	0	0	0	0	0	0	0	0	0	0	0	0	0	0	0	0	0	3891.13	18111.5	17193.5	18231.9	23759.4	2465.47	19720.7	12172.3	20584.1	10581.5	0	0	0	0	0	0	0
COTU-CM-0558	0	0	0	0	0	0	0	0	0	0	0	4517.5	0	0	0	142469	0	0	9639.46	0	0	0	0	0	0	1272.08	0	0	0	0	0	0	0	0	0	0	0	0	0	0	0	0	0	0	0	0	0	0	0
COTU-CM-0559	576202	736350	1.19011e+06	591163	3.43697e+06	968311	276106	260212	492872	238200	522277	420127	1.1021e+06	747958	2.52766e+06	524288	50915.9	409931	240987	64486	484169	154076	23016.6	22288.6	186744	52155.3	153159	3243.24	243551	191564	255513	96555.1	0	0	4298.37	3646.37	0	0	16433.9	3043.09	34306.9	31744.4	0	0	0	0	0	1950.08	4715.45
COTU-CM-0560	0	0	0	0	935889	325787	63716.8	38266.5	0	0	348185	94867.5	12111	0	284175	39891.5	0	0	0	0	82411.8	44601	7672.19	0	0	0	68921.7	2432.43	0	0	28390.4	5911.53	0	0	0	0	0	0	0	0	0	0	0	0	0	0	0	0	0
COTU-CM-0564	0	0	0	0	0	0	0	0	0	0	0	0	0	0	0	0	0	0	0	0	0	0	0	0	0	0	0	0	0	0	0	0	70040.3	54334.5	68773.9	25524.6	39599.1	29585.7	0	0	0	0	0	0	0	0	0	0	0
COTU-CM-0565	0	0	0	0	0	0	0	0	0	0	0	0	0	0	0	0	0	0	0	0	0	0	0	0	0	0	0	0	0	0	0	0	11673.4	18111.5	12895.1	7292.74	0	14792.8	0	0	6861.38	0	0	0	0	0	0	0	0
COTU-CM-0570	0	0	0	0	0	0	0	0	0	0	0	0	0	0	0	0	0	0	0	0	0	0	0	0	0	0	0	0	0	0	0	0	661491	783323	584578	364637	213835	300788	0	0	171534	88179	8815.79	6000	0	0	0	1950.08	0
COTU-CM-0571	0	0	0	0	64544.1	27148.9	84955.8	68879.8	0	0	0	0	0	0	0	0	0	0	0	0	0	4054.64	3836.09	14859.1	0	0	0	0	0	0	0	0	0	0	0	0	0	0	0	0	0	0	0	0	0	0	0	0	0
COTU-CM-0572	52382	85261.6	57493	58749.1	0	18099.3	42477.9	30613.2	113740	62478.8	0	27105	12111	11872.4	344002	153867	14547.4	51241.4	0	3738.32	0	0	3836.09	0	35912.4	13992.9	7657.96	0	6860.59	0	35488	17734.6	23346.8	27167.3	17193.5	14585.5	0	12327.4	29581.1	39560.1	34306.9	14108.6	0	0	0	0	0	0	0
COTU-CM-0573	0	0	0	0	0	0	0	0	0	0	0	0	0	0	0	0	0	0	0	0	0	0	0	0	0	0	0	0	0	0	0	0	116734	194699	120354	65634.7	63358.5	59171.3	1.16023e+06	1.08942e+06	54891	24690.1	0	0	0	0	0	0	0
COTU-CM-0574	0	0	0	0	0	0	0	0	0	0	0	0	0	0	0	0	0	0	0	0	0	0	0	0	0	0	0	0	0	0	0	0	0	0	0	0	0	0	23007.5	3043.09	6861.38	3527.16	0	0	0	0	0	0	0
COTU-CM-0575	73334.8	170523	304713	99139.2	274312	126695	244248	290826	197149	82003.4	410360	266532	544994	249319	239306	256445	7273.71	111023	38557.9	4672.9	103015	16218.5	23016.6	24765.2	64642.3	26713.7	76579.6	1621.62	65175.6	107050	7097.59	53203.8	15564.5	13583.6	8596.74	0	15839.6	2465.47	6573.57	0	34306.9	21163	0	0	0	0	1758.53	0	0
COTU-CM-0576	41905.6	38755.3	17247.9	18359.1	32272	9049.64	42477.9	7653.31	7582.64	0	0	9035	0	0	29913.2	11397.6	0	0	0	934.579	10301.5	0	0	7429.55	0	0	0	810.811	0	0	7097.59	1970.51	15564.5	4527.88	0	7292.74	0	2465.47	9860.35	9129.26	82336.5	74070.4	0	0	0	0	0	0	0
COTU-CM-0577	0	0	0	0	0	0	0	0	0	0	0	0	6055.49	0	0	0	0	0	0	0	0	0	0	0	0	0	0	0	3430.3	2817.12	0	0	11673.4	4527.88	4298.37	0	0	4930.94	0	0	89197.9	28217.3	0	0	0	0	0	0	0
COTU-CM-0581	199052	209278	385203	315777	193632	90496.4	148673	99493	690021	339728	198963	85832.5	24222	19787.3	1.42088e+06	501493	36368.5	179345	96394.6	17757	41205.9	20273.2	38360.9	27241.7	351941	73780.6	76579.6	7297.3	0	8451.35	269708	116260	23346.8	4527.88	8596.74	3646.37	23759.4	0	16433.9	33473.9	34306.9	14108.6	0	0	0	0	0	0	0
COTU-CM-0582	0	0	0	0	0	0	0	0	0	0	0	0	48443.9	0	0	0	0	0	0	0	0	0	0	0	0	0	0	0	0	0	0	0	0	0	0	0	0	0	0	0	0	0	0	0	0	0	0	0	0
COTU-CM-0585	0	0	0	0	0	0	0	0	0	0	0	0	0	0	0	0	0	0	0	0	0	0	0	0	0	0	0	0	0	0	0	0	0	4527.88	0	0	0	4930.94	0	33473.9	13722.8	0	0	0	0	0	0	0	0
COTU-CM-0586	0	0	0	0	0	0	0	0	0	0	0	0	0	0	0	0	0	0	0	0	0	0	0	0	0	0	0	0	0	0	0	0	0	0	0	0	0	0	0	0	0	0	0	0	0	11211.7	0	0	0
COTU-CM-0589	0	0	0	0	0	0	0	0	0	0	0	0	0	0	0	0	0	0	0	0	0	0	0	0	0	0	0	0	0	0	0	0	11673.4	9055.76	21491.8	10939.1	15839.6	19723.8	0	15215.4	13722.8	3527.16	0	0	0	0	0	0	0
COTU-CM-0590	10476.4	0	0	0	0	0	0	0	0	0	24870.3	4517.5	0	0	0	0	0	0	0	0	0	0	0	0	0	0	0	0	0	0	0	0	19455.6	13583.6	8596.74	18231.9	0	7396.42	3286.78	6086.17	13722.8	21163	0	0	0	0	0	0	0
COTU-CM-0592	0	0	0	0	0	0	0	0	0	0	0	0	36332.9	0	0	0	0	0	0	0	0	0	0	0	0	0	0	0	0	0	0	0	0	0	0	0	0	0	0	0	0	0	0	0	0	0	0	0	0
COTU-CM-0595	52382	23253.2	0	0	0	0	0	0	0	0	6217.58	0	12111	0	119653	17096.3	7273.71	0	0	0	0	0	0	0	0	0	0	0	0	0	14195.2	3941.02	0	0	0	0	0	0	0	0	0	0	0	0	0	0	0	0	0
COTU-CM-0598	0	0	0	0	0	0	0	0	0	0	0	0	0	0	0	0	0	0	0	0	0	0	0	0	0	0	0	0	0	0	0	0	136189	76973.9	90265.8	61988.3	55438.7	64102.3	0	0	20584.1	38798.8	0	0	0	16817.5	1758.53	1950.08	0
COTU-CM-0599	41905.6	7751.05	0	3671.82	16136	0	63716.8	45919.8	30330.6	11714.8	12435.2	27105	24222	23744.7	14956.6	34192.7	0	0	0	0	0	0	0	4953.03	0	0	0	810.811	6860.59	5634.24	0	3941.02	3891.13	4527.88	0	7292.74	7919.82	2465.47	0	0	48029.6	59961.7	0	0	0	1868.61	0	0	0
COTU-CM-0600	0	0	0	0	0	0	0	0	0	0	0	0	0	0	0	0	0	0	0	0	0	0	0	0	0	0	0	0	0	0	0	0	7782.25	18111.5	0	3646.37	7919.82	7396.42	16433.9	18258.5	6861.38	3527.16	0	0	0	0	0	0	0
COTU-CM-0602	0	0	0	0	0	0	0	0	0	0	0	0	0	0	0	0	0	0	0	0	0	0	0	0	0	0	0	0	0	0	0	0	0	4527.88	8596.74	3646.37	0	2465.47	19720.7	30430.9	13722.8	14108.6	0	0	0	0	0	0	0
COTU-CM-0607	0	23253.2	0	3671.82	32272	0	0	15306.6	0	0	49740.6	22587.5	12111	3957.45	0	5698.78	0	0	0	0	0	0	0	0	0	0	61263.7	810.811	6860.59	0	0	0	42802.4	31695.2	30088.6	14585.5	23759.4	14792.8	39441.4	9129.26	13722.8	0	0	0	0	0	0	0	0
COTU-CM-0608	0	0	0	0	0	0	0	0	0	0	0	0	0	0	0	0	0	0	0	0	0	0	0	0	0	0	0	0	0	0	0	0	7782.25	4527.88	4298.37	0	15839.6	7396.42	0	0	48029.6	63488.9	0	0	0	0	0	0	0
COTU-CM-0613	31429.2	31004.2	5749.3	7343.64	16136	9049.64	392920	520425	0	3904.92	62175.8	49692.5	6055.49	0	14956.6	5698.78	7273.71	8540.23	0	934.579	0	0	34524.8	44577.3	0	0	15315.9	0	3430.3	0	0	0	7782.25	0	25790.2	7292.74	0	2465.47	0	0	48029.6	49380.2	0	0	0	0	0	0	0
COTU-CM-0614	178099	201527	28746.5	33046.4	435673	162893	138053	153066	7582.64	3904.92	739892	365917	435995	336383	29913.2	5698.78	29094.8	281828	9639.46	2803.74	103015	40546.4	23016.6	12382.6	28729.9	2544.16	191449	10540.5	147503	95782	28390.4	3941.02	221794	221866	193427	171379	126717	118343	121611	127810	130366	91706.2	0	12000	0	0	5275.59	0	0
COTU-CM-0615	0	0	0	0	0	0	0	0	0	0	0	0	0	0	0	0	0	0	0	0	0	0	0	0	0	0	0	0	0	0	0	0	42802.4	22639.4	21491.8	32817.3	0	22189.2	32867.8	18258.5	116643	112869	0	0	0	0	0	0	0
COTU-CM-0616	0	0	0	0	0	0	0	0	0	0	0	0	0	0	0	0	0	0	0	0	0	0	0	0	0	0	0	0	0	0	0	0	0	0	12895.1	0	0	0	0	3043.09	6861.38	31744.4	0	0	0	0	0	0	0
COTU-CM-0617	0	0	0	0	0	0	0	0	0	0	0	0	0	0	0	0	0	0	0	0	0	0	0	0	0	0	0	0	0	0	0	0	3891.13	0	0	3646.37	0	0	16433.9	6086.17	13722.8	56434.6	0	0	0	0	0	0	0
COTU-CM-0618	0	0	0	0	0	0	0	0	0	0	0	0	0	0	0	0	0	0	0	0	0	0	0	0	0	0	0	0	0	0	0	0	0	0	0	0	0	0	0	0	0	0	0	0	0	0	0	11700.5	0
COTU-CM-0619	0	0	0	0	0	0	0	0	0	0	0	0	0	0	0	5698.78	0	0	0	0	0	0	0	0	0	0	0	0	0	0	0	0	3.34248e+06	2.67598e+06	3.01316e+06	3.49687e+06	2.87489e+06	2.82543e+06	742813	1.25071e+06	1.13899e+06	1.71067e+06	79342.1	150000	58407.1	72875.9	107270	74103	35365.9
COTU-CM-0620	0	0	0	0	0	0	0	0	0	0	0	0	0	0	0	0	0	0	0	0	0	0	0	0	0	0	0	0	0	0	0	0	0	0	0	0	0	0	0	21301.6	0	0	0	0	0	0	0	0	0
COTU-CM-0621	0	7751.05	0	3671.82	16136	0	286726	244906	0	0	49740.6	27105	0	39574.5	44869.8	11397.6	0	8540.23	0	0	0	0	15344.4	14859.1	0	0	0	810.811	0	0	0	0	0	0	0	0	0	0	0	0	0	0	0	0	0	0	0	0	0
COTU-CM-0622	0	0	0	0	0	0	0	0	0	0	0	0	90832.4	79149	0	0	0	0	0	0	0	0	0	0	0	0	0	0	10290.9	22536.9	0	0	0	0	0	0	0	0	0	0	0	0	0	0	0	0	0	0	0
COTU-CM-0623	0	0	0	0	0	0	0	0	0	0	0	0	0	0	0	0	0	0	0	0	0	0	0	0	0	0	0	0	0	0	0	0	19455.6	0	25790.2	7292.74	15839.6	9861.89	0	3043.09	6861.38	10581.5	0	0	0	0	0	0	0
COTU-CM-0624	83811.2	209278	229972	793113	0	0	169912	344399	0	0	0	0	0	0	0	0	14547.4	179345	28918.4	61682.2	0	0	19180.5	27241.7	0	0	0	0	0	0	0	0	27237.9	36223	12895.1	7292.74	7919.82	9861.89	19720.7	12172.3	0	3527.16	0	0	0	0	0	0	0
COTU-CM-0625	0	0	0	0	0	0	0	0	0	0	0	0	0	0	0	0	0	0	0	0	0	0	0	0	0	0	0	0	0	0	0	0	7782.25	9055.76	4298.37	0	0	14792.8	3286.78	18258.5	0	3527.16	0	0	0	0	0	0	0
COTU-CM-0626	125717	325544	195476	910612	0	0	201770	267866	0	0	0	0	0	0	0	0	7273.71	247667	28918.4	84112.1	0	0	23016.6	17335.6	0	0	0	0	0	0	0	0	73931.4	45278.8	34387	25524.6	31679.3	12327.4	36154.6	18258.5	6861.38	0	0	0	0	0	0	0	0
COTU-CM-0628	0	0	0	0	0	0	435398	191333	68243.8	97623.1	198963	13552.5	145332	221617	0	0	0	8540.23	0	0	0	0	53705.3	17335.6	86189.7	27985.8	145501	1621.62	44593.9	47891	0	0	0	0	0	0	0	0	0	0	6861.38	14108.6	0	0	0	0	0	0	0
COTU-CM-0629	0	7751.05	0	0	0	0	382301	298479	106157	97623.1	136787	18070	48443.9	110809	0	0	0	25620.7	0	0	0	0	69049.7	24765.2	14364.9	30529.9	76579.6	810.811	27442.4	22536.9	0	0	3891.13	0	0	0	0	0	0	3043.09	6861.38	14108.6	0	0	0	0	0	0	0
COTU-CM-0630	0	0	0	0	0	0	10619.5	0	0	0	6217.58	4517.5	0	0	14956.6	0	0	0	0	2803.74	0	0	0	0	0	0	0	810.811	0	0	0	0	7782.25	9055.76	8596.74	3646.37	0	14792.8	6573.57	3043.09	0	0	0	0	0	0	0	0	2357.72
COTU-CM-0631	0	0	0	0	0	0	0	0	0	0	0	0	0	0	0	0	0	0	0	0	0	0	0	0	0	0	0	0	0	0	0	0	3891.13	0	0	3646.37	0	7396.42	9860.35	18258.5	0	3527.16	0	0	0	0	0	0	0
COTU-CM-0632	20952.8	15502.1	0	0	0	0	31858.4	38266.5	0	0	0	9035	18166.5	3957.45	59826.4	5698.78	0	25620.7	0	0	0	0	0	2476.52	0	1272.08	0	0	0	0	0	0	11673.4	22639.4	0	3646.37	0	14792.8	3286.78	27387.8	27445.5	24690.1	0	0	0	0	0	0	0
COTU-CM-0633	0	0	0	0	0	0	0	0	0	0	0	0	0	0	0	0	0	0	0	0	0	0	0	0	0	0	0	0	0	0	0	0	11673.4	4527.88	17193.5	3646.37	0	7396.42	26294.3	9129.26	48029.6	42325.9	0	0	0	1868.61	1758.53	1950.08	0
COTU-CM-0634	0	0	0	0	0	0	0	0	0	0	0	0	42388.4	0	0	0	0	0	0	0	0	0	0	0	0	0	0	0	10290.9	0	0	0	0	0	0	0	0	0	0	0	0	0	0	0	0	0	0	0	0
COTU-CM-0635	408580	15502.1	304713	0	484081	27148.9	615929	61226.5	667273	46859.1	391708	9035	417829	51446.9	224349	22795.1	21821.1	128103	269905	4672.9	164824	20273.2	253182	14859.1	416583	10176.6	84237.6	810.811	92618	30988.3	63878.3	11823.1	3891.13	0	0	0	0	0	3286.78	0	0	0	0	0	0	1868.61	0	0	0
COTU-CM-0636	0	0	0	22030.9	0	0	0	0	0	0	0	0	0	0	0	0	0	0	0	0	0	0	0	0	0	0	0	0	0	0	0	0	0	0	0	0	0	0	0	0	0	0	0	0	0	0	0	0	0
COTU-CM-0637	0	0	0	0	0	0	0	0	0	0	0	0	0	0	0	0	0	0	0	0	0	0	0	0	0	0	0	0	0	0	0	0	0	0	0	0	0	0	0	0	0	0	0	0	0	0	0	11700.5	0
COTU-CM-0638	0	0	0	0	0	0	0	0	0	0	0	0	0	0	0	0	0	0	0	0	0	0	0	0	0	0	0	0	0	0	0	0	0	0	0	0	0	0	0	0	0	0	0	0	0	0	10551.2	0	0
COTU-CM-0639	0	0	0	0	0	0	0	0	0	0	0	0	0	0	0	0	0	0	0	0	0	0	0	0	0	0	0	0	0	0	0	0	400786	421093	270797	149501	205915	135601	552180	222145	1.24191e+06	469112	26447.4	12000	21238.9	5605.84	10551.2	5850.23	40081.3
COTU-CM-0640	0	0	0	0	0	0	0	0	0	0	0	0	0	0	0	0	0	0	0	0	0	0	0	0	0	0	0	0	0	0	0	0	19455.6	13583.6	8596.74	14585.5	15839.6	12327.4	26294.3	12172.3	0	10581.5	0	0	0	0	0	0	0
COTU-CM-0641	0	0	0	0	0	0	0	0	0	0	0	0	0	0	0	0	0	0	0	0	0	0	0	0	0	0	0	0	0	0	0	0	38911.3	13583.6	12895.1	18231.9	0	9861.89	256369	51732.4	116643	38798.8	17631.6	6000	10619.5	1868.61	0	0	14146.3
COTU-CM-0642	0	0	0	0	0	0	0	0	0	0	0	0	0	0	0	0	0	0	0	0	0	0	0	0	0	0	0	0	0	0	0	0	105060	140364	107459	40110.1	23759.4	19723.8	460150	18258.5	41168.3	0	44078.9	24000	10619.5	0	5275.59	1950.08	63658.5
COTU-CM-0643	0	0	0	0	0	0	0	0	0	0	0	0	0	0	0	0	0	0	0	0	0	0	0	0	0	0	0	0	0	0	0	0	73931.4	27167.3	42983.7	58341.9	71278.3	46844	496304	51732.4	20584.1	17635.8	0	18000	0	0	3517.06	0	33008.1
COTU-CM-0644	0	0	0	0	0	0	0	0	0	0	0	0	0	0	0	0	0	0	0	0	0	0	0	0	0	0	0	0	0	0	0	0	0	4527.88	4298.37	0	0	2465.47	0	3043.09	6861.38	0	0	0	0	0	0	0	0
COTU-CM-0645	0	0	0	0	0	0	0	0	0	0	0	0	0	0	0	0	0	0	0	0	0	0	0	0	0	0	0	0	0	0	0	0	11673.4	31695.2	17193.5	36463.7	23759.4	22189.2	49301.8	15215.4	20584.1	155195	0	0	0	0	0	0	0
COTU-CM-0649	0	0	0	0	0	0	0	0	0	0	0	0	0	0	0	0	0	0	0	0	0	0	0	0	0	0	0	0	0	0	0	0	3891.13	0	0	3646.37	15839.6	7396.42	13147.1	15215.4	34306.9	63488.9	0	0	0	0	0	0	0
COTU-CM-0650	0	0	0	0	0	0	0	0	0	0	0	0	0	0	0	0	0	0	0	0	0	0	0	0	0	0	0	0	0	0	0	0	3891.13	4527.88	8596.74	0	0	2465.47	0	6086.17	6861.38	24690.1	0	0	0	0	0	0	0
COTU-CM-0651	0	0	0	0	0	0	0	0	0	0	0	0	0	0	0	0	0	0	0	0	0	0	0	0	0	0	0	0	0	0	0	0	3891.13	4527.88	0	7292.74	0	9861.89	16433.9	3043.09	0	17635.8	0	0	0	0	0	0	0
COTU-CM-0652	0	0	0	0	0	0	0	0	0	0	0	0	0	0	0	0	0	0	0	0	0	0	0	0	0	0	0	0	0	0	0	0	0	0	0	0	0	0	0	0	0	0	0	0	0	0	0	0	0
COTU-CM-0653	0	0	0	0	0	0	0	7653.31	0	0	0	0	6055.49	0	0	0	0	0	0	934.579	0	0	0	0	0	0	0	0	3430.3	2817.12	0	1970.51	23346.8	27167.3	8596.74	10939.1	15839.6	19723.8	9860.35	0	0	0	0	0	0	3737.23	0	1950.08	0
COTU-CM-0654	0	0	0	0	0	0	0	15306.6	0	0	0	0	0	0	14956.6	0	0	0	0	1869.16	0	0	0	0	0	1272.08	0	0	0	0	0	0	58366.9	54334.5	42983.7	47402.8	31679.3	29585.7	9860.35	6086.17	0	0	8815.79	0	0	3737.23	3517.06	5850.23	0
COTU-CM-0655	0	0	0	0	0	0	0	0	0	0	0	0	0	0	0	0	0	0	0	0	0	0	0	0	0	0	0	0	0	0	0	0	23346.8	49806.7	21491.8	10939.1	15839.6	12327.4	9860.35	0	0	0	0	0	5309.73	0	1758.53	0	0
COTU-CM-0656	0	0	0	0	0	0	0	0	0	0	0	0	0	0	0	0	0	0	0	0	0	0	0	0	0	0	0	0	0	0	0	0	3891.13	9055.76	8596.74	10939.1	7919.82	2465.47	75596	103465	542049	694851	0	0	0	0	0	0	0
COTU-CM-0657	0	0	0	0	0	0	0	0	0	0	0	0	0	0	0	0	0	0	0	0	0	0	0	0	0	0	0	0	0	0	0	0	0	0	8596.74	0	0	0	36154.6	33473.9	0	0	0	0	0	0	0	0	0
COTU-CM-0658	0	0	0	0	0	0	0	0	0	0	0	0	0	0	0	0	0	0	0	0	0	0	0	0	0	0	0	0	0	0	0	0	0	0	4298.37	0	7919.82	0	55875.3	24344.7	0	0	0	0	0	0	0	0	0
COTU-CM-0659	0	0	0	0	0	0	0	0	0	0	0	0	0	0	0	0	0	0	0	0	0	0	0	0	0	0	0	0	0	0	0	0	0	9055.76	0	3646.37	0	4930.94	75596	24344.7	0	0	0	0	0	0	0	0	0
COTU-CM-0660	0	0	0	0	0	0	0	0	0	0	0	31622.5	0	0	0	0	0	0	0	0	0	4054.64	0	0	0	0	0	0	0	0	0	0	0	0	0	0	0	0	0	0	0	0	0	0	0	0	0	0	0
COTU-CM-0661	2.80767e+06	2759375	1.47182e+06	558117	6.55122e+06	2.10857e+06	21238.9	7653.31	1.52411e+06	519355	2.00828e+06	1.45463e+06	1.00521e+06	894384	6.64073e+06	894708	363685	1.40914e+06	240987	58878.5	1.20527e+06	275715	3836.09	4953.03	689517	92861.9	444162	40540.5	569429	312700	567807	232520	11673.4	4527.88	12895.1	3646.37	0	0	3286.78	0	6861.38	0	0	0	0	0	0	0	0
COTU-CM-0662	0	0	0	0	0	0	0	0	0	0	0	0	0	0	0	0	0	0	0	0	0	0	0	0	0	0	0	0	0	0	0	0	54475.8	40750.9	34387	36463.7	47518.9	46844	0	0	82336.5	201048	0	0	0	0	0	0	0
COTU-CM-0663	10476.4	23253.2	0	7343.64	112952	18099.3	0	7653.31	0	7809.85	0	0	6055.49	7914.9	29913.2	0	14547.4	8540.23	0	1869.16	0	0	0	0	7182.47	0	7657.96	0	3430.3	8451.35	0	1970.51	7782.25	4527.88	21491.8	3646.37	7919.82	4930.94	26294.3	12172.3	6861.38	10581.5	0	0	0	0	0	0	0
COTU-CM-0664	0	0	5749.3	0	0	0	21238.9	0	0	3904.92	6217.58	4517.5	0	3957.45	0	0	0	8540.23	9639.46	0	0	0	0	0	0	2544.16	0	0	0	0	0	0	70040.3	63390.3	60177.2	32817.3	23759.4	29585.7	52588.5	48689.4	54891	151668	0	0	0	0	0	0	0
COTU-CM-0665	0	0	0	0	0	0	0	0	0	0	0	0	0	0	0	0	0	0	0	0	0	0	0	0	0	0	0	0	0	0	0	0	23346.8	4527.88	8596.74	3646.37	0	4930.94	9860.35	6086.17	0	7054.32	0	0	0	0	0	0	2357.72
COTU-CM-0666	0	0	0	0	0	0	0	0	0	0	0	0	0	0	0	0	0	0	0	0	0	0	0	0	0	0	0	0	0	0	0	0	7782.25	13583.6	8596.74	3646.37	0	4930.94	147905	109551	27445.5	52907.4	0	0	0	0	1758.53	0	0
COTU-CM-0667	0	0	0	0	0	0	0	0	0	0	0	0	0	0	0	0	0	0	0	0	0	0	0	0	0	0	0	0	0	0	0	0	7782.25	4527.88	8596.74	3646.37	0	4930.94	46015	76077.1	13722.8	42325.9	0	0	0	1868.61	0	0	0
COTU-CM-0668	0	0	0	0	0	0	0	0	0	0	0	0	0	0	0	0	0	0	0	0	0	0	0	0	0	0	0	0	0	0	0	0	0	9055.76	4298.37	0	0	0	88743.2	45646.3	20584.1	24690.1	0	0	0	0	0	0	0
COTU-CM-0669	0	0	0	0	0	0	0	0	7582.64	0	0	0	0	0	0	0	0	0	0	0	0	0	0	0	0	0	0	0	0	0	0	11823.1	0	0	0	0	0	0	0	0	0	0	0	0	0	0	0	0	0
COTU-CM-0670	555249	193776	540434	319448	806801	307688	732743	482158	121322	70288.6	478754	307190	211942	43532	673047	1.18535e+06	72737.1	392851	144592	129907	226632	141912	168788	96584.1	71824.7	31802	245055	34054.1	48024.1	39439.7	156147	563566	0	0	0	0	0	0	0	0	0	0	0	0	0	0	0	0	0
COTU-CM-0671	0	0	0	0	0	0	0	0	0	0	0	0	0	0	0	0	0	0	0	0	0	0	0	0	0	22897.4	0	0	0	0	0	0	0	0	0	0	0	0	0	0	0	0	0	0	0	0	0	0	0
COTU-CM-0672	52382	38755.3	22997.2	25702.8	16136	27148.9	42477.9	61226.5	37913.2	11714.8	24870.3	63245	36332.9	47489.4	74783	28493.9	21821.1	76862.1	0	2803.74	10301.5	4054.64	7672.19	7429.55	28729.9	1272.08	53605.7	810.811	6860.59	28171.2	7097.59	3941.02	0	0	0	7292.74	0	0	3286.78	0	0	7054.32	0	0	0	0	0	0	0
COTU-CM-0673	0	0	0	0	0	0	0	0	0	0	0	0	0	0	0	0	0	0	0	0	0	0	0	0	0	0	0	0	0	0	0	0	54475.8	18111.5	25790.2	40110.1	15839.6	27120.2	3286.78	0	68613.8	28217.3	0	0	0	1868.61	0	1950.08	0
COTU-CM-0677	0	15502.1	5749.3	7343.64	0	0	0	0	0	0	0	0	0	0	0	0	0	0	0	2803.74	0	0	0	0	0	0	0	0	0	0	0	0	3891.13	9055.76	4298.37	7292.74	15839.6	14792.8	98603.5	139982	13722.8	84651.8	0	0	0	0	1758.53	1950.08	0
COTU-CM-0678	0	0	0	0	0	0	0	0	0	0	0	0	0	0	0	0	0	0	0	0	0	0	0	0	0	0	0	0	0	0	0	0	0	0	0	0	0	0	23007.5	12172.3	13722.8	3527.16	0	0	0	0	0	0	0
COTU-CM-0679	0	0	0	0	0	0	0	0	0	0	0	0	0	0	0	0	0	0	0	0	0	0	0	0	0	0	0	0	0	0	0	0	15564.5	4527.88	8596.74	7292.74	23759.4	2465.47	29581.1	3043.09	0	0	0	0	0	0	0	0	0
COTU-CM-0680	0	0	0	0	0	0	0	0	0	0	0	0	0	0	0	0	0	0	0	0	0	0	0	0	0	0	0	0	0	0	0	0	3891.13	4527.88	0	0	0	7396.42	32867.8	33473.9	6861.38	42325.9	0	0	0	0	0	0	0
COTU-CM-0683	0	0	0	0	0	0	0	0	0	0	0	0	0	0	0	0	0	0	0	0	0	0	0	0	0	0	0	0	0	0	0	0	0	4527.88	0	0	0	2465.47	75596	45646.3	54891	14108.6	0	0	0	0	3517.06	0	0
COTU-CM-0684	0	0	0	0	0	0	0	0	0	0	0	0	0	0	0	0	0	0	0	0	0	0	0	0	0	0	0	0	0	0	0	0	3891.13	0	17193.5	0	7919.82	0	118324	79120.2	41168.3	35271.6	0	0	0	0	0	0	2357.72
COTU-CM-0685	0	0	0	0	0	0	0	0	0	0	0	0	0	0	0	0	0	0	0	0	0	0	0	0	0	0	0	0	0	0	0	0	3891.13	0	4298.37	0	0	2465.47	95316.7	54775.5	34306.9	38798.8	0	0	0	0	0	0	0
COTU-CM-0686	0	0	0	0	0	0	0	0	0	0	0	0	0	0	0	0	0	0	0	0	0	0	0	0	0	0	0	0	0	0	0	0	0	0	0	0	0	0	52588.5	24344.7	27445.5	31744.4	0	0	0	0	0	0	0
COTU-CM-0687	0	0	0	0	0	0	0	45919.8	0	0	0	0	0	0	0	0	0	0	0	0	0	0	0	0	0	0	0	0	0	0	0	0	0	0	0	0	0	0	0	0	0	0	0	0	0	0	0	0	0
COTU-CM-0689	73334.8	0	114986	3671.82	64544.1	0	21238.9	15306.6	22747.9	3904.92	31087.9	0	12111	11872.4	14956.6	5698.78	0	34160.9	38557.9	0	0	0	7672.19	0	0	0	53605.7	0	6860.59	5634.24	0	0	0	0	0	0	0	0	0	0	0	0	0	0	0	0	0	0	0
COTU-CM-0691	0	0	0	0	0	0	0	0	0	0	0	0	0	0	0	0	0	0	0	0	0	0	0	0	93372.2	0	0	0	0	0	0	0	0	0	0	0	0	0	0	0	0	0	0	0	0	0	0	0	0
COTU-CM-0692	0	7751.05	0	14687.3	0	0	21238.9	7653.31	0	0	0	0	0	0	0	0	7273.71	25620.7	0	0	0	0	3836.09	2476.52	0	0	0	0	0	0	0	0	3891.13	4527.88	12895.1	3646.37	0	7396.42	13147.1	18258.5	6861.38	10581.5	26447.4	6000	10619.5	3737.23	0	0	2357.72
COTU-CM-0693	20952.8	0	5749.3	0	32272	9049.64	0	22959.9	0	0	12435.2	22587.5	24222	23744.7	0	11397.6	0	8540.23	0	934.579	0	4054.64	7672.19	0	7182.47	0	0	0	3430.3	2817.12	0	0	19455.6	4527.88	8596.74	14585.5	7919.82	9861.89	9860.35	12172.3	6861.38	14108.6	0	6000	5309.73	1868.61	0	3900.16	4715.45
COTU-CM-0694	0	0	0	0	0	0	0	0	0	0	0	0	0	0	0	0	0	0	0	0	0	0	0	0	0	0	0	0	0	0	0	0	0	9055.76	4298.37	3646.37	0	0	39441.4	12172.3	20584.1	21163	0	0	0	0	0	3900.16	2357.72
COTU-CM-0695	0	7751.05	22997.2	3671.82	0	0	0	22959.9	0	0	0	0	0	0	0	0	7273.71	0	48197.3	7476.64	0	0	0	0	0	0	0	0	0	0	0	0	0	0	0	0	0	0	0	0	0	0	0	0	0	0	0	0	0
COTU-CM-0696	0	0	0	0	0	0	0	0	0	0	0	0	0	0	0	0	0	0	0	0	0	0	0	0	0	0	0	0	0	0	0	0	19455.6	9055.76	17193.5	18231.9	23759.4	12327.4	19720.7	39560.1	13722.8	21163	8815.79	0	0	0	0	0	2357.72
COTU-CM-0697	0	0	0	0	0	0	0	0	0	0	0	0	0	0	0	0	0	0	9639.46	6542.06	10301.5	0	0	0	0	0	0	0	0	0	0	0	7782.25	0	8596.74	0	0	2465.47	3286.78	3043.09	0	7054.32	0	0	0	0	0	0	0
COTU-CM-0698	0	0	0	0	0	0	0	0	0	0	0	0	0	0	0	0	0	0	0	0	0	0	0	0	0	0	0	0	0	0	0	0	0	0	0	0	0	0	26294.3	12172.3	41168.3	7054.32	0	0	0	0	0	1950.08	0
COTU-CM-0699	0	0	0	0	0	0	0	0	0	0	0	0	0	0	0	0	0	0	0	0	0	0	0	0	0	0	0	0	0	0	0	0	7782.25	4527.88	21491.8	3646.37	31679.3	0	9860.35	6086.17	13722.8	7054.32	0	0	0	0	3517.06	0	0
COTU-CM-0700	0	0	0	0	0	0	0	0	0	0	0	0	0	0	0	0	0	0	0	0	0	0	0	0	0	0	0	0	0	0	0	0	27237.9	9055.76	8596.74	0	0	2465.47	19720.7	3043.09	20584.1	0	0	6000	0	1868.61	1758.53	0	2357.72
COTU-CM-0701	0	0	0	0	0	0	0	0	0	0	0	0	0	0	0	0	0	0	0	0	0	0	0	0	0	0	0	0	0	0	0	0	23346.8	4527.88	17193.5	3646.37	0	0	39441.4	6086.17	34306.9	14108.6	0	0	0	0	0	7800.31	0
COTU-CM-0702	0	0	0	0	0	0	0	0	0	0	0	0	0	0	0	0	0	0	0	0	0	0	0	0	0	0	0	0	0	0	0	0	0	0	0	0	0	0	3286.78	6086.17	0	35271.6	0	0	0	0	0	0	0
COTU-CM-0703	0	0	0	0	0	0	0	0	0	0	0	0	0	0	0	0	0	0	0	0	0	0	0	0	0	0	0	0	0	0	0	0	0	0	0	0	0	0	0	0	27445.5	28217.3	0	0	0	0	0	0	0
COTU-CM-0705	0	0	0	0	0	0	0	0	0	0	0	0	0	0	0	0	0	0	0	0	0	0	0	0	0	0	0	0	0	0	0	0	3891.13	9055.76	12895.1	21878.2	0	9861.89	98603.5	203887	0	0	0	0	0	0	0	0	0
COTU-CM-0706	0	0	0	0	0	0	0	0	0	0	0	0	0	0	0	0	0	0	0	0	0	0	0	0	0	0	0	0	0	0	0	0	7782.25	13583.6	0	7292.74	0	7396.42	105177	176499	0	7054.32	0	0	0	0	0	0	0
COTU-CM-0707	0	0	0	0	0	0	0	0	0	0	0	0	0	0	0	0	0	0	0	0	0	0	0	0	0	0	0	0	0	0	0	0	31129	9055.76	8596.74	10939.1	0	2465.47	121611	170413	0	17635.8	0	0	0	0	0	0	0
COTU-CM-0709	0	0	0	0	0	0	0	0	0	0	0	0	0	0	0	0	0	0	0	0	0	0	0	0	0	0	0	0	0	0	0	0	0	0	8596.74	0	0	0	26294.3	63904.8	13722.8	123451	0	0	0	0	0	0	0
COTU-CM-0710	0	0	0	0	0	0	0	0	0	0	0	0	0	0	0	0	0	0	0	0	0	0	0	0	0	0	0	0	0	0	0	0	7782.25	0	0	0	7919.82	0	13147.1	12172.3	13722.8	102288	0	0	0	0	0	0	0
COTU-CM-0711	0	0	0	0	0	0	0	0	0	0	0	0	0	0	0	0	0	0	0	0	0	0	0	0	0	0	0	0	0	0	0	0	0	0	0	3646.37	0	0	9860.35	6086.17	41168.3	52907.4	0	0	0	0	0	0	0
COTU-CM-0712	0	0	0	0	0	0	0	0	0	0	0	0	0	0	0	0	0	0	0	0	0	0	0	0	0	0	0	0	0	0	0	0	0	0	0	0	0	4930.94	9860.35	6086.17	6861.38	59961.7	0	0	0	0	0	0	0
COTU-CM-0713	62858.4	54257.4	137983	62421	177496	27148.9	329204	252559	197149	15619.7	180310	126490	236164	59361.8	119653	347626	0	59781.6	28918.4	2803.74	30904.4	0	19180.5	17335.6	57459.8	13992.9	7657.96	1621.62	13721.2	5634.24	0	15764.1	31129	45278.8	30088.6	14585.5	39599.1	24654.7	0	0	0	21163	0	0	0	0	0	0	0
COTU-CM-0715	0	0	0	0	0	0	0	0	0	0	0	0	0	0	0	0	0	0	0	0	0	0	0	0	0	0	0	0	0	0	0	0	15564.5	9055.76	8596.74	7292.74	0	4930.94	95316.7	155197	0	3527.16	0	0	0	0	0	0	0
COTU-CM-0716	0	0	0	0	0	0	0	0	0	0	0	0	0	0	0	0	0	0	0	0	0	0	0	0	0	0	0	0	0	0	0	0	11673.4	4527.88	12895.1	10939.1	23759.4	9861.89	72309.2	170413	0	10581.5	0	0	0	0	0	0	0
COTU-CM-0725	0	0	0	0	0	0	0	0	0	0	0	0	0	0	0	0	0	0	0	0	0	0	0	0	0	0	0	0	0	0	0	0	0	0	0	0	0	0	23007.5	0	13722.8	21163	0	0	0	0	0	0	0
COTU-CM-0726	0	0	0	0	0	0	0	0	0	0	0	0	0	0	0	0	0	0	0	0	0	0	0	0	0	0	0	0	0	0	0	0	416350	547873	459926	164087	134637	118343	190633	39560.1	109782	130505	8815.79	0	5309.73	1868.61	7034.12	1950.08	0
COTU-CM-0727	0	0	0	0	0	0	0	0	0	0	0	0	0	0	0	0	0	0	0	0	0	0	0	0	0	0	0	0	0	0	0	0	0	0	0	0	0	0	23007.5	51732.4	27445.5	70543.2	0	0	0	0	0	0	0
COTU-CM-0728	0	0	0	0	0	0	0	0	0	0	0	0	0	0	0	0	0	0	0	0	0	0	0	0	0	0	0	0	0	0	0	0	0	0	0	3646.37	0	2465.47	42728.2	57818.6	0	0	0	0	0	0	0	0	0
COTU-CM-0731	0	0	0	0	0	0	1.24248e+06	1.10208e+06	0	0	0	0	0	0	0	0	0	0	0	0	0	0	168788	141161	0	0	0	0	0	0	0	0	0	0	0	0	0	0	0	0	0	0	0	0	0	0	0	0	0
COTU-CM-0732	0	0	0	0	0	0	0	0	0	0	0	0	0	0	0	0	0	0	0	0	0	0	0	0	0	0	0	0	0	0	0	0	23346.8	18111.5	4298.37	7292.74	7919.82	2465.47	39441.4	73034	27445.5	35271.6	0	6000	0	0	0	0	0
COTU-CM-0733	0	0	0	0	0	0	0	0	0	0	12435.2	9035	0	0	0	0	0	0	0	0	0	0	0	0	0	0	7657.96	0	0	0	0	0	7782.25	9055.76	21491.8	18231.9	0	4930.94	16433.9	45646.3	20584.1	24690.1	0	0	0	7474.45	0	0	0
COTU-CM-0734	0	0	0	0	0	0	0	0	0	0	24870.3	49692.5	0	0	0	0	0	0	0	0	0	0	0	0	0	0	7657.96	0	0	0	0	0	0	18111.5	4298.37	7292.74	0	2465.47	69022.5	66947.9	48029.6	52907.4	0	0	0	0	0	0	0
COTU-CM-0735	0	0	0	0	0	0	0	7653.31	0	0	0	0	0	0	0	0	0	34160.9	0	0	0	4054.64	0	4953.03	0	0	0	0	0	0	0	0	3891.13	0	12895.1	0	0	0	26294.3	12172.3	0	0	0	0	0	0	0	0	0
COTU-CM-0736	0	0	0	0	0	0	0	0	0	0	0	0	0	0	0	0	0	0	0	0	0	0	0	0	0	0	0	0	0	0	0	0	0	0	0	0	0	0	19720.7	0	6861.38	0	0	0	0	0	0	0	0
COTU-CM-0737	0	0	0	0	0	0	0	0	0	0	0	0	0	0	0	0	0	0	0	0	0	0	0	0	0	0	0	0	0	0	0	0	0	0	0	0	0	0	6573.57	9129.26	54891	148141	0	0	0	0	0	0	0
COTU-CM-0738	0	0	0	0	0	0	0	0	0	0	0	0	0	0	0	0	0	0	0	934.579	0	0	0	0	0	0	0	0	0	0	0	0	42802.4	9055.76	21491.8	10939.1	0	7396.42	9860.35	12172.3	0	14108.6	0	0	5309.73	0	0	0	0
COTU-CM-0739	20952.8	15502.1	0	0	0	0	21238.9	7653.31	0	0	0	0	0	0	0	0	0	25620.7	0	0	10301.5	0	7672.19	19812.1	0	0	0	0	0	0	0	0	3891.13	0	4298.37	10939.1	0	2465.47	52588.5	66947.9	0	0	0	0	0	0	0	0	0
COTU-CM-0740	0	7751.05	0	0	16136	9049.64	0	0	15165.3	0	0	0	18166.5	0	14956.6	0	0	0	0	0	0	0	0	0	0	0	0	0	0	0	0	0	3891.13	9055.76	4298.37	0	7919.82	0	13147.1	6086.17	27445.5	38798.8	0	0	0	0	0	0	0
COTU-CM-0741	0	0	0	0	0	0	0	0	0	0	0	0	0	0	0	0	0	0	0	0	0	0	0	0	0	0	0	0	0	0	0	0	27237.9	31695.2	25790.2	21878.2	15839.6	7396.42	223501	103465	96059.3	116396	8815.79	0	0	0	0	1950.08	4715.45
COTU-CM-0742	0	0	0	0	0	0	0	0	0	0	0	0	0	0	0	0	0	0	0	0	0	0	0	0	0	0	0	0	0	0	0	0	27237.9	72446.1	38685.3	21878.2	15839.6	14792.8	0	0	0	0	0	0	0	0	0	0	0
COTU-CM-0746	0	0	0	0	0	0	0	0	0	0	0	0	0	0	0	0	0	0	0	0	0	0	0	0	0	0	0	0	0	0	0	0	0	0	4298.37	0	0	0	335252	395601	41168.3	42325.9	0	0	0	0	1758.53	0	2357.72
COTU-CM-0747	0	0	0	0	0	0	0	0	0	0	0	0	0	0	0	0	0	0	0	0	0	0	0	0	0	0	0	0	0	0	0	0	23346.8	0	0	0	7919.82	17258.3	6573.57	3043.09	13722.8	10581.5	0	6000	0	0	0	0	2357.72
COTU-CM-0748	0	0	0	0	0	0	0	0	0	0	0	0	0	0	0	0	0	0	0	0	0	0	0	0	0	0	0	0	0	0	0	0	112843	163004	81669	61988.3	71278.3	98618.9	3286.78	12172.3	75475.1	74070.4	8815.79	0	5309.73	0	1758.53	0	0
COTU-CM-0749	0	0	0	0	0	0	0	0	0	0	0	0	0	0	0	0	0	0	0	0	0	0	0	0	0	0	0	0	0	0	0	0	19455.6	4527.88	0	21878.2	7919.82	4930.94	0	3043.09	102921	42325.9	0	0	0	1868.61	0	0	0
COTU-CM-0750	0	0	17247.9	0	16136	9049.64	21238.9	22959.9	0	0	43523.1	18070	12111	3957.45	0	5698.78	0	0	0	0	0	0	0	2476.52	0	0	7657.96	810.811	0	0	0	0	3891.13	0	12895.1	3646.37	0	7396.42	0	3043.09	6861.38	0	0	0	0	0	0	0	0
COTU-CM-0751	20952.8	7751.05	5749.3	0	0	0	0	22959.9	22747.9	7809.85	55958.2	4517.5	0	0	0	17096.3	0	8540.23	0	0	0	0	0	0	0	1272.08	0	0	0	5634.24	0	0	0	0	0	0	0	0	0	0	0	0	0	0	0	0	0	0	0
COTU-CM-0752	31429.2	23253.2	51743.7	47733.7	354992	90496.4	42477.9	38266.5	30330.6	11714.8	24870.3	4517.5	139276	142468	0	0	0	34160.9	0	1869.16	51507.4	4054.64	0	12382.6	7182.47	1272.08	0	0	17151.5	16902.7	7097.59	0	15564.5	4527.88	0	3646.37	0	2465.47	52588.5	21301.6	20584.1	10581.5	0	0	0	0	0	0	0
COTU-CM-0753	31429.2	15502.1	17247.9	3671.82	32272	0	10619.5	0	15165.3	0	6217.58	4517.5	54499.4	11872.4	0	5698.78	7273.71	8540.23	0	0	0	0	3836.09	4953.03	7182.47	0	7657.96	0	0	0	7097.59	0	11673.4	22639.4	25790.2	10939.1	39599.1	12327.4	13147.1	12172.3	20584.1	35271.6	0	0	5309.73	0	0	0	0
COTU-CM-0754	20952.8	0	11498.6	14687.3	16136	9049.64	10619.5	15306.6	7582.64	0	43523.1	27105	18166.5	0	14956.6	5698.78	0	8540.23	0	934.579	20602.9	0	3836.09	0	0	1272.08	0	0	3430.3	8451.35	7097.59	0	7782.25	27167.3	12895.1	14585.5	15839.6	12327.4	6573.57	0	13722.8	7054.32	0	0	0	0	0	0	0
COTU-CM-0755	0	0	0	3671.82	0	0	0	0	0	23429.5	0	0	0	0	0	0	0	0	0	0	0	0	0	0	0	0	0	0	0	0	0	0	0	0	0	0	0	0	0	0	0	0	0	0	0	0	0	0	0
COTU-CM-0757	0	0	0	0	0	0	0	0	0	0	0	0	0	0	0	0	0	0	0	0	0	0	0	0	0	0	0	0	0	0	0	13793.6	0	0	0	0	0	0	0	0	0	0	0	0	0	0	0	0	0
COTU-CM-0758	0	0	5749.3	0	0	0	10619.5	15306.6	0	0	24870.3	0	0	3957.45	0	0	0	0	0	934.579	0	0	0	0	0	0	0	0	3430.3	0	0	0	0	27167.3	17193.5	10939.1	0	2465.47	19720.7	9129.26	27445.5	31744.4	0	0	0	0	0	0	0
COTU-CM-0759	0	0	0	0	0	0	0	0	0	0	0	0	0	0	89739.6	0	0	0	0	0	0	0	0	0	0	0	0	0	0	0	0	0	0	0	0	0	0	0	0	0	0	0	0	0	0	0	0	0	0
COTU-CM-0761	0	0	0	0	0	0	0	0	0	0	0	0	0	0	0	0	0	0	0	0	0	0	0	0	0	0	0	0	0	0	0	0	23346.8	36223	38685.3	21878.2	55438.7	14792.8	55875.3	48689.4	13722.8	10581.5	0	0	0	0	0	0	0
COTU-CM-0762	0	0	0	0	0	0	0	0	0	0	0	0	0	0	0	0	0	0	0	0	0	0	0	0	0	0	0	0	0	0	0	0	11673.4	0	8596.74	0	0	4930.94	0	0	150950	45853.1	0	0	0	0	0	0	0
COTU-CM-0763	10476.4	15502.1	0	0	0	0	21238.9	15306.6	0	0	18652.7	36140	0	0	0	0	0	17080.5	0	0	0	0	0	0	0	0	0	0	0	0	0	0	0	0	0	0	0	0	0	0	0	0	0	0	0	0	0	0	0
COTU-CM-0764	20952.8	0	5749.3	7343.64	80680.1	18099.3	0	0	7582.64	3904.92	31087.9	185217	12111	0	44869.8	17096.3	0	0	0	1869.16	10301.5	0	0	0	0	1272.08	0	0	0	0	0	0	3891.13	4527.88	4298.37	3646.37	0	4930.94	6573.57	3043.09	0	0	0	0	0	0	0	0	0
COTU-CM-0765	52382	155021	22997.2	44061.9	32272	36198.5	63716.8	114800	0	0	192745	40657.5	133221	23744.7	104696	34192.7	0	8540.23	19278.9	11215	20602.9	0	11508.3	12382.6	0	0	15315.9	0	3430.3	8451.35	0	0	0	0	8596.74	3646.37	0	0	0	6086.17	0	21163	0	0	0	0	0	0	0
COTU-CM-0766	20952.8	23253.2	0	11015.5	0	0	10619.5	30613.2	0	0	6217.58	13552.5	6055.49	11872.4	29913.2	22795.1	0	0	0	7476.64	0	0	0	0	0	0	15315.9	0	0	0	0	1970.51	0	4527.88	0	0	0	0	0	12172.3	6861.38	7054.32	0	0	0	0	0	0	0
COTU-CM-0767	41905.6	23253.2	166730	80780.1	193632	45248.2	21238.9	30613.2	83409.1	50764	12435.2	0	90832.4	27702.2	134609	45590.2	0	25620.7	19278.9	0	20602.9	4054.64	0	2476.52	14364.9	3816.24	0	0	3430.3	5634.24	0	3941.02	3891.13	13583.6	12895.1	14585.5	7919.82	2465.47	19720.7	12172.3	6861.38	24690.1	0	0	0	0	0	1950.08	0
COTU-CM-0768	0	0	0	0	0	0	0	0	0	0	0	0	0	0	0	0	0	0	0	0	0	0	0	0	0	0	0	0	0	0	0	0	77822.5	40750.9	42983.7	21878.2	31679.3	46844	0	12172.3	0	0	0	0	0	0	0	0	0
COTU-CM-0769	0	0	0	0	0	0	0	0	0	0	0	0	0	0	0	0	0	0	0	0	0	0	0	0	0	0	0	0	0	0	0	0	249032	153948	120354	127623	31679.3	66567.7	752673	413860	487158	204575	0	0	0	7474.45	1758.53	3900.16	2357.72
COTU-CM-0770	0	0	0	0	0	0	0	0	0	0	0	0	0	0	0	0	0	0	0	0	0	0	0	0	0	0	0	0	0	0	0	0	73931.4	58862.4	77370.7	54695.6	23759.4	27120.2	811836	465592	0	3527.16	0	0	5309.73	3737.23	0	0	0
COTU-CM-0773	0	0	0	0	0	0	0	0	0	0	0	0	0	0	89739.6	0	0	0	0	0	0	0	0	0	0	0	0	0	0	0	0	0	0	0	0	0	0	0	0	0	0	0	0	0	0	0	0	0	0
COTU-CM-0774	0	0	5749.3	0	16136	9049.64	0	0	0	0	0	0	18166.5	0	104696	5698.78	0	0	0	0	20602.9	0	0	0	0	0	0	26756.8	3430.3	0	7097.59	0	0	0	0	0	0	0	0	0	6861.38	0	0	0	0	0	0	0	0
COTU-CM-0775	0	0	0	0	0	0	0	0	0	0	0	0	0	0	0	0	0	0	0	0	0	0	0	0	0	0	0	0	0	0	0	0	7782.25	9055.76	4298.37	0	0	2465.47	0	0	0	10581.5	8815.79	0	0	0	1758.53	0	0
COTU-CM-0776	0	0	0	0	0	0	0	0	0	0	0	0	0	0	0	0	0	0	0	0	0	0	0	0	0	0	0	0	0	0	0	0	3891.13	13583.6	12895.1	14585.5	15839.6	4930.94	13147.1	0	34306.9	10581.5	8815.79	0	0	0	0	0	0
COTU-CM-0777	0	0	0	0	0	0	0	0	0	0	0	0	0	0	0	0	0	0	0	0	0	0	0	0	0	0	0	0	0	0	0	0	15564.5	27167.3	12895.1	14585.5	7919.82	4930.94	3286.78	0	41168.3	10581.5	0	0	5309.73	0	0	0	7073.17
COTU-CM-0778	0	0	0	0	0	0	0	0	0	0	0	0	0	0	0	0	0	0	0	0	0	0	0	0	0	0	0	0	0	0	0	0	7782.25	4527.88	8596.74	0	7919.82	2465.47	6573.57	0	0	17635.8	0	0	0	0	0	0	0
COTU-CM-0779	0	0	0	0	0	0	0	0	0	0	0	0	0	0	0	0	0	0	0	0	0	0	0	0	0	0	0	0	0	0	0	0	0	0	0	0	0	0	32867.8	9129.26	6861.38	21163	0	0	0	0	0	0	2357.72
COTU-CM-0780	0	0	0	0	0	0	0	0	0	0	0	0	0	0	0	0	0	0	0	0	0	0	0	0	0	0	0	0	0	0	0	0	0	0	0	0	0	0	46015	6086.17	6861.38	0	0	0	0	0	0	0	18861.8
COTU-CM-0781	0	0	0	0	0	0	0	0	0	0	0	0	0	0	0	0	0	0	0	0	0	0	0	0	0	0	0	0	0	0	0	0	0	0	0	0	0	0	9860.35	3043.09	34306.9	7054.32	8815.79	0	0	1868.61	0	0	2357.72
COTU-CM-0782	0	0	0	0	0	0	0	0	0	0	0	0	0	0	0	0	0	0	0	0	0	0	0	0	0	0	0	0	0	0	0	0	0	4527.88	0	7292.74	0	4930.94	23007.5	0	0	0	0	0	5309.73	0	0	0	11788.6
COTU-CM-0783	0	0	0	0	0	0	0	0	0	0	0	0	0	0	0	0	0	0	0	0	0	0	0	0	0	0	0	0	0	0	0	0	38911.3	40750.9	47282.1	29171	7919.82	7396.42	32867.8	18258.5	6861.38	3527.16	0	0	0	0	0	0	0
COTU-CM-0784	0	0	0	0	0	0	0	0	0	0	0	0	0	0	0	0	0	0	0	0	0	0	0	0	0	0	0	0	0	0	0	0	7782.25	13583.6	12895.1	3646.37	0	2465.47	0	0	6861.38	28217.3	0	0	0	0	0	0	0
COTU-CM-0785	0	0	0	0	0	0	0	0	0	0	0	0	0	0	0	0	0	0	0	0	0	0	0	0	0	0	0	0	0	0	0	0	15564.5	31695.2	30088.6	21878.2	23759.4	12327.4	13147.1	6086.17	6861.38	10581.5	0	0	0	0	0	0	0
COTU-CM-0786	0	0	0	0	0	0	0	0	0	0	0	0	0	0	0	0	0	0	0	0	0	0	0	0	0	0	0	4864.86	0	0	0	0	0	0	0	0	0	0	0	0	0	0	0	0	0	0	0	0	0
COTU-CM-0787	157146	325544	183978	73436.4	371128	171943	169912	198986	272975	42954.2	273574	402057	248275	146426	209392	113976	65463.4	281828	183150	51401.9	309044	56764.9	145772	42100.8	179562	39434.5	176133	11351.4	30872.7	47891	56780.7	41380.7	0	0	0	0	0	0	0	0	0	0	0	0	0	0	0	0	0
COTU-CM-0788	0	0	0	0	0	0	0	0	0	0	0	0	0	0	0	0	0	0	0	0	0	0	0	0	57459.8	0	0	0	0	0	0	0	0	0	0	0	0	0	0	0	0	0	0	0	0	0	0	0	0
COTU-CM-0789	0	0	0	0	0	0	0	0	0	0	0	0	0	0	0	0	0	0	0	0	0	0	0	0	0	0	0	0	0	0	0	0	0	0	0	0	0	0	0	0	0	0	0	0	0	16817.5	29895	0	0
COTU-CM-0790	0	0	0	0	0	0	0	0	0	0	0	0	0	0	0	0	0	0	0	0	0	0	0	0	0	0	0	0	0	0	0	0	0	0	0	0	0	0	0	0	0	0	0	0	0	0	14068.2	0	0
COTU-CM-0791	0	0	0	0	16136	0	0	61226.5	0	0	0	0	0	0	0	0	0	0	0	0	0	0	0	0	0	1272.08	0	0	3430.3	0	0	0	0	0	0	0	0	0	0	0	0	0	0	0	0	0	0	0	0
COTU-CM-0792	0	0	0	0	0	0	0	0	0	0	0	0	0	0	0	0	0	0	0	0	0	0	0	0	0	0	0	0	0	0	0	0	0	9055.76	0	0	0	0	0	0	0	0	0	0	0	0	0	0	0
COTU-CM-0793	0	0	0	0	0	0	0	0	0	0	0	0	0	0	0	0	0	0	0	0	10301.5	0	0	0	0	17809.1	0	0	0	0	0	0	0	0	0	0	0	0	0	0	0	0	0	0	0	0	0	0	0
COTU-CM-0794	0	0	0	0	0	9049.64	0	0	0	0	0	0	42388.4	3957.45	0	0	0	0	0	0	0	0	0	0	0	0	7657.96	0	0	0	0	0	0	0	0	0	0	0	0	0	0	0	0	0	0	0	0	0	0
COTU-CM-0795	0	0	0	0	0	0	0	0	75826.4	0	0	0	0	0	0	0	0	0	0	0	0	0	0	0	0	0	0	0	0	0	0	0	0	36223	30088.6	0	0	0	3286.78	0	6861.38	24690.1	0	0	0	0	0	0	0
COTU-CM-0796	0	0	0	0	0	0	0	0	0	0	0	0	0	0	0	0	0	0	0	0	0	0	0	0	0	0	0	0	0	0	0	0	0	0	0	0	0	0	0	0	0	0	0	0	0	0	0	0	0
COTU-CM-0800	0	0	0	0	0	0	0	0	0	0	6217.58	0	0	0	0	0	0	0	0	934.579	0	0	0	170880	0	0	0	0	0	0	0	0	0	0	0	0	0	0	0	0	0	0	0	0	0	0	0	0	0
COTU-CM-0801	0	0	0	0	0	0	0	0	0	0	0	0	0	0	0	0	0	0	0	0	0	0	0	0	0	0	0	0	0	0	0	0	27237.9	18111.5	38685.3	3646.37	7919.82	7396.42	0	0	0	0	0	0	0	0	0	0	0
COTU-CM-0802	0	0	0	0	0	0	0	0	0	0	0	0	0	0	0	0	0	0	0	0	0	0	0	0	0	0	0	0	0	0	0	0	15564.5	18111.5	4298.37	0	0	2465.47	9860.35	0	96059.3	42325.9	0	0	0	0	0	0	0
COTU-CM-0803	0	0	0	0	0	0	0	0	0	0	0	0	0	0	0	0	0	0	0	0	0	0	0	0	0	0	0	0	0	0	0	0	0	4527.88	12895.1	7292.74	7919.82	4930.94	19720.7	6086.17	13722.8	0	0	0	0	0	0	0	0
COTU-CM-0804	0	0	0	3671.82	0	0	0	0	0	0	0	0	0	0	0	0	0	0	9639.46	1869.16	0	0	0	0	0	0	0	0	0	0	0	0	93387	99613.3	94564.1	69281	23759.4	59171.3	101890	66947.9	96059.3	144614	8815.79	0	15929.2	5605.84	5275.59	0	2357.72
COTU-CM-0805	0	7751.05	5749.3	3671.82	0	0	0	7653.31	0	0	6217.58	4517.5	6055.49	3957.45	0	0	0	0	0	0	0	0	0	0	0	1272.08	0	0	0	0	0	0	38911.3	63390.3	90265.8	58341.9	47518.9	41913	62448.9	115637	164673	109342	0	6000	0	0	0	0	0
COTU-CM-0806	0	0	0	0	0	0	0	0	0	0	0	0	0	0	0	0	0	0	0	0	0	0	38360.9	0	0	0	0	0	0	0	0	0	0	0	0	0	0	0	0	0	0	0	0	0	0	0	0	0	0
COTU-CM-0807	0	0	172479	44061.9	112952	18099.3	10619.5	0	30330.6	3904.92	62175.8	0	24222	19787.3	59826.4	39891.5	0	8540.23	9639.46	5607.48	20602.9	4054.64	0	4953.03	0	0	22973.9	0	0	2817.12	14195.2	5911.53	42802.4	31695.2	47282.1	32817.3	31679.3	9861.89	62448.9	36517	75475.1	38798.8	0	0	0	0	0	0	0
COTU-CM-0808	722871	759603	126485	91795.5	1.09725e+06	289588	1200000	1.68373e+06	326054	164007	1.61657e+06	862842	750881	463022	1.00209e+06	427408	58189.7	478253	57836.8	8411.21	216331	117584	107411	138685	143649	44522.8	405872	16216.2	58315	107050	234221	94584.5	326855	389398	429837	280771	332632	212031	269516	222145	871395	871209	0	12000	37168.1	3737.23	21102.4	11700.5	2357.72
COTU-CM-0809	0	0	0	0	0	0	10619.5	7653.31	0	0	0	0	0	3957.45	0	17096.3	0	0	0	0	0	0	0	0	0	0	0	0	0	0	0	0	54475.8	45278.8	64475.5	21878.2	31679.3	24654.7	16433.9	0	41168.3	52907.4	0	0	0	0	0	0	0
COTU-CM-0810	0	0	0	0	0	0	0	0	0	0	0	0	0	0	0	0	0	0	0	0	0	0	0	0	0	0	0	0	0	0	0	0	0	0	0	0	0	0	0	0	0	0	0	0	0	0	0	0	0
COTU-CM-0811	31429.2	15502.1	0	3671.82	0	0	0	0	60661.2	27334.5	24870.3	18070	0	0	89739.6	11397.6	0	34160.9	0	0	0	4054.64	0	0	7182.47	1272.08	7657.96	0	0	2817.12	0	0	11673.4	13583.6	8596.74	14585.5	0	2465.47	6573.57	3043.09	82336.5	38798.8	0	0	5309.73	0	0	1950.08	0
COTU-CM-0812	0	0	0	0	0	0	0	0	0	0	0	0	0	0	0	0	0	0	0	0	0	0	0	0	0	0	0	0	0	0	0	0	23346.8	22639.4	17193.5	7292.74	0	19723.8	65735.7	48689.4	6861.38	31744.4	0	0	0	0	0	0	0
COTU-CM-0813	83811.2	46506.3	0	14687.3	32272	9049.64	63716.8	38266.5	7582.64	0	62175.8	40657.5	24222	3957.45	44869.8	11397.6	0	17080.5	0	934.579	0	0	3836.09	4953.03	7182.47	1272.08	7657.96	0	6860.59	2817.12	7097.59	3941.02	46693.5	45278.8	30088.6	14585.5	23759.4	17258.3	69022.5	27387.8	96059.3	67016	0	0	0	1868.61	0	0	0
COTU-CM-0814	10476.4	23253.2	0	0	16136	18099.3	0	7653.31	30330.6	23429.5	0	0	0	0	14956.6	5698.78	0	42701.2	0	0	0	0	0	0	0	1272.08	0	0	0	0	0	0	15564.5	49806.7	17193.5	58341.9	15839.6	17258.3	46015	30430.9	27445.5	45853.1	0	0	0	0	0	0	4715.45
COTU-CM-0815	0	0	0	0	0	0	0	0	0	0	0	0	0	0	0	0	0	0	0	0	0	0	0	0	0	0	0	0	0	0	0	0	0	0	0	0	0	0	3286.78	6086.17	34306.9	38798.8	0	0	0	0	0	0	0
COTU-CM-0816	345721	697595	442696	359839	145224	27148.9	339823	642878	7582.64	0	317097	112937	320941	186000	314088	182361	50915.9	230586	96394.6	44859.8	10301.5	16218.5	46033.1	52006.8	0	0	38289.8	1621.62	44593.9	45073.9	21292.8	11823.1	27237.9	36223	47282.1	51049.2	23759.4	24654.7	131471	73034	164673	123451	0	0	0	0	0	0	0
COTU-CM-0817	0	0	0	3671.82	0	0	10619.5	0	15165.3	0	0	0	6055.49	0	0	0	0	0	0	934.579	0	0	0	0	0	0	7657.96	0	0	0	0	0	23346.8	58862.4	77370.7	76573.8	71278.3	29585.7	174200	161284	6861.38	35271.6	0	0	0	0	1758.53	0	7073.17
COTU-CM-0818	0	0	0	0	0	0	0	0	0	0	0	4517.5	0	0	0	0	0	8540.23	0	0	0	0	0	0	0	0	0	0	0	0	0	0	77822.5	49806.7	55878.8	43756.4	15839.6	41913	151192	60861.7	144089	165777	17631.6	66000	15929.2	3737.23	0	3900.16	40081.3
COTU-CM-0819	0	0	0	0	0	0	0	0	0	0	0	0	0	0	0	0	0	0	0	0	0	0	0	0	0	0	0	0	0	0	0	0	97278.2	95085.5	55878.8	76573.8	63358.5	51774.9	128185	149111	137228	190467	8815.79	0	5309.73	5605.84	0	0	9430.89
COTU-CM-0820	0	0	0	0	0	0	0	0	0	0	0	0	0	0	0	0	0	0	0	0	0	0	0	0	0	0	0	0	0	0	0	0	0	0	8596.74	7292.74	0	2465.47	9860.35	9129.26	13722.8	28217.3	0	0	0	0	0	0	0
COTU-CM-0821	0	0	0	0	0	0	0	0	0	0	0	0	0	0	0	0	0	0	0	0	0	0	0	0	0	0	0	0	0	0	0	0	15564.5	18111.5	21491.8	7292.74	15839.6	9861.89	55875.3	54775.5	13722.8	17635.8	0	0	0	0	0	0	4715.45
COTU-CM-0822	62858.4	54257.4	0	0	0	0	0	0	0	0	0	0	0	0	0	0	0	25620.7	0	0	0	0	0	0	0	0	0	0	0	0	0	0	19455.6	36223	21491.8	10939.1	15839.6	14792.8	141332	149111	20584.1	17635.8	0	0	0	3737.23	0	0	0
COTU-CM-0823	701919	821612	764657	337808	1.98473e+06	425333	530973	551038	500455	128862	833156	121972	581327	249319	1.6901e+06	370421	65463.4	298908	385579	98130.8	576883	352753	42197	104014	201109	17809.1	283345	810.811	144072	132405	397465	133995	194556	158476	124653	134916	71278.3	93687.9	223501	155197	109782	144614	17631.6	18000	31858.4	3737.23	3517.06	3900.16	9430.89
COTU-CM-0824	0	116266	0	0	0	0	0	0	0	0	0	0	0	0	0	0	0	0	0	0	0	0	0	0	0	0	0	0	0	0	0	0	0	0	0	0	0	0	0	0	0	0	0	0	0	0	0	0	0
COTU-CM-0825	0	0	0	0	0	0	0	0	0	0	0	0	0	0	0	0	0	0	0	0	0	0	0	0	0	0	0	0	0	0	0	0	35020.1	9055.76	30088.6	47402.8	7919.82	34516.6	29581.1	42603.2	27445.5	84651.8	0	0	0	0	0	0	2357.72
COTU-CM-0826	52382	31004.2	40245.1	11015.5	48408.1	9049.64	21238.9	53573.2	22747.9	0	37305.5	4517.5	24222	19787.3	59826.4	11397.6	7273.71	17080.5	9639.46	2803.74	30904.4	8109.27	3836.09	4953.03	0	1272.08	0	0	10290.9	2817.12	7097.59	0	11673.4	9055.76	17193.5	10939.1	15839.6	9861.89	39441.4	9129.26	27445.5	14108.6	0	6000	0	0	0	0	2357.72
COTU-CM-0827	94287.6	38755.3	34495.8	7343.64	32272	27148.9	10619.5	45919.8	7582.64	3904.92	43523.1	0	0	19787.3	89739.6	11397.6	0	8540.23	9639.46	0	10301.5	4054.64	3836.09	0	0	1272.08	0	0	0	5634.24	14195.2	0	159536	153948	146145	87512.9	126717	64102.3	85456.4	57818.6	144089	141086	8815.79	6000	31858.4	5605.84	0	1950.08	7073.17
COTU-CM-0828	0	0	0	0	0	0	0	0	0	0	0	0	0	0	0	0	0	0	0	0	0	0	0	0	0	0	0	0	0	0	0	0	124516	140364	137548	145855	102958	88757	128185	94335.6	48029.6	56434.6	0	0	0	1868.61	0	1950.08	2357.72
COTU-CM-0829	0	62008.4	0	0	0	0	0	0	0	0	0	0	0	0	0	0	0	0	0	0	0	0	0	0	0	0	0	0	0	0	0	0	0	0	0	0	0	0	0	0	0	0	0	0	0	0	0	0	0
COTU-CM-0830	377150	302291	97738.1	51405.5	0	0	10619.5	7653.31	0	0	31087.9	4517.5	157443	114766	0	0	87284.5	204966	86755.2	11215	0	0	3836.09	0	0	0	15315.9	0	20581.8	42256.8	0	0	0	0	0	0	0	0	0	0	0	0	0	0	0	0	0	0	0
COTU-CM-0831	41905.6	46506.3	17247.9	7343.64	48408.1	0	10619.5	30613.2	7582.64	3904.92	6217.58	0	6055.49	7914.9	74783	5698.78	14547.4	76862.1	19278.9	5607.48	30904.4	129748	7672.19	7429.55	0	0	61263.7	0	10290.9	16902.7	14195.2	13793.6	198447	167532	167636	167733	150477	118343	226788	139982	144089	193994	8815.79	12000	5309.73	3737.23	0	1950.08	21219.5
COTU-CM-0832	0	0	0	0	16136	0	31858.4	137760	0	0	0	0	0	0	0	5698.78	0	0	0	0	0	0	11508.3	7429.55	0	0	0	0	0	0	0	0	15564.5	27167.3	12895.1	14585.5	23759.4	12327.4	128185	45646.3	20584.1	35271.6	0	0	0	0	0	1950.08	2357.72
COTU-CM-0833	0	7751.05	5749.3	0	0	0	10619.5	7653.31	0	0	0	0	0	0	0	0	0	0	0	0	0	0	0	0	0	0	0	0	0	0	0	0	54475.8	22639.4	51580.4	29171	23759.4	27120.2	65735.7	48689.4	130366	158722	0	6000	0	0	0	1950.08	0
COTU-CM-0834	20952.8	38755.3	5749.3	55077.3	16136	0	53097.3	30613.2	0	0	111916	0	30277.5	7914.9	0	5698.78	7273.71	0	0	0	20602.9	0	11508.3	12382.6	0	0	84237.6	0	3430.3	0	0	0	0	0	0	0	0	0	0	0	0	0	0	0	0	0	0	0	0
COTU-CM-0835	0	116266	0	0	0	0	0	0	0	0	0	0	0	0	0	0	0	0	0	934.579	0	0	0	0	0	0	0	0	0	0	0	0	0	0	0	0	0	0	0	0	0	0	0	0	0	0	0	0	0
COTU-CM-0836	345721	348797	137983	84451.9	32272	0	31858.4	38266.5	0	7809.85	37305.5	4517.5	102943	51446.9	0	0	80010.8	298908	28918.4	10280.4	0	4054.64	0	2476.52	0	0	15315.9	0	10290.9	28171.2	0	1970.51	190665	230922	189128	72927.4	71278.3	61636.8	154479	85206.4	459712	426786	35263.2	24000	21238.9	5605.84	15826.8	3900.16	7073.17
COTU-CM-0837	534296	565827	0	0	0	0	0	0	0	0	0	0	0	0	0	0	109106	657598	0	0	0	0	0	0	0	0	0	0	0	0	0	0	54475.8	36223	47282.1	51049.2	47518.9	39447.6	39441.4	30430.9	13722.8	28217.3	0	0	5309.73	0	1758.53	3900.16	4715.45
COTU-CM-0838	0	46506.3	0	0	0	0	0	0	0	0	0	0	0	0	0	0	0	0	0	0	0	0	0	0	0	0	0	0	0	0	0	0	0	0	0	0	0	0	0	0	0	0	0	0	0	0	0	0	0
COTU-CM-0839	0	38755.3	28746.5	22030.9	0	0	0	45919.8	37913.2	27334.5	0	0	0	0	74783	34192.7	0	17080.5	0	934.579	0	8109.27	0	2476.52	7182.47	5088.32	0	0	0	0	42585.6	1970.51	11673.4	49806.7	8596.74	36463.7	23759.4	24654.7	32867.8	18258.5	13722.8	42325.9	0	0	0	1868.61	1758.53	0	0
COTU-CM-0840	0	0	0	0	0	0	0	0	0	0	0	0	0	0	0	0	0	0	0	0	0	0	0	0	0	0	0	0	0	0	0	0	35020.1	13583.6	17193.5	25524.6	15839.6	14792.8	6573.57	0	68613.8	31744.4	0	0	0	0	0	0	0
COTU-CM-0841	0	0	0	0	0	0	42477.9	30613.2	0	0	0	0	0	0	0	0	0	0	0	0	0	0	3836.09	2476.52	0	0	0	0	0	0	0	0	11673.4	13583.6	21491.8	21878.2	15839.6	19723.8	3286.78	18258.5	27445.5	21163	0	0	0	0	0	0	0
COTU-CM-0842	0	0	0	0	0	0	0	0	0	0	0	0	0	0	0	0	0	0	0	0	0	0	0	0	0	0	0	0	0	0	0	0	42802.4	45278.8	42983.7	32817.3	15839.6	12327.4	6573.57	24344.7	48029.6	105815	0	0	0	0	0	1950.08	2357.72
COTU-CM-0843	0	0	0	0	0	0	0	0	0	0	0	0	0	0	0	0	0	0	0	0	0	0	0	0	0	0	0	0	0	0	0	0	85604.8	140364	111758	80220.2	126717	51774.9	341825	276921	54891	42325.9	17631.6	0	0	0	1758.53	0	0
COTU-CM-0844	0	0	0	0	0	0	0	0	0	0	0	0	0	0	0	0	0	0	0	0	0	0	0	0	0	0	0	0	0	0	0	0	3891.13	4527.88	17193.5	7292.74	7919.82	7396.42	52588.5	36517	75475.1	63488.9	8815.79	0	0	0	0	0	0
COTU-CM-0845	73334.8	38755.3	28746.5	18359.1	145224	18099.3	10619.5	7653.31	0	0	93263.7	0	12111	11872.4	0	11397.6	7273.71	8540.23	9639.46	2803.74	10301.5	4054.64	0	0	7182.47	0	7657.96	0	3430.3	2817.12	0	3941.02	0	9055.76	17193.5	0	7919.82	0	32867.8	6086.17	20584.1	14108.6	0	0	0	0	0	0	0
COTU-CM-0846	0	0	0	0	0	0	0	0	0	0	0	0	0	0	0	0	0	0	0	0	0	0	0	0	0	0	0	0	0	0	0	0	124516	90557.6	137548	61988.3	87118	41913	230075	115637	109782	63488.9	0	12000	15929.2	3737.23	0	0	4715.45
COTU-CM-0847	0	0	0	0	0	0	0	0	0	0	0	0	0	0	0	0	0	0	0	0	0	0	0	0	0	0	0	0	0	0	0	0	19455.6	31695.2	25790.2	25524.6	15839.6	14792.8	36154.6	15215.4	61752.4	141086	0	0	0	0	0	0	0
COTU-CM-0848	0	7751.05	5749.3	0	0	0	0	0	0	0	0	4517.5	0	3957.45	0	0	0	0	0	0	0	4054.64	0	0	0	1272.08	0	0	0	5634.24	0	0	194556	203755	98862.5	156794	71278.3	165187	269516	167370	295039	148141	0	0	0	0	0	0	0
COTU-CM-0849	0	0	0	0	0	0	0	0	0	0	0	0	0	0	0	0	0	0	0	0	0	0	0	0	0	0	0	0	0	0	0	0	3891.13	0	4298.37	25524.6	15839.6	17258.3	6573.57	15215.4	13722.8	0	0	0	0	0	0	0	4715.45
COTU-CM-0850	104764	31004.2	17247.9	3671.82	16136	18099.3	10619.5	38266.5	7582.64	0	12435.2	0	0	0	29913.2	11397.6	0	0	0	3738.32	82411.8	0	3836.09	9906.06	7182.47	0	0	0	6860.59	0	7097.59	0	3891.13	4527.88	0	3646.37	7919.82	2465.47	6573.57	3043.09	6861.38	10581.5	0	0	0	0	0	0	0
COTU-CM-0851	0	0	0	0	0	0	0	0	0	0	0	0	0	0	0	0	0	0	0	0	0	0	0	0	0	0	0	0	0	0	0	0	23346.8	18111.5	25790.2	3646.37	7919.82	0	39441.4	18258.5	13722.8	7054.32	0	0	0	0	0	0	0
COTU-CM-0852	0	0	0	0	0	0	0	0	0	0	0	0	0	0	0	0	0	0	0	0	0	0	0	0	0	0	0	0	0	0	0	0	15564.5	9055.76	8596.74	0	0	17258.3	13147.1	3043.09	6861.38	10581.5	17631.6	6000	5309.73	1868.61	0	1950.08	4715.45
COTU-CM-0853	0	0	0	0	0	0	0	0	0	0	0	0	0	0	0	0	0	0	0	0	0	0	0	0	0	0	0	0	0	0	0	0	58366.9	27167.3	42983.7	36463.7	15839.6	17258.3	6573.57	30430.9	20584.1	35271.6	26447.4	18000	31858.4	0	3517.06	5850.23	14146.3
COTU-CM-0857	0	0	0	0	0	0	0	0	0	0	0	0	0	0	0	0	0	0	0	0	0	0	0	0	0	0	0	0	0	0	0	0	19455.6	9055.76	8596.74	14585.5	15839.6	19723.8	0	0	6861.38	3527.16	0	0	0	0	0	0	0
COTU-CM-0860	0	0	0	0	0	0	0	0	0	0	0	0	0	0	0	0	0	0	0	0	0	0	0	0	0	0	0	0	0	0	0	0	11673.4	9055.76	21491.8	14585.5	0	9861.89	19720.7	0	13722.8	14108.6	8815.79	24000	10619.5	1868.61	1758.53	1950.08	4715.45
COTU-CM-0861	0	62008.4	0	0	0	0	0	38266.5	0	0	0	0	0	0	0	0	7273.71	25620.7	0	5607.48	10301.5	16218.5	11508.3	4953.03	0	1272.08	38289.8	810.811	3430.3	8451.35	21292.8	9852.56	311290	398453	300886	368283	205915	231754	759247	346912	514603	634889	8815.79	6000	5309.73	5605.84	7034.12	3900.16	2357.72
COTU-CM-0862	20952.8	7751.05	17247.9	7343.64	0	0	21238.9	22959.9	0	0	0	0	0	0	0	0	14547.4	17080.5	0	6542.06	10301.5	0	11508.3	4953.03	0	0	0	0	0	0	0	0	81713.6	90557.6	94564.1	94805.6	95037.8	64102.3	16433.9	60861.7	54891	193994	8815.79	6000	0	1868.61	5275.59	5850.23	0
COTU-CM-0863	52382	69759.5	137983	18359.1	48408.1	9049.64	21238.9	30613.2	0	0	0	4517.5	6055.49	15829.8	0	0	21821.1	34160.9	19278.9	5607.48	10301.5	12163.9	7672.19	9906.06	0	0	7657.96	810.811	0	0	0	0	0	0	0	7292.74	0	0	3286.78	0	6861.38	10581.5	0	0	0	0	0	0	2357.72
COTU-CM-0864	31429.2	15502.1	28746.5	3671.82	0	9049.64	31858.4	0	0	0	0	0	0	0	0	0	14547.4	17080.5	0	4672.9	0	0	3836.09	14859.1	0	0	0	0	0	0	0	0	0	0	0	0	0	0	0	0	0	0	0	0	0	0	0	0	0
COTU-CM-0865	0	0	5749.3	7343.64	64544.1	0	10619.5	0	30330.6	19524.6	12435.2	9035	24222	7914.9	0	34192.7	0	8540.23	0	934.579	10301.5	0	3836.09	0	35912.4	3816.24	15315.9	810.811	0	2817.12	0	7882.04	11673.4	22639.4	12895.1	36463.7	7919.82	14792.8	0	15215.4	0	14108.6	0	6000	0	1868.61	0	1950.08	0
COTU-CM-0866	0	7751.05	11498.6	0	64544.1	36198.5	21238.9	22959.9	22747.9	15619.7	43523.1	4517.5	18166.5	3957.45	74783	11397.6	0	0	0	1869.16	30904.4	0	3836.09	0	21547.4	2544.16	0	810.811	0	2817.12	14195.2	0	50584.6	36223	47282.1	43756.4	87118	66567.7	13147.1	30430.9	0	35271.6	0	6000	0	7474.45	3517.06	3900.16	0
COTU-CM-0867	31429.2	23253.2	28746.5	11015.5	209768	27148.9	10619.5	15306.6	151653	42954.2	31087.9	27105	12111	27702.2	269219	28493.9	7273.71	17080.5	0	4672.9	72110.3	8109.27	0	12382.6	7182.47	7632.48	15315.9	1621.62	10290.9	8451.35	0	5911.53	15564.5	22639.4	25790.2	10939.1	0	9861.89	13147.1	18258.5	6861.38	17635.8	8815.79	0	0	1868.61	10551.2	3900.16	2357.72
COTU-CM-0868	0	0	0	0	0	0	0	0	0	0	0	0	0	0	0	0	0	0	0	0	0	0	0	0	0	0	0	0	0	0	0	0	0	4527.88	0	0	0	0	19720.7	0	13722.8	0	0	0	0	0	0	0	0
COTU-CM-0869	10476.4	0	0	0	0	0	31858.4	0	0	0	0	0	0	0	0	0	0	0	0	0	0	0	0	0	0	0	0	0	0	0	0	1970.51	19455.6	22639.4	38685.3	18231.9	15839.6	7396.42	52588.5	18258.5	13722.8	7054.32	8815.79	0	0	1868.61	0	1950.08	0
COTU-CM-0870	0	0	0	0	0	0	0	0	0	0	0	0	0	0	0	0	0	0	0	0	0	0	0	0	0	0	0	0	0	0	0	0	7782.25	9055.76	12895.1	7292.74	0	7396.42	39441.4	12172.3	34306.9	3527.16	0	0	0	0	0	1950.08	0
COTU-CM-0871	0	0	0	0	0	0	0	0	0	0	0	0	0	0	0	0	0	0	0	0	0	0	0	0	0	0	0	0	0	0	0	0	11673.4	0	4298.37	3646.37	7919.82	0	26294.3	12172.3	13722.8	10581.5	0	0	0	0	0	0	0
COTU-CM-0872	0	7751.05	5749.3	0	0	0	10619.5	15306.6	0	0	55958.2	9035	6055.49	0	44869.8	5698.78	0	8540.23	0	0	0	0	3836.09	0	0	0	0	810.811	0	0	0	0	0	0	0	0	0	0	0	0	0	0	0	0	0	0	0	0	0
COTU-CM-0873	0	0	0	0	0	0	0	0	0	0	0	0	0	0	0	0	0	0	0	0	0	0	0	0	0	0	0	810.811	0	0	0	0	3891.13	13583.6	12895.1	18231.9	0	2465.47	26294.3	0	13722.8	7054.32	0	0	0	0	0	0	0
COTU-CM-0874	0	0	5749.3	0	0	0	0	0	7582.64	0	18652.7	22587.5	0	0	44869.8	22795.1	0	0	9639.46	934.579	0	0	0	0	0	0	22973.9	2432.43	0	5634.24	14195.2	5911.53	35020.1	36223	38685.3	29171	7919.82	9861.89	138045	9129.26	48029.6	10581.5	0	0	0	0	0	0	0
COTU-CM-0875	0	0	0	0	0	0	0	0	0	0	0	0	0	0	0	0	0	0	0	0	0	0	0	0	0	0	0	0	0	0	0	0	3891.13	0	8596.74	0	0	4930.94	36154.6	18258.5	0	3527.16	0	0	0	0	0	0	0
COTU-CM-0876	0	0	0	0	0	0	0	0	0	0	0	0	0	0	0	0	0	0	0	0	0	0	0	0	0	0	0	0	0	0	0	0	35020.1	22639.4	47282.1	10939.1	15839.6	19723.8	19720.7	0	34306.9	35271.6	0	0	0	0	0	1950.08	2357.72
COTU-CM-0877	0	0	0	0	0	0	0	0	0	0	0	0	0	0	0	0	0	0	0	0	0	0	0	0	0	0	0	0	0	0	0	0	0	0	0	0	0	0	0	0	0	0	0	0	0	0	0	0	0
COTU-CM-0878	0	0	0	0	0	9049.64	0	0	0	0	0	0	0	0	0	0	0	0	0	4672.9	0	0	0	59436.4	0	0	0	0	0	0	0	0	0	0	0	0	0	0	0	0	0	0	0	0	0	0	0	0	0
COTU-CM-0879	0	0	0	0	0	0	0	0	0	0	0	4517.5	0	0	0	0	0	0	0	0	0	0	0	0	0	0	0	0	0	0	0	0	23346.8	31695.2	25790.2	3646.37	7919.82	14792.8	16433.9	0	54891	63488.9	0	0	0	1868.61	0	0	0
COTU-CM-0880	0	46506.3	0	0	0	0	0	0	0	0	18652.7	0	30277.5	0	0	0	0	0	0	0	0	0	0	0	0	0	15315.9	0	0	0	0	0	7782.25	49806.7	47282.1	10939.1	0	4930.94	36154.6	9129.26	13722.8	24690.1	26447.4	0	10619.5	3737.23	0	1950.08	7073.17
COTU-CM-0881	0	0	0	0	0	0	0	0	0	0	0	0	0	0	0	0	0	0	0	0	0	0	0	0	0	0	0	0	0	0	0	0	85604.8	104141	55878.8	58341.9	63358.5	24654.7	29581.1	39560.1	20584.1	59961.7	0	0	0	0	0	1950.08	0
COTU-CM-0883	0	0	0	0	0	0	0	0	0	0	62175.8	4517.5	0	7914.9	14956.6	0	0	0	0	0	0	0	0	0	0	0	22973.9	0	0	0	7097.59	0	23346.8	36223	17193.5	21878.2	7919.82	14792.8	42728.2	42603.2	13722.8	28217.3	8815.79	6000	0	0	0	0	2357.72
COTU-CM-0884	0	0	0	0	0	0	0	0	0	0	0	0	0	0	0	0	0	0	0	0	0	0	0	0	0	0	0	0	0	0	0	0	3891.13	0	4298.37	0	0	0	0	3043.09	89197.9	45853.1	0	0	0	0	0	0	0
COTU-CM-0885	1.05812e+06	852616	0	0	774529	389134	31858.4	99493	0	3904.92	0	0	24222	23744.7	0	0	50915.9	239126	0	0	103015	20273.2	0	0	0	0	0	0	3430.3	8451.35	0	0	0	0	0	0	0	0	0	0	0	0	0	0	0	0	0	0	0
COTU-CM-0886	0	0	17247.9	22030.9	0	0	31858.4	30613.2	22747.9	23429.5	0	0	18166.5	0	179479	96879.2	0	0	0	0	0	0	0	4953.03	7182.47	2544.16	0	0	0	0	7097.59	1970.51	7782.25	13583.6	4298.37	10939.1	23759.4	14792.8	52588.5	85206.4	34306.9	24690.1	0	0	0	0	0	0	0
COTU-CM-0887	0	0	0	0	0	0	0	0	0	0	0	0	0	0	0	0	0	0	0	0	0	0	0	0	0	0	0	0	0	0	0	0	54475.8	22639.4	38685.3	32817.3	31679.3	36982.1	55875.3	51732.4	34306.9	31744.4	0	0	0	0	0	0	0
COTU-CM-0888	0	0	0	0	0	0	0	0	0	0	0	0	84776.9	0	0	0	0	0	0	0	0	0	0	0	0	0	0	0	0	0	0	0	0	0	0	0	0	0	0	0	0	0	0	0	0	0	0	0	0
COTU-CM-0890	0	0	0	0	0	0	0	0	0	0	0	0	0	0	0	0	0	0	9639.46	0	0	0	0	0	0	0	0	0	0	0	0	0	0	0	4298.37	0	0	0	0	0	0	0	0	0	0	0	0	0	14146.3
COTU-CM-0893	0	7751.05	0	0	0	0	0	0	0	0	0	0	90832.4	0	0	0	0	0	0	0	0	0	0	0	0	0	0	0	0	0	0	0	0	0	0	0	0	0	0	0	0	0	0	0	0	0	0	0	0
COTU-CM-0895	785730	906873	0	0	1.58133e+06	796368	0	7653.31	0	0	43523.1	4517.5	484439	474894	14956.6	0	101832	631977	0	0	597485	186513	0	0	0	0	7657.96	0	113200	87330.7	0	0	7782.25	4527.88	12895.1	14585.5	0	2465.47	0	3043.09	27445.5	7054.32	0	0	0	0	0	0	0
COTU-CM-0897	0	0	0	0	0	0	0	0	0	0	0	0	0	0	0	0	0	0	0	0	0	0	0	0	0	0	0	0	0	0	0	0	291834	208282	206322	240660	190076	165187	55875.3	51732.4	686138	638416	8815.79	6000	10619.5	0	3517.06	0	0
COTU-CM-0898	0	0	0	0	0	0	0	0	0	0	0	0	0	0	0	0	0	0	0	934.579	0	0	0	0	0	0	0	0	0	0	0	0	15564.5	45278.8	30088.6	10939.1	31679.3	24654.7	32867.8	30430.9	54891	52907.4	0	0	0	0	0	0	0
COTU-CM-0899	0	0	0	0	16136	0	10619.5	0	0	0	0	0	0	3957.45	14956.6	0	0	0	0	0	0	0	0	0	0	0	0	0	0	0	0	0	31129	36223	34387	18231.9	7919.82	27120.2	16433.9	6086.17	13722.8	35271.6	8815.79	6000	0	1868.61	0	0	0
COTU-CM-0900	0	0	0	0	0	0	0	0	0	0	0	0	0	0	0	0	0	0	0	0	0	0	0	0	0	0	0	0	0	0	0	0	3891.13	0	4298.37	14585.5	0	0	16433.9	9129.26	20584.1	21163	0	0	0	0	0	0	0
COTU-CM-0901	0	0	0	0	0	0	0	0	0	0	0	0	0	0	0	0	0	0	0	0	0	0	0	0	0	0	0	0	0	0	0	0	31129	0	8596.74	36463.7	7919.82	9861.89	19720.7	18258.5	34306.9	59961.7	0	0	0	0	3517.06	0	2357.72
COTU-CM-0902	178099	131768	120735	69764.6	258176	90496.4	201770	221946	151653	58573.9	192745	72280	375440	83106.5	179479	131072	21821.1	145184	0	25233.6	30904.4	16218.5	30688.8	76772	50277.3	15265	38289.8	0	157794	50708.1	120659	25616.6	70040.3	67918.2	42983.7	25524.6	23759.4	19723.8	49301.8	39560.1	96059.3	56434.6	0	6000	5309.73	0	1758.53	0	2357.72
COTU-CM-0903	0	0	0	0	0	0	0	0	0	0	0	0	0	0	0	0	0	0	0	0	0	0	0	0	0	0	0	0	0	0	0	0	19455.6	13583.6	25790.2	18231.9	15839.6	12327.4	16433.9	15215.4	48029.6	28217.3	0	0	0	0	0	0	0
COTU-CM-0904	10476.4	0	40245.1	33046.4	129088	54297.8	53097.3	53573.2	7582.64	0	130569	90350	6055.49	3957.45	0	11397.6	0	8540.23	9639.46	7476.64	10301.5	12163.9	7672.19	4953.03	0	0	84237.6	2432.43	0	2817.12	0	1970.51	15564.5	13583.6	30088.6	7292.74	23759.4	9861.89	0	12172.3	48029.6	14108.6	0	0	0	0	0	0	0
COTU-CM-0905	0	0	0	0	0	0	0	0	0	0	0	0	0	0	0	0	0	0	0	0	0	0	0	0	0	0	0	0	0	0	0	0	11673.4	18111.5	4298.37	21878.2	15839.6	14792.8	98603.5	30430.9	48029.6	17635.8	0	0	0	0	0	0	0
COTU-CM-0906	10476.4	62008.4	28746.5	22030.9	96816.1	18099.3	84955.8	61226.5	0	0	31087.9	9035	12111	11872.4	29913.2	22795.1	21821.1	34160.9	9639.46	2803.74	30904.4	0	3836.09	4953.03	0	0	7657.96	4864.86	6860.59	0	21292.8	13793.6	11673.4	13583.6	8596.74	10939.1	0	2465.47	13147.1	0	27445.5	3527.16	0	0	0	0	0	0	0
COTU-CM-0907	0	0	0	0	0	0	0	0	0	3904.92	0	0	18166.5	0	0	5698.78	0	0	0	0	0	0	0	0	0	0	0	0	0	2817.12	0	0	105060	104141	94564.1	40110.1	71278.3	54240.4	65735.7	24344.7	185257	95233.3	17631.6	0	5309.73	0	1758.53	1950.08	0
COTU-CM-0908	1.16288e+06	798358	523186	345151	1.46838e+06	579177	1.55044e+06	2.01282e+06	212314	164007	882896	411092	429940	189958	2.3781e+06	718046	210938	862563	202429	93457.9	360552	125694	145772	212980	323211	48339	551373	5675.68	150933	95782	340684	145818	120625	81501.8	120354	40110.1	63358.5	59171.3	98603.5	57818.6	116643	81124.7	8815.79	0	0	0	1758.53	1950.08	0
COTU-CM-0909	0	0	5749.3	0	0	0	0	0	0	0	0	0	0	0	0	0	0	0	0	0	0	0	0	0	0	0	0	0	0	0	0	0	23346.8	9055.76	8596.74	7292.74	7919.82	7396.42	29581.1	9129.26	68613.8	21163	0	0	0	0	0	0	0
COTU-CM-0910	0	0	0	0	0	0	0	0	0	0	0	0	0	0	14956.6	5698.78	0	0	0	0	0	0	0	0	0	0	7657.96	0	0	0	7097.59	0	35020.1	27167.3	47282.1	32817.3	7919.82	14792.8	32867.8	3043.09	27445.5	35271.6	0	0	0	0	1758.53	0	0
COTU-CM-0911	10476.4	0	0	0	0	9049.64	21238.9	99493	0	0	43523.1	18070	0	0	0	0	0	8540.23	0	0	0	0	23016.6	19812.1	0	0	7657.96	810.811	0	0	0	0	0	0	0	0	0	0	0	0	0	0	0	0	0	0	0	0	0
COTU-CM-0912	20952.8	0	22997.2	0	0	0	21238.9	7653.31	7582.64	3904.92	0	0	6055.49	0	0	0	0	0	0	934.579	0	0	3836.09	0	0	0	0	2432.43	0	0	0	0	15564.5	18111.5	8596.74	7292.74	7919.82	7396.42	29581.1	18258.5	34306.9	38798.8	0	0	0	0	0	0	0
COTU-CM-0913	0	0	0	0	0	0	0	0	0	0	0	0	0	0	0	0	0	0	0	0	0	0	0	0	0	0	0	0	0	0	0	0	19455.6	31695.2	8596.74	29171	0	12327.4	26294.3	42603.2	13722.8	28217.3	0	0	0	0	0	3900.16	2357.72
COTU-CM-0914	240957	108515	28746.5	0	32272	0	31858.4	7653.31	0	0	0	13552.5	248275	154341	0	0	0	42701.2	0	0	195728	0	3836.09	0	7182.47	0	0	0	44593.9	11268.5	0	0	50584.6	45278.8	51580.4	76573.8	23759.4	32051.1	49301.8	39560.1	68613.8	49380.2	0	0	0	0	0	0	0
COTU-CM-0915	0	0	0	0	0	0	0	0	0	0	0	0	0	0	0	0	0	0	0	0	0	0	0	0	0	0	0	0	0	0	0	0	35020.1	36223	34387	10939.1	39599.1	9861.89	39441.4	33473.9	20584.1	35271.6	0	0	0	0	1758.53	0	0
COTU-CM-0916	272386	248034	57493	55077.3	64544.1	36198.5	138053	176026	22747.9	11714.8	43523.1	18070	248275	79149	179479	91180.5	0	76862.1	0	4672.9	61808.8	24327.8	26852.7	7429.55	7182.47	0	15315.9	810.811	6860.59	16902.7	56780.7	15764.1	38911.3	31695.2	34387	21878.2	31679.3	17258.3	115037	60861.7	48029.6	31744.4	0	0	0	0	0	0	2357.72
COTU-CM-0917	0	0	0	0	0	0	0	0	0	0	0	0	0	0	0	0	0	0	0	0	0	0	0	0	0	0	0	0	0	0	0	0	54475.8	54334.5	68773.9	72927.4	79198.2	64102.3	78882.8	57818.6	6861.38	7054.32	0	0	0	0	0	0	0
COTU-CM-0918	0	0	0	0	0	0	0	0	0	0	0	0	0	0	0	0	0	0	0	0	0	0	0	0	0	0	0	0	0	0	0	0	11673.4	22639.4	17193.5	25524.6	7919.82	9861.89	26294.3	12172.3	0	28217.3	0	0	0	0	0	0	0
COTU-CM-0919	41905.6	0	0	0	32272	9049.64	0	15306.6	0	0	0	0	0	0	0	0	0	0	0	0	10301.5	0	0	0	0	0	0	810.811	0	0	0	0	42802.4	27167.3	60177.2	40110.1	7919.82	9861.89	13147.1	9129.26	89197.9	52907.4	0	6000	0	0	0	0	0
COTU-CM-0920	0	38755.3	0	0	0	0	0	0	0	0	0	0	0	0	0	0	0	0	0	0	0	0	0	0	0	0	0	0	0	0	0	0	23346.8	22639.4	30088.6	18231.9	15839.6	2465.47	13147.1	6086.17	13722.8	7054.32	0	0	0	0	0	0	0
COTU-CM-0921	0	0	0	0	0	0	0	0	0	0	0	0	0	0	0	0	0	0	0	0	0	0	0	0	0	0	0	0	0	0	0	0	3891.13	4527.88	8596.74	3646.37	0	0	29581.1	6086.17	6861.38	3527.16	0	0	0	0	0	0	0
COTU-CM-0922	31429.2	139519	160980	102811	661577	334837	31858.4	76533.1	37913.2	19524.6	143004	49692.5	12111	23744.7	89739.6	96879.2	14547.4	8540.23	57836.8	5607.48	82411.8	28382.5	11508.3	12382.6	0	0	0	1621.62	3430.3	5634.24	28390.4	7882.04	124516	90557.6	111758	102098	47518.9	66567.7	144618	133896	164673	176358	8815.79	6000	5309.73	1868.61	3517.06	1950.08	2357.72
COTU-CM-0923	314292	294540	471443	440619	0	0	307965	260212	0	0	286009	67762.5	6055.49	0	0	0	72737.1	290368	134953	69158.9	0	0	53705.3	24765.2	0	0	61263.7	1621.62	0	0	0	0	46693.5	63390.3	55878.8	25524.6	15839.6	22189.2	59162.1	27387.8	89197.9	52907.4	17631.6	6000	0	0	0	0	0
COTU-CM-0924	0	7751.05	0	7343.64	0	9049.64	42477.9	15306.6	0	3904.92	0	9035	0	3957.45	14956.6	17096.3	0	0	0	0	10301.5	0	3836.09	4953.03	0	1272.08	0	0	0	2817.12	7097.59	0	140081	217338	163338	94805.6	71278.3	123274	269516	158240	130366	271591	0	0	0	0	1758.53	0	0
COTU-CM-0925	0	0	0	3671.82	16136	18099.3	0	0	0	0	0	0	0	0	0	0	0	25620.7	0	0	10301.5	4054.64	3836.09	2476.52	0	0	0	0	0	0	0	0	42802.4	36223	64475.5	29171	15839.6	24654.7	19720.7	12172.3	89197.9	84651.8	8815.79	0	10619.5	1868.61	0	0	0
COTU-CM-0926	0	0	0	0	0	0	0	0	0	0	0	0	0	0	0	0	0	0	0	0	0	0	0	0	0	0	0	0	0	0	0	0	15564.5	22639.4	25790.2	18231.9	31679.3	19723.8	23007.5	21301.6	27445.5	45853.1	0	0	0	0	0	0	2357.72
COTU-CM-0927	0	0	0	0	0	0	0	7653.31	7582.64	0	12435.2	0	0	3957.45	0	0	0	0	0	0	0	0	0	0	0	0	0	0	0	0	0	0	89495.9	63390.3	94564.1	54695.6	15839.6	39447.6	75596	9129.26	171534	151668	0	0	0	0	0	0	0
COTU-CM-0928	0	0	0	0	0	0	0	0	0	0	0	0	0	0	0	0	0	0	0	0	0	0	0	0	0	0	0	0	0	0	0	0	7782.25	4527.88	12895.1	0	0	0	203781	203887	54891	52907.4	0	0	0	0	0	0	0
COTU-CM-0929	0	7751.05	34495.8	14687.3	0	0	0	0	0	0	24870.3	49692.5	0	3957.45	29913.2	0	0	0	9639.46	934.579	0	0	0	0	0	0	7657.96	4054.05	0	0	0	1970.51	19455.6	18111.5	30088.6	10939.1	31679.3	22189.2	26294.3	9129.26	27445.5	24690.1	0	0	0	0	0	0	0
COTU-CM-0930	0	0	0	0	0	0	0	0	0	0	0	0	0	0	0	0	0	0	0	0	0	0	0	0	0	0	0	0	0	0	0	0	27237.9	13583.6	12895.1	14585.5	7919.82	22189.2	36154.6	51732.4	198980	95233.3	0	0	0	0	0	1950.08	0
COTU-CM-0931	0	0	0	0	0	0	0	0	0	0	0	0	0	0	0	0	0	0	0	0	0	0	0	0	0	0	0	0	0	0	0	0	11673.4	22639.4	17193.5	7292.74	0	7396.42	16433.9	9129.26	27445.5	10581.5	0	0	0	0	0	0	2357.72
COTU-CM-0932	0	0	0	0	0	0	0	0	0	0	0	0	0	0	0	0	0	0	0	0	0	0	0	0	0	0	0	0	0	0	0	0	31129	45278.8	51580.4	32817.3	15839.6	29585.7	36154.6	33473.9	61752.4	67016	0	0	0	3737.23	0	0	0
COTU-CM-0933	0	0	0	3671.82	0	0	0	0	0	0	18652.7	40657.5	12111	15829.8	0	0	0	0	0	0	0	0	0	2476.52	0	0	22973.9	810.811	0	5634.24	0	0	0	0	0	0	0	0	0	0	0	0	0	0	0	0	0	0	0
COTU-CM-0935	10476.4	7751.05	11498.6	40390	16136	36198.5	31858.4	30613.2	7582.64	3904.92	111916	108420	115054	130596	89739.6	79782.9	7273.71	8540.23	9639.46	24299.1	30904.4	12163.9	7672.19	24765.2	7182.47	1272.08	114869	1621.62	48024.1	47891	7097.59	17734.6	0	0	0	0	0	0	0	3043.09	0	0	0	0	0	0	0	0	0
COTU-CM-0936	0	0	0	0	0	0	0	0	0	0	0	0	0	0	0	0	0	0	0	0	0	0	0	0	0	0	0	0	0	0	0	0	3891.13	9055.76	30088.6	54695.6	55438.7	49309.4	6573.57	12172.3	20584.1	81124.7	0	0	0	1868.61	7034.12	1950.08	2357.72
COTU-CM-0937	0	0	0	0	2.45267e+06	1.24885e+06	923894	581651	0	0	0	0	0	0	0	0	0	0	0	0	690199	324371	118919	81725	0	0	0	0	0	0	0	0	0	0	0	0	0	0	0	0	0	0	0	0	0	0	0	0	0
COTU-CM-0938	0	0	0	0	0	0	0	0	0	0	0	0	0	0	0	0	0	0	0	0	0	0	0	0	0	0	0	0	0	0	0	0	31129	63390.3	51580.4	18231.9	7919.82	9861.89	115037	69991	27445.5	42325.9	0	0	0	0	0	0	0
COTU-CM-0939	0	0	0	0	0	0	0	0	0	0	0	0	0	0	0	0	0	0	0	0	0	0	0	0	0	0	0	0	0	0	0	0	7782.25	9055.76	0	7292.74	7919.82	0	59162.1	103465	27445.5	7054.32	0	0	0	0	0	0	0
COTU-CM-0940	2.07433e+06	968882	546184	279058	290448	117645	42477.9	68879.8	0	3904.92	509842	158112	199831	59361.8	14956.6	0	152748	708839	125313	29906.5	92713.3	60819.6	15344.4	0	0	0	145501	810.811	24012.1	30988.3	0	0	15564.5	9055.76	21491.8	0	7919.82	2465.47	0	3043.09	54891	35271.6	0	0	0	0	0	0	0
COTU-CM-0941	963829	364300	201226	66092.8	80680.1	90496.4	53097.3	22959.9	0	0	124352	49692.5	102943	27702.2	0	0	29094.8	264747	9639.46	8411.21	30904.4	16218.5	3836.09	0	0	0	30631.8	810.811	20581.8	11268.5	0	0	0	0	12895.1	7292.74	0	2465.47	0	0	20584.1	14108.6	0	0	0	0	0	0	0
COTU-CM-0942	0	0	40245.1	0	0	0	0	0	0	0	0	0	0	0	0	0	0	0	0	0	0	0	0	0	0	0	0	0	0	0	0	0	0	0	0	0	0	0	0	0	0	0	0	0	0	0	0	0	0
COTU-CM-0943	10476.4	0	0	0	0	0	10619.5	7653.31	0	0	0	4517.5	6055.49	3957.45	0	11397.6	0	0	0	0	10301.5	4054.64	0	0	0	0	0	0	0	0	0	0	19455.6	13583.6	4298.37	21878.2	23759.4	39447.6	26294.3	9129.26	13722.8	42325.9	0	0	0	0	0	0	0
COTU-CM-0944	62858.4	31004.2	22997.2	14687.3	48408.1	9049.64	53097.3	53573.2	37913.2	0	68393.4	22587.5	18166.5	0	44869.8	11397.6	7273.71	42701.2	0	1869.16	0	0	3836.09	2476.52	0	0	38289.8	810.811	3430.3	8451.35	0	3941.02	15564.5	13583.6	17193.5	0	7919.82	4930.94	6573.57	6086.17	48029.6	21163	0	0	0	0	0	1950.08	0
COTU-CM-0945	0	0	0	0	0	0	10619.5	0	0	0	0	9035	6055.49	0	0	0	0	8540.23	0	0	0	0	0	0	0	0	0	0	0	0	0	0	50584.6	40750.9	38685.3	21878.2	55438.7	34516.6	95316.7	33473.9	13722.8	14108.6	0	0	0	0	1758.53	3900.16	0
COTU-CM-0946	0	0	0	0	0	0	0	0	0	0	0	0	0	0	0	0	0	0	0	0	0	0	0	0	0	0	0	0	0	0	0	0	0	13583.6	4298.37	3646.37	7919.82	0	0	0	13722.8	7054.32	0	6000	37168.1	7474.45	0	0	0
COTU-CM-0948	0	0	0	0	0	0	0	0	0	0	0	0	0	0	0	0	0	34160.9	28918.4	0	0	20273.2	7672.19	0	43094.8	0	0	0	13721.2	2817.12	7097.59	3941.02	0	0	0	0	0	2465.47	0	0	0	0	0	0	0	0	0	0	0
COTU-CM-0949	0	0	0	0	0	0	0	0	0	0	0	0	0	0	0	0	0	0	0	0	0	0	0	0	0	0	0	0	0	0	0	0	0	4527.88	0	0	0	0	0	3043.09	0	0	0	0	0	0	0	7800.31	0
COTU-CM-0950	0	0	0	0	0	0	0	0	37913.2	0	0	0	0	0	0	0	0	0	0	0	0	0	0	0	0	0	0	0	0	0	0	0	0	0	0	0	0	0	0	0	0	0	0	0	0	5605.84	8792.65	0	0
COTU-CM-0951	0	0	0	0	0	0	0	0	0	0	0	0	0	0	0	0	0	0	0	0	0	0	34524.8	0	0	0	0	0	0	0	0	0	0	0	0	0	0	0	0	0	0	0	0	0	0	0	0	0	0
COTU-CM-0952	0	0	5749.3	0	0	0	10619.5	7653.31	0	0	0	0	0	0	0	0	0	0	0	0	0	0	0	0	0	0	0	0	0	0	0	0	0	0	0	0	0	0	0	0	0	0	0	0	0	0	0	0	0
COTU-CM-0953	0	0	0	0	0	0	0	0	0	0	0	0	0	0	0	0	0	0	0	0	0	0	0	0	0	0	0	0	0	0	0	0	0	0	0	0	0	0	0	0	0	0	0	0	0	11211.7	0	0	0
COTU-CM-0954	0	0	0	0	0	0	0	0	0	0	0	0	0	0	0	0	0	0	0	0	0	0	0	2476.52	0	0	0	0	0	0	0	0	0	0	0	120330	0	0	0	0	0	0	0	0	5309.73	0	0	0	0
COTU-CM-0955	0	0	0	0	80680.1	0	0	0	0	0	0	0	0	0	0	0	0	0	0	0	0	0	0	0	0	0	0	0	0	0	0	0	0	0	0	0	0	0	0	0	0	0	0	0	0	0	0	0	0
COTU-CM-0957	0	0	0	0	0	0	0	0	0	0	0	0	0	0	0	0	0	0	0	0	0	0	0	0	0	0	0	0	0	0	0	0	0	0	0	0	0	0	0	0	0	0	0	48000	0	0	0	0	0
COTU-CM-0958	0	0	0	0	0	0	0	0	0	0	0	0	0	0	0	0	0	0	0	0	0	0	0	0	0	0	0	0	0	0	0	0	264597	253561	249305	207843	95037.8	170118	1.00904e+06	310395	542049	359770	0	0	0	0	1758.53	0	4715.45
COTU-CM-0961	0	0	0	25702.8	0	0	0	0	0	0	37305.5	0	0	0	0	0	21821.1	17080.5	9639.46	934.579	0	0	7672.19	9906.06	0	0	7657.96	1621.62	0	0	0	0	175101	149420	133249	109391	79198.2	73964.2	384554	39560.1	137228	52907.4	79342.1	6000	10619.5	1868.61	0	5850.23	9430.89
COTU-CM-0962	0	31004.2	28746.5	3671.82	0	0	53097.3	22959.9	0	0	24870.3	22587.5	0	3957.45	44869.8	17096.3	7273.71	0	0	2803.74	0	0	0	9906.06	0	0	7657.96	1621.62	0	0	0	0	194556	99613.3	85967.4	87512.9	110877	71498.7	361546	30430.9	137228	49380.2	0	48000	21238.9	1868.61	0	17550.7	11788.6
COTU-CM-0963	73334.8	54257.4	57493	7343.64	209768	27148.9	42477.9	38266.5	15165.3	0	18652.7	0	0	3957.45	14956.6	5698.78	14547.4	68321.9	57836.8	8411.21	51507.4	12163.9	3836.09	17335.6	14364.9	0	15315.9	810.811	0	0	7097.59	0	0	0	0	0	0	0	0	0	0	0	0	0	0	0	0	0	0
COTU-CM-0964	20952.8	15502.1	0	3671.82	0	0	10619.5	7653.31	0	3904.92	6217.58	4517.5	0	23744.7	0	11397.6	0	0	0	0	10301.5	0	3836.09	2476.52	0	0	38289.8	0	10290.9	0	0	0	0	0	0	0	0	0	0	0	0	0	0	0	0	0	0	0	0
COTU-CM-0965	20952.8	15502.1	22997.2	3671.82	48408.1	9049.64	21238.9	7653.31	7582.64	3904.92	24870.3	4517.5	6055.49	31659.6	14956.6	0	7273.71	42701.2	0	1869.16	10301.5	4054.64	3836.09	4953.03	0	1272.08	15315.9	0	3430.3	0	14195.2	0	0	0	0	0	0	0	0	0	0	0	0	0	0	0	0	0	0
COTU-CM-0966	0	0	0	0	0	0	0	0	0	0	0	0	108999	0	0	0	0	0	0	0	0	0	0	0	0	0	0	0	0	0	0	0	0	0	0	3646.37	0	0	0	3043.09	0	0	0	0	5309.73	0	0	0	0
COTU-CM-0969	796206	782856	350707	319448	822937	280539	647788	443892	508037	152292	460101	397540	139276	146426	418785	108277	327317	358690	395218	136449	453265	60819.6	145772	118873	294481	39434.5	390556	12162.2	44593.9	39439.7	49683.1	15764.1	0	0	0	0	0	0	0	0	0	0	0	0	0	0	0	0	0
COTU-CM-0970	0	0	0	0	0	0	0	0	0	0	0	0	0	0	0	0	0	0	0	0	0	0	0	0	0	0	0	0	0	0	0	0	0	4527.88	4298.37	10939.1	0	2465.47	282663	106508	0	0	0	0	0	0	0	0	0
COTU-CM-0971	0	0	0	0	0	0	0	0	0	0	0	0	0	19787.3	0	0	0	0	0	0	61808.8	0	0	0	0	0	0	0	0	0	0	0	0	0	0	0	0	0	0	0	0	0	0	0	0	0	0	0	0
COTU-CM-0972	62858.4	23253.2	11498.6	40390	48408.1	45248.2	84955.8	38266.5	15165.3	15619.7	161657	356882	163498	134553	224349	712347	0	0	9639.46	30841.1	20602.9	20273.2	11508.3	14859.1	21547.4	16537	84237.6	45405.4	106339	56342.4	170342	145818	0	0	0	0	0	0	0	0	0	0	0	0	0	0	0	0	0
COTU-CM-0973	0	0	0	0	0	0	0	0	0	0	0	72280	0	0	0	0	0	0	0	0	0	0	0	0	0	0	0	0	0	0	0	0	0	0	0	0	0	0	0	0	0	0	0	0	0	0	0	0	0
COTU-CM-0974	52382	46506.3	17247.9	44061.9	96816.1	9049.64	31858.4	53573.2	75826.4	7809.85	149222	284602	320941	87063.9	209392	712347	7273.71	8540.23	38557.9	48598.1	20602.9	20273.2	15344.4	17335.6	57459.8	36890.3	84237.6	53513.5	75466.5	59159.5	85171.1	202963	0	0	0	0	0	0	0	0	0	0	0	0	0	0	0	0	0
COTU-CM-0975	0	0	0	0	0	0	0	0	0	0	0	36140	0	0	0	0	0	0	0	0	0	0	0	0	0	0	0	0	0	0	0	0	0	0	0	0	0	0	0	0	0	0	0	0	0	0	0	0	0
COTU-CM-0976	0	0	0	0	0	0	0	0	0	0	0	0	0	0	0	0	0	0	0	0	0	0	0	0	0	0	0	0	0	0	0	0	7782.25	4527.88	8596.74	0	7919.82	7396.42	23007.5	6086.17	13722.8	0	0	0	0	0	0	0	0
COTU-CM-0977	0	0	0	0	0	0	0	0	0	0	0	0	0	0	0	0	0	0	0	0	0	0	0	0	0	0	0	0	0	0	0	0	15564.5	4527.88	8596.74	10939.1	23759.4	7396.42	29581.1	0	34306.9	21163	0	0	0	0	0	0	0
COTU-CM-0978	0	0	0	0	0	0	0	0	0	0	0	0	0	3957.45	0	0	0	0	0	0	0	0	0	0	0	0	0	0	0	0	0	0	11673.4	4527.88	12895.1	0	0	2465.47	23007.5	15215.4	20584.1	10581.5	0	0	0	0	0	0	0
COTU-CM-0979	0	0	0	0	0	0	0	0	0	0	0	0	0	0	0	0	0	0	0	0	0	0	0	0	0	0	0	0	0	0	0	0	27237.9	18111.5	12895.1	7292.74	31679.3	14792.8	6573.57	3043.09	0	0	0	0	0	0	1758.53	1950.08	2357.72
COTU-CM-0980	0	0	0	0	0	0	0	0	0	0	0	0	0	0	0	0	0	0	0	0	0	0	0	0	0	0	0	0	0	0	0	0	3891.13	4527.88	8596.74	0	7919.82	12327.4	9860.35	0	6861.38	17635.8	0	0	0	0	0	0	0
COTU-CM-0981	0	0	0	0	0	0	0	0	0	0	0	0	0	0	0	0	0	0	0	0	0	0	0	0	0	0	0	0	0	0	0	0	11673.4	4527.88	34387	3646.37	0	0	19720.7	12172.3	13722.8	17635.8	0	0	0	0	0	0	0
COTU-CM-0982	0	0	0	0	0	0	0	0	0	0	0	0	0	0	0	0	0	0	0	0	0	0	0	0	0	0	0	0	0	0	0	0	0	4527.88	0	3646.37	0	0	3286.78	3043.09	27445.5	21163	0	0	0	0	0	0	0
COTU-CM-0983	0	0	0	0	0	0	0	0	0	0	0	0	0	0	0	0	0	0	0	0	0	0	0	0	0	0	0	0	0	0	0	0	0	0	8596.74	0	0	0	289237	155197	96059.3	45853.1	8815.79	0	0	0	0	0	16504.1
COTU-CM-0984	0	0	0	0	0	0	0	0	0	0	0	0	0	0	0	0	0	0	0	0	0	0	0	0	0	0	0	0	0	0	0	0	11673.4	4527.88	8596.74	0	0	2465.47	0	0	48029.6	28217.3	0	0	0	0	0	0	0
COTU-CM-0985	0	0	0	0	0	0	0	0	0	0	0	0	0	0	0	0	0	0	19278.9	53271	0	0	0	0	0	0	0	0	0	0	0	0	0	4527.88	0	3646.37	7919.82	0	3286.78	0	137228	126978	0	0	0	0	0	0	0
COTU-CM-0986	0	7751.05	11498.6	0	129088	18099.3	0	0	0	0	0	0	0	0	0	0	138200	187885	144592	165421	2.61657e+06	660906	0	0	0	0	99553.5	810.811	41163.6	53525.2	63878.3	0	62258	22639.4	47282.1	29171	31679.3	24654.7	26294.3	9129.26	13722.8	52907.4	0	0	0	0	1758.53	0	0
COTU-CM-0987	0	0	0	0	0	0	0	0	0	0	0	0	0	0	0	0	0	0	0	0	0	0	0	0	0	0	0	0	0	0	0	0	23346.8	13583.6	4298.37	21878.2	7919.82	4930.94	3286.78	0	102921	102288	0	0	0	0	0	0	0
COTU-CM-0988	0	0	0	0	0	0	0	0	0	0	0	0	0	0	0	0	0	0	0	0	0	0	0	0	0	0	0	0	0	0	0	0	0	0	0	0	0	0	345112	298222	6861.38	0	0	0	0	0	0	0	0
COTU-CM-0989	0	0	0	0	0	0	0	0	0	0	0	0	0	0	0	0	0	0	0	0	0	0	0	0	0	0	0	0	0	0	0	0	81713.6	45278.8	85967.4	32817.3	15839.6	27120.2	55875.3	18258.5	1.61242e+06	754812	0	0	0	0	0	0	0
COTU-CM-0990	0	0	0	0	0	0	0	0	0	0	0	0	0	0	0	0	0	0	0	0	0	0	0	0	0	0	0	0	0	0	0	0	27237.9	40750.9	8596.74	7292.74	0	0	19720.7	3043.09	54891	38798.8	0	0	0	0	0	0	0
COTU-CM-0991	0	0	0	0	0	0	0	0	0	0	0	0	0	0	0	0	0	0	0	0	0	0	0	0	0	0	0	0	0	0	0	0	23346.8	13583.6	30088.6	14585.5	7919.82	7396.42	26294.3	6086.17	34306.9	31744.4	0	0	0	0	0	0	0
COTU-CM-0992	0	0	0	0	0	0	0	0	0	0	0	0	0	0	0	0	29094.8	8540.23	0	11215	0	0	19180.5	17335.6	0	0	68921.7	0	6860.59	5634.24	0	0	23346.8	13583.6	21491.8	14585.5	7919.82	2465.47	19720.7	30430.9	41168.3	14108.6	0	0	0	0	0	0	0
COTU-CM-0993	0	0	0	0	0	0	0	0	0	0	0	0	0	0	0	0	0	68321.9	0	0	0	0	0	0	0	0	0	0	0	0	0	0	0	0	0	0	0	0	0	0	0	0	0	0	0	0	0	0	0
COTU-CM-0994	136193	93012.6	17247.9	3671.82	161360	45248.2	223009	61226.5	181983	39049.2	24870.3	13552.5	18166.5	3957.45	254262	22795.1	21821.1	111023	96394.6	2803.74	20602.9	16218.5	23016.6	27241.7	100555	26713.7	15315.9	0	17151.5	2817.12	0	68967.9	194556	90557.6	163338	273478	253434	224358	203781	194757	116643	63488.9	0	6000	0	0	0	0	0
COTU-CM-0995	0	0	0	0	0	0	0	0	0	0	0	0	0	0	0	0	0	0	0	0	0	0	0	0	0	0	0	0	0	0	0	0	0	0	8596.74	0	7919.82	2465.47	26294.3	0	0	3527.16	0	0	0	0	0	0	0
COTU-CM-0996	146670	162772	17247.9	18359.1	129088	45248.2	223009	160719	60661.2	19524.6	24870.3	36140	24222	51446.9	29913.2	0	0	8540.23	0	0	0	4054.64	11508.3	2476.52	21547.4	2544.16	7657.96	4054.05	0	2817.12	7097.59	3941.02	7782.25	0	4298.37	0	0	0	0	0	6861.38	0	0	0	0	0	0	0	0
COTU-CM-0997	0	0	0	0	0	0	0	0	0	0	0	0	0	0	0	0	0	0	0	0	0	0	0	0	0	0	0	0	0	0	0	0	0	0	0	0	0	0	3286.78	0	0	0	0	0	0	0	0	0	0
COTU-CM-0999	0	0	0	0	0	0	0	0	0	0	0	4517.5	0	0	0	0	0	0	0	0	0	0	0	0	0	0	0	0	0	0	0	0	0	0	0	0	0	0	0	0	0	0	0	0	0	0	0	0	0
COTU-CM-1000	0	0	0	0	0	0	0	0	0	0	0	0	0	0	0	0	0	0	0	0	0	0	0	0	0	0	0	0	0	0	0	0	0	0	0	0	0	0	0	0	0	0	0	0	0	0	15826.8	0	0
COTU-CM-1001	0	0	0	0	0	0	0	0	0	0	0	4517.5	0	0	0	0	0	0	0	0	0	0	0	0	0	0	0	0	0	0	0	0	0	0	0	0	0	0	0	0	0	0	0	0	0	0	0	0	0
COTU-CM-1003	0	0	0	0	0	0	0	0	0	0	0	0	0	0	0	0	0	0	0	0	0	0	0	0	0	0	0	0	3430.3	0	0	0	0	0	0	14585.5	0	0	0	0	0	0	0	0	0	0	0	0	0
COTU-CM-1004	0	0	0	0	0	0	0	0	0	0	0	0	0	0	0	0	0	0	0	0	0	0	0	0	0	0	0	0	0	0	0	0	0	0	0	0	0	0	0	0	0	0	0	0	0	0	0	0	0
COTU-CM-1006	0	0	0	0	0	0	0	0	0	0	0	0	0	0	0	0	0	0	0	0	0	0	0	0	0	0	0	0	0	0	0	0	0	0	0	0	0	0	0	0	0	0	0	0	0	11211.7	0	0	0
COTU-CM-1007	0	0	0	0	0	0	0	0	0	0	0	0	0	0	0	0	0	0	0	0	0	0	0	0	0	0	0	0	0	0	0	0	3891.13	0	0	7292.74	7919.82	0	3286.78	0	0	0	0	0	10619.5	0	12309.7	0	0
COTU-CM-1009	0	0	0	0	0	0	0	0	0	0	0	0	0	0	0	0	0	0	0	0	0	0	0	0	0	0	0	0	0	0	0	0	0	0	0	0	0	0	0	0	0	0	0	0	0	0	12309.7	0	0
COTU-CM-1010	0	0	0	0	0	0	0	0	113740	23429.5	24870.3	36140	0	0	0	0	0	0	0	0	0	0	0	0	0	2544.16	0	810.811	0	0	0	0	3891.13	4527.88	0	7292.74	0	4930.94	0	0	13722.8	0	0	0	0	0	0	0	0
COTU-CM-1011	0	0	0	0	0	0	0	0	60661.2	19524.6	6217.58	40657.5	0	0	0	0	0	0	0	0	0	0	0	0	7182.47	0	0	0	0	0	0	0	0	0	0	0	0	0	0	0	0	0	0	0	0	0	0	0	0
COTU-CM-1012	0	0	0	0	0	0	0	7653.31	0	0	6217.58	0	0	0	0	0	0	0	0	0	0	0	3836.09	0	0	0	0	0	0	0	0	0	31129	4527.88	21491.8	29171	39599.1	27120.2	3286.78	9129.26	20584.1	10581.5	0	0	5309.73	0	0	0	0
COTU-CM-1013	0	0	0	0	0	0	0	0	0	0	0	0	0	0	0	0	0	0	0	5607.48	0	0	0	0	0	0	0	0	0	0	0	0	0	0	0	0	0	0	0	0	0	0	0	0	0	0	0	0	0
COTU-CM-1014	0	0	0	0	0	0	0	0	0	0	0	0	0	0	0	0	0	0	0	0	0	0	0	0	0	0	53605.7	0	0	0	0	0	0	0	0	0	0	0	0	0	0	0	0	0	0	0	0	0	0
COTU-CM-2001	136193	178274	97738.1	40390	145224	45248.2	116814	252559	75826.4	50764	143004	189735	78721.4	67276.7	209392	108277	29094.8	119563	0	9345.79	0	16218.5	19180.5	14859.1	79007.2	17809.1	38289.8	7297.3	10290.9	5634.24	14195.2	9852.56	112843	72446.1	68773.9	178672	87118	118343	144618	73034	137228	151668	0	0	0	5605.84	7034.12	1950.08	0
COTU-CM-2002	3.78198e+06	4.01505e+06	2.63318e+06	2.29856e+06	7.00303e+06	3.35742e+06	7.05133e+06	5.46446e+06	0	0	0	0	0	0	0	0	567349	1.32374e+06	848273	335514	659294	263551	625283	678565	0	0	0	0	0	0	0	0	1.12843e+06	1.21347e+06	1.42706e+06	929825	1.02958e+06	821002	230075	152154	528326	169304	26447.4	0	0	5605.84	3517.06	3900.16	0
COTU-CM-2003	618107	736350	597927	304761	1.82337e+06	923063	1.42301e+06	1.10973e+06	2.11556e+06	449066	1.03212e+06	677625	841713	926043	4.11306e+06	695251	138200	392851	106034	84112.1	453265	113530	295379	294705	488408	217526	536057	304865	305296	261992	326489	396073	0	0	0	0	0	0	0	0	0	0	0	0	0	0	0	0	0
COTU-CM-2004	0	0	0	0	0	0	0	0	0	0	0	0	0	0	0	0	0	0	0	0	0	0	0	0	0	1272.08	0	0	0	0	0	0	603125	706349	696336	371930	348472	382148	716519	261705	967454	264537	8815.79	18000	21238.9	11211.7	5275.59	7800.31	2357.72
COTU-CM-2005	1.70765e+06	875869	517437	249684	2.33972e+06	615375	1.17876e+06	834211	1.47862e+06	437351	1.00103e+06	519512	296719	304724	927309	165265	298222	640517	202429	23364.5	494471	89202	260854	257558	445313	38162.4	313976	17837.8	140642	84513.5	191635	45321.8	0	0	0	0	0	0	0	0	0	0	0	0	0	0	0	0	0
COTU-CM-2006	10476.4	15502.1	45994.4	14687.3	96816.1	117645	42477.9	38266.5	7582.64	7809.85	31087.9	22587.5	6055.49	23744.7	119653	56987.8	0	93942.5	9639.46	4672.9	41205.9	12163.9	0	7429.55	0	0	22973.9	1621.62	137212	0	7097.59	11823.1	0	27167.3	8596.74	3646.37	7919.82	2465.47	95316.7	63904.8	0	3527.16	0	0	0	0	0	0	0
COTU-CM-2007	230481	93012.6	80490.2	135857	516353	199092	191150	336746	151653	35144.3	292226	81315	163498	150383	1.12174e+06	250746	29094.8	85402.3	38557.9	6542.06	30904.4	20273.2	11508.3	42100.8	14364.9	3816.24	45947.8	1621.62	17151.5	25354.1	63878.3	39410.2	70040.3	49806.7	30088.6	43756.4	23759.4	44378.5	131471	118680	363653	366825	0	0	0	0	0	0	0
COTU-CM-2008	1.95909e+06	1.56571e+06	868144	1.05381e+06	4.06628e+06	1.59274e+06	3.41947e+06	2.47202e+06	1.19048e+06	320204	1.08808e+06	27105	1.22321e+06	1.84021e+06	7.17917e+06	780733	1.03287e+06	1.29812e+06	1.12782e+06	326168	1.69974e+06	713616	1.59582e+06	1.07481e+06	818802	188268	1.60051e+06	17837.8	521405	608498	766540	575389	89495.9	117725	124653	54695.6	63358.5	41913	433855	91292.6	233287	91706.2	0	0	5309.73	0	0	1950.08	2357.72
COTU-CM-2009	282863	255785	143733	132186	1.90405e+06	533929	923894	642878	940248	285059	845591	185217	242220	300766	987135	68385.3	130927	290368	77115.7	50467.3	834419	223005	199477	170880	380671	44522.8	551373	30000	99478.6	70428	156147	43351.2	1.58369e+06	1.70701e+06	2.03743e+06	805848	791982	747038	1.98522e+06	496023	1.89374e+06	1.05109e+06	26447.4	36000	31858.4	11211.7	24619.4	3900.16	21219.5
COTU-CM-2010	5.25915e+06	5.50325e+06	2.82866e+06	2.39403e+06	8.87481e+06	4.11758e+06	9.91858e+06	6.29867e+06	4.67091e+06	1.09728e+06	5.7637e+06	1.76634e+06	3.38502e+06	2.55651e+06	1.02901e+07	2.92347e+06	901940	2.45105e+06	1.55195e+06	830841	1.90577e+06	531157	1.61883e+06	1.65679e+06	667970	162826	2.00639e+06	197838	850714	436653	873004	920229	0	0	0	0	0	0	0	0	0	0	0	0	0	0	0	0	0
COTU-CM-2011	293339	403055	701415	308433	1.62974e+06	533929	605310	604611	424628	214771	1.18756e+06	1.41398e+06	399662	324511	837569	472999	50915.9	136644	298823	84112.1	298743	72983.5	57541.4	61912.9	57459.8	11448.7	222081	12162.2	65175.6	50708.1	333587	27587.2	0	9055.76	4298.37	21878.2	0	9861.89	3286.78	12172.3	0	17635.8	0	0	0	0	0	0	0
COTU-CM-2012	429532	527072	51743.7	128514	500217	244340	276106	260212	174401	85908.3	149222	0	30277.5	47489.4	284175	22795.1	160022	196425	19278.9	44859.8	133919	72983.5	65213.6	59436.4	21547.4	26713.7	61263.7	810.811	13721.2	8451.35	14195.2	17734.6	1.21403e+06	1.36742e+06	1.43995e+06	827726	784062	655816	959741	286050	1.13899e+06	426786	8815.79	12000	10619.5	5605.84	3517.06	11700.5	0
COTU-CM-2013	0	0	0	0	0	0	0	0	0	0	0	0	0	0	0	0	0	0	0	0	0	0	0	0	0	0	0	0	0	0	0	0	968890	792379	872569	871483	736543	562128	1.90633e+06	1.5185e+06	418544	313917	8815.79	12000	15929.2	9343.07	7034.12	13650.5	21219.5
COTU-CM-2014	0	0	0	0	0	0	0	0	0	0	0	0	0	0	0	0	0	0	0	0	0	0	0	0	0	0	0	0	0	0	0	0	762661	774267	722126	397454	300953	276133	581761	559928	741029	648997	8815.79	6000	10619.5	3737.23	0	5850.23	0
COTU-CM-2015	0	0	0	0	0	0	0	0	0	0	0	0	0	0	0	0	0	0	0	0	0	0	0	0	0	0	0	0	0	0	0	0	268488	316952	236410	138562	166316	118343	453576	380386	850811	507911	0	0	0	0	0	3900.16	2357.72
COTU-CM-2016	0	0	0	0	0	0	0	0	0	0	0	0	0	0	0	0	0	0	0	0	0	0	0	0	0	0	0	0	0	0	0	0	241250	267145	197725	131269	150477	93687.9	69022.5	60861.7	301901	112869	0	0	0	5605.84	0	1950.08	0
COTU-CM-2017	41905.6	38755.3	57493	22030.9	129088	54297.8	53097.3	45919.8	15165.3	15619.7	62175.8	36140	60554.9	27702.2	134609	28493.9	0	8540.23	9639.46	0	0	16218.5	0	2476.52	0	1272.08	38289.8	0	37733.3	11268.5	0	0	108952	67918.2	55878.8	244307	174236	207100	65735.7	197801	198980	317444	0	0	0	0	7034.12	1950.08	0
COTU-CM-2018	10476.4	46506.3	160980	187263	0	0	233628	76533.1	386715	359253	298444	225875	387551	245362	119653	256445	0	0	0	19626.2	0	0	0	2476.52	100555	34346.2	38289.8	4054.05	78896.8	19719.8	7097.59	23646.1	73931.4	104141	73072.3	171379	126717	118343	0	9129.26	6861.38	88179	0	0	0	18686.1	15826.8	13650.5	0
COTU-CM-2019	366674	511570	505938	488352	532489	895914	1.35929e+06	1.20922e+06	470124	538879	1.19999e+06	248462	623716	601532	673047	672456	65463.4	341609	125313	68224.3	61808.8	332480	241674	89154.6	596145	141201	451820	59189.2	109769	107050	0	61085.8	15564.5	4527.88	8596.74	14585.5	15839.6	19723.8	0	0	6861.38	63488.9	0	0	0	0	1758.53	0	0
COTU-CM-2020	0	0	0	0	0	0	0	0	0	0	0	0	0	0	0	0	0	0	0	0	0	0	0	0	0	0	0	0	0	0	0	0	0	0	17193.5	7292.74	7919.82	12327.4	0	0	54891	56434.6	0	0	0	0	0	0	0
COTU-CM-2021	0	0	0	0	0	0	0	0	0	0	0	0	0	0	0	0	0	0	0	0	0	0	0	0	0	0	0	0	0	0	0	0	1.24127e+06	1.17272e+06	1.21214e+06	714689	926618	951672	387840	426032	679276	984078	0	0	0	0	0	0	0
COTU-CM-2022	0	0	0	0	0	0	0	0	0	0	0	0	0	0	0	0	0	0	0	0	0	0	0	0	0	0	0	0	0	0	0	0	0	0	0	0	0	0	69022.5	94335.6	89197.9	49380.2	0	0	0	0	0	0	0
COTU-CM-2023	31429.2	23253.2	86239.5	73436.4	0	0	31858.4	30613.2	0	0	0	0	0	7914.9	2.88662e+06	632564	29094.8	8540.23	57836.8	52336.4	0	0	30688.8	7429.55	0	0	0	0	0	0	312294	423660	1.05839e+06	1.19536e+06	1.24653e+06	1.4075e+06	1.06126e+06	1.01084e+06	1.03534e+06	380386	301901	172831	35263.2	12000	5309.73	13080.3	5275.59	7800.31	2357.72
COTU-CM-2024	115240	69759.5	120735	257028	112952	18099.3	233628	99493	151653	15619.7	111916	81315	102943	15829.8	104696	324830	0	59781.6	38557.9	45794.4	0	4054.64	34524.8	32194.7	28729.9	3816.24	45947.8	2432.43	13721.2	19719.8	0	104437	50584.6	36223	21491.8	21878.2	23759.4	17258.3	16433.9	18258.5	3.93157e+06	3.83402e+06	0	0	0	0	0	0	2357.72
COTU-CM-2025	0	0	0	0	0	0	0	0	0	0	0	0	0	0	0	0	0	0	0	0	0	0	0	0	0	0	0	0	0	0	0	0	89495.9	81501.8	77370.7	10939.1	31679.3	44378.5	571900	489937	41168.3	35271.6	0	0	0	0	0	0	4715.45
COTU-CM-2026	817159	581329	1.12686e+06	833503	790665	325787	191150	160719	2.03973e+06	1.15976e+06	99481.3	103902	121110	91021.4	2.01914e+06	746540	65463.4	375770	183150	52336.4	51507.4	40546.4	11508.3	12382.6	366306	120848	38289.8	810.811	10290.9	8451.35	248416	133995	190665	208282	163338	164087	31679.3	83826	59162.1	73034	102921	52907.4	0	0	0	0	0	0	0
COTU-CM-2027	0	0	0	0	0	0	0	0	0	0	0	0	0	0	0	0	0	0	0	0	0	0	0	0	0	0	0	0	0	0	0	0	486391	321479	373958	342759	277194	315580	29581.1	18258.5	0	0	0	0	0	3737.23	3517.06	1950.08	0
COTU-CM-2028	0	0	0	47733.7	0	0	0	0	0	0	0	0	0	0	0	0	0	0	9639.46	934.579	0	0	3836.09	4953.03	0	0	0	0	3430.3	2817.12	0	0	268488	375814	335273	189611	150477	130670	128185	121723	144089	91706.2	0	0	0	0	0	0	0
COTU-CM-2029	1.48136e+07	8.85945e+06	9.4921e+06	9.7854e+06	1.05045e+07	5.26689e+06	1.61628e+07	1.70822e+07	7.94661e+06	5.09983e+06	9.27041e+06	5.61977e+06	9.85834e+06	7.62205e+06	1.32515e+07	5.20299e+06	2.36395e+06	4.86793e+06	877191	1.1972e+06	1.68944e+06	932566	1.31578e+06	1.10453e+06	3.02382e+06	1.28353e+06	1.31717e+06	103784	1.26578e+06	1.2677e+06	2.99518e+06	748794	529193	534290	494313	331820	269274	271202	696798	547755	1.57812e+06	1.29447e+06	8815.79	6000	0	1868.61	0	0	4715.45
COTU-CM-2030	0	0	0	0	0	0	0	0	0	0	0	0	0	0	0	0	0	0	0	0	0	0	0	0	0	0	0	0	0	0	0	0	431915	556929	490014	288063	380151	288460	6573.57	0	61752.4	42325.9	8815.79	0	0	0	0	0	0
COTU-CM-2031	0	0	0	0	0	0	0	0	0	0	0	0	0	0	0	0	0	0	0	0	0	0	0	0	0	0	0	0	0	0	0	0	653709	593152	670546	353698	237594	256409	1.03862e+06	757728	0	0	26447.4	0	26548.7	0	1758.53	3900.16	23577.2
COTU-CM-2032	0	0	0	0	0	0	0	0	0	0	0	0	0	0	0	0	0	0	0	0	0	0	0	0	0	0	0	0	0	0	0	0	81713.6	99613.3	68773.9	25524.6	0	14792.8	0	0	41168.3	31744.4	0	6000	0	0	0	0	0
COTU-CM-2033	0	0	0	0	0	0	42477.9	15306.6	22747.9	0	0	0	12111	0	0	0	0	0	0	0	0	0	3836.09	7429.55	0	2544.16	7657.96	0	0	0	0	0	365766	253561	296588	266185	213835	251478	85456.4	146068	397960	190467	0	0	0	0	0	1950.08	0
COTU-CM-2034	0	0	0	0	0	0	0	0	0	0	0	0	0	0	0	0	0	0	0	0	0	0	0	0	0	0	0	0	0	0	0	0	202339	249033	223515	113037	110877	110946	447003	91292.6	233287	81124.7	8815.79	0	0	1868.61	1758.53	1950.08	2357.72
COTU-CM-2035	31429.2	31004.2	68991.6	18359.1	161360	271489	435398	275519	7582.64	11714.8	62175.8	4517.5	163498	51446.9	14956.6	28493.9	0	102483	28918.4	40186.9	92713.3	97311.3	157280	133732	35912.4	33074.1	15315.9	810.811	75466.5	61976.6	49683.1	21675.6	723749	638431	825287	273478	253434	322977	0	0	0	0	26447.4	24000	21238.9	35503.6	35170.6	25351	0
COTU-CM-2036	0	0	5749.3	0	0	0	10619.5	22959.9	0	0	0	0	0	0	0	0	0	0	0	0	0	0	0	2476.52	0	0	0	0	0	0	0	0	38911.3	49806.7	34387	29171	39599.1	9861.89	578474	352998	178396	151668	0	0	0	0	0	0	0
COTU-CM-2037	0	0	0	0	0	0	0	0	0	0	0	0	0	0	0	0	0	0	0	0	0	0	0	0	0	0	0	0	0	0	0	0	552540	475427	498611	244307	221755	157790	3286.78	0	198980	84651.8	0	6000	5309.73	0	7034.12	0	0
COTU-CM-2038	0	0	0	0	0	0	0	0	0	0	0	0	0	0	0	0	0	0	0	0	0	0	0	0	0	0	0	0	0	0	0	0	0	0	0	3646.37	7919.82	0	0	3043.09	857672	190467	0	0	0	0	0	0	0
COTU-CM-2039	0	0	0	0	0	0	0	0	0	0	0	0	0	0	0	0	0	0	0	0	0	0	0	0	0	0	0	0	0	0	0	0	5.10516e+06	4.77238e+06	5.532e+06	2.97908e+06	2.56602e+06	2.2633e+06	6.91539e+06	2.93962e+06	1.104e+07	7.58339e+06	61710.5	0	79646	29897.8	28136.5	33151.3	25935
COTU-CM-2040	0	0	0	0	0	0	0	0	0	0	0	0	0	0	0	0	0	0	0	0	0	0	0	0	0	0	0	0	0	0	0	0	70040.3	76973.9	94564.1	29171	7919.82	22189.2	193920	139982	20584.1	10581.5	0	0	0	0	0	0	0
COTU-CM-2041	0	0	0	0	0	0	0	0	0	0	0	0	0	0	0	0	0	0	0	0	0	0	0	0	0	0	0	0	0	0	0	0	171210	163004	189128	113037	134637	130670	108464	219102	185257	261010	0	0	0	0	0	0	0
COTU-CM-2042	0	0	0	0	0	0	0	0	0	0	0	0	0	0	0	0	0	0	0	0	0	0	0	0	0	0	0	0	0	0	0	0	128407	176587	163338	69281	79198.2	71498.7	78882.8	161284	878256	881790	0	0	0	0	0	0	0
COTU-CM-2043	31429.2	0	0	0	0	0	0	0	0	0	0	9035	0	0	0	0	0	8540.23	0	0	0	0	0	0	0	0	0	0	0	0	0	0	529193	507122	520103	266185	221755	155325	289237	106508	528326	246901	0	6000	0	0	0	0	4715.45
COTU-CM-2044	0	0	0	0	0	0	0	0	0	0	0	0	0	0	0	0	0	0	0	0	0	0	0	0	0	0	0	0	0	0	0	0	291834	221866	214918	87512.9	63358.5	51774.9	65735.7	158240	13722.8	10581.5	0	0	0	0	0	0	0
COTU-CM-2045	0	0	0	0	0	0	0	0	0	0	0	0	0	0	0	0	0	0	0	0	0	0	0	0	0	0	0	0	0	0	0	0	1.21792e+06	1.28592e+06	1.22074e+06	838665	1.01374e+06	776624	1.16023e+06	483851	1.18016e+06	493802	17631.6	36000	15929.2	14948.9	14068.2	15600.6	7073.17
COTU-CM-2046	0	0	0	0	0	0	0	0	0	0	0	0	48443.9	19787.3	0	0	0	0	0	0	0	0	0	0	0	0	0	0	17151.5	42256.8	0	0	54475.8	22639.4	34387	32817.3	31679.3	32051.1	348399	182585	13722.8	10581.5	0	0	0	0	0	0	2357.72
COTU-CM-2047	20952.8	31004.2	0	0	0	0	191150	130106	0	0	292226	85832.5	54499.4	23744.7	0	0	0	42701.2	0	0	0	0	19180.5	47053.8	0	0	76579.6	0	0	39439.7	7097.59	0	140081	126781	159040	32817.3	7919.82	76429.6	1.10107e+06	1.09855e+06	1.81826e+06	1.2592e+06	0	0	0	0	0	1950.08	0
COTU-CM-2048	0	0	0	0	0	0	0	0	0	0	0	0	0	0	0	0	0	0	0	0	0	0	0	0	0	0	0	0	0	0	0	0	194556	144892	180532	69281	102958	115877	65735.7	54775.5	27445.5	14108.6	0	0	0	0	1758.53	3900.16	2357.72
COTU-CM-2049	0	0	0	0	0	0	0	0	0	0	0	0	0	0	0	0	0	0	0	0	0	0	0	0	0	0	0	0	0	0	0	0	62258	45278.8	42983.7	40110.1	31679.3	12327.4	42728.2	18258.5	644969	444422	0	0	0	0	1758.53	0	0
COTU-CM-2050	0	0	0	0	0	0	0	0	0	0	0	0	0	0	0	0	0	0	0	0	0	0	0	0	0	0	0	0	0	0	0	0	38911.3	40750.9	34387	32817.3	0	0	46015	45646.3	0	31744.4	0	0	0	0	0	0	0
COTU-CM-2051	0	23253.2	40245.1	22030.9	112952	0	21238.9	45919.8	37913.2	23429.5	31087.9	81315	66610.4	39574.5	194436	108277	7273.71	17080.5	0	1869.16	10301.5	12163.9	0	2476.52	43094.8	17809.1	0	1621.62	6860.59	8451.35	35488	13793.6	46693.5	58862.4	68773.9	54695.6	23759.4	32051.1	124898	179542	89197.9	81124.7	0	6000	0	1868.61	0	0	2357.72
COTU-CM-2052	0	0	0	0	0	0	0	38266.5	0	0	0	0	0	0	0	0	0	0	0	0	0	0	0	0	0	0	0	0	0	0	0	0	50584.6	58862.4	25790.2	43756.4	15839.6	24654.7	26294.3	18258.5	0	67016	0	0	5309.73	0	0	0	0
COTU-CM-2053	460962	395304	310462	187263	661577	461531	520354	405625	386715	109338	379272	835737	320941	328468	583307	302035	72737.1	341609	48197.3	17757	164824	97311.3	42197	24765.2	387854	31802	160817	15405.4	58315	76062.2	120659	23646.1	7782.25	0	4298.37	3646.37	7919.82	4930.94	6573.57	12172.3	6861.38	17635.8	0	0	0	0	0	0	0
COTU-CM-2054	20952.8	31004.2	45994.4	58749.1	0	0	21238.9	7653.31	219897	23429.5	6217.58	90350	48443.9	31659.6	14956.6	0	7273.71	0	28918.4	3738.32	0	4054.64	0	0	21547.4	3816.24	0	0	3430.3	16902.7	14195.2	3941.02	0	0	0	3646.37	0	2465.47	3286.78	0	6861.38	3527.16	0	0	0	0	0	0	0
COTU-CM-2055	220004	271287	339209	587491	597033	244340	520354	321439	181983	42954.2	422795	411092	302775	205787	329045	296336	7273.71	230586	38557.9	47663.6	61808.8	89202	46033.1	59436.4	57459.8	16537	114869	6486.49	27442.4	59159.5	42585.6	137936	11673.4	4527.88	12895.1	3646.37	31679.3	4930.94	49301.8	21301.6	0	10581.5	0	0	0	0	0	0	7073.17
COTU-CM-2056	0	0	0	0	0	0	0	0	0	0	0	0	0	35617.1	0	0	0	0	0	0	0	0	0	0	0	0	0	0	0	0	0	0	2.16347e+06	2.34544e+06	2.66929e+06	2.36285e+06	1.90076e+06	2.02415e+06	1.02876e+06	426032	1.65359e+06	751285	52894.7	60000	37168.1	22423.4	10551.2	46801.9	33008.1
COTU-CM-2057	0	0	0	0	0	0	0	0	0	0	0	0	0	0	0	0	0	0	0	0	0	0	0	0	0	0	0	0	0	0	0	0	132298	117725	120354	80220.2	55438.7	41913	111751	69991	356792	232793	0	0	0	1868.61	0	0	0
COTU-CM-2058	0	0	0	0	0	0	0	0	0	0	0	0	0	0	0	0	0	0	0	0	0	0	0	0	0	0	0	0	0	0	0	0	1.15956e+06	928215	1.01871e+06	616237	451430	461043	2.72474e+06	1.41199e+06	2.40834e+06	1.85176e+06	0	0	31858.4	11211.7	0	0	44796.7
COTU-CM-2059	0	0	0	0	0	0	53097.3	61226.5	0	0	0	0	0	0	0	0	0	0	0	0	0	0	30688.8	27241.7	0	0	0	0	0	0	0	0	241250	172059	206322	226075	182156	175049	124898	112594	20584.1	144614	8815.79	0	15929.2	1868.61	1758.53	1950.08	0
COTU-CM-2060	0	0	0	0	0	0	0	0	0	0	0	0	0	0	0	0	0	0	0	0	0	0	0	0	0	0	0	0	0	0	0	0	252923	253561	219217	160440	237594	187376	69022.5	63904.8	144089	183412	8815.79	0	10619.5	13080.3	3517.06	33151.3	0
COTU-CM-2061	0	0	0	0	0	0	0	0	0	0	0	0	0	0	0	0	0	0	0	0	0	0	0	0	0	0	0	0	0	0	0	0	62258	72446.1	68773.9	65634.7	63358.5	44378.5	36154.6	21301.6	185257	246901	0	0	0	0	0	0	0
COTU-CM-2062	324768	372051	385203	249684	1.09725e+06	371035	1.07257e+06	520425	295723	156197	739892	478855	714548	233490	942265	683853	65463.4	375770	115674	42056.1	267838	154076	141935	99060.6	287299	96678.1	306318	7297.3	96048.3	157759	376172	141877	365766	353175	249305	145855	166316	83826	328678	164327	747890	430314	17631.6	18000	15929.2	7474.45	0	17550.7	25935
COTU-CM-2063	0	0	0	0	0	0	0	0	0	0	0	0	0	0	0	0	0	0	0	0	0	0	0	0	0	0	0	0	0	0	0	0	1.10508e+06	1.218e+06	1.02731e+06	1.2033e+06	1.77404e+06	1.08234e+06	0	0	13722.8	63488.9	17631.6	18000	10619.5	41109.5	21102.4	27301.1	0
COTU-CM-2064	0	0	0	0	0	0	0	0	0	0	0	0	0	0	0	0	0	0	0	0	0	0	0	0	0	0	0	0	0	0	0	0	474717	511650	494313	499553	395991	315580	765821	2.01757e+06	212703	659579	8815.79	6000	0	5605.84	0	5850.23	0
COTU-CM-2065	0	0	0	0	0	0	0	0	0	0	0	0	0	0	0	0	0	0	0	0	0	0	0	0	0	0	0	0	0	0	0	0	2.14401e+06	2.60806e+06	2.50165e+06	1.31634e+06	1.61564e+06	1.23274e+06	62448.9	48689.4	0	0	26447.4	48000	37168.1	22423.4	8792.65	0	7073.17
COTU-CM-2066	0	0	0	0	0	0	0	0	0	0	0	0	0	0	0	0	0	0	0	0	0	0	0	0	0	0	0	0	0	0	0	0	478609	316952	438434	306295	221755	283529	0	3043.09	0	3527.16	8815.79	0	10619.5	1868.61	3517.06	0	0
COTU-CM-2067	0	0	0	0	0	0	0	0	0	0	0	0	0	0	0	0	0	0	0	0	0	0	0	0	0	0	0	0	0	0	0	0	0	0	0	0	0	0	1.08793e+06	380386	1.1184e+06	620780	0	0	0	0	0	0	9430.89
COTU-CM-2068	1.02669e+06	1.19366e+06	1.57531e+06	1.14194e+06	1.51679e+06	434383	265487	382665	2.19897e+06	1.24177e+06	254921	307190	278553	213702	6.88003e+06	2.09715e+06	72737.1	572196	327742	70093.5	236934	60819.6	7672.19	86678.1	682335	150105	91895.5	810.811	27442.4	28171.2	738150	394102	66149.1	31695.2	73072.3	80220.2	39599.1	36982.1	36154.6	27387.8	89197.9	52907.4	0	0	0	0	0	0	2357.72
COTU-CM-2069	0	0	0	0	0	0	0	0	0	0	0	0	0	0	0	0	0	0	0	0	0	0	0	0	0	0	0	0	0	0	0	0	0	0	0	0	0	0	3286.78	0	1.31738e+06	1.22392e+06	0	0	0	0	0	0	0
COTU-CM-2071	0	0	0	0	0	0	0	0	0	0	0	0	0	0	0	0	0	0	0	0	0	0	0	0	0	0	0	0	0	0	0	0	58366.9	81501.8	73072.3	25524.6	71278.3	22189.2	55875.3	155197	61752.4	151668	26447.4	30000	31858.4	7474.45	22860.9	11700.5	35365.9
COTU-CM-2072	0	0	0	0	0	0	0	0	0	0	0	0	0	0	0	0	0	0	0	0	0	0	0	0	0	0	0	0	0	0	0	0	42802.4	72446.1	34387	61988.3	23759.4	29585.7	46015	9129.26	13722.8	45853.1	52894.7	48000	58407.1	1868.61	0	5850.23	23577.2
COTU-CM-2073	31429.2	93012.6	51743.7	25702.8	451809	135745	106195	84186.4	0	0	254921	18070	18166.5	55404.3	74783	28493.9	0	25620.7	9639.46	0	41205.9	0	7672.19	17335.6	0	0	15315.9	1621.62	10290.9	0	0	3941.02	35020.1	22639.4	34387	43756.4	47518.9	4930.94	75596	51732.4	75475.1	67016	0	0	0	0	0	0	2357.72
COTU-CM-2074	2.3991e+06	2.09278e+06	5.47908e+06	2.137e+06	4.80853e+06	2.19001e+06	4.30088e+06	3.3445e+06	2.65393e+06	823939	3.87977e+06	338812	2.94902e+06	1.63047e+06	4.80107e+06	2.09145e+06	94558.2	649058	645844	114019	535677	145967	387446	371477	395036	89045.6	405872	7297.3	226400	143673	447148	137936	280161	380342	245007	175026	205915	182445	328678	356041	150950	211630	17631.6	18000	10619.5	0	7034.12	0	4715.45
COTU-CM-2075	0	0	0	0	0	0	42477.9	160719	0	0	0	0	6055.49	0	0	0	0	0	0	0	0	0	3836.09	4953.03	0	0	15315.9	0	0	0	0	0	116734	140364	124653	120330	87118	83826	121611	127810	233287	232793	0	0	5309.73	0	1758.53	7800.31	2357.72
COTU-CM-2076	6.00298e+06	8.21612e+06	3.08737e+06	2.98152e+06	4.37286e+06	3.61081e+06	6.47788e+06	5.93897e+06	1.12451e+07	3.65501e+06	5.3036e+06	2.3762e+06	1.79243e+06	1.34553e+06	7.86717e+06	1.23094e+06	1.55657e+06	4.04807e+06	1.27241e+06	807477	1.12286e+06	425737	1.1048e+06	1.57754e+06	1.40058e+06	698372	1.66178e+06	171892	370472	292980	532319	628593	0	0	0	0	0	0	0	0	0	0	0	0	0	0	0	0	0
COTU-CM-2077	0	0	0	0	0	0	0	0	0	0	0	0	0	0	0	0	0	0	0	0	0	0	0	0	0	0	0	0	0	0	0	0	66149.1	95085.5	120354	72927.4	55438.7	73964.2	161052	24344.7	260732	59961.7	0	0	0	1868.61	0	0	0
COTU-CM-2078	0	0	0	0	0	0	0	0	0	0	0	0	0	39574.5	0	0	0	0	0	0	0	0	0	0	0	0	0	0	0	0	0	0	3.4203e+06	3.54986e+06	3.63212e+06	2.45765e+06	2.20963e+06	2.10305e+06	2.60971e+06	1.23549e+06	1.61928e+06	726595	35263.2	24000	10619.5	3737.23	0	35101.4	0
[truncated: 12 more columns]
